# Supplementary material for: Phagocytic ‘teeth’ and myosin-II ‘jaw’ power target constriction during phagocytosis
Source: eLife. 2021 Oct 28;10:e68627. doi: 10.7554/eLife.68627 (PMC8585483; doi:10.7554/eLife.68627)
Supplement: Figure 1—source data 1. [file elife-68627-fig1-data1.xlsx]

## Sheet: 1 - S1a,b,c
	Max. constriction	Constriction at 50% engulfment	Engulfment time
	(mm)	(mm)	(min)
	0.37	0.37	3.52
	1.1	0.46	4.18
	0.48	0	3.74
	0.96	0.63	4.4
	0.16	0.16	2.42
	0.93	0.23	3.52
	0.8	0.76	2.42
	0.11	0.11	2.86
	0.17	0.17	2.86
	0.38	0.16	5.72
	0.31	0.24	1.54
	0.07	0.06	1.76
	0.07	0.06	1.76
	0.72	0.41	3.3
	0.53	0.53	1.76
	0.42	0.11	3.3
	0.36	0.18	3.96
	0.21	0.07	2.2
	0.45	0.18	4.4
	0.43	0.08	2.64
	0.16	0.1	1.98
	0.4	0.26	2.64
	0.53	0.44	8.36

## Sheet: 1 - S1e
	Time	Effective diameter	Bulk Stress	Sphericity
	(min)	(mm)	(kPa)
	-0.788966	8.40419	-0.0580437	0.897082
	-0.333793	8.49038	0.0580437	0.913837
	0.121379	8.48897	0.0561421	0.979408
	0.576552	8.41697	-0.0411012	0.968602
	1.03172	8.38662	-0.0816743	0.979226
	1.4869	8.31386	-0.177557	0.975388
	1.94207	8.21699	-0.302667	0.93813
	2.39724	8.15261	-0.384335	0.923933
	2.85241	8.11308	-0.43379	0.936973
	3.30759	8.14591	-0.392744	0.89487
	3.76276	7.95369	-0.628228	0.820847
	4.21793	7.76733	-0.846021	0.886605
	4.6731	7.38546	-1.25161	0.902369
	5.12828	7.25474	-1.39315	0.927767

## Sheet: 1 - S1f
	Binned, normalized data			NaNs indicate that no observations were made in the corresponding time bin for a particular event									Unbinned, non-normalized data
Target	Bin index	Normalized Time*	Normalized diameter	Bulk stress	Normalized sphericity	Displacement of the target						Target	Time	Phagocytosing*	Diameter	Sphericity	Displacement of the target**		*1s indicate that the process of phagocytosis is ongoing. 0s indicate that phagocytosis either still needs to start, or that it is completed
		* t = 0 is inititiation, and t = 1 finish of phagocytosis		(kPa)		(mm)							t = 0 is initiation of phagocytosis		(mm)		(mm)		*Translocation/displacement at time 0 is lacking, because translocation was calculated using the change in position between two timeframes
Target 1	Bin 1	-2.42857	NaN	NaN	NaN	NaN
	Bin 2	-2.05102	NaN	NaN	NaN	NaN						Target 1	-79.2	0	7.81111	0.967874	NaN
	Bin 3	-1.67347	NaN	NaN	NaN	NaN							-66	0	7.90753	0.944247	1.9197
	Bin 4	-1.29592	NaN	NaN	NaN	NaN							-52.8	0	7.62646	0.976004	2.1648
	Bin 5	-0.918367	1.01269	0.138525	0.983688	NaN							-39.6	0	7.80825	0.971534	2.89706
	Bin 6	-0.540816	0.994426	-0.0701171	1.00325	2.8436							-26.4	0	7.66844	0.967228	3.65319
	Bin 7	-0.163265	1.0026	0.0219295	0.994532	2.16263							-13.2	0	7.76728	0.985538	2.65936
	Bin 8	0.214286	0.986716	-0.156022	0.972421	1.54148							0	0	7.7687	0.983928	2.67251
	Bin 9	0.591837	0.982933	-0.198621	0.952562	0.926511							13.2	1	7.7292	0.978959	2.40324
	Bin 10	0.969388	0.992754	-0.0895778	0.98689	1.65442							26.4	1	7.78245	0.922918	1.95544
	Bin 11	1.34694	0.992737	-0.0900837	0.907632	1.39814							39.6	1	7.84389	0.980595	1.61934
	Bin 12	1.72449	NaN	NaN	NaN	NaN							52.8	1	7.76589	0.9768	2.47484
	Bin 13	2.10204	NaN	NaN	NaN	NaN							66	1	7.58069	0.900324	1.35954
	Bin 14	2.47959	NaN	NaN	NaN	NaN							79.2	1	7.62675	0.958203	0.790068
	Bin 15	2.85714	NaN	NaN	NaN	NaN							92.4	1	7.65758	0.940311	0.528531
	Bin 16	3.23469	NaN	NaN	NaN	NaN							105.6	1	7.56014	0.881473	1.26388
	Bin 17	3.61224	NaN	NaN	NaN	NaN							118.8	1	7.64477	0.897534	0.496271
	Bin 18	3.9898	NaN	NaN	NaN	NaN							132	1	7.6512	0.983915	1.41736
	Bin 19	4.36735	NaN	NaN	NaN	NaN							145.2	1	7.6352	0.983432	1.58572
	Bin 20	4.7449	NaN	NaN	NaN	NaN							158.4	0	7.71291	0.979743	1.39756
	Bin 21	5.12245	NaN	NaN	NaN	NaN							171.6	0	7.73918	0.913241	2.23697
													184.8	0	7.73125	0.960274	1.39743
Target 2	Bin 1	-2.42857	NaN	NaN	NaN	NaN							198	0	7.69941	0.926955	1.51699
	Bin 2	-2.05102	NaN	NaN	NaN	NaN							211.2	0	7.7096	0.837325	1.27929
	Bin 3	-1.67347	NaN	NaN	NaN	NaN
	Bin 4	-1.29592	NaN	NaN	NaN	NaN						Target 2	0	0	7.9601	0.932898	NaN
	Bin 5	-0.918367	NaN	NaN	NaN	NaN							13.2	1	7.96859	0.942902	1.01079
	Bin 6	-0.540816	NaN	NaN	NaN	NaN							26.4	1	7.803	0.91945	0.301118
	Bin 7	-0.163265	0.989871	-0.107478	0.986024	NaN							39.6	1	7.8028	0.912277	1.02347
	Bin 8	0.214286	0.984581	-0.166187	0.93056	0.651225							52.8	1	7.88389	0.916432	1.02573
	Bin 9	0.591837	0.959614	-0.419773	0.864738	0.615243							66	1	7.75775	0.923362	0.882567
	Bin 10	0.969388	0.951704	-0.518639	0.888158	0.605311							79.2	1	7.74919	0.845126	0.534607
	Bin 11	1.34694	NaN	NaN	NaN	NaN							92.4	1	7.84748	0.896238	0.289782
	Bin 12	1.72449	NaN	NaN	NaN	NaN							105.6	1	7.804	0.74736	0.738553
	Bin 13	2.10204	NaN	NaN	NaN	NaN							118.8	1	7.95395	0.907191	0.957276
	Bin 14	2.47959	NaN	NaN	NaN	NaN							132	1	7.95567	0.914395	0.847459
	Bin 15	2.85714	NaN	NaN	NaN	NaN							145.2	1	7.82277	0.875731	0.308328
	Bin 16	3.23469	NaN	NaN	NaN	NaN							158.4	1	7.84662	0.765651	0.541847
	Bin 17	3.61224	NaN	NaN	NaN	NaN							171.6	1	7.96687	0.897768	0.432613
	Bin 18	3.9898	NaN	NaN	NaN	NaN							184.8	1	7.85652	0.875838	0.224697
	Bin 19	4.36735	NaN	NaN	NaN	NaN							198	1	7.72086	0.813039	0.46235
	Bin 20	4.7449	NaN	NaN	NaN	NaN							211.2	1	7.4051	0.764266	0.94922
	Bin 21	5.12245	NaN	NaN	NaN	NaN							224.4	1	7.06023	0.749662	1.08073
													237.6	1	7.57073	0.809637	2.04084
Target 3	Bin 1	-2.42857	NaN	NaN	NaN	NaN							250.8	0	7.62045	0.787717	0.807242
	Bin 2	-2.05102	NaN	NaN	NaN	NaN							264	0	7.68095	0.845257	0.0859608
	Bin 3	-1.67347	NaN	NaN	NaN	NaN							277.2	0	7.55254	0.864931	0.115046
	Bin 4	-1.29592	NaN	NaN	NaN	NaN							290.4	0	7.53742	0.809775	0.412116
	Bin 5	-0.918367	NaN	NaN	NaN	NaN							303.6	0	7.51613	0.880699	0.170658
	Bin 6	-0.540816	0.967725	-0.199638	1.02112	NaN
	Bin 7	-0.163265	1.018	0.392832	0.962265	1.37507						Target 3	-13.2	0	7.05342	0.965744	NaN
	Bin 8	0.214286	1.01062	0.300768	0.999276	0.494674							0	0	7.30507	0.900556	1.3209
	Bin 9	0.591837	0.989699	0.0520899	0.931655	0.640913							13.2	1	7.50748	0.971019	1.77663
	Bin 10	0.969388	0.962516	-0.257375	0.950231	0.853118							26.4	1	7.44708	0.858679	1.02768
	Bin 11	1.34694	0.963138	-0.250073	0.955958	0.826445							39.6	1	7.34984	0.951151	1.0087
	Bin 12	1.72449	NaN	NaN	NaN	NaN							52.8	1	7.39221	0.924573	0.350585
	Bin 13	2.10204	NaN	NaN	NaN	NaN							66	1	7.35619	0.959538	0.124739
	Bin 14	2.47959	NaN	NaN	NaN	NaN							79.2	1	7.29939	0.935247	0.332024
	Bin 15	2.85714	NaN	NaN	NaN	NaN							92.4	1	7.18736	0.839071	0.606038
	Bin 16	3.23469	NaN	NaN	NaN	NaN							105.6	1	7.15398	0.869085	0.984676
	Bin 17	3.61224	NaN	NaN	NaN	NaN							118.8	1	6.99832	0.905573	1.16969
	Bin 18	3.9898	NaN	NaN	NaN	NaN							132	0	7.00346	0.880301	1.00914
	Bin 19	4.36735	NaN	NaN	NaN	NaN							145.2	0	7.04457	0.910236	0.380521
	Bin 20	4.7449	NaN	NaN	NaN	NaN							158.4	0	7.08621	0.941255	0.192666
	Bin 21	5.12245	NaN	NaN	NaN	NaN							171.6	0	7.00532	0.948206	0.712463
													184.8	0	6.96842	0.822897	1.57421
Target 4	Bin 1	-2.42857	NaN	NaN	NaN	NaN
	Bin 2	-2.05102	NaN	NaN	NaN	NaN						Target 4	-184.8	0	7.05675	0.975751	NaN
	Bin 3	-1.67347	NaN	NaN	NaN	NaN							-171.6	0	7.07364	0.970158	1.1808
	Bin 4	-1.29592	1.00531	0.0559385	1.0115	NaN							-158.4	0	7.22714	0.962592	0.916871
	Bin 5	-0.918367	1.00666	0.0706046	0.986095	0.835881							-145.2	0	7.25912	0.959185	1.22326
	Bin 6	-0.540816	0.994089	-0.0730118	0.989124	0.806449							-132	0	7.11317	0.966467	0.543534
	Bin 7	-0.163265	0.991324	-0.103513	1.02419	1.53336							-118.8	0	7.22606	0.933669	1.06473
	Bin 8	0.214286	0.953692	-0.502332	0.925743	0.603163							-105.6	0	7.0875	0.931042	1.57756
	Bin 9	0.591837	0.796015	-1.81198	0.850715	1.67936							-92.4	0	7.22838	0.939351	0.157708
	Bin 10	0.969388	0.894234	-1.08671	1.01226	0.988592							-79.2	0	7.1056	0.90536	0.629863
	Bin 11	1.34694	0.866317	-1.33354	0.992009	0.452796							-66	0	7.09074	0.922732	0.556059
	Bin 12	1.72449	0.862901	-1.36206	1.00427	0.27967							-52.8	0	6.99882	0.950922	1.75261
	Bin 13	2.10204	0.849533	-1.47415	1.00922	0.397004							-39.6	0	7.05189	0.975151	0.840311
	Bin 14	2.47959	NaN	NaN	NaN	NaN							-26.4	0	7.12466	0.973473	0.253398
	Bin 15	2.85714	NaN	NaN	NaN	NaN							-13.2	0	7.17128	0.971517	1.541
	Bin 16	3.23469	NaN	NaN	NaN	NaN							0	0	6.97845	0.979672	2.29095
	Bin 17	3.61224	NaN	NaN	NaN	NaN							13.2	1	7.06934	0.97774	2.74338
	Bin 18	3.9898	NaN	NaN	NaN	NaN							26.4	1	7.0346	0.984916	0.539327
	Bin 19	4.36735	NaN	NaN	NaN	NaN							39.6	1	7.01968	0.98141	0.552118
	Bin 20	4.7449	NaN	NaN	NaN	NaN							52.8	1	7.02257	0.986178	0.626846
	Bin 21	5.12245	NaN	NaN	NaN	NaN							66	1	6.95535	0.973888	0.746976
													79.2	1	6.78969	0.943878	0.536267
Target 5	Bin 1	-2.42857	NaN	NaN	NaN	NaN							92.4	1	6.61119	0.845365	0.386618
	Bin 2	-2.05102	NaN	NaN	NaN	NaN							105.6	1	6.55551	0.675393	0.719108
	Bin 3	-1.67347	NaN	NaN	NaN	NaN							118.8	1	5.1378	0.870828	2.28812
	Bin 4	-1.29592	NaN	NaN	NaN	NaN							132	1	4.6516	0.84087	0.681941
	Bin 5	-0.918367	NaN	NaN	NaN	NaN							145.2	1	6.05955	0.676032	4.42445
	Bin 6	-0.540816	0.999044	-0.00747911	0.985593	NaN							158.4	1	6.16041	0.82895	0.648827
	Bin 7	-0.163265	1.00646	0.0733232	1.0258	1.35655							171.6	1	6.31448	0.849415	0.353464
	Bin 8	0.214286	1.00838	0.095852	1.03061	0.978725							184.8	1	6.40135	0.956102	0.374503
	Bin 9	0.591837	0.971212	-0.306283	0.991556	0.567351							198	0	6.38716	0.971564	1.00053
	Bin 10	0.969388	0.929729	-0.67868	0.954504	0.844006							211.2	0	6.4292	0.972527	1.62996
	Bin 11	1.34694	0.940081	-0.643772	1.02316	0.340861							224.4	0	6.33973	0.967066	1.25242
	Bin 12	1.72449	NaN	NaN	NaN	NaN							237.6	0	6.26124	0.970935	0.685553
	Bin 13	2.10204	NaN	NaN	NaN	NaN							250.8	0	6.14079	0.951447	0.491154
	Bin 14	2.47959	NaN	NaN	NaN	NaN							264	0	6.16172	0.932958	0.837839
	Bin 15	2.85714	NaN	NaN	NaN	NaN							277.2	0	6.15598	0.952333	0.34002
	Bin 16	3.23469	NaN	NaN	NaN	NaN							290.4	0	6.16698	0.954358	0.393827
	Bin 17	3.61224	NaN	NaN	NaN	NaN							303.6	0	6.19985	0.950328	0.20114
	Bin 18	3.9898	NaN	NaN	NaN	NaN							316.8	0	6.21106	0.950312	0.277151
	Bin 19	4.36735	NaN	NaN	NaN	NaN							330	0	6.19048	0.965174	0.348356
	Bin 20	4.7449	NaN	NaN	NaN	NaN							343.2	0	6.13711	0.967014	0.310524
	Bin 21	5.12245	NaN	NaN	NaN	NaN							356.4	0	6.05411	0.968619	0.217371
													369.6	0	6.11102	0.948913	0.244945
Target 6	Bin 1	-2.42857	NaN	NaN	NaN	NaN							382.8	0	6.06312	0.966416	0.430195
	Bin 2	-2.05102	NaN	NaN	NaN	NaN							396	0	6.02813	0.963067	0.363813
	Bin 3	-1.67347	NaN	NaN	NaN	NaN
	Bin 4	-1.29592	NaN	NaN	NaN	NaN						Target 5	-79.2	0	7.22936	0.937184	NaN
	Bin 5	-0.918367	NaN	NaN	NaN	NaN							-66	0	7.12331	0.966108	3.95066
	Bin 6	-0.540816	NaN	NaN	NaN	NaN							-52.8	0	7.34281	0.929099	3.20008
	Bin 7	-0.163265	1.00059	-0.0275377	0.999518	NaN							-39.6	0	7.02329	0.869153	1.61201
	Bin 8	0.214286	0.995811	-0.0813764	0.990235	0.904515							-26.4	0	7.44278	0.946615	1.88945
	Bin 9	0.591837	0.951506	-0.553658	0.92842	0.573657							-13.2	0	7.23601	0.96856	2.25212
	Bin 10	0.969388	0.920422	-0.862785	0.903734	1.12905							0	0	7.26795	0.958204	2.03106
	Bin 11	1.34694	0.928496	-0.785685	0.978701	0.069234							13.2	1	7.24833	0.970845	0.298385
	Bin 12	1.72449	NaN	NaN	NaN	NaN							26.4	1	7.39121	0.967534	0.983236
	Bin 13	2.10204	NaN	NaN	NaN	NaN							39.6	1	7.33475	0.974645	0.807122
	Bin 14	2.47959	NaN	NaN	NaN	NaN							52.8	1	7.23759	0.965527	1.76739
	Bin 15	2.85714	NaN	NaN	NaN	NaN							66	1	7.29661	0.965586	0.381596
	Bin 16	3.23469	NaN	NaN	NaN	NaN							79.2	1	7.43758	0.970209	1.82091
	Bin 17	3.61224	NaN	NaN	NaN	NaN							92.4	1	7.29602	0.969286	0.980431
	Bin 18	3.9898	NaN	NaN	NaN	NaN							105.6	1	7.25624	0.980877	1.22302
	Bin 19	4.36735	NaN	NaN	NaN	NaN							118.8	1	7.29115	0.97	0.751972
	Bin 20	4.7449	NaN	NaN	NaN	NaN							132	1	7.22188	0.976589	0.714423
	Bin 21	5.12245	NaN	NaN	NaN	NaN							145.2	1	7.2141	0.975273	0.87829
													158.4	1	7.19159	0.965572	0.516604
Target 7	Bin 1	-2.42857	NaN	NaN	NaN	NaN							171.6	1	7.19843	0.957188	0.266114
	Bin 2	-2.05102	NaN	NaN	NaN	NaN							184.8	1	7.14576	0.966518	0.735884
	Bin 3	-1.67347	NaN	NaN	NaN	NaN							198	1	6.94596	0.937979	0.560622
	Bin 4	-1.29592	NaN	NaN	NaN	NaN							211.2	1	6.48911	0.809011	0.446593
	Bin 5	-0.918367	NaN	NaN	NaN	NaN							224.4	1	5.40436	0.629865	1.53164
	Bin 6	-0.540816	0.994273	-0.0580437	0.974828	NaN							237.6	0	7.03995	0.925407	2.18423
	Bin 7	-0.163265	1.00321	0.0436108	1.03276	1.00883							250.8	0	7.07464	0.942848	0.542463
	Bin 8	0.214286	0.988926	-0.11807	1.06079	0.560527							264	0	7.03935	0.974431	0.254905
	Bin 9	0.591837	0.96654	-0.362409	1.0161	0.692338							277.2	0	6.98884	0.959862	0.20674
	Bin 10	0.969388	0.957109	-0.461346	0.97305	0.273405							290.4	0	6.83598	0.969438	0.344054
	Bin 11	1.34694	0.905854	-0.958759	0.954504	0.268199							303.6	0	6.83531	0.967116	0.396521
	Bin 12	1.72449	0.858286	-1.39315	1.00817	0.401202							316.8	0	6.83904	0.971165	0.225513
	Bin 13	2.10204	NaN	NaN	NaN	NaN							330	0	6.74204	0.956907	0.400551
	Bin 14	2.47959	NaN	NaN	NaN	NaN
	Bin 15	2.85714	NaN	NaN	NaN	NaN						Target 6	0	0	8.23246	0.994795	NaN
	Bin 16	3.23469	NaN	NaN	NaN	NaN							13.2	1	8.18282	0.992543	0.504243
	Bin 17	3.61224	NaN	NaN	NaN	NaN							26.4	1	8.22214	0.992233	1.32972
	Bin 18	3.9898	NaN	NaN	NaN	NaN							39.6	1	8.17556	0.986996	0.439191
	Bin 19	4.36735	NaN	NaN	NaN	NaN							52.8	1	8.18663	0.985595	0.974838
	Bin 20	4.7449	NaN	NaN	NaN	NaN							66	1	8.15758	0.979305	1.29952
	Bin 21	5.12245	NaN	NaN	NaN	NaN							79.2	1	7.9611	0.948776	0.765941
													92.4	1	7.80156	0.929547	0.665339
Target 8	Bin 1	-2.42857	NaN	NaN	NaN	NaN							105.6	1	7.6662	0.889303	0.289692
	Bin 2	-2.05102	NaN	NaN	NaN	NaN							118.8	1	7.44941	0.782004	1.60302
	Bin 3	-1.67347	NaN	NaN	NaN	NaN							132	0	7.60285	0.946402	1.59866
	Bin 4	-1.29592	NaN	NaN	NaN	NaN							145.2	0	7.61121	0.965631	0.185462
	Bin 5	-0.918367	NaN	NaN	NaN	NaN							158.4	0	7.62076	0.972505	0.069234
	Bin 6	-0.540816	0.990718	0	0.966414	NaN
	Bin 7	-0.163265	1.00928	0.217647	1.03359	0.673974						Target 7	-39.6	0	8.44341	0.919286	NaN
	Bin 8	0.214286	1.00191	0.130794	0.971821	0.251545							-26.4	0	8.36496	0.874878	0.685878
	Bin 9	0.591837	0.985334	-0.0616128	0.904858	0.552853							-13.2	0	8.47851	0.880424	0.555566
	Bin 10	0.969388	0.964757	-0.290826	0.886427	0.969486							0	0	8.50225	0.947249	1.35082
	Bin 11	1.34694	0.939928	-0.554978	0.960656	1.15317							13.2	1	8.47384	0.979396	1.44509
	Bin 12	1.72449	0.963958	-0.299385	0.900989	1.02224							26.4	1	8.5041	0.979419	1.23332
	Bin 13	2.10204	0.969847	-0.235129	0.905457	0.832706							39.6	1	8.43995	0.965467	0.45934
	Bin 14	2.47959	0.969427	-0.239756	0.857289	0.748916							52.8	1	8.394	0.971737	0.117022
	Bin 15	2.85714	NaN	NaN	NaN	NaN							66	1	8.37453	0.977776	0.60599
	Bin 16	3.23469	NaN	NaN	NaN	NaN							79.2	1	8.39872	0.980675	1.01953
	Bin 17	3.61224	NaN	NaN	NaN	NaN							92.4	1	8.33692	0.977396	0.598863
	Bin 18	3.9898	NaN	NaN	NaN	NaN							105.6	1	8.2908	0.97338	0.46123
	Bin 19	4.36735	NaN	NaN	NaN	NaN							118.8	1	8.2449	0.968106	0.824841
	Bin 20	4.7449	NaN	NaN	NaN	NaN							132	1	8.18909	0.908153	0.887388
	Bin 21	5.12245	NaN	NaN	NaN	NaN							145.2	1	8.16422	0.916075	0.866944
													158.4	1	8.14099	0.93179	0.472052
Target 9	Bin 1	-2.42857	NaN	NaN	NaN	NaN							171.6	1	8.10967	0.951172	0.410464
	Bin 2	-2.05102	NaN	NaN	NaN	NaN							184.8	1	8.12182	0.952654	0.294889
	Bin 3	-1.67347	NaN	NaN	NaN	NaN							198	0	8.10775	0.907092	0.152466
	Bin 4	-1.29592	0.961541	-0.386687	1.01031	NaN							211.2	0	8.13417	0.852599	0.279626
	Bin 5	-0.918367	1.00868	0.140533	0.980623	1.70687							224.4	0	8.15765	0.93714	0.276286
	Bin 6	-0.540816	1.00113	0.0528106	1.00074	1.60456							237.6	0	7.92888	0.827745	0.363756
	Bin 7	-0.163265	1.01024	0.159455	0.998008	0.534371							250.8	0	7.97851	0.81395	0.258318
	Bin 8	0.214286	0.999583	0.0346879	1.01569	0.159873							264	0	7.74644	0.887564	0.306383
	Bin 9	0.591837	0.984268	-0.138885	1.01887	0.722744							277.2	0	7.78822	0.885646	0.291637
	Bin 10	0.969388	0.977332	-0.215729	1.02943	1.10758							290.4	0	7.64045	0.926376	0.243981
	Bin 11	1.34694	0.981616	-0.168398	1.02994	0.675026							303.6	0	7.13047	0.878362	0.240673
	Bin 12	1.72449	0.966342	-0.334959	1.0242	0.596754							316.8	0	7.25474	0.927767	0.401202
	Bin 13	2.10204	0.964738	-0.352277	1.02202	0.522224
	Bin 14	2.47959	0.968146	-0.315854	1.01317	0.276081						Target 8	0	0	9.06029	0.893852	NaN
	Bin 15	2.85714	NaN	NaN	NaN	NaN							13.2	1	9.23007	0.955981	0.673974
	Bin 16	3.23469	NaN	NaN	NaN	NaN							26.4	1	9.10181	0.899459	0.233822
	Bin 17	3.61224	NaN	NaN	NaN	NaN							39.6	1	9.22353	0.898246	0.269268
	Bin 18	3.9898	NaN	NaN	NaN	NaN							52.8	1	9.01106	0.836918	0.552853
	Bin 19	4.36735	NaN	NaN	NaN	NaN							66	1	8.8549	0.804743	0.811452
	Bin 20	4.7449	NaN	NaN	NaN	NaN							79.2	0	8.79086	0.834999	1.12752
	Bin 21	5.12245	NaN	NaN	NaN	NaN							92.4	0	8.59581	0.888526	1.15317
													105.6	0	8.76905	0.804391	1.04348
Target 10	Bin 1	-2.42857	NaN	NaN	NaN	NaN							118.8	0	8.86209	0.862288	1.001
	Bin 2	-2.05102	NaN	NaN	NaN	NaN							132	0	8.86943	0.837471	0.832706
	Bin 3	-1.67347	NaN	NaN	NaN	NaN							145.2	0	8.86559	0.792921	0.748916
	Bin 4	-1.29592	NaN	NaN	NaN	NaN
	Bin 5	-0.918367	0.986001	-0.135017	1.00939	NaN						Target 9	-52.8	0	7.85303	0.969547	NaN
	Bin 6	-0.540816	1.01004	0.135017	0.998066	1.10983							-39.6	0	8.20594	0.912782	2.40754
	Bin 7	-0.163265	1.00822	0.113695	0.998588	0.919564							-26.4	0	8.27013	0.969325	1.0062
	Bin 8	0.214286	1.01504	0.19376	1.00953	1.5805							-13.2	0	8.13364	0.96737	0.662541
	Bin 9	0.591837	0.991801	-0.0739662	1.01188	1.20714							0	0	8.21905	0.953347	2.54658
	Bin 10	0.969388	0.989218	-0.103402	1.00726	0.909476							13.2	1	8.32101	0.985519	0.420077
	Bin 11	1.34694	0.990066	-0.093663	0.991042	0.785517							26.4	1	8.18044	0.929954	0.648666
	Bin 12	1.72449	0.976223	-0.247134	1.00141	0.683474							39.6	1	8.16373	0.974706	0.159873
	Bin 13	2.10204	0.960619	-0.414694	0.995287	1.82067							52.8	1	8.03579	0.976005	0.553843
	Bin 14	2.47959	0.931132	-0.717093	0.951907	2.39239							66	1	8.04151	0.979515	0.891644
	Bin 15	2.85714	NaN	NaN	NaN	NaN							79.2	1	7.97608	0.986923	1.12477
	Bin 16	3.23469	NaN	NaN	NaN	NaN							92.4	0	7.98793	0.988863	1.0904
	Bin 17	3.61224	NaN	NaN	NaN	NaN							105.6	0	8.02252	0.990125	1.00985
	Bin 18	3.9898	NaN	NaN	NaN	NaN							118.8	0	8.01145	0.986636	0.340197
	Bin 19	4.36735	NaN	NaN	NaN	NaN							132	0	7.93761	0.988113	0.826282
	Bin 20	4.7449	NaN	NaN	NaN	NaN							145.2	0	7.84687	0.977624	0.367227
	Bin 21	5.12245	NaN	NaN	NaN	NaN							158.4	0	7.91732	0.983919	0.495205
													171.6	0	7.84097	0.977639	0.549244
Target 11	Bin 1	-2.42857	NaN	NaN	NaN	NaN							184.8	0	7.90698	0.972287	0.276081
	Bin 2	-2.05102	NaN	NaN	NaN	NaN
	Bin 3	-1.67347	NaN	NaN	NaN	NaN						Target 10	-39.6	0	7.31857	0.993036	NaN
	Bin 4	-1.29592	NaN	NaN	NaN	NaN							-26.4	0	7.61537	0.984177	3.6869
	Bin 5	-0.918367	0.99874	-0.0161505	1.00053	NaN							-13.2	0	7.65525	0.966656	1.87648
	Bin 6	-0.540816	1.00224	0.023625	0.988305	1.29123							0	0	7.64284	0.988381	0.343182
	Bin 7	-0.163265	0.99805	-0.0275641	1.02766	0.965617							13.2	1	7.63291	0.964815	1.49508
	Bin 8	0.214286	0.936135	-0.671487	0.927161	0.955494							26.4	1	7.63751	0.991245	0.344049
	Bin 9	0.591837	0.891981	-1.10072	0.741399	2.02716							39.6	1	7.68693	0.988751	1.5805
	Bin 10	0.969388	0.894259	-1.07681	0.963974	0.801271							52.8	1	7.46603	0.991656	1.44923
	Bin 11	1.34694	0.892715	-1.09956	1.04132	1.24624							66	1	7.55578	0.990445	0.965044
	Bin 12	1.72449	0.847977	-1.48258	1.0481	0.712619							79.2	1	7.49694	0.989661	0.890063
	Bin 13	2.10204	NaN	NaN	NaN	NaN							92.4	0	7.48573	0.983379	0.928889
	Bin 14	2.47959	NaN	NaN	NaN	NaN							105.6	0	7.53134	0.974472	0.731285
	Bin 15	2.85714	NaN	NaN	NaN	NaN							118.8	0	7.46419	0.966806	0.839749
	Bin 16	3.23469	NaN	NaN	NaN	NaN							132	0	7.40888	0.976335	0.5337
	Bin 17	3.61224	NaN	NaN	NaN	NaN							145.2	0	7.37697	0.985253	0.833249
	Bin 18	3.9898	NaN	NaN	NaN	NaN							158.4	0	7.3018	0.987546	1.68459
	Bin 19	4.36735	NaN	NaN	NaN	NaN							171.6	0	7.24772	0.962047	1.95675
	Bin 20	4.7449	NaN	NaN	NaN	NaN							184.8	0	7.05146	0.93231	2.39239
	Bin 21	5.12245	NaN	NaN	NaN	NaN
												Target 11	-118.8	0	7.60507	0.970654	NaN
Target 12	Bin 1	-2.42857	NaN	NaN	NaN	NaN							-105.6	0	7.51326	0.948	0.814232
	Bin 2	-2.05102	NaN	NaN	NaN	NaN							-92.4	0	7.39246	0.955522	0.794995
	Bin 3	-1.67347	NaN	NaN	NaN	NaN							-79.2	0	7.76533	0.899046	1.17767
	Bin 4	-1.29592	NaN	NaN	NaN	NaN							-66	0	7.57116	0.916223	0.527538
	Bin 5	-0.918367	NaN	NaN	NaN	NaN							-52.8	0	7.66451	0.936657	2.04827
	Bin 6	-0.540816	1.00525	0	1.01251	NaN							-39.6	0	7.77372	0.958392	1.32155
	Bin 7	-0.163265	0.980127	-0.275505	0.941299	0.927719							-26.4	0	7.36693	0.882556	1.27154
	Bin 8	0.214286	0.966725	-0.420373	0.943957	1.04218							-13.2	0	7.60154	0.96508	1.28726
	Bin 9	0.591837	0.965491	-0.433289	0.924612	1.08428							0	0	7.54647	0.968673	0.554278
	Bin 10	0.969388	0.952612	-0.566151	0.899953	0.735053							13.2	1	7.56396	0.970078	1.75019
	Bin 11	1.34694	0.982401	-0.253021	0.877615	0.508025							26.4	1	7.59828	0.968318	0.916897
	Bin 12	1.72449	0.983169	-0.2447	0.9876	0.988449							39.6	1	7.54649	0.968478	0.641105
	Bin 13	2.10204	0.966439	-0.422429	1.00224	1.38724							52.8	1	7.47094	0.961782	0.980239
	Bin 14	2.47959	0.932878	-0.762866	0.992308	1.01851							66	1	7.27924	0.926341	1.29119
	Bin 15	2.85714	0.915331	-0.928442	0.988863	1.12562							79.2	1	7.13619	0.912645	0.722462
	Bin 16	3.23469	0.886493	-1.19388	0.998619	0.790703							92.4	1	6.9482	0.844161	0.784369
	Bin 17	3.61224	0.871242	-1.32613	0.987732	0.729483							105.6	1	6.6383	0.725741	0.999212
	Bin 18	3.9898	0.884699	-1.20966	0.995139	0.602931							118.8	1	6.7044	0.708682	2.8992
	Bin 19	4.36735	0.899561	-1.07648	0.998049	0.518053							132	1	6.9021	0.6837	2.12326
	Bin 20	4.7449	0.912184	-0.960721	1.00213	0.547572							145.2	1	6.8783	0.6898	2.7832
	Bin 21	5.12245	NaN	NaN	NaN	NaN							158.4	1	6.555	0.713804	0.303008
													171.6	1	6.33	0.6728	0.425174
Target 13	Bin 1	-2.42857	NaN	NaN	NaN	NaN							184.8	0	6.79059	0.969841	0.71192
	Bin 2	-2.05102	NaN	NaN	NaN	NaN							198	0	6.95058	0.962862	0.671689
	Bin 3	-1.67347	NaN	NaN	NaN	NaN							211.2	0	6.88445	0.956145	0.52274
	Bin 4	-1.29592	NaN	NaN	NaN	NaN							224.4	0	6.93046	0.98256	1.67483
	Bin 5	-0.918367	1.00218	0.0186098	1.00064	NaN							237.6	0	6.87831	0.966152	2.16015
	Bin 6	-0.540816	1.00199	0.016862	0.999951	0.406912							250.8	0	6.75845	0.980925	1.26702
	Bin 7	-0.163265	0.994398	-0.0695331	1.0003	0.449005							264	0	6.73825	0.989717	0.931992
	Bin 8	0.214286	0.984851	-0.175753	0.992784	0.650889							277.2	0	6.68703	0.99026	0.62581
	Bin 9	0.591837	0.9722	-0.313879	0.986765	0.489573							290.4	0	6.63104	0.989628	0.398993
	Bin 10	0.969388	0.984804	-0.17564	0.952858	1.10092							303.6	0	6.55516	0.987119	0.442196
	Bin 11	1.34694	0.993051	-0.0833388	0.907807	0.674169							316.8	0	6.41453	0.990432	0.541277
	Bin 12	1.72449	1.01571	0.176696	0.917515	0.482398							330	0	6.279	0.98882	1.33482
	Bin 13	2.10204	1.01984	0.224413	0.944472	0.208968							343.2	0	6.25258	0.984776	0.845802
	Bin 14	2.47959	NaN	NaN	NaN	NaN
	Bin 15	2.85714	NaN	NaN	NaN	NaN						Target 12	0	0	7.48993	0.984838	NaN
	Bin 16	3.23469	NaN	NaN	NaN	NaN							13.2	1	7.41168	0.960497	0.901042
	Bin 17	3.61224	NaN	NaN	NaN	NaN							26.4	1	7.19378	0.870645	0.954395
	Bin 18	3.9898	NaN	NaN	NaN	NaN							39.6	1	7.20288	0.918156	1.04218
	Bin 19	4.36735	NaN	NaN	NaN	NaN							52.8	1	7.19797	0.898389	1.15136
	Bin 20	4.7449	NaN	NaN	NaN	NaN							66	1	7.1894	0.900292	1.01719
	Bin 21	5.12245	NaN	NaN	NaN	NaN							79.2	1	7.0766	0.898147	0.753402
													92.4	0	7.11884	0.852563	0.716705
Target 14	Bin 1	-2.42857	NaN	NaN	NaN	NaN							105.6	0	7.28338	0.846461	0.306641
	Bin 2	-2.05102	NaN	NaN	NaN	NaN							118.8	0	7.35597	0.860794	0.709409
	Bin 3	-1.67347	NaN	NaN	NaN	NaN							132	0	7.28908	0.951537	0.984349
	Bin 4	-1.29592	NaN	NaN	NaN	NaN							145.2	0	7.36171	0.969675	0.99255
	Bin 5	-0.918367	NaN	NaN	NaN	NaN							158.4	0	7.26999	0.969427	1.32493
	Bin 6	-0.540816	0.99769	-0.0149657	1.01207	NaN							171.6	0	7.13151	0.980273	1.44954
	Bin 7	-0.163265	1.00636	0.0836733	0.983613	0.669254							184.8	0	6.98345	0.98594	0.900566
	Bin 8	0.214286	0.999629	0.00626408	1.01193	0.689261							198	0	6.91793	0.944432	1.13644
	Bin 9	0.591837	0.970648	-0.311166	0.968898	0.618548							211.2	0	6.94287	0.979949	0.734082
	Bin 10	0.969388	0.977418	-0.239881	0.9648	0.630773							224.4	0	6.69703	0.943723	1.51717
	Bin 11	1.34694	0.976508	-0.251363	0.999489	0.358648							237.6	0	6.5891	0.970157	0.884904
	Bin 12	1.72449	NaN	NaN	NaN	NaN							250.8	0	6.62107	0.972491	0.696502
	Bin 13	2.10204	NaN	NaN	NaN	NaN							264	0	6.49145	0.960735	0.729483
	Bin 14	2.47959	NaN	NaN	NaN	NaN							277.2	0	6.60967	0.96413	0.716359
	Bin 15	2.85714	NaN	NaN	NaN	NaN							290.4	0	6.57377	0.971749	0.489503
	Bin 16	3.23469	NaN	NaN	NaN	NaN							303.6	0	6.65048	0.971074	0.424022
	Bin 17	3.61224	NaN	NaN	NaN	NaN							316.8	0	6.75443	0.970466	0.612084
	Bin 18	3.9898	NaN	NaN	NaN	NaN							330	0	6.79651	0.974739	0.547572
	Bin 19	4.36735	NaN	NaN	NaN	NaN
	Bin 20	4.7449	NaN	NaN	NaN	NaN						Target 13	-66	0	7.45542	0.976476	NaN
	Bin 21	5.12245	NaN	NaN	NaN	NaN							-52.8	0	7.50035	0.97708	0.623956
													-39.6	0	7.39494	0.971296	0.316356
Target 15	Bin 1	-2.42857	1.00314	0.0305862	1.00246	0.81266							-26.4	0	7.4778	0.977878	0.33263
	Bin 2	-2.05102	1.01396	0.155645	1.00154	0.777446							-13.2	0	7.44321	0.976958	0.354708
	Bin 3	-1.67347	1.00672	0.0733589	0.991192	1.54078							0	0	7.38667	0.973581	0.690515
	Bin 4	-1.29592	0.988036	-0.140901	1.00343	1.47526							13.2	1	7.4163	0.977689	0.26349
	Bin 5	-0.918367	0.994948	-0.0633557	0.981113	1.56335							26.4	1	7.37378	0.979172	0.489231
	Bin 6	-0.540816	0.995776	-0.0541442	0.999207	1.97322							39.6	1	7.41352	0.974146	0.352784
	Bin 7	-0.163265	0.990603	-0.110417	1.00051	1.54148							52.8	1	7.3415	0.963694	0.802314
	Bin 8	0.214286	0.994808	-0.0623908	0.998155	3.05728							66	1	7.36183	0.971588	0.686003
	Bin 9	0.591837	0.989276	-0.125516	1.0097	3.31852							79.2	1	7.27629	0.971147	0.46435
	Bin 10	0.969388	0.962123	-0.420742	0.982942	2.01406							92.4	1	7.22595	0.969608	0.405793
	Bin 11	1.34694	0.967067	-0.36816	0.954212	1.79304							105.6	1	7.23715	0.960679	0.327262
	Bin 12	1.72449	0.940736	-0.641518	1.01703	1.91422							118.8	1	7.24234	0.961221	0.648259
	Bin 13	2.10204	0.938651	-0.659206	1.02289	1.20281							132	1	7.22429	0.960236	0.576978
	Bin 14	2.47959	NaN	NaN	NaN	NaN							145.2	1	7.23954	0.95086	1.11171
	Bin 15	2.85714	NaN	NaN	NaN	NaN							158.4	0	7.34278	0.900168	1.19889
	Bin 16	3.23469	NaN	NaN	NaN	NaN							171.6	0	7.42248	0.94978	1.05906
	Bin 17	3.61224	NaN	NaN	NaN	NaN							184.8	0	7.29998	0.918583	1.03401
	Bin 18	3.9898	NaN	NaN	NaN	NaN							198	0	7.30069	0.915287	0.843347
	Bin 19	4.36735	NaN	NaN	NaN	NaN							211.2	0	7.32229	0.880855	0.565825
	Bin 20	4.7449	NaN	NaN	NaN	NaN							224.4	0	7.41921	0.874274	0.543674
	Bin 21	5.12245	NaN	NaN	NaN	NaN							237.6	0	7.50802	0.873125	0.743831
													250.8	0	7.45022	0.875131	0.52539
Target 16	Bin 1	-2.42857	NaN	NaN	NaN	NaN							264	0	7.59956	0.901939	0.236178
	Bin 2	-2.05102	NaN	NaN	NaN	NaN							277.2	0	7.5175	0.909729	0.569218
	Bin 3	-1.67347	NaN	NaN	NaN	NaN							290.4	0	7.6571	0.894631	0.598807
	Bin 4	-1.29592	NaN	NaN	NaN	NaN							303.6	0	7.63534	0.937597	0.261319
	Bin 5	-0.918367	1.00717	0.0859825	0.990916	NaN							316.8	0	7.58123	0.896057	0.0184031
	Bin 6	-0.540816	0.993282	-0.0748666	1.00492	1.70402							330	0	7.54393	0.931338	0.347181
	Bin 7	-0.163265	1.00068	0.00665407	1.00704	0.491261
	Bin 8	0.214286	0.971311	-0.313824	0.978419	0.578022						Target 14	-118.8	0	7.83104	0.962629	NaN
	Bin 9	0.591837	0.906357	-0.968784	0.892704	0.536604							-105.6	0	7.95137	0.963953	0.693775
	Bin 10	0.969388	0.931632	-0.726538	0.979316	1.0494							-92.4	0	7.97029	0.96615	0.542821
	Bin 11	1.34694	0.933748	-0.707403	1.00812	0.871728							-79.2	0	8.06079	0.967444	0.580691
	Bin 12	1.72449	NaN	NaN	NaN	NaN							-66	0	7.96922	0.960165	0.644813
	Bin 13	2.10204	NaN	NaN	NaN	NaN							-52.8	0	8.08608	0.958656	0.732333
	Bin 14	2.47959	NaN	NaN	NaN	NaN							-39.6	0	7.99812	0.946817	1.11012
	Bin 15	2.85714	NaN	NaN	NaN	NaN							-26.4	0	7.99378	0.928238	0.923539
	Bin 16	3.23469	NaN	NaN	NaN	NaN							-13.2	0	8.01887	0.924082	0.548937
	Bin 17	3.61224	NaN	NaN	NaN	NaN							0	0	8.03714	0.933359	0.513416
	Bin 18	3.9898	NaN	NaN	NaN	NaN							13.2	1	8.07744	0.931599	0.820792
	Bin 19	4.36735	NaN	NaN	NaN	NaN							26.4	1	8.06406	0.93119	0.805667
	Bin 20	4.7449	NaN	NaN	NaN	NaN							39.6	1	8.09546	0.932635	0.913491
	Bin 21	5.12245	NaN	NaN	NaN	NaN							52.8	1	8.09498	0.941959	0.505507
													66	1	8.01739	0.935174	0.588312
Target 17	Bin 1	-2.42857	NaN	NaN	NaN	NaN							79.2	1	8.05378	0.946098	0.403622
	Bin 2	-2.05102	NaN	NaN	NaN	NaN							92.4	1	8.02806	0.946847	0.470559
	Bin 3	-1.67347	NaN	NaN	NaN	NaN							105.6	1	7.99666	0.960202	0.641427
	Bin 4	-1.29592	NaN	NaN	NaN	NaN							118.8	1	8.00412	0.959759	0.882626
	Bin 5	-0.918367	1.0106	0.133401	1.05798	NaN							132	1	7.9948	0.963302	0.374456
	Bin 6	-0.540816	1.00061	0.0183938	1.00496	0.661251							145.2	1	7.97969	0.962728	0.485685
	Bin 7	-0.163265	0.992649	-0.0694255	0.985957	0.77276							158.4	1	7.98422	0.958961	0.479349
	Bin 8	0.214286	0.998884	-0.00141285	1.00699	0.378004							171.6	1	7.92466	0.951627	0.661359
	Bin 9	0.591837	1.00157	0.0298759	0.98952	0.424548							184.8	1	8.03052	0.96654	1.00825
	Bin 10	0.969388	1.00768	0.10081	0.939124	0.298635							198	1	8.02578	0.976342	1.19965
	Bin 11	1.34694	0.988276	-0.116488	0.922581	0.5635							211.2	1	7.98138	0.968496	0.943746
	Bin 12	1.72449	0.971423	-0.298493	0.928864	0.317371							224.4	1	7.92304	0.964845	0.172062
	Bin 13	2.10204	0.940171	-0.629516	0.966709	0.30164							237.6	1	7.96158	0.956938	0.4096
	Bin 14	2.47959	0.938506	-0.649275	1.0129	0.424258							250.8	1	7.84941	0.960894	0.391383
	Bin 15	2.85714	NaN	NaN	NaN	NaN							264	1	7.67074	0.914729	0.373453
	Bin 16	3.23469	NaN	NaN	NaN	NaN							277.2	1	7.57125	0.890164	0.716637
	Bin 17	3.61224	NaN	NaN	NaN	NaN							290.4	1	7.55266	0.891186	0.955928
	Bin 18	3.9898	NaN	NaN	NaN	NaN							303.6	1	7.67482	0.864131	0.797396
	Bin 19	4.36735	NaN	NaN	NaN	NaN							316.8	1	7.69711	0.86722	0.806723
	Bin 20	4.7449	NaN	NaN	NaN	NaN							330	1	7.58984	0.926917	0.902145
	Bin 21	5.12245	NaN	NaN	NaN	NaN							343.2	0	7.89696	0.902062	0.363029
													356.4	0	7.84475	0.888592	0.459819
Target 18	Bin 1	-2.42857	NaN	NaN	NaN	NaN							369.6	0	7.89158	0.904422	0.59784
	Bin 2	-2.05102	NaN	NaN	NaN	NaN							382.8	0	7.97001	0.90963	0.698394
	Bin 3	-1.67347	NaN	NaN	NaN	NaN							396	0	7.72908	0.915786	0.504459
	Bin 4	-1.29592	NaN	NaN	NaN	NaN							409.2	0	7.76328	0.929705	1.21676
	Bin 5	-0.918367	NaN	NaN	NaN	NaN							422.4	0	7.91555	0.934389	0.581422
	Bin 6	-0.540816	NaN	NaN	NaN	NaN							435.6	0	7.76838	0.932082	0.353085
	Bin 7	-0.163265	1.00558	0.0506984	0.968122	NaN							448.8	0	7.73078	0.940468	0.0825987
	Bin 8	0.214286	1.00539	0.0484855	0.944889	0.668746							462	0	7.86258	0.958642	0.472051
	Bin 9	0.591837	0.981817	-0.211598	0.943971	0.63445							475.2	0	7.84128	0.94755	0.521295
	Bin 10	0.969388	0.957979	-0.469901	0.879438	0.609898
	Bin 11	1.34694	NaN	NaN	NaN	NaN						Target 15	-211.2	0	8.03797	0.978366	NaN
	Bin 12	1.72449	NaN	NaN	NaN	NaN							-198	0	7.98368	0.94787	0.690679
	Bin 13	2.10204	NaN	NaN	NaN	NaN							-184.8	0	8.1499	0.974201	0.934641
	Bin 14	2.47959	NaN	NaN	NaN	NaN							-171.6	0	8.25667	0.951488	0.425531
	Bin 15	2.85714	NaN	NaN	NaN	NaN							-158.4	0	8.10674	0.955564	0.99136
	Bin 16	3.23469	NaN	NaN	NaN	NaN							-145.2	0	8.09815	0.973413	0.915447
	Bin 17	3.61224	NaN	NaN	NaN	NaN							-132	0	7.96869	0.93259	1.96805
	Bin 18	3.9898	NaN	NaN	NaN	NaN							-118.8	0	8.22246	0.967882	1.11352
	Bin 19	4.36735	NaN	NaN	NaN	NaN							-105.6	0	7.91788	0.941645	1.9686
	Bin 20	4.7449	NaN	NaN	NaN	NaN							-92.4	0	7.96686	0.977288	1.77606
	Bin 21	5.12245	NaN	NaN	NaN	NaN							-79.2	0	7.95134	0.966966	0.681103
													-66	0	8.03785	0.945654	1.85415
Target 19	Bin 1	-2.42857	NaN	NaN	NaN	NaN							-52.8	0	7.94414	0.964909	0.502619
	Bin 2	-2.05102	NaN	NaN	NaN	NaN							-39.6	0	8.02083	0.911157	2.3333
	Bin 3	-1.67347	NaN	NaN	NaN	NaN							-26.4	0	8.03807	0.938698	2.17684
	Bin 4	-1.29592	NaN	NaN	NaN	NaN							-13.2	0	7.97713	0.97714	1.7696
	Bin 5	-0.918367	NaN	NaN	NaN	NaN							0	0	8.08668	0.9759	0.478592
	Bin 6	-0.540816	NaN	NaN	NaN	NaN							13.2	1	7.98322	0.975506	1.14766
	Bin 7	-0.163265	0.992205	-0.130576	1.00411	NaN							26.4	1	7.8281	0.926091	2.99819
	Bin 8	0.214286	0.986172	-0.197528	1.00919	0.619645							39.6	1	8.09558	0.972264	3.28259
	Bin 9	0.591837	0.977287	-0.293561	1.01691	0.882391							52.8	1	8.08386	0.932296	3.05236
	Bin 10	0.969388	0.949402	-0.584883	1.00509	0.841197							66	1	7.82002	0.966172	2.83689
	Bin 11	1.34694	0.881367	-1.22285	1.01136	0.514517							79.2	1	7.85774	0.960539	2.83388
	Bin 12	1.72449	0.830575	-1.64792	1.00415	0.451115							92.4	1	8.05293	0.975418	3.80316
	Bin 13	2.10204	NaN	NaN	NaN	NaN							105.6	1	7.68873	0.950543	2.71978
	Bin 14	2.47959	NaN	NaN	NaN	NaN							118.8	0	7.69892	0.953531	2.41794
	Bin 15	2.85714	NaN	NaN	NaN	NaN							132	0	7.8233	0.922906	0.904478
	Bin 16	3.23469	NaN	NaN	NaN	NaN							145.2	0	7.82412	0.940126	1.92594
	Bin 17	3.61224	NaN	NaN	NaN	NaN							158.4	0	7.83018	0.903637	1.27408
	Bin 18	3.9898	NaN	NaN	NaN	NaN							171.6	0	7.67592	0.900589	2.17911
	Bin 19	4.36735	NaN	NaN	NaN	NaN							184.8	0	7.59973	0.965596	1.93573
	Bin 20	4.7449	NaN	NaN	NaN	NaN							198	0	7.53027	0.984415	1.89271
	Bin 21	5.12245	NaN	NaN	NaN	NaN							211.2	0	7.72548	0.981008	1.3295
													224.4	0	7.54837	0.976795	1.36833
Target 20	Bin 1	-2.42857	NaN	NaN	NaN	NaN							237.6	0	7.37084	0.984057	0.910615
	Bin 2	-2.05102	NaN	NaN	NaN	NaN
	Bin 3	-1.67347	NaN	NaN	NaN	NaN						Target 16	-132	0	7.25849	0.947118	NaN
	Bin 4	-1.29592	NaN	NaN	NaN	NaN							-118.8	0	7.60581	0.970843	3.58829
	Bin 5	-0.918367	1.00908	0.0819568	1.01648	NaN							-105.6	0	7.59514	0.956286	2.59831
	Bin 6	-0.540816	1.00155	0.00825503	0.984495	1.49308							-92.4	0	7.49747	0.972734	2.00688
	Bin 7	-0.163265	0.998398	-0.0393596	1.01958	2.21304							-79.2	0	7.25983	0.966268	0.942735
	Bin 8	0.214286	1.00557	0.0418939	1.01595	0.723172							-66	0	7.15456	0.963661	2.31332
	Bin 9	0.591837	0.960336	-0.451537	0.974091	0.885081							-52.8	0	7.32324	0.972003	2.231
	Bin 10	0.969388	0.962794	-0.427985	1.0054	0.722861							-39.6	0	7.32685	0.979867	0.337755
	Bin 11	1.34694	0.951723	-0.542536	1.01949	1.14461							-26.4	0	7.47599	0.981999	1.41304
	Bin 12	1.72449	0.954214	-0.517138	0.989981	1.09565							-13.2	0	7.42306	0.983745	2.22497
	Bin 13	2.10204	0.943108	-0.630123	1.02776	0.348168							0	0	7.35503	0.98402	0.492441
	Bin 14	2.47959	0.925992	-0.800031	1.01895	0.429341							13.2	1	7.4092	0.979151	0.330208
	Bin 15	2.85714	0.908931	-0.962079	1.01003	0.398446							26.4	1	7.44629	0.981638	0.791071
	Bin 16	3.23469	0.90713	-0.97971	0.984252	0.281666							39.6	1	7.37101	0.968441	0.351323
	Bin 17	3.61224	0.888668	-1.14842	0.939435	0.294258							52.8	1	7.35707	0.967025	0.605639
	Bin 18	3.9898	0.88404	-1.18877	0.972758	0.394118							66	1	7.34363	0.955301	0.191225
	Bin 19	4.36735	0.882666	-1.20183	1.01644	0.249602							79.2	1	7.16531	0.950482	0.41995
	Bin 20	4.7449	NaN	NaN	NaN	NaN							92.4	1	7.09337	0.941865	0.896332
	Bin 21	5.12245	NaN	NaN	NaN	NaN							105.6	1	6.93242	0.937871	0.776963
													118.8	1	6.89072	0.917529	0.686611
Target 21	Bin 1	-2.42857	NaN	NaN	NaN	NaN							132	1	6.69792	0.896507	0.677841
	Bin 2	-2.05102	1.00319	0.0552438	0.993631	NaN							145.2	1	6.65331	0.838473	0.227732
	Bin 3	-1.67347	0.982044	-0.183687	1.01819	1.1862							158.4	1	6.55137	0.816447	0.55423
	Bin 4	-1.29592	0.997403	-0.00539681	0.98199	1.82409							171.6	1	6.76523	0.922565	1.51636
	Bin 5	-0.918367	0.996162	-0.0251537	1.00205	2.5956							184.8	0	6.78452	0.917806	1.34378
	Bin 6	-0.540816	1.01262	0.167225	0.999815	5.32731							198	0	6.89147	0.954912	1.10173
	Bin 7	-0.163265	1.02527	0.31507	0.996739	1.37078							211.2	0	7.00087	0.98418	0.147743
	Bin 8	0.214286	1.01432	0.184696	0.98826	1.4969							224.4	0	6.98351	0.97744	1.13741
	Bin 9	0.591837	0.988292	-0.113486	0.98874	1.66893							237.6	0	6.90076	0.979363	0.871728
	Bin 10	0.969388	0.973132	-0.28135	0.994298	0.833537
	Bin 11	1.34694	0.975936	-0.249711	0.984629	0.841673						Target 17	-105.6	0	8.78636	0.942251	NaN
	Bin 12	1.72449	0.973966	-0.272366	0.959812	1.49484							-92.4	0	8.65079	0.879937	1.03072
	Bin 13	2.10204	0.972671	-0.286344	0.966583	1.62929							-79.2	0	8.62566	0.891181	0.917706
	Bin 14	2.47959	0.945051	-0.577126	1.0205	0.906653							-66	0	8.71462	0.938538	0.39991
	Bin 15	2.85714	0.908965	-0.932519	0.89624	0.846581							-52.8	0	8.77862	0.860621	0.13171
	Bin 16	3.23469	0.923485	-0.792897	1.03969	0.359049							-39.6	0	8.7771	0.921779	0.848537
	Bin 17	3.61224	0.914599	-0.878762	1.03306	0.252409							-26.4	0	8.64984	0.878126	0.638928
	Bin 18	3.9898	0.893456	-1.07639	1.03876	0.2627							-13.2	0	8.76105	0.819496	0.302514
	Bin 19	4.36735	0.891209	-1.09709	1.03233	0.194927							0	0	8.41604	0.866511	0.583693
	Bin 20	4.7449	0.890255	-1.106	0.981055	0.419991							13.2	1	8.78155	0.907693	1.37265
	Bin 21	5.12245	0.875272	-1.23976	0.978522	0.344132							26.4	1	8.73516	0.885015	0.656216
													39.6	1	8.46261	0.883108	1.17616
Target 22	Bin 1	-2.42857	NaN	NaN	NaN	NaN							52.8	1	8.62511	0.906814	0.545318
	Bin 2	-2.05102	NaN	NaN	NaN	NaN							66	1	8.72935	0.921458	0.415877
	Bin 3	-1.67347	NaN	NaN	NaN	NaN							79.2	1	8.74748	0.899259	0.533713
	Bin 4	-1.29592	NaN	NaN	NaN	NaN							92.4	1	8.71259	0.909548	0.381358
	Bin 5	-0.918367	NaN	NaN	NaN	NaN							105.6	1	8.58052	0.875493	0.523
	Bin 6	-0.540816	1.00751	0.159292	0.978302	NaN							118.8	1	8.67092	0.890383	0.291934
	Bin 7	-0.163265	1.00091	0.0845997	1.01394	1.43783							132	1	8.6659	0.884915	0.122144
	Bin 8	0.214286	1.00684	0.15238	1.01093	0.743364							145.2	1	8.58409	0.857695	0.174358
	Bin 9	0.591837	0.961909	-0.352186	0.942074	0.512345							158.4	1	8.73965	0.901279	0.324085
	Bin 10	0.969388	0.934923	-0.632965	0.858242	1.27201							171.6	1	8.62737	0.853393	0.534889
	Bin 11	1.34694	0.929212	-0.692894	0.824869	0.738726							184.8	1	8.78304	0.908076	0.595078
	Bin 12	1.72449	0.88968	-1.07257	0.948856	0.324488							198	1	8.81097	0.909202	0.431646
	Bin 13	2.10204	0.808207	-1.75507	0.885843	0.230682							211.2	1	8.7019	0.858032	0.487233
	Bin 14	2.47959	0.772651	-2.01409	0.956331	0.328521							224.4	1	8.8027	0.870757	0.310221
	Bin 15	2.85714	0.761714	-2.0885	0.95493	0.204563							237.6	0	8.86749	0.886275	0.162102
	Bin 16	3.23469	0.773579	-2.00776	0.959488	0.480241							250.8	0	8.62635	0.854337	0.124745
	Bin 17	3.61224	0.761002	-2.09346	0.961202	0.204739							264	0	8.79212	0.740628	0.449923
	Bin 18	3.9898	0.749801	-2.16781	0.952434	0.307434							277.2	0	8.8464	0.824019	0.32825
	Bin 19	4.36735	0.750254	-2.16497	0.911392	0.302833							290.4	0	8.63063	0.842366	0.41657
	Bin 20	4.7449	0.74487	-2.20002	0.843706	0.161222							303.6	0	8.70623	0.848429	0.391725
	Bin 21	5.12245	NaN	NaN	NaN	NaN							316.8	0	8.4503	0.798957	0.646569
													330	0	8.44548	0.792419	0.550627
Target 23	Bin 1	-2.42857	NaN	NaN	NaN	NaN							343.2	0	8.349	0.786966	0.539272
	Bin 2	-2.05102	NaN	NaN	NaN	NaN							356.4	0	8.84506	0.809603	0.785551
	Bin 3	-1.67347	NaN	NaN	NaN	NaN							369.6	0	8.75731	0.893605	0.467253
	Bin 4	-1.29592	NaN	NaN	NaN	NaN							382.8	0	8.62425	0.893874	0.296311
	Bin 5	-0.918367	NaN	NaN	NaN	NaN							396	0	8.25683	0.805669	0.374526
	Bin 6	-0.540816	NaN	NaN	NaN	NaN							409.2	0	8.22066	0.82114	0.0802125
	Bin 7	-0.163265	1.00276	0.00824416	1.01235	NaN							422.4	0	8.18305	0.807162	0.279022
	Bin 8	0.214286	0.975946	-0.289783	0.987461	0.653274							435.6	0	8.79139	0.797047	0.582067
	Bin 9	0.591837	0.956427	-0.496571	0.997227	0.327505							448.8	0	8.59808	0.838662	0.292088
	Bin 10	0.969388	0.96555	-0.398586	0.961289	0.358696							462	0	8.25624	0.828062	0.187307
	Bin 11	1.34694	NaN	NaN	NaN	NaN							475.2	0	7.89629	0.767869	0.460681
	Bin 12	1.72449	NaN	NaN	NaN	NaN							488.4	0	8.31119	0.894759	0.398837
	Bin 13	2.10204	NaN	NaN	NaN	NaN							501.6	0	8.27159	0.927953	0.317137
	Bin 14	2.47959	NaN	NaN	NaN	NaN							514.8	0	8.28748	0.888107	0.268164
	Bin 15	2.85714	NaN	NaN	NaN	NaN							528	0	8.02121	0.859034	0.177715
	Bin 16	3.23469	NaN	NaN	NaN	NaN							541.2	0	8.22132	0.881713	0.256313
	Bin 17	3.61224	NaN	NaN	NaN	NaN							554.4	0	8.09772	0.9225	0.592203
	Bin 18	3.9898	NaN	NaN	NaN	NaN
	Bin 19	4.36735	NaN	NaN	NaN	NaN						Target 18	0	0	8.96073	0.971182	NaN
	Bin 20	4.7449	NaN	NaN	NaN	NaN							13.2	1	8.93944	0.964437	0.991712
	Bin 21	5.12245	NaN	NaN	NaN	NaN							26.4	1	9.00649	0.964977	1.12985
													39.6	1	9.11155	0.886625	0.889538
													52.8	1	8.9818	0.897567	0.915797
													66	1	8.95704	0.912046	0.851018
													79.2	1	9.01093	0.928677	0.776462
													92.4	1	9.12711	0.917981	0.686991
													105.6	1	8.94853	0.905369	0.903124
													118.8	1	8.97383	0.915669	0.249952
													132	1	8.9819	0.902514	0.544846
													145.2	1	8.98897	0.919048	0.668829
													158.4	1	8.95116	0.91688	0.446185
													171.6	1	8.93649	0.931308	0.707902
													184.8	1	8.90499	0.934548	0.81861
													198	1	8.85875	0.924144	0.405043
													211.2	1	8.61187	0.888714	0.387233
													224.4	1	8.46082	0.885913	1.04173
													237.6	1	8.44233	0.884367	0.764934
													250.8	0	8.62854	0.823571	0.635789
													264	0	8.6511	0.845447	0.428971
												Target 19	0	0	8.31859	0.977132	NaN
													13.2	1	8.25403	0.937105	1.3543
													26.4	1	8.21813	0.977472	0.40426
													39.6	1	8.13198	0.967548	0.318156
													52.8	1	8.18585	0.945987	0.356931
													66	1	8.19744	0.971239	0.56432
													79.2	1	8.16947	0.981615	0.418707
													92.4	1	8.15607	0.980561	0.403953
													105.6	1	8.11507	0.97351	0.910336
													118.8	1	8.22057	0.922633	0.80091
													132	1	8.16892	0.967824	0.528819
													145.2	1	8.16165	0.975084	0.850688
													158.4	1	8.05895	0.967839	1.00172
													171.6	1	8.1035	0.980609	0.837356
													184.8	1	7.99748	0.975155	1.19337
													198	1	7.95975	0.964111	1.64537
													211.2	0	7.8668	0.964496	1.10245
													224.4	0	7.93083	0.975529	0.493427
													237.6	0	7.84182	0.976328	0.220333
													250.8	0	7.736	0.929467	0.744399
													264	0	7.5696	0.960453	0.495491
													277.2	0	7.48942	0.96804	0.477292
													290.4	0	7.36953	0.977907	0.341851
													303.6	0	7.27045	0.973934	0.615247
													316.8	0	7.11079	0.959817	0.583568
													330	0	7.00988	0.967789	0.573651
													343.2	0	6.89153	0.957678	0.601869
													356.4	0	6.88798	0.965989	0.504454
													369.6	0	6.86771	0.959598	0.247022
												Target 20	-52.8	0	8.30952	0.935686	NaN
													-39.6	0	8.2526	0.979357	1.09055
													-26.4	0	8.57994	0.839677	1.98019
													-13.2	0	7.91006	0.899707	1.4085
													0	0	8.17265	0.895031	1.773
													13.2	1	8.18383	0.973661	2.75662
													26.4	1	8.30825	0.946926	2.10951
													39.6	1	8.30671	0.935054	1.10297
													52.8	1	8.32711	0.955616	0.177855
													66	1	8.25717	0.88274	0.822947
													79.2	1	8.23163	0.967397	0.78891
													92.4	1	8.07691	0.947891	0.616965
													105.6	1	7.82592	0.815946	0.886279
													118.8	1	7.82161	0.926175	1.152
													132	1	7.95581	0.853704	1.17312
													145.2	0	7.89598	0.934849	0.854236
													158.4	0	7.94532	0.950731	0.468562
													171.6	0	7.91643	0.962685	0.395523
													184.8	0	7.91795	0.967738	1.25474
													198	0	7.80677	0.947382	1.52175
													211.2	0	7.78693	0.900262	0.657352
													224.4	0	7.91241	0.907287	1.21025
													237.6	0	7.85115	0.911026	1.4457
													250.8	0	7.80963	0.915578	0.631015
													264	0	7.81788	0.936875	0.563982
													277.2	0	7.82425	0.93567	0.394574
													290.4	0	7.74987	0.962719	0.249991
													303.6	0	7.67309	0.949026	0.184125
													316.8	0	7.64863	0.934055	0.380054
													330	0	7.64137	0.934401	0.288562
													343.2	0	7.58598	0.945423	0.619408
													356.4	0	7.55769	0.949255	0.503882
													369.6	0	7.52511	0.927073	0.658635
													382.8	0	7.36093	0.909216	0.261674
													396	0	7.49561	0.933478	0.169592
													409.2	0	7.48305	0.899163	0.350223
													422.4	0	7.48229	0.91806	0.265259
													435.6	0	7.44467	0.900847	0.229517
													448.8	0	7.34266	0.874845	0.272086
													462	0	7.29505	0.840159	0.229164
													475.2	0	7.31621	0.879302	0.381525
													488.4	0	7.37647	0.908777	0.475219
													501.6	0	7.20662	0.882659	0.278196
													514.8	0	7.19812	0.860358	0.138812
													528	0	7.33825	0.929979	0.684245
													541.2	0	7.26855	0.935652	0.249602
												Target 21	-145.2	0	8.23654	0.96439	NaN
													-132	0	8.13079	0.879916	1.03864
													-118.8	0	8.01239	0.914182	1.34783
													-105.6	0	8.04954	0.96173	1.21189
													-92.4	0	7.97164	0.95892	0.998874
													-79.2	0	8.32552	0.879713	2.21843
													-66	0	7.94744	0.942985	1.42975
													-52.8	0	8.18	0.927753	2.21295
													-39.6	0	8.07272	0.932173	2.97825
													-26.4	0	8.08537	0.929577	4.06777
													-13.2	0	8.36493	0.914304	6.39358
													0	0	8.33155	0.939795	5.52058
													13.2	1	8.34126	0.919383	1.30273
													26.4	1	8.38638	0.93069	1.43884
													39.6	1	8.24617	0.909398	0.915827
													52.8	1	8.30284	0.924937	2.07797
													66	1	8.13541	0.93137	1.37321
													79.2	1	7.98891	0.903856	1.96464
													92.4	1	7.96021	0.926185	1.19579
													105.6	0	7.94462	0.917472	0.627296
													118.8	0	7.91063	0.924658	0.677526
													132	0	7.87652	0.913653	0.662882
													145.2	0	8.0462	0.913943	1.02046
													158.4	0	7.94207	0.886794	1.22062
													171.6	0	7.94851	0.894739	1.76906
													184.8	0	7.91392	0.885739	1.54451
													198	0	7.95554	0.908362	1.71406
													211.2	0	7.75675	0.936195	1.13556
													224.4	0	7.69299	0.955241	0.955243
													237.6	0	7.67849	0.949827	0.629159
													250.8	0	7.39819	0.81554	1.02271
													264	0	7.43188	0.847995	0.670455
													277.2	0	7.55091	0.961619	0.404925
													290.4	0	7.51605	0.96817	0.313174
													303.6	0	7.49229	0.961076	0.303216
													316.8	0	7.4297	0.956421	0.201602
													330	0	7.35707	0.966413	0.139804
													343.2	0	7.28522	0.965194	0.266111
													356.4	0	7.22327	0.960492	0.382186
													369.6	0	7.31061	0.962995	0.112042
													382.8	0	7.22977	0.953147	0.277813
													396	0	7.27275	0.894757	0.52539
													409.2	0	7.25205	0.926206	0.314591
													422.4	0	7.13724	0.88526	0.295528
													435.6	0	7.14311	0.931	0.392737
													448.8	0	7.17089	0.949237	0.259757
												Target 22	-13.2	0	7.6455	0.914284	NaN
													0	0	7.43467	0.958906	2.05985
													13.2	1	7.68542	0.930496	1.20272
													26.4	1	7.66615	0.953381	1.05091
													39.6	1	7.71165	0.945468	1.46333
													52.8	1	7.69714	0.952621	0.384142
													66	1	7.55045	0.944342	0.588272
													79.2	1	7.60263	0.936676	0.537708
													92.4	1	7.44059	0.895735	0.920235
													105.6	1	7.26811	0.893547	0.361763
													118.8	1	7.18972	0.851996	0.255036
													132	1	7.00455	0.835939	1.39113
													145.2	0	6.99595	0.791535	2.01902
													158.4	0	7.05906	0.768819	1.07916
													171.6	0	7.31919	0.812029	0.598721
													184.8	0	7.15432	0.761102	0.90871
													198	0	6.99864	0.766749	0.60469
													211.2	0	7.00109	0.784822	0.702777
													224.4	0	6.81736	0.90199	0.556724
													237.6	0	6.79695	0.892094	0.30963
													250.8	0	6.63978	0.866211	0.107111
													264	0	6.26819	0.837769	0.191451
													277.2	0	6.13297	0.838408	0.243354
													290.4	0	6.06056	0.769553	0.214276
													303.6	0	6.07068	0.865773	0.273649
													316.8	0	5.90775	0.885741	0.578097
													330	0	5.84298	0.889769	0.197849
													343.2	0	5.83912	0.905743	0.209618
													356.4	0	5.80801	0.919671	0.200336
													369.6	0	5.71362	0.892227	0.176842
													382.8	0	5.74015	0.890103	0.0595982
													396	0	5.85939	0.867765	0.381476
													409.2	0	5.88367	0.916865	0.586613
													422.4	0	5.87717	0.89123	0.42948
													435.6	0	5.85015	0.882008	0.424629
													448.8	0	5.71016	0.893216	0.26463
													462	0	5.81992	0.875613	0.136336
													475.2	0	5.79457	0.926078	0.213252
													488.4	0	5.6823	0.901368	0.332211
													501.6	0	5.74927	0.89754	0.19203
													514.8	0	5.64268	0.88561	0.374111
													528	0	5.6853	0.875916	0.331383
													541.2	0	5.66118	0.847119	0.353958
													554.4	0	5.72507	0.86525	0.328545
													567.6	0	5.69374	0.842888	0.225996
													580.8	0	5.65247	0.788495	0.161222
												Target 23	-26.4	0	7.94173	0.97229	NaN
													-13.2	0	7.73326	0.924192	0.804292
													0	0	7.95884	0.972892	1.09874
													13.2	1	7.81456	0.881386	2.78982
													26.4	1	7.94698	0.977599	1.60094
													39.6	1	7.94675	0.95257	1.65248
													52.8	1	8.06279	0.978913	1.70737
													66	1	7.90746	0.929135	1.95652
													79.2	1	7.81091	0.934172	0.558699
													92.4	1	7.8476	0.974754	1.38735
													105.6	1	7.7509	0.944096	1.29768
													118.8	1	7.58387	0.892413	0.518307
													132	1	7.58644	0.850265	1.52764
													145.2	1	7.66806	0.916103	0.330916
													158.4	1	7.71069	0.872082	0.567525
													171.6	1	7.77261	0.948315	0.960086
													184.8	1	7.75982	0.962557	0.892668
													198	1	7.74415	0.923794	0.679964
													211.2	1	7.68788	0.948244	0.476433
													224.4	1	7.71655	0.957394	0.614153
													237.6	1	7.73286	0.960964	0.715447
													250.8	1	7.6526	0.957606	0.504803
													264	1	7.57323	0.948318	0.417086
													277.2	1	7.55999	0.899063	0.287527
													290.4	1	7.49714	0.900416	0.382621
													303.6	1	7.54917	0.94827	0.360549
													316.8	1	7.59544	0.942873	0.334863
													330	1	7.47071	0.937338	0.288588
													343.2	1	7.44076	0.941861	0.299658
													356.4	1	7.48453	0.950936	0.34389
													369.6	1	7.55102	0.942114	0.24748
													382.8	1	7.55508	0.942602	0.211433
													396	1	7.63556	0.952666	0.169317
													409.2	1	7.5126	0.958152	0.362678
													422.4	1	7.49471	0.946807	0.385044
													435.6	1	7.52063	0.941335	0.363767
													448.8	1	7.44645	0.850796	0.507676
													462	1	7.36343	0.856579	0.52829
													475.2	1	7.46234	0.900322	0.411331
													488.4	0	7.65251	0.892856	0.179392
													501.6	0	7.65959	0.881653	0.208779
													514.8	0	7.73909	0.951373	0.231957
													528	0	7.67054	0.925564	0.592426

## Sheet: 1 - S2c 6.5 kPa
		Mean radial deviation per bin (mm)																															Mean curvature deviation per bin (mm^-1)
	bin index	1	2	3	4	5	6	7	8	9	10	11	12	13	14	15	16	17	18	19	20	21	22	23	24	25	26	27	28	29	30		1	2	3	4	5	6	7	8	9	10	11	12	13	14	15	16	17
	normalized cup position of bin centre	0.0166667	0.05	0.0833333	0.116667	0.15	0.183333	0.216667	0.25	0.283333	0.316667	0.35	0.383333	0.416667	0.45	0.483333	0.516667	0.55	0.583333	0.616667	0.65	0.683333	0.716667	0.75	0.783333	0.816667	0.85	0.883333	0.916667	0.95	0.983333		0.0166667	0.05	0.0833333	0.116667	0.15	0.183333	0.216667	0.25	0.283333	0.316667	0.35	0.383333	0.416667	0.45	0.483333	0.516667	0.55
	Rows correspond to individual particles	3.87512	3.8392	3.81821	3.81045	3.79904	3.77298	3.74928	3.7351	3.72874	3.74257	3.75942	3.76072	3.76462	3.76261	3.75759	3.75716	3.75258	3.74985	3.75464	3.7571	3.76014	3.76212	3.77405	3.77781	3.78515	3.79193	3.78743	3.78768	3.81027	3.84004		0.0348206	-0.00448013	-0.00947788	0.0304207	0.03221	0.00348667	-0.0325037	-0.057572	-0.0561356	-0.0154312	0.0131482	0.022643	0.0180451	0.00984513	0.00128133	-0.00742949	-0.0130623
		4.13749	4.08558	4.09192	4.09939	4.09184	4.09018	4.08805	4.08551	4.09157	4.09161	4.09036	4.08975	4.08344	4.07794	4.0735	4.06805	4.07519	4.07409	4.07222	4.07145	4.06764	4.06905	4.07177	4.07175	4.07899	4.08513	4.09525	4.10207	4.1146	4.12982		0.0416215	-0.0435344	-0.0018552	0.0173601	-0.00450299	-0.0101182	-0.00844816	-0.00950143	-1.57745e-05	0.00910208	0.0119155	0.00842837	-0.00260111	-0.00958128	-0.011459	-0.0126907	-0.00236128
		4.38922	4.38391	4.37011	4.35118	4.33364	4.31748	4.30311	4.29514	4.29551	4.29419	4.30126	4.31605	4.32314	4.33171	4.33576	4.34117	4.3444	4.35374	4.35115	4.34807	4.34281	4.33961	4.33431	4.33339	4.33363	4.33223	4.32658	4.32657	4.3331	4.33514		0.00437997	0.0130762	0.0140371	0.00889949	0.00501896	-0.00525193	-0.0136423	-0.0171824	-0.0212327	-0.0267376	-0.0175789	0.000568788	0.00952405	0.00933804	-0.00158695	0.00143971	0.0064449
		3.71893	3.75181	3.77509	3.78534	3.79163	3.79507	3.8019	3.81502	3.82003	3.8265	3.83015	3.83408	3.83422	3.83917	3.83595	3.84194	3.83491	3.82723	3.82152	3.8172	3.81119	3.80332	3.7962	3.78979	3.78308	3.77499	3.77169	3.77061	3.76351	3.76304		-0.020374	-0.00513758	0.0112366	0.0138482	-0.00127104	-0.0134567	-0.0105393	-0.000735458	0.0082006	0.0102661	0.00586749	0.00452001	-0.000797795	0.00666989	0.00870014	0.0157745	0.0114405
		3.83939	3.83814	3.83554	3.82157	3.81357	3.80674	3.80547	3.80492	3.79953	3.79863	3.79312	3.79043	3.79107	3.79203	3.79966	3.80534	3.80635	3.80628	3.81024	3.80862	3.80594	3.80207	3.8015	3.79881	3.80234	3.80248	3.79816	3.81687	3.83436	3.84556		0.00263012	0.00831004	0.0198655	0.00583218	-0.00343438	-0.00469228	-0.00425995	0.00421697	0.00484316	0.00402558	-0.00531533	-0.0127623	-0.0135079	-0.00949663	0.00457212	0.0107305	0.00951047
		3.61235	3.61685	3.62521	3.62279	3.62811	3.62891	3.62431	3.62821	3.62988	3.63035	3.63777	3.63551	3.63909	3.64329	3.6494	3.65509	3.65496	3.6509	3.64316	3.63465	3.62384	3.61952	3.6196	3.61328	3.62216	3.60692	3.60552	3.61018	3.61241	3.61235		-0.00636327	0.00352336	0.0098923	0.00051956	0.000541054	0.00260069	-0.00494414	-0.00782942	-0.00126207	-0.00557343	-0.0025589	-0.00791357	-0.00900108	0.000138653	0.012059	0.0219729	0.0205942
		4.10408	4.10128	4.08524	4.06437	4.05337	4.04322	4.03844	4.03853	4.03917	4.03575	4.03544	4.03415	4.03446	4.03552	4.03452	4.03434	4.03354	4.03561	4.0385	4.04251	4.04739	4.05172	4.05418	4.0588	4.06488	4.07029	4.07239	4.07772	4.06679	4.07391		0.00426869	0.0250013	0.0103383	1.9604e-05	-0.00791908	-0.0133003	-0.00868717	-0.000270272	0.00563543	0.00274462	-0.00204456	-0.00253813	0.00160954	0.00550521	0.00243298	-0.00270709	-0.00655687
		4.38139	4.37289	4.3595	4.33881	4.31609	4.30179	4.30061	4.31265	4.31347	4.32235	4.32922	4.33155	4.33072	4.33053	4.33033	4.33	4.32804	4.3261	4.32068	4.31606	4.31496	4.31224	4.29991	4.2919	4.28191	4.29719	4.31667	4.36027	4.3967	4.45948		0.0122592	0.00811999	0.0184146	0.0116729	-0.0139985	-0.0325917	-0.0286723	-0.00545053	-0.00130879	0.00443959	0.0105137	0.010576	0.00386082	-0.00133633	0.000940361	0.00522765	0.00630517
		3.73158	3.72154	3.70565	3.71227	3.70683	3.69582	3.69094	3.68186	3.66779	3.64615	3.62729	3.6134	3.58473	3.57336	3.57609	3.57644	3.58172	3.60173	3.61989	3.6294	3.64456	3.66191	3.67074	3.67294	3.68024	3.70029	3.7048	3.71189	3.71786	3.73662		0.0103019	-0.000824902	-0.0173433	0.0121795	0.0112599	0.00830985	0.0170137	0.0224265	0.0236818	0.0206341	0.00441791	-0.0189483	-0.0344436	-0.0507238	-0.0518857	-0.0425672	-0.024683
		4.10481	4.10092	4.11844	4.11149	4.10225	4.0949	4.08955	4.09479	4.09442	4.08222	4.0836	4.07101	4.06958	4.07679	4.09021	4.09607	4.10235	4.1105	4.115	4.11413	4.11	4.09984	4.10247	4.09134	4.09907	4.08598	4.086	4.08092	4.0848	4.10307		0.00520247	-0.0121333	0.0187437	0.0238047	0.00580766	-0.0136092	-0.00705345	0.00794059	0.0168221	0.0115639	-0.00617203	-0.0253817	-0.0236784	-0.0157223	-0.00485551	0.00393919	0.0089234
		3.82216	3.82934	3.81392	3.79659	3.77312	3.75809	3.74997	3.75642	3.74889	3.74298	3.73546	3.73833	3.737	3.73378	3.74659	3.75703	3.75961	3.77445	3.783	3.78601	3.79448	3.79123	3.79349	3.78946	3.78668	3.78907	3.78505	3.77711	3.76229	3.73489		-0.00421393	0.0408271	0.0274139	0.00530123	-0.0113308	-0.0175064	-0.00843977	0.00166076	0.00613165	-0.000439389	-0.0112019	-0.0153792	-0.0233955	-0.0186966	-0.0138318	-0.0046387	-0.000909368
		4.12957	4.09102	4.06436	4.0369	4.01463	3.99716	3.98182	3.96686	3.95591	3.94952	3.94443	3.9439	3.94687	3.95497	3.96296	3.97016	3.98166	3.99006	3.99656	4.00253	4.00742	4.0121	4.01343	4.01419	4.01266	4.01319	4.0125	4.02118	4.0318	4.03314		0.0265541	0.017075	0.00981923	0.00588086	0.000287993	-0.00140177	0.000729867	-0.00727355	-0.00918914	-0.0156542	-0.0168364	-0.0197269	-0.01624	-0.00900385	-0.00493001	0.00119961	0.00836118
		4.28871	4.25927	4.2578	4.25523	4.25408	4.25267	4.24607	4.2388	4.21276	4.19532	4.17786	4.17286	4.18377	4.19295	4.20623	4.22168	4.23063	4.23086	4.2321	4.23082	4.23134	4.235	4.23497	4.23305	4.23779	4.23941	4.2414	4.24722	4.25149	4.27154		0.0143818	-0.0121214	0.00170856	-0.00100424	0.00293726	0.0122151	0.0276465	0.0296663	0.0090104	-0.0218021	-0.0474437	-0.0480602	-0.0299529	-0.011907	0.00468392	0.0187045	0.0271107
		3.6243	3.63188	3.62627	3.6026	3.57286	3.53786	3.49815	3.46398	3.42983	3.40877	3.38779	3.37943	3.3741	3.37755	3.38196	3.39195	3.40145	3.41334	3.42873	3.44348	3.4618	3.47819	3.49449	3.5085	3.52262	3.53792	3.56681	3.59978	3.63062	3.65381		-0.0144199	0.0191379	0.0476234	0.0524865	0.0431733	0.029084	0.00939478	-0.0184181	-0.0272658	-0.0305369	-0.0363211	-0.0385017	-0.0313869	-0.0212982	-0.0144555	-0.00846025	-0.00469471
		3.78092	3.76538	3.75149	3.74164	3.72902	3.71405	3.69362	3.67192	3.65331	3.6335	3.61404	3.58978	3.56739	3.54566	3.52882	3.51477	3.51397	3.52928	3.55912	3.58977	3.61859	3.65357	3.67287	3.69183	3.71013	3.72958	3.73623	3.75445	3.76833	3.76362		0.00888639	-0.00275938	-0.00181548	0.00734447	0.018726	0.0180124	0.0116041	0.00993186	0.00400781	0.0108392	0.0128799	0.0102091	-0.00649712	-0.0268915	-0.0498809	-0.0763576	-0.084559
		4.39033	4.35023	4.37091	4.37808	4.37986	4.37325	4.37709	4.38268	4.38297	4.39051	4.39071	4.37711	4.37197	4.35231	4.33805	4.31839	4.30014	4.2887	4.28251	4.30198	4.32026	4.33393	4.35577	4.37589	4.38572	4.40118	4.40066	4.39844	4.39763	4.38289		0.0313389	-0.0364041	-0.00516615	0.0153645	0.00280738	-0.0119401	-0.0094474	-0.00753256	0.00558519	0.0145792	0.0237373	0.0174696	0.017809	0.012693	0.00641176	-0.0106346	-0.031911
		3.85265	3.89444	3.92509	3.94249	3.9475	3.95453	3.94843	3.92397	3.90964	3.88665	3.86306	3.84061	3.8148	3.77841	3.75362	3.73601	3.70168	3.68333	3.67281	3.68169	3.72056	3.76891	3.81778	3.86954	3.91486	3.95748	3.99076	4.00615	4.03083	4.07944		-0.029539	-0.0173425	-8.82203e-05	0.00451096	0.017397	0.0342023	0.0406561	0.0276882	0.0112861	0.007043	0.0137007	0.0113007	0.00633363	-0.00162758	-0.0120818	-0.0149266	-0.0314394
		3.28947	3.28998	3.28055	3.26863	3.25759	3.25624	3.23578	3.22948	3.20882	3.19208	3.17203	3.15208	3.12458	3.0989	3.07329	3.04804	3.03109	3.02006	3.01886	3.02567	3.05358	3.08747	3.12917	3.17884	3.23523	3.28475	3.33773	3.38207	3.42008	3.46227		-0.0063808	0.00860229	0.00215837	-0.00127507	0.000594314	0.0150641	0.0147453	0.0189719	0.0208778	0.0254012	0.0250227	0.0221593	0.00985289	0.000206388	-0.0154196	-0.038294	-0.059026
		3.85347	3.86704	3.88103	3.90161	3.91879	3.93306	3.93326	3.93547	3.93637	3.93904	3.93695	3.93852	3.94124	3.9358	3.93711	3.93934	3.93634	3.9325	3.93114	3.93065	3.92486	3.92147	3.91301	3.90714	3.90003	3.89903	3.89274	3.88968	3.88953	3.90976		-0.00916135	-0.00991586	-0.0141608	-0.00693403	0.0092876	0.0132402	0.00866813	0.00240513	-0.000493952	-0.000622898	-0.00244573	-0.000400013	0.00273739	-0.00106036	-0.00148842	0.0015214	0.000205762
[truncated: 43 more columns]

## Sheet: 1 - S2c 1.4 kPa
		Mean radial deviation per bin (mm)																															Mean curvature deviation per bin (mm^-1)
	bin index	1	2	3	4	5	6	7	8	9	10	11	12	13	14	15	16	17	18	19	20	21	22	23	24	25	26	27	28	29	30		1	2	3	4	5	6	7	8	9	10	11	12	13	14	15	16	17
	normalized cup position of bin centre	0.0166667	0.05	0.0833333	0.116667	0.15	0.183333	0.216667	0.25	0.283333	0.316667	0.35	0.383333	0.416667	0.45	0.483333	0.516667	0.55	0.583333	0.616667	0.65	0.683333	0.716667	0.75	0.783333	0.816667	0.85	0.883333	0.916667	0.95	0.983333		0.0166667	0.05	0.0833333	0.116667	0.15	0.183333	0.216667	0.25	0.283333	0.316667	0.35	0.383333	0.416667	0.45	0.483333	0.516667	0.55
	Rows correspond to individual particles	4.35477	4.36185	4.3869	4.42543	4.44236	4.4639	4.48027	4.48868	4.49489	4.49342	4.49737	4.4968	4.49175	4.48565	4.48049	4.4823	4.47577	4.47964	4.47437	4.47199	4.47408	4.4669	4.45385	4.44865	4.43847	4.42403	4.41022	4.3975	4.39469	4.40308		0.00260951	-0.0200844	-0.0204504	0.0121022	-0.00163892	0.00282061	0.0182075	0.0156938	0.00952365	0.00748207	0.0111174	0.00565379	0.00928193	-0.000384986	-0.00760775	-0.00600766	-0.00519019
		3.82985	3.78947	3.75195	3.70743	3.67024	3.63122	3.60637	3.60668	3.62635	3.64481	3.66327	3.67757	3.68849	3.69882	3.70358	3.70387	3.70138	3.70152	3.70512	3.70824	3.70528	3.69796	3.68869	3.6927	3.68583	3.68639	3.6832	3.68495	3.69146	3.70549		0.0379478	0.0337415	0.037693	0.0319943	-0.00358803	-0.0495164	-0.0853843	-0.0748394	-0.0342172	-0.00554242	0.00781055	0.0180465	0.0211969	0.0218776	0.0197346	0.00525581	-0.00339482
		3.87662	3.81173	3.80352	3.80643	3.80878	3.80924	3.81357	3.82062	3.83806	3.8408	3.84803	3.85165	3.8558	3.85903	3.85515	3.84427	3.84961	3.84473	3.8352	3.82917	3.82743	3.82303	3.81523	3.82039	3.83071	3.81938	3.82869	3.80979	3.81592	3.82995		0.0699086	-0.0371775	-0.00123328	0.00494837	-0.0119171	-0.0247285	-0.0195268	-0.0184115	-0.00415257	0.00252837	0.00664597	0.00504102	0.00929764	0.0149132	0.00956523	-0.000723233	0.00235942
		4.36531	4.31949	4.2599	4.2063	4.15951	4.12423	4.09955	4.09504	4.11075	4.13929	4.15956	4.17208	4.17489	4.1776	4.18158	4.18227	4.18365	4.18028	4.17966	4.18321	4.17939	4.18866	4.19419	4.19939	4.20298	4.20677	4.21814	4.21425	4.19173	4.20042		0.0323837	0.0486674	0.0231872	0.00693	-0.0129258	-0.0395709	-0.0664442	-0.0712658	-0.0443772	0.00445366	0.0268552	0.0298077	0.00819999	0.00199008	0.00281523	0.005734	0.00145129
		4.42895	4.39583	4.38219	4.34514	4.31173	4.29867	4.29974	4.30649	4.30613	4.31172	4.33088	4.34269	4.35513	4.36203	4.36642	4.37034	4.37106	4.3694	4.37303	4.36795	4.36674	4.35836	4.35229	4.34355	4.34494	4.3383	4.34331	4.33336	4.33058	4.32649		0.0215612	0.00720969	0.0326567	0.0158606	-0.0295383	-0.0380449	-0.0252432	-0.00643046	-0.0170332	-0.0243878	-0.0100722	0.0078179	0.0152667	0.00988022	0.0090971	0.00610274	0.00111489
		4.3417	4.24386	4.2127	4.15832	4.10072	4.04687	4.00613	3.98017	3.97517	3.99921	4.02558	4.05777	4.07909	4.1009	4.11	4.11489	4.11737	4.11755	4.11147	4.10848	4.10424	4.09783	4.09681	4.08843	4.09054	4.0897	4.09825	4.10838	4.12682	4.17902		0.0857303	0.00564529	0.0332359	0.048038	0.00683275	-0.0137223	-0.0510377	-0.0813086	-0.0843129	-0.0484278	-0.013308	0.0172017	0.0267178	0.0373308	0.0271607	0.021728	0.0176535
		3.86423	3.85045	3.83633	3.81731	3.7971	3.78939	3.78292	3.78936	3.79243	3.80353	3.80614	3.80971	3.81294	3.81537	3.82171	3.82332	3.82174	3.82144	3.81846	3.81652	3.81791	3.82231	3.82454	3.81381	3.79987	3.77147	3.77195	3.79576	3.83491	3.91166		0.00952889	0.0125043	0.0189203	0.00482785	-0.0160198	-0.0294726	-0.0250854	-0.0163041	-0.00993434	0.00375149	0.00410422	-0.00158657	-0.00283987	0.000971418	0.00515226	0.00901891	0.00405076
		4.65403	4.60639	4.55966	4.51376	4.46424	4.42818	4.40712	4.37758	4.3528	4.33973	4.33473	4.34453	4.3578	4.37303	4.38641	4.40132	4.41446	4.42847	4.44127	4.4478	4.45612	4.45638	4.46098	4.46511	4.47447	4.47205	4.46406	4.46629	4.50303	4.50817		0.0285355	0.0250909	0.0187763	0.00250961	-0.00135265	0.00252353	0.00185145	-0.0140869	-0.0363377	-0.0452315	-0.0440418	-0.0265586	-0.0112575	-0.000658205	0.000845652	0.00165206	-1.54846e-05
		3.85906	3.758	3.69256	3.63784	3.58196	3.55314	3.53577	3.53178	3.53332	3.54093	3.56675	3.58602	3.60911	3.63162	3.65767	3.66681	3.6719	3.68083	3.67554	3.67949	3.67374	3.67902	3.68075	3.67705	3.67024	3.64684	3.61539	3.54819	3.54001	3.5977		0.100149	0.0370582	0.0260006	0.00938915	-0.0380282	-0.0514256	-0.0457066	-0.0466694	-0.0574258	-0.0583822	-0.0403533	-0.0207293	-0.00157961	0.0185025	0.0232335	0.0316989	0.01856
		4.33657	4.31735	4.29957	4.27893	4.23407	4.18777	4.14788	4.1498	4.13574	4.12455	4.13462	4.1499	4.16924	4.18331	4.20124	4.22451	4.24325	4.25783	4.26748	4.2727	4.27336	4.25802	4.25092	4.24663	4.2404	4.22557	4.19914	4.18144	4.19525	4.24377		0.00954093	0.00793298	0.0282227	0.0545595	0.0290483	-0.0168125	-0.0765331	-0.020573	-0.0276087	-0.0531181	-0.0379384	-0.0272887	-0.0128998	-0.0107899	-0.00680099	0.00163139	0.0144886
		4.23266	4.23343	4.21982	4.1746	4.13811	4.09459	4.04948	4.01087	4.00396	4.01542	4.03018	4.0444	4.06665	4.08442	4.09715	4.11333	4.12214	4.13765	4.13888	4.13723	4.138	4.14069	4.14789	4.14979	4.15128	4.14787	4.13089	4.11303	4.10993	4.11769		-0.0120111	0.0293092	0.0497915	0.0312638	0.0390504	-0.00309782	-0.0471315	-0.0911595	-0.0816882	-0.0447214	-0.0212285	-0.0115645	-0.00606018	0.00357101	0.000905174	0.0050926	0.011766
		4.00936	3.98286	3.959	3.92626	3.89264	3.87832	3.86331	3.86367	3.85858	3.85784	3.86219	3.8644	3.86648	3.86805	3.86893	3.87084	3.87297	3.8762	3.87972	3.88831	3.89117	3.8955	3.90859	3.90512	3.90171	3.90487	3.9067	3.91324	3.93284	3.95023		0.0255928	0.01821	0.0294258	0.0124033	-0.0219971	-0.0195129	-0.0139399	-0.0139677	-0.010587	-0.00815096	-0.00247	0.00339525	0.00539159	0.00262629	0.00108422	-0.002245	-0.00388028
		4.31037	4.29519	4.31354	4.3348	4.33983	4.33877	4.34417	4.35034	4.36474	4.36492	4.37208	4.3705	4.37774	4.38077	4.38238	4.37912	4.38469	4.38552	4.37976	4.37103	4.36168	4.35453	4.34063	4.32848	4.3092	4.3055	4.30573	4.31734	4.33483	4.33117		0.00131576	-0.0190577	-0.00189116	0.0116696	0.00690765	-0.0131116	-0.0177328	-0.0101397	0.00648216	0.00388819	-0.00131742	-0.004948	-0.00121341	-0.0023654	-0.00134617	-0.000366835	0.00661725
		3.69371	3.6539	3.62706	3.59806	3.56685	3.53924	3.51001	3.49418	3.4936	3.49679	3.50674	3.52451	3.54115	3.54928	3.56217	3.56864	3.57718	3.57775	3.58637	3.59687	3.59755	3.59704	3.59522	3.59906	3.59431	3.59199	3.58416	3.57208	3.52803	3.50311		0.0371536	0.0181567	0.0276935	0.0305663	0.0192667	-0.00227428	-0.0383328	-0.0560965	-0.053274	-0.0364079	-0.0213281	-0.0131747	-0.00119803	0.0158587	0.0213844	0.0125529	-0.000797591
		5.0616	4.97214	4.89476	4.81116	4.72424	4.61992	4.52051	4.40299	4.31607	4.23369	4.20273	4.21454	4.25871	4.32322	4.38107	4.43924	4.47802	4.51524	4.5419	4.56668	4.58854	4.59607	4.60264	4.61266	4.62509	4.63601	4.64294	4.66567	4.68497	4.6979		0.0335536	0.0293766	0.0372538	0.0455216	0.0500229	0.0484099	0.0299473	-0.0236255	-0.0789653	-0.139833	-0.166465	-0.131057	-0.0773444	-0.0210723	0.0159697	0.0328235	0.0314282
		3.50062	3.47644	3.43824	3.38129	3.32412	3.24525	3.16934	3.07507	2.97836	2.89005	2.80134	2.73417	2.70603	2.71222	2.76088	2.83385	2.906	2.96803	3.01894	3.06569	3.10229	3.13843	3.16923	3.197	3.2306	3.25675	3.27956	3.29453	3.31141	3.34123		-0.0173878	0.0265762	0.0561639	0.0828774	0.0976481	0.0865456	0.0687256	0.0383068	-0.0208242	-0.0764853	-0.177701	-0.265983	-0.312959	-0.270807	-0.168298	-0.0692117	0.0137304
		4.63568	4.58603	4.52437	4.49828	4.46488	4.42945	4.39292	4.35953	4.33954	4.32754	4.32486	4.33103	4.34074	4.35394	4.36715	4.38247	4.39411	4.40642	4.41646	4.42763	4.44008	4.45249	4.46518	4.47107	4.46943	4.47276	4.46784	4.46008	4.46749	4.47787		0.0242374	0.0204501	-0.00719007	0.00915567	0.00959538	0.00594957	-0.00430138	-0.0321944	-0.0401522	-0.0434832	-0.0395347	-0.0318602	-0.0201594	-0.0125975	-0.00522768	0.0030412	0.00136399
		3.65619	3.60065	3.56397	3.52835	3.47443	3.41728	3.34442	3.26353	3.16472	3.0765	2.9819	2.90786	2.83092	2.76541	2.74358	2.7544	2.80115	2.90498	3.00848	3.10152	3.18965	3.25531	3.30599	3.35236	3.38152	3.43395	3.47324	3.50636	3.54457	3.58368		0.00410435	-0.0108048	0.0107107	0.0379385	0.0723025	0.0819632	0.0839301	0.0622662	0.0217322	-0.0208281	-0.059312	-0.0843018	-0.13384	-0.211503	-0.290205	-0.305928	-0.223432
		4.0228	3.96095	3.92747	3.85607	3.80251	3.76955	3.73958	3.694	3.66356	3.62304	3.59281	3.5688	3.5511	3.54816	3.56237	3.57813	3.60404	3.62593	3.6496	3.67427	3.7	3.71194	3.72322	3.74379	3.75988	3.79071	3.79892	3.84049	3.87187	3.93069		0.0594908	0.00681583	0.0570802	0.0157279	-0.00147989	-0.000419653	0.0201745	0.0185266	0.0019592	-0.000757764	-0.0364812	-0.050749	-0.0686332	-0.0666489	-0.0429818	-0.0236317	-0.00634203
		4.60095	4.55174	4.50914	4.46806	4.42128	4.36643	4.31328	4.25286	4.17599	4.08199	3.98773	3.89105	3.8208	3.78837	3.79574	3.84245	3.90092	3.96994	4.04705	4.11625	4.17732	4.23438	4.28295	4.32582	4.35864	4.38718	4.41841	4.45089	4.49439	4.53967		0.00446844	-0.00749726	-9.44081e-05	0.0119489	0.00857093	0.0183886	0.0471607	0.0626308	0.0660227	0.0293363	-0.0297973	-0.113678	-0.172825	-0.191741	-0.16096	-0.106084	-0.0548988
		4.01938	3.9824	3.98051	3.97084	3.95517	3.93013	3.88779	3.84767	3.78558	3.73689	3.69247	3.6558	3.63161	3.63571	3.64894	3.67649	3.70903	3.73841	3.7704	3.78945	3.80261	3.83269	3.84705	3.87104	3.8943	3.9047	3.92569	3.94442	3.95746	3.99382		-0.00277443	-0.010471	0.0108134	0.0230339	0.044136	0.0575106	0.0562757	0.040717	0.0062327	-0.0218787	-0.0552879	-0.087619	-0.109114	-0.0895568	-0.0651534	-0.0333491	0.0046145
		4.07198	4.02999	3.98102	3.93767	3.91588	3.864	3.80998	3.77032	3.73031	3.68424	3.66465	3.63086	3.58728	3.53795	3.48448	3.44018	3.42673	3.4548	3.51797	3.57918	3.65182	3.71411	3.78136	3.83495	3.87296	3.91596	3.94551	3.97764	4.00778	4.03955		0.0105797	0.00818376	-0.00256132	0.00239845	0.0378918	0.0299662	-0.00638811	-0.0178604	-0.0356531	-0.0383059	0.0151889	0.0401809	0.0337825	-0.00404184	-0.0911089	-0.176302	-0.203302
		5.16138	5.10207	5.09674	5.07646	5.05314	5.02404	4.98717	4.95275	4.9131	4.86944	4.81332	4.75055	4.6701	4.58948	4.52552	4.51471	4.5612	4.63066	4.71616	4.79439	4.86079	4.91387	4.96214	5.00128	5.02623	5.05128	5.07416	5.10189	5.14277	5.18678		-0.00708641	-0.0218618	0.0162398	-0.00433012	-0.00796369	-0.000490126	-0.000446818	0.00483583	0.0187322	0.0312024	0.0382289	0.0334339	-0.0099653	-0.0910011	-0.183972	-0.188566	-0.123119
		4.30955	4.33634	4.32851	4.30652	4.28368	4.25902	4.23472	4.2117	4.19528	4.15896	4.14261	4.1207	4.09451	4.08457	4.08376	4.09674	4.10397	4.12511	4.13905	4.15683	4.17531	4.19635	4.22393	4.24388	4.24783	4.26733	4.27988	4.28484	4.31647	4.36228		-0.0162693	0.020415	0.0161445	0.0112603	0.00842225	0.00269389	0.000800454	0.00593621	0.00759357	0.00232271	-0.00419547	-0.0248713	-0.0421172	-0.0539215	-0.0466195	-0.0343475	-0.0220761
		4.18481	4.16172	4.13904	4.13319	4.1198	4.10866	4.09134	4.06952	4.04432	4.01334	3.98322	3.95007	3.92284	3.90165	3.8841	3.87508	3.8753	3.8871	3.90672	3.93822	3.97343	4.01136	4.04827	4.07984	4.10252	4.11849	4.16332	4.19289	4.21661	4.25618		0.0149001	-0.000576034	-0.0106469	0.00543363	0.01626	0.0137664	0.0254739	0.0295767	0.0264857	0.015687	0.00619506	-0.0101405	-0.0239971	-0.0268954	-0.0387647	-0.0479938	-0.0506085
		4.54654	4.50048	4.47334	4.44333	4.42862	4.40717	4.38887	4.37411	4.35322	4.33872	4.32815	4.31521	4.29543	4.27541	4.24353	4.22407	4.20964	4.20843	4.21991	4.25183	4.28639	4.32635	4.36607	4.38918	4.423	4.44515	4.45937	4.48082	4.49603	4.5098		0.0261954	-0.00146761	5.88767e-05	-0.00077831	-0.00442865	0.00345998	0.00599292	-0.00157915	-0.00703127	-0.00622004	0.00683108	0.0192048	0.0231106	0.0110348	-0.0206745	-0.0400451	-0.0621201
		3.6919	3.66575	3.64648	3.623	3.59643	3.57814	3.56521	3.56305	3.53553	3.52544	3.51643	3.49954	3.49053	3.46947	3.4587	3.44383	3.44044	3.44703	3.45135	3.4759	3.502	3.52463	3.55054	3.56695	3.57896	3.58661	3.61407	3.64689	3.68971	3.76502		0.0231365	0.0104427	0.0237008	0.0145435	-0.0011331	-0.01301	0.00258306	0.00881871	0.01291	0.00658115	0.0130226	0.0104987	0.00690997	-0.00588796	-0.0184362	-0.0394979	-0.045792
		3.77561	3.74224	3.70107	3.66288	3.63061	3.60176	3.575	3.5473	3.51834	3.48516	3.45525	3.41978	3.38301	3.34304	3.3109	3.26914	3.23669	3.21741	3.21353	3.23857	3.29075	3.37852	3.45779	3.55006	3.63676	3.70899	3.78154	3.8456	3.90583	3.96406		0.0179566	0.023672	-0.00300694	-0.0120082	-0.012848	0.00304563	0.00402387	0.00670699	0.0122861	0.0157884	0.0173377	0.0161171	0.0116182	0.00208312	-0.0153849	-0.049609	-0.0786403
		4.45495	4.43435	4.41042	4.38877	4.39452	4.37707	4.37083	4.37069	4.36722	4.37036	4.36713	4.36585	4.37509	4.37501	4.38448	4.3841	4.38014	4.37842	4.36905	4.36695	4.35933	4.3577	4.37709	4.39037	4.39415	4.39793	4.40411	4.41536	4.42404	4.46278		0.0152757	0.0164383	0.000452247	-0.0164815	0.00965397	0.0086279	-0.0115481	-0.0115136	-0.00182133	0.00181146	-0.00992436	-0.0127743	0.000414243	-0.000857016	0.0139757	0.0149886	0.0126893
		3.94789	3.9132	3.9033	3.88921	3.90859	3.92568	3.9508	3.96234	3.98839	4.00412	4.02651	4.03802	4.05273	4.06638	4.06708	4.06279	4.05956	4.05061	4.03745	4.01075	3.98054	3.93563	3.87971	3.78987	3.74458	3.7925	3.88815	3.99106	4.09037	4.17504		0.0171793	-0.00664627	-0.0207217	-0.0331128	-0.0278322	-0.0243956	-0.0196352	-0.0228496	-0.0147891	-0.0208208	-0.00711227	0.00190315	0.0109062	0.0150531	0.0126994	0.0196833	0.013637
		3.32511	3.45229	3.51388	3.54197	3.55715	3.57506	3.58485	3.59366	3.59714	3.61114	3.61276	3.61623	3.61363	3.61239	3.60515	3.60917	3.5982	3.59586	3.58402	3.57427	3.56662	3.55007	3.5373	3.52546	3.50643	3.49301	3.47825	3.46586	3.44403	3.42305		-0.0749256	0.0106659	0.0318267	0.025606	0.0110122	0.00937473	0.0055914	0.000777305	0.00107419	0.012216	0.0184275	0.0158936	0.0123305	0.00727596	-0.000661791	0.00543195	0.00715363
		3.89164	3.8507	3.81288	3.79026	3.76665	3.75393	3.75276	3.78076	3.76891	3.78835	3.81509	3.83866	3.84975	3.87007	3.88224	3.89376	3.90087	3.89929	3.89391	3.88762	3.88328	3.8591	3.84105	3.82362	3.78532	3.76043	3.73769	3.73411	3.75494	3.83934		0.0471355	0.0214911	-0.00362791	-0.0161248	-0.0266365	-0.0357806	-0.0370457	-0.0272694	-0.0340751	-0.030177	-0.0153948	-0.00565619	0.00200947	0.00745511	0.014713	0.0161674	0.020608
		3.49886	3.57295	3.60471	3.62237	3.64046	3.65794	3.66876	3.68449	3.69067	3.70029	3.71506	3.7184	3.73226	3.73797	3.74947	3.76118	3.77561	3.79212	3.81106	3.81732	3.83773	3.84007	3.83762	3.81845	3.7607	3.67884	3.55369	3.44451	3.39284	3.37546		-0.044816	0.00969569	0.00595334	-0.0109952	-0.00341913	0.000779415	0.000398313	-0.00280519	-0.00585381	-0.00979608	-0.00853835	-0.0095015	-0.00880244	-0.0207419	-0.0242736	-0.0260406	-0.0185675
[truncated: 43 more columns]

## Sheet: 1 - S2d,e
1.4 kPa			6.5 kPa
* indicates that no constriction was observable
Fraction engulfed	Sphericity	Constriction magnitude (mm)	Fraction engulfed	Sphericity	Constriction magnitude (mm)
0.1872	0.998	NaN	0.3205	0.9971	0.0424
0.2996	0.9976	0.0778	0.3473	0.9981	0.0148
0.3492	0.996	0.0321	0.4815	0.9987	0.0118
0.35	0.9975	0.0823	0.4834	0.9992	0.0165
0.3598	0.9973	0.0362	0.4934	0.9987	NaN
0.4023	0.9964	0.1134	0.4996	0.9986	0.0338
0.4303	0.9963	0.0322	0.5355	0.9981	NaN
0.4462	0.9972	0.0912	0.5366	0.9974	0.0278
0.4523	0.9941	0.11	0.6141	0.9979	0.0175
0.4552	0.9957	0.1059	0.6164	0.9987	0.0434
0.4757	0.9962	0.1056	0.6659	0.9979	0.0279
0.5008	0.9985	0.0256	0.6972	0.9983	0.053
0.5057	0.9976	0.0484	0.7024	0.9973	0.1544
0.5102	0.9955	0.0637	0.7139	0.9974	0.0895
0.5124	0.9902	0.3327	0.7191	0.9975	0.0985
0.5345	0.981	0.3985	0.7834	0.9944	0.1913
0.5857	0.9971	0.1007	0.79	0.9975	0.0742
0.6113	0.9754	0.4821	0.9547	0.9989	NaN
0.6239	0.9948	0.1292	0.9569	0.9947	0.1383
0.6408	0.9875	0.4505
0.6424	0.9946	0.1877
0.6555	0.9881	0.3297
0.6707	0.9904	0.4074
0.7165	0.996	0.1185
0.7932	0.9959	0.1533
0.8073	0.9968	0.1468
0.8419	0.9961	0.1038
0.8421	0.9888	0.284
0.9528	0.9942	0.0194
0.9568	0.9919	0.252
0.977	0.9972	NaN
0.9915	0.9957	0.1144
0.9935	0.9926	NaN

## Sheet: 1 - S2f
		Experiment 1
		Adherent	Internalized	Total	Phagocytic index	Relative phagocytosis			Phagocytic index = internalized particles/total particles
	DMSO	73	36	109	0.330275	1			Relative phagocytosis = phagocytic index drug/phagocytic index DMSO
	CK666	40	1	41	0.0243902	0.0738482
	Bleb	93	47	140	0.335714	1.01647
	SMIFH2	74	14	88	0.159091	0.481692
		Experiment 2
		Adherent	Internalized	Total	Phagocytic index	Relative phagocytosis
	DMSO	120	16	136	0.117647	1
	CK666	97	0	97	0	0
	Bleb	183	40	223	0.179372	1.52466
	SMIFH2	137	16	153	0.104575	0.888889
