# Supplementary material for: Phagocytic ‘teeth’ and myosin-II ‘jaw’ power target constriction during phagocytosis
Source: eLife. 2021 Oct 28;10:e68627. doi: 10.7554/eLife.68627 (PMC8585483; doi:10.7554/eLife.68627)
Supplement: Figure 2—source data 1. [file elife-68627-fig2-data1.xlsx]

## Sheet: 2d & j
Particle	Fraction engulfed	Average absolute normal stress	Average absolute shear stress	Total normal force in rim	Total normal force inside cup
		Pa	Pa	nN	nN
1	0.225	46.41	9.23	1.4	-0.322
2	0.263	34.5	8.31	3.3	-0.9
3	0.366	24.8	4.32	2.3	-0.8
4	0.442	30.5	5.64	1.8	-0.23
5	0.495	28.7	7.02	5.7	-1.6
6	0.521	36.7	7.68	7	-2.5
7	0.546	21.7	5.13	4.8	-2.9
8	0.567	39.65	8.06	8.9	-2
9	0.585	25.9	6.39	10.5	-3.1
10	0.651	30	6.51	4.9	-0.34
11	0.667	40.6	6.27	5.3	-1.8
12	0.708	31.7	5.76	8.8	-2
13	0.743	33.6	7.17	9.9	-1
14	0.781	32.3	6.06	6.8	-0.74
15	0.804	40.2	7.11	12.2	3.8
16	0.82	36.14	6.5	9.38	3.92
17	0.845	20.6	4.62	14.7	11.6
18	0.9	45.4	6.15	11.4	12.8

## Sheet: 2f
		Mean radial deviation per bin (mm)																															Mean curvature deviation per bin (mm^-1)
	bin index	1	2	3	4	5	6	7	8	9	10	11	12	13	14	15	16	17	18	19	20	21	22	23	24	25	26	27	28	29	30		1	2	3	4	5	6	7	8	9	10	11	12	13	14	15	16	17
	normalized cup position of bin centre	0.0166667	0.05	0.0833333	0.116667	0.15	0.183333	0.216667	0.25	0.283333	0.316667	0.35	0.383333	0.416667	0.45	0.483333	0.516667	0.55	0.583333	0.616667	0.65	0.683333	0.716667	0.75	0.783333	0.816667	0.85	0.883333	0.916667	0.95	0.983333		0.0166667	0.05	0.0833333	0.116667	0.15	0.183333	0.216667	0.25	0.283333	0.316667	0.35	0.383333	0.416667	0.45	0.483333	0.516667	0.55
	Rows correspond to individual particles
		4.7305	4.7573	4.76079	4.76884	4.77147	4.77413	4.78168	4.78624	4.78861	4.79168	4.79115	4.78381	4.77696	4.77031	4.76334	4.75034	4.74412	4.73776	4.73658	4.73432	4.74532	4.75185	4.76001	4.76439	4.77309	4.77863	4.78103	4.78306	4.77952	4.76654		-0.0130045	0.00655515	-0.00158871	0.00137366	-0.00356074	-0.00717829	-0.000204956	0.00334853	0.00292348	0.0125985	0.0139796	0.00753767	0.00135513	0.00246402	0.00215161	-0.00891843	-0.011271
		4.38745	4.37803	4.41286	4.46782	4.51196	4.52805	4.53551	4.54233	4.55159	4.54853	4.54499	4.53906	4.53354	4.53139	4.52272	4.51158	4.50265	4.48819	4.47852	4.46799	4.45835	4.45522	4.44646	4.45211	4.45046	4.46231	4.47988	4.48659	4.49514	4.51536		0.0087918	-0.0508552	-0.0374747	-0.00222676	0.0216688	0.010705	-0.00142414	0.00557115	0.0155658	0.0078852	-0.00176618	-0.00661097	-0.00138162	0.00265845	0.00337153	0.00149754	-0.00480648
		3.95373	3.88271	3.85213	3.83664	3.81372	3.81337	3.85133	3.88437	3.90397	3.91338	3.92185	3.92551	3.92864	3.92433	3.92443	3.91769	3.9154	3.9105	3.90789	3.90323	3.90739	3.90125	3.89657	3.89499	3.89222	3.88569	3.88129	3.87413	3.84956	3.81418		0.0782784	0.0217327	-0.000702634	-0.00341448	-0.075044	-0.102086	-0.0259402	0.0175531	0.0257657	0.0222641	0.0138601	0.0110636	0.0135888	0.00418163	0.00380668	-0.00285583	-0.00335925
		3.75276	3.71678	3.68599	3.68502	3.70509	3.71566	3.72432	3.73191	3.73706	3.73729	3.74531	3.74611	3.73934	3.73168	3.73543	3.73464	3.73379	3.72612	3.71916	3.70782	3.70614	3.70331	3.70492	3.7113	3.71628	3.71631	3.72055	3.71879	3.72421	3.74503		0.0403728	0.0201668	-0.044497	-0.038747	-0.00653556	0.00760446	0.00283939	-0.000951216	0.00404318	0.0103275	0.0188977	0.012336	-0.00156057	-0.00883466	-0.00253984	0.00918653	0.0145631
		3.9343	3.97278	3.9713	3.94772	3.90381	3.84624	3.78777	3.76317	3.77809	3.82264	3.86336	3.89344	3.91292	3.9238	3.92486	3.93126	3.9335	3.93496	3.92928	3.92098	3.91334	3.91037	3.90256	3.89591	3.89243	3.89528	3.89952	3.88876	3.8711	3.86076		-0.0281256	0.038225	0.066296	0.0887563	0.0609275	-0.024408	-0.117287	-0.165433	-0.127923	-0.043754	0.0240096	0.0483576	0.0412538	0.0195644	0.0118593	0.00721109	0.0116807
		4.35768	4.30629	4.23344	4.16925	4.14492	4.17008	4.22551	4.26583	4.29428	4.30823	4.31231	4.31238	4.30793	4.3021	4.30031	4.29287	4.29127	4.29092	4.27918	4.27573	4.27489	4.26486	4.25861	4.25346	4.25368	4.24832	4.24236	4.25145	4.25587	4.24911		0.051681	0.073125	0.0251017	-0.081174	-0.113202	-0.0850219	-0.0132556	0.028555	0.0394245	0.0356702	0.019885	0.0123331	0.00333276	-0.0066879	-0.00586415	-0.00465017	-0.00412765
		3.76859	3.70947	3.70088	3.7213	3.73268	3.73068	3.73338	3.7377	3.73968	3.73663	3.73575	3.73417	3.73305	3.73656	3.73688	3.73934	3.7376	3.72906	3.73205	3.73103	3.7261	3.73222	3.73838	3.74269	3.73957	3.73836	3.71333	3.69788	3.71282	3.77309		0.0590477	-0.0393395	-0.0440089	0.00704583	0.0150035	0.00437532	-0.00425962	0.0024992	0.00795283	0.00491977	-0.00451985	-0.00617542	-0.00735512	-0.00139567	0.00517499	0.00999442	0.00445216
		4.53122	4.51075	4.47544	4.46291	4.4621	4.47655	4.51143	4.55372	4.58946	4.61472	4.63193	4.63955	4.64396	4.64776	4.65035	4.64997	4.64651	4.63897	4.63168	4.62432	4.61533	4.60393	4.58452	4.55546	4.53545	4.51825	4.49673	4.47976	4.43797	4.43408		0.0222554	0.0236328	-0.014308	-0.0272132	-0.0402628	-0.0592286	-0.0357865	-0.00523587	0.0197052	0.0272096	0.0217	0.0122032	0.00381507	0.00142308	0.00351309	0.00754367	0.00722458
		3.96177	3.90632	3.87776	3.82439	3.79005	3.79437	3.81655	3.8364	3.83166	3.83187	3.83517	3.82971	3.83212	3.83766	3.83585	3.84373	3.82788	3.82728	3.82567	3.82562	3.82881	3.83129	3.82754	3.83068	3.83185	3.84881	3.85318	3.86177	3.89021	3.93217		0.0382047	0.0193382	0.0311594	-0.0335242	-0.0825412	-0.0599515	-0.00992823	0.0227919	0.00977652	-0.00246531	-0.00978994	-0.0160606	-0.011172	-0.00189233	0.00481127	0.000243334	-0.00329483
		4.2002	4.1734	4.1617	4.16662	4.17555	4.17541	4.17817	4.17459	4.18409	4.18466	4.18884	4.18547	4.18134	4.17431	4.17454	4.17244	4.17342	4.17514	4.17031	4.17121	4.17019	4.16575	4.16709	4.16425	4.16662	4.16895	4.17165	4.17823	4.19318	4.21449		0.0299565	-0.00969125	-0.0274932	-0.00865412	0.00499001	0.00507097	-0.00272164	-0.00970507	0.00078208	0.00877445	0.0133406	0.0110126	0.000340756	-0.00824345	-0.00805375	-0.00414681	-0.000165512
		3.85914	3.80243	3.75898	3.72104	3.69428	3.67687	3.67085	3.67837	3.72428	3.75695	3.78132	3.79243	3.80184	3.80785	3.8139	3.81244	3.80852	3.8074	3.79951	3.78969	3.77925	3.77612	3.77124	3.76119	3.7452	3.72844	3.71525	3.71026	3.72442	3.73854		0.0595714	0.0340777	0.000986594	-0.0141502	-0.0276456	-0.0561581	-0.0956126	-0.0992251	-0.0251797	0.0241829	0.0341748	0.022089	0.0116201	0.0085871	0.0074974	0.00782172	0.00517766
		3.82337	3.75443	3.70849	3.66328	3.64341	3.63837	3.64944	3.66243	3.67788	3.68959	3.69857	3.70203	3.70475	3.70476	3.7029	3.70098	3.69787	3.69784	3.69861	3.6986	3.69969	3.69493	3.69447	3.69277	3.69467	3.69569	3.69405	3.68976	3.6865	3.69131		0.0766923	0.0258922	0.0144463	-0.0385716	-0.0460203	-0.0521901	-0.0310717	-0.015819	0.00357452	0.00971126	0.0132082	0.0124122	0.01094	0.00544873	-0.000321954	-0.00460834	-0.00949206
		4.55187	4.56986	4.56413	4.54531	4.51966	4.50821	4.50722	4.51688	4.5201	4.52974	4.55509	4.56023	4.5613	4.56674	4.57531	4.57294	4.57294	4.57122	4.56713	4.56503	4.55558	4.5554	4.55586	4.54641	4.54228	4.53558	4.53482	4.53809	4.52811	4.52178		-0.00940501	0.0203985	0.0252854	0.00348636	-0.0189939	-0.0280608	-0.0224267	-0.0234358	-0.0238178	-0.013139	0.0113086	0.012188	0.00383682	-0.000846768	0.00478945	0.00609065	0.00427466
		4.53701	4.51837	4.52204	4.51104	4.48623	4.46477	4.45742	4.45257	4.46313	4.48028	4.52001	4.5532	4.57153	4.58453	4.59286	4.59016	4.58177	4.57713	4.57577	4.56742	4.55607	4.54358	4.53271	4.52443	4.51403	4.50064	4.48128	4.45912	4.46223	4.46547		0.021341	-0.016536	0.0120639	0.0153453	-0.0109167	-0.0258701	-0.0363224	-0.0594618	-0.0676463	-0.050469	-0.00735549	0.0216241	0.0231894	0.0221357	0.0209167	0.0087089	-0.00534864
		3.96016	3.95602	3.94014	3.91607	3.8979	3.8861	3.89908	3.90735	3.92268	3.94628	3.9701	3.98289	3.985	3.98525	3.98891	3.9855	3.98357	3.97821	3.97242	3.96234	3.95022	3.94321	3.93457	3.92631	3.92628	3.92144	3.91647	3.91987	3.92834	3.92691		0.00592391	0.0260384	0.024947	-0.00302567	-0.028915	-0.0487413	-0.0356626	-0.0368519	-0.0244805	0.000149266	0.0228671	0.0288447	0.0216716	0.0093273	0.00590025	0.00837107	0.00864191
		4.11081	4.00329	3.96482	3.95766	3.9594	3.9288	3.921	3.92103	3.90662	3.89165	3.8852	3.87822	3.89129	3.89904	3.90737	3.92147	3.92592	3.92302	3.92023	3.91738	3.92125	3.92057	3.92589	3.92468	3.93282	3.9409	3.95148	3.96348	3.97694	4.01334		0.167267	-0.0228913	-0.032419	-0.02578	0.0192822	-0.00711834	-0.00860726	0.0117198	0.00561955	-0.0201531	-0.0329453	-0.0351148	-0.024391	-0.00906704	0.00808842	0.0199357	0.0249126
		3.91275	3.88693	3.87774	3.85536	3.81322	3.7595	3.72372	3.68469	3.63841	3.58952	3.56511	3.56065	3.58539	3.63073	3.67887	3.72238	3.75276	3.77166	3.78405	3.78959	3.79293	3.79778	3.79505	3.78551	3.76529	3.76207	3.76487	3.76128	3.75748	3.76445		-0.000988598	-0.00604745	0.041291	0.0509593	0.032824	0.00738549	0.0151359	0.0195424	-0.0261301	-0.101732	-0.140111	-0.145686	-0.114602	-0.0522426	0.00909134	0.0495076	0.0575696
		3.91014	3.87562	3.8418	3.80303	3.77149	3.74276	3.7162	3.68153	3.66539	3.66561	3.69931	3.74219	3.77887	3.80732	3.81984	3.82971	3.83444	3.83337	3.82712	3.82413	3.81885	3.80577	3.79922	3.78903	3.78839	3.77591	3.773	3.76634	3.76654	3.77787		0.0208466	0.0309988	0.0210516	0.00974475	0.0135962	0.0164831	-0.0113282	-0.064997	-0.102964	-0.114986	-0.0673446	-0.00587103	0.0332259	0.0450769	0.0452087	0.0384137	0.0216184
		5.68697	5.67258	5.63228	5.60292	5.59655	5.57128	5.56132	5.5388	5.52321	5.51913	5.5313	5.54482	5.55962	5.57622	5.59665	5.61106	5.62003	5.62444	5.62607	5.62219	5.62359	5.61943	5.61752	5.60646	5.6014	5.59726	5.59156	5.57983	5.57254	5.58593		0.0124321	0.027203	-0.00245542	-0.0215115	0.00451273	-0.00685734	0.00969198	-0.00936332	-0.0387366	-0.0411172	-0.0187449	-0.00870913	-0.010934	-0.00700755	0.00823851	0.0128531	0.0111798
		3.9533	3.89911	3.85998	3.8137	3.76075	3.68567	3.60943	3.54678	3.49489	3.4768	3.48944	3.51881	3.57053	3.64082	3.68566	3.71066	3.73071	3.74457	3.75166	3.75899	3.75908	3.75191	3.74399	3.73477	3.72812	3.71668	3.70986	3.6898	3.66785	3.67117		0.0268152	0.0166472	0.0559613	0.0694896	0.0713951	0.0402229	-0.0130154	-0.0828508	-0.145442	-0.163663	-0.149956	-0.116336	-0.0402917	0.0261088	0.0603207	0.0619051	0.0459586
		4.28551	4.23237	4.2069	4.16949	4.131	4.09185	4.04398	3.9917	3.94431	3.90605	3.88041	3.86564	3.87612	3.90747	3.94651	3.98145	4.01142	4.03753	4.05578	4.06828	4.07526	4.08199	4.08901	4.08998	4.09656	4.10366	4.10639	4.1062	4.10646	4.11669		0.0286386	-0.00471641	0.0252632	0.026523	0.0355797	0.0392579	0.0189276	-0.000467332	-0.0282712	-0.0598565	-0.0786295	-0.102566	-0.0943674	-0.0466006	-0.000189185	0.0172051	0.0325494
		4.24011	4.17164	4.11289	4.04373	3.96768	3.89438	3.81355	3.73012	3.64614	3.58085	3.54043	3.54347	3.57649	3.65457	3.72206	3.79592	3.83947	3.86679	3.8935	3.90956	3.92457	3.93295	3.93172	3.92649	3.91297	3.91254	3.90773	3.88482	3.87246	3.87978		0.0299945	0.0256616	0.039522	0.0440211	0.039559	0.044573	0.0322925	-0.0149991	-0.0729697	-0.144615	-0.204886	-0.205589	-0.166058	-0.067606	0.00997915	0.0575392	0.062937
		3.67437	3.64934	3.63357	3.60654	3.57066	3.52038	3.46237	3.40047	3.34567	3.31506	3.30779	3.32176	3.36139	3.4189	3.4701	3.49918	3.52188	3.52967	3.52777	3.52273	3.51179	3.51469	3.51751	3.51742	3.51647	3.50427	3.51088	3.51936	3.5444	3.58752		0.00208925	-0.00132616	0.0313577	0.0634386	0.0742201	0.0559417	0.0187916	-0.0460828	-0.113511	-0.148753	-0.16503	-0.148405	-0.0851305	-0.0057821	0.054153	0.0768984	0.0805984
		4.40894	4.34874	4.2761	4.20784	4.14785	4.08338	4.01865	3.96439	3.92978	3.92121	3.93974	3.96625	3.99238	4.00932	4.03024	4.04408	4.04591	4.06155	4.06843	4.06826	4.07891	4.08136	4.09366	4.10059	4.11637	4.12901	4.14687	4.16241	4.179	4.20056		0.0457869	0.0463026	0.0235707	0.0265468	0.0278993	0.01725	-0.024707	-0.0710067	-0.0986599	-0.0977858	-0.0539035	-0.0115527	0.0109592	0.0174756	0.0174928	0.0157143	0.00546492
		4.47496	4.45016	4.46739	4.46867	4.46172	4.4422	4.42667	4.41328	4.40797	4.39104	4.37561	4.36355	4.35366	4.35421	4.36312	4.37454	4.38304	4.40252	4.41877	4.43633	4.44453	4.45452	4.46188	4.46354	4.45867	4.44635	4.43629	4.4259	4.422	4.42382		0.00989787	-0.0208604	-0.00203226	0.0188939	0.026797	0.00195591	-0.0220445	-0.00847326	0.00584438	0.004296	-0.00931202	-0.0298766	-0.0402535	-0.0360497	-0.0201806	-0.0188199	-0.0171994
		4.52893	4.52199	4.48943	4.44142	4.40001	4.38139	4.364	4.33741	4.32054	4.328	4.34002	4.35819	4.37838	4.39314	4.40089	4.40135	4.40507	4.40948	4.40969	4.41296	4.41245	4.40989	4.40942	4.40795	4.41067	4.41919	4.41902	4.42412	4.43289	4.46492		0.00654354	0.039408	0.0482407	-8.96106e-05	-0.0222106	-0.0160576	0.00424093	-0.0230885	-0.0522663	-0.0498914	-0.0294433	-0.00255352	0.0135026	0.0269432	0.020402	0.00626764	0.00237004
		4.25312	4.22885	4.19592	4.16602	4.13316	4.10434	4.08206	4.06073	4.02942	3.99894	3.97017	3.95349	3.95596	3.97637	4.00999	4.04095	4.06528	4.08173	4.09325	4.09961	4.10946	4.11164	4.11792	4.1201	4.12664	4.13115	4.12603	4.12587	4.13271	4.15673		0.00843701	0.0198826	0.0235172	0.0114451	-0.00637303	-0.00593623	0.0146279	0.0235581	0.0105128	-0.0179798	-0.0599067	-0.0883939	-0.0875934	-0.0583144	-0.0106053	0.0234812	0.0295855
		5.09677	5.17687	5.2061	5.21025	5.20696	5.21573	5.2183	5.22385	5.22359	5.22314	5.22431	5.22809	5.23128	5.23511	5.23766	5.23762	5.23376	5.2286	5.22799	5.23211	5.23475	5.23618	5.22654	5.21547	5.20923	5.20071	5.18687	5.17956	5.13998	5.14269		-0.0318896	0.0183573	0.0147098	0.00197189	-0.0107263	-0.00520579	0.000474756	0.00773018	-0.000773771	-0.00633184	-0.00900037	-0.00598477	-0.00203574	0.00518886	0.00770081	0.00683926	-0.00105163
		4.71229	4.652	4.60297	4.55368	4.50646	4.4623	4.42072	4.37524	4.3277	4.27828	4.22987	4.18621	4.17759	4.19774	4.2518	4.30563	4.35164	4.38716	4.41701	4.43739	4.45631	4.47751	4.48739	4.49401	4.49618	4.49507	4.49034	4.48001	4.46498	4.46061		0.0240263	0.00918817	0.0119665	0.0071479	0.000248306	0.00481889	0.00924171	0.0206227	0.0180904	-0.00777766	-0.0570621	-0.124654	-0.14315	-0.113644	-0.0391054	0.00625183	0.0305648
		3.78999	3.84027	4.00742	4.01926	4.02161	4.02016	4.01756	4.00669	3.99864	3.99004	3.99054	3.98774	3.99622	4.00427	4.01313	4.00442	3.99085	3.97409	3.97221	3.96792	3.9598	3.94502	3.93494	3.93041	3.9254	3.92803	3.92223	3.92779	3.94662	3.94948		-0.0312151	-0.0476897	0.0421172	0.0220668	0.0132786	0.0166705	0.00967567	-0.00415954	-0.0159488	-0.0272976	-0.0301744	-0.0266062	-0.012926	0.0176178	0.0393325	0.0259383	0.000401576
		3.98649	3.94978	3.92511	3.88768	3.83722	3.78172	3.74407	3.71077	3.67256	3.64502	3.60526	3.59425	3.59297	3.60641	3.63171	3.66528	3.69852	3.7313	3.75418	3.7703	3.7817	3.79306	3.80088	3.81153	3.81408	3.81392	3.81898	3.8212	3.82244	3.84142		0.015976	0.0131698	0.0435748	0.0481039	0.0254043	-0.016157	-0.0210871	0.00023524	-0.00281904	-0.0252484	-0.0705357	-0.0872275	-0.0862174	-0.0743067	-0.0511363	-0.0161442	0.0142535
		4.21659	4.175	4.12837	4.07374	4.01888	3.9626	3.89222	3.82725	3.73898	3.679	3.61756	3.59769	3.58839	3.62227	3.66756	3.72546	3.78212	3.82522	3.86356	3.88821	3.92155	3.939	3.95751	3.97055	3.98209	3.98197	3.98147	3.97826	3.98657	4.00444		0.010635	0.0175518	0.0165771	0.0222575	0.028788	0.0487559	0.0471208	0.0225001	-0.0348447	-0.0880967	-0.133938	-0.155425	-0.174455	-0.132623	-0.0628143	-0.0120931	0.0268119
		4.28203	4.3235	4.34424	4.342	4.32878	4.31613	4.29439	4.24579	4.22165	4.19769	4.2092	4.21294	4.2165	4.23444	4.24682	4.2625	4.2765	4.2756	4.27777	4.26786	4.27448	4.27552	4.27603	4.28865	4.29623	4.29933	4.30258	4.2985	4.30351	4.31142		-0.0260332	0.00591112	0.0154008	0.0116825	0.0151532	0.0354769	0.0252024	-0.0233349	-0.0654303	-0.070745	-0.0478636	-0.0313713	-0.0264819	-0.0201499	-0.00537495	0.00838507	0.022302
		4.49518	4.47853	4.47778	4.47671	4.47692	4.47951	4.46735	4.44827	4.42801	4.41981	4.38827	4.37039	4.35072	4.32824	4.31035	4.32508	4.3446	4.37225	4.39458	4.41474	4.43212	4.44014	4.45065	4.45315	4.45369	4.46049	4.47534	4.4927	4.48719	4.48048		0.00577324	-0.012926	-0.00618515	-0.00483256	0.00528785	0.0269946	0.0235908	0.00559573	0.00745811	0.00843593	0.00371428	-0.00152252	-0.0179779	-0.0488485	-0.0802304	-0.0667562	-0.0307297
		5.13077	5.08821	5.05445	5.04317	5.04322	5.02671	5.0338	5.08291	5.12094	5.12211	5.1356	5.14878	5.15036	5.15992	5.16282	5.17813	5.19236	5.19986	5.21137	5.21256	5.20312	5.18175	5.15921	5.13988	5.12026	5.08852	5.06444	5.04124	4.98551	4.9496		0.0485786	-0.00210626	-0.0302145	-0.00306721	-0.0118934	-0.0521349	-0.0322211	-0.00781485	-0.00511134	-0.0183189	-0.0158611	-0.00619667	-0.0126346	-0.0160412	-0.0208625	-0.0162517	-0.00988266
		4.52817	4.49615	4.47194	4.44305	4.41552	4.37061	4.31793	4.259	4.17788	4.08085	3.98602	3.89795	3.87066	3.86065	3.86853	3.88954	3.95156	4.02514	4.10684	4.18347	4.23707	4.26958	4.2936	4.31991	4.34818	4.36707	4.38856	4.41526	4.4403	4.49085		-0.0137798	-0.00781735	-0.00242002	0.00681677	0.0234454	0.0373752	0.0579798	0.0815597	0.057293	-0.0154415	-0.0894638	-0.162003	-0.149129	-0.11012	-0.118281	-0.121077	-0.100384
		3.82616	3.79063	3.75663	3.70721	3.67051	3.62996	3.59242	3.55617	3.54461	3.52501	3.52845	3.52843	3.53968	3.55092	3.57524	3.60894	3.61814	3.64477	3.64736	3.66214	3.66326	3.66991	3.66854	3.66011	3.65742	3.6596	3.65591	3.66169	3.65379	3.65555		0.0226452	0.0256394	0.0408703	0.0142679	0.0022411	-0.0119192	-0.0272634	-0.0458706	-0.0482436	-0.0567868	-0.0476181	-0.0608011	-0.063973	-0.0518343	-0.0243934	0.00549917	0.0161781
		4.97989	4.94379	4.93996	4.91357	4.89487	4.87866	4.85293	4.82722	4.79854	4.77483	4.75044	4.73218	4.7247	4.73122	4.74915	4.77823	4.80419	4.82996	4.84708	4.86037	4.8692	4.87745	4.8834	4.87607	4.86652	4.86299	4.86766	4.88388	4.89759	4.90353		0.022577	-0.013683	0.0189234	-0.0101304	0.00183372	0.0144123	0.0114412	0.00988961	-0.000992401	-0.0114925	-0.0211711	-0.0390825	-0.0545275	-0.0524336	-0.0336858	-0.00634478	0.0110829
		3.97475	3.96023	3.93812	3.91293	3.88867	3.86924	3.84734	3.82898	3.80176	3.78288	3.76466	3.73827	3.70578	3.66033	3.63723	3.61944	3.62793	3.6479	3.69143	3.75155	3.78272	3.82233	3.84156	3.85174	3.87092	3.89383	3.9184	3.93922	3.9572	3.98455		-0.00111636	0.00959387	0.0126909	0.00196338	-0.00285229	0.00124289	-0.00169144	0.00571335	-0.00399017	0.0122642	0.0281625	0.0219767	0.00990816	-0.0301257	-0.0653192	-0.106596	-0.115629
		5.73647	5.77453	5.85783	5.87537	5.86723	5.84353	5.81455	5.7846	5.7552	5.73081	5.7099	5.68565	5.66374	5.64935	5.64296	5.65568	5.68108	5.71194	5.73329	5.7536	5.76276	5.77024	5.77864	5.79177	5.79993	5.8092	5.8085	5.80695	5.81172	5.85091		-0.0259053	-0.0191824	0.020173	0.0293904	0.0163736	0.00686186	0.000566924	-0.00372301	-0.010111	-0.0062072	-0.000383867	-0.00731618	-0.0225783	-0.0399158	-0.0481764	-0.0418452	-0.0136352
		3.92711	3.91801	3.90732	3.88454	3.87392	3.85199	3.83444	3.80716	3.78239	3.75821	3.7473	3.74834	3.74393	3.75692	3.76808	3.77723	3.79381	3.80567	3.81681	3.82664	3.83211	3.83588	3.8428	3.85042	3.85564	3.86185	3.86376	3.85925	3.86407	3.87029		0.0101129	0.00296063	0.00917916	-0.00338635	0.0121595	0.0210091	0.0204488	0.00300432	-0.0263692	-0.0465942	-0.0461824	-0.0405653	-0.0361726	-0.025274	-0.0153746	-0.00968825	-0.00245271
		4.05328	4.00716	3.96843	3.91905	3.87574	3.82424	3.77841	3.73154	3.67485	3.60619	3.54357	3.5024	3.48827	3.48803	3.5125	3.5358	3.55838	3.59508	3.646	3.68019	3.71189	3.73822	3.76419	3.79097	3.81591	3.83867	3.85475	3.8746	3.90852	3.93149		0.0218693	0.00801605	0.0260264	0.0230628	0.0194405	0.0135809	0.0362454	0.0441505	0.022724	-0.0218657	-0.0926748	-0.135714	-0.112788	-0.0912872	-0.0528652	-0.0434588	-0.04424
		3.84494	3.84864	3.82726	3.84238	3.84739	3.83659	3.82802	3.80972	3.78673	3.75935	3.72845	3.69547	3.67158	3.65539	3.64883	3.66792	3.6818	3.71136	3.732	3.76346	3.79255	3.80828	3.82296	3.827	3.82927	3.8339	3.82549	3.82851	3.83764	3.86995		-0.00122427	-0.00685599	-0.0295026	-0.0150074	0.0152178	0.0197153	0.0283583	0.0312989	0.0229501	0.00866724	-0.0157184	-0.0424869	-0.0657744	-0.0791073	-0.0872244	-0.0681884	-0.0520272
		4.74285	4.7136	4.67003	4.63742	4.62651	4.60845	4.58737	4.57421	4.55674	4.5485	4.52297	4.48894	4.44471	4.40427	4.36665	4.3551	4.36014	4.38788	4.4269	4.47885	4.52097	4.56067	4.59099	4.61662	4.63586	4.65136	4.6674	4.6815	4.69909	4.72366		0.0141118	0.0191931	-0.00985468	-0.0293353	-0.00157674	-0.00155103	-0.0114398	-0.00363294	0.00112118	0.0321718	0.0417446	0.0282207	-0.00519478	-0.0461882	-0.0826505	-0.100487	-0.0844895
		4.43712	4.42691	4.3931	4.36803	4.34687	4.3238	4.30107	4.2676	4.24094	4.2086	4.16749	4.11689	4.08154	4.05004	4.04042	4.05258	4.08458	4.12788	4.17668	4.21724	4.24784	4.27735	4.28735	4.30587	4.30449	4.32403	4.34022	4.36396	4.39203	4.45505		-0.00329611	0.0212659	-0.0023642	-0.0123993	0.00324558	0.0137546	0.0147376	0.0113343	0.0238002	0.0261503	0.0184279	-0.0220025	-0.0577687	-0.0971457	-0.113112	-0.0958826	-0.0574397
		4.19082	4.2107	4.22231	4.22219	4.20367	4.19942	4.20642	4.20743	4.2076	4.22191	4.22937	4.22971	4.22974	4.23131	4.23239	4.23075	4.22848	4.2252	4.22236	4.21796	4.20849	4.20109	4.19685	4.19272	4.19739	4.20787	4.21702	4.22371	4.22806	4.22763		-0.0035069	0.00468981	0.0168645	0.0145257	-0.023636	-0.0310515	-0.00691488	-0.0171032	-0.0182586	-0.00265238	0.0140039	0.00770453	-0.000605407	0.000524938	0.00169996	0.00105256	0.00037867
		3.78564	3.76596	3.77073	3.77247	3.74643	3.71605	3.69318	3.66602	3.64717	3.61102	3.58098	3.53696	3.48698	3.44566	3.40676	3.37884	3.36804	3.3966	3.43553	3.4989	3.55349	3.61561	3.6538	3.69105	3.73045	3.74937	3.77927	3.80809	3.8351	3.87672		-0.00804147	-0.0340868	0.00065693	0.0379919	0.016765	-0.00718468	-0.00810239	0.00837212	0.0311651	0.0322183	0.0348565	0.0173294	-0.0130447	-0.0519323	-0.0950873	-0.136845	-0.168469
		3.65077	3.65899	3.64347	3.628	3.61948	3.62518	3.60754	3.59453	3.57833	3.54725	3.52237	3.50867	3.49595	3.50214	3.51591	3.54808	3.58531	3.6098	3.63248	3.65575	3.66717	3.68145	3.68095	3.68113	3.67278	3.63906	3.61894	3.58074	3.54059	3.51029		-0.00529567	0.0303712	0.00768813	-0.014361	-0.00810161	0.0189982	0.036642	0.0468927	0.0231171	-0.00800496	-0.0426159	-0.0713442	-0.0954814	-0.0887096	-0.0670152	-0.0354536	-0.00154199
		3.9684	3.94694	3.94226	3.92702	3.92413	3.9194	3.92638	3.92945	3.93227	3.93181	3.92114	3.90643	3.88533	3.85907	3.82366	3.79122	3.76249	3.75764	3.77279	3.80699	3.84207	3.86537	3.89023	3.91583	3.94911	3.96105	3.97224	3.98549	4.00195	4.0128		0.00417187	-0.00923293	-0.00305294	-0.0157642	-0.0265934	-0.026932	-0.0133995	0.00255827	0.015116	0.0212238	0.0294585	0.0340414	0.0328847	0.0152149	-0.0144546	-0.0591028	-0.108387
		3.79955	3.74563	3.69598	3.66381	3.62922	3.6026	3.56989	3.54233	3.5024	3.47111	3.42869	3.39732	3.37456	3.35891	3.35972	3.37186	3.39559	3.42084	3.45396	3.48685	3.51644	3.54211	3.56887	3.59582	3.61831	3.63974	3.65581	3.67248	3.68884	3.67088		0.0438226	0.019062	-0.0129012	0.0018065	0.0111856	0.0165709	0.0251192	0.0288572	0.00933286	0.00852487	-0.0229814	-0.0523877	-0.0654726	-0.0813223	-0.0815961	-0.0675828	-0.0416934
		4.81504	4.81078	4.82106	4.82401	4.81932	4.81763	4.80888	4.79684	4.7901	4.77275	4.76684	4.75066	4.74422	4.72399	4.71061	4.69872	4.68895	4.68288	4.67898	4.67153	4.66951	4.68598	4.71923	4.76122	4.79835	4.82829	4.85497	4.87666	4.8906	4.89677		-0.00284536	-0.0143264	-0.00162331	0.00906173	0.00169932	-4.11019e-05	0.00803779	0.00305422	0.00385079	-0.00735692	-0.00104907	0.00415784	0.00420019	-0.006732	-0.00713778	-0.014567	-0.0128676
		3.96482	4.00287	3.98207	4.01665	3.99498	3.97349	3.92939	3.91242	3.88423	3.86929	3.86482	3.85903	3.83426	3.78594	3.73637	3.69101	3.67323	3.68047	3.71387	3.75133	3.80418	3.863	3.91145	3.94671	3.96934	4.00033	4.01291	4.03065	4.05183	4.06869		-0.0230153	-0.000866407	-0.0469931	0.0526656	0.0363137	0.00513753	-0.0199599	-0.038155	-0.0606141	-0.0166251	0.0017436	0.0660774	0.0579074	0.0100675	-0.0519796	-0.133182	-0.148235
		4.48214	4.44056	4.39326	4.34511	4.31105	4.27177	4.2342	4.1925	4.16615	4.12595	4.0987	4.0623	4.05144	4.02803	4.03324	4.03763	4.06503	4.10042	4.12682	4.16458	4.1994	4.22296	4.24384	4.25945	4.27195	4.29304	4.31628	4.34598	4.3795	4.40832		0.0189263	0.0243801	0.0168098	-0.000845658	0.00960318	0.00985685	0.00680904	0.00258798	0.00300232	-0.00701727	-0.0119804	-0.0283674	-0.037109	-0.0588593	-0.0610931	-0.0562342	-0.0355959
		3.7629	3.73085	3.68831	3.64714	3.61751	3.58698	3.55242	3.52205	3.49373	3.45741	3.42474	3.37947	3.34225	3.29165	3.23657	3.194	3.17208	3.17701	3.21184	3.26482	3.34623	3.41861	3.50363	3.56633	3.62407	3.67429	3.73133	3.78711	3.82218	3.86122		0.0107212	0.022785	-0.00605477	-0.0108592	-0.00342129	0.00161828	0.00293055	0.00139453	0.0181221	0.0177754	0.0287971	0.0295433	0.0200891	-0.00468963	-0.0713722	-0.129682	-0.166367
		4.65899	4.63451	4.61434	4.59045	4.56064	4.53283	4.49525	4.44688	4.40598	4.35691	4.32264	4.28349	4.23474	4.17912	4.1408	4.11175	4.10683	4.13034	4.15966	4.2042	4.27831	4.34461	4.42307	4.4862	4.54215	4.58658	4.63087	4.67596	4.70835	4.7395		-0.0104697	-0.00646598	0.00347217	0.00390071	0.00239903	0.0140689	0.0142706	-0.00278302	-0.0144266	-0.00882569	0.0128566	0.0180963	-0.00468412	-0.0442837	-0.0828822	-0.0992869	-0.112524
		4.09657	4.06516	4.04449	4.04953	4.06014	4.05402	4.07533	4.06756	4.07703	4.06356	4.04758	4.00932	3.95646	3.91682	3.87759	3.8376	3.80282	3.76149	3.72486	3.74929	3.80757	3.87995	3.95009	4.02592	4.0743	4.12662	4.17978	4.23354	4.27597	4.32503		-0.00292091	0.0112901	-0.0327408	-0.0346125	-0.0235367	-0.033451	-0.0245941	-0.00109711	0.0328154	0.0537295	0.051226	0.0365912	0.00300739	-0.0209651	-0.0239911	-0.0223858	-0.0444884
		4.32961	4.43668	4.51057	4.53015	4.53741	4.52694	4.51777	4.48624	4.48881	4.4747	4.45189	4.44627	4.40693	4.3808	4.36971	4.33448	4.32149	4.30517	4.29359	4.30292	4.33386	4.37366	4.41161	4.44787	4.47823	4.48904	4.508	4.54068	4.55203	4.56768		-0.0639874	-0.026062	0.0225653	0.0170106	0.0255446	0.0125833	-0.0117074	-0.02807	-0.00448102	0.011293	0.0136646	0.00842091	-0.00871927	-0.0203119	-0.0170292	-0.0330944	-0.0410403
		4.34684	4.31136	4.29118	4.27027	4.25014	4.23512	4.21995	4.21515	4.20281	4.1864	4.16937	4.15512	4.1425	4.10708	4.058	4.003	3.93866	3.9185	3.93623	3.99833	4.0688	4.13386	4.18884	4.23374	4.27466	4.29286	4.31982	4.34305	4.37227	4.4038		0.00529082	-0.0121624	-0.00128343	-0.0124175	-0.0173768	-0.0199429	-0.0199761	-0.000832015	0.00310014	-0.00234351	-0.00471676	0.021204	0.0507403	0.0573158	0.0259684	-0.0413717	-0.152873
		4.10942	4.10969	4.12575	4.1266	4.11874	4.11266	4.10667	4.10378	4.09674	4.08636	4.06885	4.05433	4.0334	4.00857	3.97714	3.93783	3.89837	3.86083	3.84699	3.86216	3.90347	3.95778	4.01227	4.06772	4.11571	4.15458	4.18153	4.23329	4.27271	4.30976		-0.00846376	-0.0263107	0.00170327	0.00784883	-0.00588864	-0.0140468	-0.00503285	0.00432209	0.0102384	0.0133769	0.0127932	0.0186415	0.0240223	0.0295298	0.0233407	-0.00274398	-0.0560205
		3.5111	3.4642	3.43258	3.3967	3.35924	3.33189	3.31176	3.28806	3.26593	3.23724	3.20695	3.17592	3.1399	3.10479	3.07314	3.0463	3.02937	3.03084	3.04968	3.08646	3.13874	3.2001	3.26356	3.32487	3.38442	3.39382	3.39557	3.44663	3.45271	3.51067		0.0378664	0.0181298	0.0152997	0.00913335	-0.0064401	-0.00507786	0.0065667	0.0181881	0.0327112	0.0312343	0.0184146	0.0181173	0.0169346	-0.0133154	-0.0485909	-0.0866451	-0.112599
		4.13673	4.09656	4.06813	4.05015	4.03599	4.02063	4.01095	3.99726	3.97533	3.93945	3.88805	3.8261	3.76152	3.67467	3.58267	3.49339	3.42861	3.36892	3.35362	3.41656	3.53191	3.65633	3.785	3.93164	4.05861	4.16969	4.26818	4.35381	4.41681	4.46619		-0.00157467	-0.0104299	-0.0253709	-0.0205554	-0.017636	-0.01805	-2.24464e-06	0.0267288	0.0461106	0.059753	0.0565855	0.0459413	0.0395616	0.0132648	-0.0257781	-0.083171	-0.15043
		4.80511	4.79038	4.77225	4.75761	4.72461	4.71135	4.69042	4.67486	4.66343	4.65	4.62383	4.60124	4.57133	4.55079	4.51666	4.47441	4.43457	4.40874	4.36871	4.3588	4.39462	4.48067	4.56887	4.65065	4.72527	4.7888	4.84975	4.89443	4.93591	4.98073		-0.00654438	-0.010323	-0.00370534	1.15896e-05	-0.00852553	-0.0135516	-0.0225878	-0.0136823	0.00353899	0.00935075	-0.00053345	-0.00512518	-0.00718734	0.015207	0.011375	-0.0094964	-0.0300704
		4.0619	3.99622	3.9408	3.89969	3.85564	3.83478	3.8262	3.80816	3.80094	3.79601	3.79445	3.80126	3.80645	3.79561	3.77696	3.74888	3.72099	3.68966	3.65612	3.63711	3.63102	3.64201	3.69711	3.77621	3.86159	3.93159	3.98971	4.04864	4.11326	4.19204		0.0449443	0.0143614	-0.0119218	-0.023117	-0.0381937	-0.037478	-0.0234765	-0.0255146	-0.0364052	-0.0360167	-0.0331657	-0.00166823	0.0294009	0.0335025	0.0319222	0.0138421	-0.00392345
		5.30446	5.27355	5.2497	5.24946	5.23711	5.23558	5.22081	5.20564	5.17893	5.16311	5.12987	5.10741	5.08614	5.05148	5.01377	5.00597	4.99806	5.00043	4.98752	4.98474	4.9928	4.9951	4.973	5.03716	5.14371	5.28854	5.3847	5.43454	5.48492	5.52471		0.009801	-0.00658922	-0.0291374	-0.00398291	-0.00556274	0.00406513	0.00648438	0.00932017	0.00183814	0.000737804	-0.00632773	0.00378337	0.00734293	-0.014224	-0.0519348	-0.0372545	-0.00611236
		4.29776	4.36041	4.38764	4.37307	4.36324	4.35309	4.33807	4.31848	4.29945	4.29677	4.3037	4.30291	4.30691	4.29649	4.28597	4.27572	4.26136	4.23427	4.2167	4.19082	4.17671	4.17985	4.20859	4.25191	4.29513	4.3372	4.38802	4.4448	4.49074	4.53002		-0.0313524	-0.00324737	0.0181955	-0.00166952	-0.00409067	0.0048728	0.00145888	-0.025152	-0.0460648	-0.0398379	-0.0143298	0.00772587	0.0119407	0.00718878	0.00485706	0.0137104	0.00805533
		4.09638	4.10022	4.09584	4.08997	4.09183	4.08968	4.09437	4.09367	4.0987	4.08714	4.08669	4.08792	4.07572	4.07024	4.05427	4.03399	4.00022	3.95683	3.90955	3.86143	3.8355	3.85992	3.92085	3.99602	4.06314	4.12748	4.19128	4.24521	4.30567	4.36319		-0.014341	-0.00554088	-0.00717937	-0.0229217	-0.0181213	-0.0169714	-0.0149734	-0.00508714	-0.00421337	-0.0134994	-0.0083938	0.000230673	0.0116392	0.021605	0.0288	0.0359717	0.0320576
		3.64922	3.63464	3.63994	3.64091	3.66384	3.69483	3.71303	3.72546	3.74762	3.75532	3.76783	3.76803	3.77234	3.76974	3.776	3.77225	3.76398	3.75906	3.74276	3.73048	3.70781	3.70177	3.70358	3.68598	3.68469	3.66473	3.63316	3.6289	3.62478	3.68863		0.00792007	-0.013222	-0.0270433	-0.0339972	-0.0247063	-0.0179446	-0.00780807	-0.00558907	0.0101235	0.0117115	0.008039	0.000144414	-0.00533039	-0.00654083	0.00490781	0.0137583	0.0168326
		3.87298	3.86812	3.8627	3.86937	3.88159	3.89447	3.91888	3.93467	3.95662	3.97686	3.98939	4.00131	4.00728	4.01259	4.01296	4.02492	4.02895	4.03107	4.03673	4.03784	4.04403	4.04727	4.04081	4.02012	4.00197	3.96805	3.91879	3.78705	3.66417	3.72697		0.00890452	-0.00970098	-0.0172115	-0.0191415	-0.0218446	-0.0250626	-0.020822	-0.0152524	-0.00673121	0.003092	0.0081268	0.0064919	-0.000302793	-0.00788436	-0.0161902	-0.0114782	-0.00729296
[truncated: 43 more columns]

## Sheet: 2g
Rows correspond to individual particles
Fraction engulfed	Cumulative fraction of particles
0.0813	0
0.1542	0.0149
0.2245	0.0299
0.2477	0.0448
0.2551	0.0597
0.2626	0.0746
0.2688	0.0896
0.2743	0.1045
0.2782	0.1194
0.2798	0.1343
0.3099	0.1493
0.3149	0.1642
0.3658	0.1791
0.3858	0.194
0.4418	0.209
0.4601	0.2239
0.4948	0.2388
0.5042	0.2537
0.5096	0.2687
0.5213	0.2836
0.5269	0.2985
0.536	0.3134
0.545	0.3284
0.5456	0.3433
0.546	0.3582
0.5512	0.3731
0.552	0.3881
0.5584	0.403
0.5666	0.4179
0.5787	0.4328
0.5854	0.4478
0.5854	0.4627
0.5888	0.4776
0.6506	0.4925
0.6522	0.5075
0.6523	0.5224
0.6669	0.5373
0.6783	0.5522
0.6851	0.5672
0.6868	0.5821
0.7059	0.597
0.7081	0.6119
0.7096	0.6269
0.7172	0.6418
0.7253	0.6567
0.7359	0.6716
0.7431	0.6866
0.7479	0.7015
0.7715	0.7164
0.7813	0.7313
0.7841	0.7463
0.7842	0.7612
0.7926	0.7761
0.8035	0.791
0.8094	0.806
0.8153	0.8209
0.8164	0.8358
0.8203	0.8507
0.8216	0.8657
0.8221	0.8806
0.8327	0.8955
0.8453	0.9104
0.8639	0.9254
0.8725	0.9403
0.893	0.9552
0.9001	0.9701
0.9809	0.9851
0.9936	1

## Sheet: 2h
Fraction engulfed	Sphericity	Relative elongation
0.0813	0.9982	0.9977
0.1542	0.9979	0.9827
0.2245	0.9964	0.9918
0.2477	0.998	1.0086
0.2551	0.9953	0.9936
0.2626	0.996	1.002
0.2688	0.9973	1.0149
0.2743	0.9977	0.9658
0.2782	0.9962	1.0247
0.2798	0.999	1.0039
0.3099	0.9966	0.9981
0.3149	0.9981	1.0222
0.3658	0.9984	0.9923
0.3858	0.9964	0.9804
0.4418	0.998	0.9911
0.4601	0.9964	1.0409
0.4948	0.9944	1.0277
0.5042	0.9968	1.0077
0.5096	0.9971	1.0073
0.5213	0.9924	1.0307
0.5269	0.9958	1.0545
0.536	0.9887	1.0565
0.545	0.9935	1.0417
0.5456	0.9961	1.0705
0.546	0.9972	1.0133
0.5512	0.9971	1.0206
0.552	0.9964	1.0423
0.5584	0.9983	0.9735
0.5666	0.9946	1.0552
0.5787	0.9946	0.9479
0.5854	0.9956	1.0659
0.5854	0.9895	1.0926
0.5888	0.9952	0.9958
0.6506	0.9962	1.0248
0.6522	0.9936	0.9701
0.6523	0.9877	1.1372
0.6669	0.9943	1.0342
0.6783	0.9975	1.0354
0.6851	0.9924	1.0858
0.6868	0.9967	1.0178
0.7059	0.9973	1.0276
0.7081	0.9921	1.1216
0.7096	0.9955	1.0422
0.7172	0.9953	1.0783
0.7253	0.9948	1.0885
0.7359	0.9974	0.991
0.7431	0.9925	1.1136
0.7479	0.9951	1.0035
0.7715	0.9962	1.0355
0.7813	0.9955	1.1026
0.7841	0.9975	1.0331
0.7842	0.9907	1.0548
0.7926	0.9958	1.0921
0.8035	0.9891	1.1541
0.8094	0.9902	1.1158
0.8153	0.9878	1.058
0.8164	0.9942	1.0008
0.8203	0.9934	1.0728
0.8216	0.9951	1.0519
0.8221	0.9869	1.1287
0.8327	0.9736	1.1406
0.8453	0.9912	1.0775
0.8639	0.9907	1.0986
0.8725	0.9885	1.078
0.893	0.9953	1.0228
0.9001	0.9933	1.0405
0.9809	0.9946	0.9695
0.9936	0.9942	0.9425

## Sheet: 2i
Fraction engulfed	Constriction localization	Constriction magnitude	F-actin peak localization	F-actin peak intensity
	normalized to phagocytic axis length (L)	(mm)	normalized to phagocytic axis length (L)	x10^4 (a.u.)
* NaN indicates that no constriction/F-actin peak was detectable
0.0813	NaN	NaN	NaN	NaN
0.1542	0.0331	0.1192	0.0331	1.0664
0.2245	0.167	0.0748	0.0668	0.4192
0.2477	0.101	0.0367	0.101	0.5754
0.2551	0.232	0.1296	0.2651	0.8155
0.2626	0.1344	0.1236	0.1344	0.4869
0.2688	0.0679	0.0288	0.1018	0.2616
0.2743	0.1321	0.1085	0.1321	0.3542
0.2782	0.1371	0.0427	0.2057	0.6731
0.2798	0.0672	0.0098	0.0336	0.5997
0.3099	0.2028	0.1026	0.2028	0.6199
0.3149	0.1707	0.0578	0.1707	0.4483
0.3658	0.199	0.041	0.199	0.4538
0.3858	0.2335	0.0772	0.2335	0.4449
0.4418	0.1672	0.0578	0.2007	0.5687
0.4601	0.3836	0.0582	0.0349	1.0904
0.4948	0.3792	0.2055	0.3447	0.8362
0.5042	0.2711	0.1279	0.2711	0.5331
0.5096	0.304	0.0794	0.304	0.3609
0.5213	0.3114	0.2231	0.3114	0.6351
0.5269	0.3815	0.1986	0.3815	0.2985
0.536	0.3521	0.3246	0.3521	0.8284
0.545	0.3488	0.2017	0.3488	0.3186
0.5456	0.3167	0.1456	0.2815	0.8468
0.546	0.4027	0.0724	0.3691	0.2423
0.5512	0.2721	0.0796	0.2721	0.3757
0.552	0.3792	0.1266	0.3792	0.3391
0.5584	NaN	NaN	0.2962	0.3382
0.5666	0.4174	0.2568	0.4174	0.5452
0.5787	NaN	NaN	0.4166	0.3693
0.5854	0.419	0.1853	0.3491	0.7333
0.5854	0.4229	0.3264	0.4581	0.6339
0.5888	0.3002	0.0966	0.1001	0.58
0.6506	0.4731	0.1282	0.4731	0.189
0.6522	0.1648	0.1068	0.4945	0.4913
0.6523	0.4673	0.3977	0.5392	0.5263
0.6669	0.3128	0.1213	0.2433	0.4432
0.6783	0.4096	0.126	0.3754	0.2546
0.6851	0.5228	0.2048	0.5576	0.4588
0.6868	0.4688	0.1215	0.4688	0.8597
0.7059	0.4091	0.0861	0.3409	0.5072
0.7081	0.4695	0.2446	0.3612	0.4421
0.7096	0.4758	0.1413	0.4418	0.7148
0.7172	0.5221	0.2235	0.5569	0.4523
0.7253	0.4913	0.2271	0.4562	0.6163
0.7359	0.7705	0.0269	0.4355	0.3762
0.7431	0.5658	0.2811	0.5658	1.0991
0.7479	0.3956	0.1089	0.3956	0.3831
0.7715	0.5834	0.1422	0.5491	0.3825
0.7813	0.4596	0.1903	0.4596	0.8605
0.7841	0.6795	0.108	0.1019	0.1341
0.7842	0.5494	0.2368	0.2747	0.4667
0.7926	0.4592	0.1773	0.4592	0.1721
0.8035	0.5841	0.3164	0.6572	0.688
0.8094	0.5692	0.3291	0.6047	0.4879
0.8153	0.6324	0.2629	0.6676	0.6716
0.8164	0.5984	0.1388	0.5651	0.546
0.8203	0.5945	0.2843	0.6295	0.6313
0.8216	0.6261	0.2281	0.6609	1.1208
0.8221	0.5697	0.2092	0.6053	0.641
0.8327	0.6677	0.5534	0.6677	2.0336
0.8453	0.6698	0.2935	0.6698	0.5883
0.8639	0.7277	0.2041	0.7277	0.6606
0.8725	0.7703	0.1894	0.7353	0.4131
0.893	0.682	0.1258	0.682	0.4239
0.9001	0.6978	0.2392	0.6978	1.0507
0.9809	0.9247	0.0911	0.9247	0.6068
0.9936	0.9043	0.3081	0.9043	0.4418
