# Supplementary material for: Phagocytic ‘teeth’ and myosin-II ‘jaw’ power target constriction during phagocytosis
Source: eLife. 2021 Oct 28;10:e68627. doi: 10.7554/eLife.68627 (PMC8585483; doi:10.7554/eLife.68627)
Supplement: Figure 3—source data 1. [file elife-68627-fig3-data1.xlsx]

## Sheet: 3d CK666
	Mean curvature deviation per bin (mm^-1)																															Mean fluorescent intensity per bin (a.u.)
bin index	1	2	3	4	5	6	7	8	9	10	11	12	13	14	15	16	17	18	19	20	21	22	23	24	25	26	27	28	29	30		1	2	3	4	5	6	7	8	9	10	11	12	13	14	15	16	17	18
normalized cup position of bin centre	0.0166667	0.05	0.0833333	0.116667	0.15	0.183333	0.216667	0.25	0.283333	0.316667	0.35	0.383333	0.416667	0.45	0.483333	0.516667	0.55	0.583333	0.616667	0.65	0.683333	0.716667	0.75	0.783333	0.816667	0.85	0.883333	0.916667	0.95	0.983333		0.0166667	0.05	0.0833333	0.116667	0.15	0.183333	0.216667	0.25	0.283333	0.316667	0.35	0.383333	0.416667	0.45	0.483333	0.516667	0.55	0.583333
Rows correspond to individual particles
*DMSO data provided in source data - figure 2 - sheet panel f
-0.0115668	-0.0087588	0.00521375	0.00356712	0.00400746	0.00623393	-0.00031282	0.000269478	0.00390218	0.0115559	0.00642327	-0.00490821	-0.00699097	0.00685943	0.0110113	0.00321361	-0.0130806	-0.0109927	0.00333245	0.00541557	-0.00811225	-0.010072	0.00241782	0.00767083	0.00379033	-0.000984678	-0.000220784	-0.000648536	-0.00811209	0.00977985			809.28	2344.26	3130.52	2966.64	1935.18	775.302	274.119	144.218	186.846	250.098	296.949	362.908	472.041	467.082	445.058	430.787	410.71	378.484
-0.00472462	0.00522005	-0.00195254	-0.00988296	0.00338659	0.00684884	-0.00402903	0.00703241	0.00893846	0.0133984	0.00981456	0.00208566	-0.00382559	0.00139735	0.00614095	0.0107566	0.0150448	0.00917503	0.00111412	-0.012802	-0.00781047	0.00191819	-0.00236306	-0.00867838	-0.0101744	-0.00616161	0.00616595	0.0095239	0.0064066	0.00824025			2333.76	3647.69	4128.75	4214.85	3699.92	2957.95	1755.86	679.163	158.124	72.2189	46.1712	42.9808	45.148	46.082	43.0252	34.6697	26.9658	21.321
0.0338316	-0.0151319	-0.0104331	0.00318885	0.00724903	-0.00727755	-0.0286526	-0.00154906	0.0176509	0.0208508	0.0154534	0.00402722	-0.000440278	-0.0113736	-0.0116133	-0.00733939	-0.00409987	-0.00265127	-0.00753819	-0.00148814	-0.00813004	-0.0109529	-0.0115031	-0.0155724	0.00116137	0.0172296	0.0192097	0.00987772	-0.0331595	0.0405275			448.562	539.165	1210.82	2207.85	3025.78	3186.99	2614.99	1519.74	749.265	376.545	187.796	106.242	44.9944	29.543	40.5369	51.397	59.2456	71.6666
-0.00771161	0.00727733	0.00413251	0.00148146	-0.0140662	-0.00969419	-0.00173221	0.00347518	-0.00835275	-0.0135698	-0.00976833	0.00444465	0.0120673	0.00937173	0.004512	-0.00426808	0.0023226	0.00952604	0.00862978	0.00688161	-0.00853679	-0.00913353	-0.0179605	-0.0146218	0.00157807	0.015533	0.0110056	-0.0144869	-0.0261748	0.0190525			906.269	1058.04	1270.54	1539.13	1592.17	1626.02	1383.52	976.986	681.669	325.071	143.182	66.5063	37.6042	34.6002	29.761	32.6511	29.3081	22.9142
0.0127733	0.00350395	-0.00523652	-0.0206108	-0.0131406	0.00103525	-0.00534112	-0.00300569	0.00477666	0.013921	0.00955726	-0.00095353	-0.0164762	-0.0227015	-0.00628477	0.00226731	0.00477639	-0.000530512	-0.00185214	-0.00321047	-0.00428128	-0.00882348	-0.0126337	-0.00456146	0.00345534	0.00408308	-0.0017014	0.00771557	0.000719186	-0.00798875			1512.35	2292.47	2871.26	3191.58	3392.25	3353.59	3133.52	2700.1	2022.83	1110.8	512.58	163.455	73.2288	41.0723	35.46	34.063	22.6171	19.395
0.0289525	0.0197739	0.000694786	-0.0195585	-0.0301281	-0.0283748	-0.0155767	-0.00896444	0.00555453	0.00915616	0.00274366	0.00440374	-0.00977163	-0.0201561	-0.021646	-0.0189162	-0.00513131	-0.00215152	0.00221377	-0.0133719	-0.0322494	-0.0320289	-0.0104724	0.0130665	0.0215972	0.0125944	0.00739423	0.00762343	-0.0165355	-0.0182781			3349.44	3645.14	5109.03	6732.1	6975.63	6891.59	6392.71	5166.75	3108.08	1679.47	668.002	189.941	108.251	95.556	129.946	248.595	315.506	350.317
0.0202883	0.00236021	-0.0106288	-0.0151822	-0.01063	-0.00291207	-0.010822	-0.00827568	0.00533949	0.0227275	0.0220567	0.0128311	0.00383424	-0.00854221	-0.0087443	-0.000481724	0.00297902	0.00349729	0.00217834	-0.00271239	-0.00629984	0.000745694	-0.00190362	-0.00483433	-0.00215036	-0.00446034	0.00314395	-0.0136007	-0.00486394	0.0345155			435.724	854.058	1197.99	1488.98	1584.31	1467.12	1192.46	882.904	567.972	286.874	146.185	102.595	77.382	80.7875	80.7139	65.3877	37.8211	26.4831
-0.00167912	-0.0138431	0.00218224	0.00901422	0.00952797	-0.0073514	-0.0121591	-0.0111678	0.0083589	0.00969665	0.00840332	0.00367866	-0.00318644	-0.00492572	0.00124112	-0.000289831	0.00107177	-0.00759425	-0.00713265	-0.00804524	-0.00179932	0.00576009	0.0110628	0.00757864	-0.000147885	-0.00927634	-0.0105316	0.00299141	0.00181735	-0.00380892			2365.24	2380.05	2951.94	3694.7	3724.28	3358.48	2646.09	2187.93	1687.83	1356.12	1064.46	908.056	706.351	387.76	163.107	53.1003	26.5481	22.9015
0.0202613	-0.00827466	-0.0269459	-0.0200871	-0.00311927	0.00511147	-0.000644883	-0.00406312	0.00231411	0.0102062	0.0121154	0.00422895	-0.00771025	-0.00947693	-0.00964291	-0.00515967	-0.000815669	0.00387777	0.00366362	0.00539659	0.00244303	-0.00467391	-0.00854358	-0.0106119	-0.00175448	0.00362152	0.0018913	-0.00473541	-0.0217664	0.00722724			893.433	1209.98	1470.35	1755.05	2049.28	2175.32	1980.09	1680.83	1310.55	857.991	552.005	357.098	265.719	225.16	184.776	163.424	145.999	125.818
0.0143168	0.00406629	0.000977625	-0.0209676	-0.016257	0.00936985	0.00521038	0.00725764	0.000267428	-0.00173096	-0.00612559	-0.00337896	0.00551617	0.0128453	0.00959106	0.00653658	0.00401564	0.00214115	-0.00611527	-0.0149586	-0.0109626	-0.0180785	-0.0163683	-0.00166283	0.0119102	0.00470185	-0.00030224	-0.00497308	0.00353457	0.0244306			536.189	944.862	1297.11	1628.54	1715.22	1483.83	1316.79	1231.91	1206.08	975.169	665.152	327.412	148.491	66.0735	36.9783	37.8211	37.9504	36.9148
-0.018516	0.0023556	0.010195	-0.00412718	-0.00915646	-0.00312426	-0.00637367	-0.0134767	-0.00972604	-0.0029269	0.00244936	0.00417366	0.00535377	0.00795345	0.00698424	0.00263848	0.00369492	0.00783984	0.0100331	0.0110622	0.00641491	-0.00125448	-0.0101898	-0.00184282	-0.000510364	-0.00431665	-0.0107145	-0.00461705	0.00538369	-0.0272159			342.398	475.299	1234.84	2865.44	4565.52	5402.38	5587.87	4709.66	3270.31	2023.67	1164.49	601.704	250.375	97.8758	58.661	48.1872	57.3358	65.9326
0.0179589	0.00178641	-0.00911702	-0.0177971	-0.0211735	0.00316004	0.00512519	-0.0032037	-0.00239571	0.00938595	0.0135429	0.00566819	0.00424922	0.000243274	-0.00111073	-0.00380539	-0.00342336	-0.00273098	-0.00176958	-0.00126982	0.00374354	0.00204184	0.000912547	-0.00656462	0.00542633	0.010994	-0.0238942	-0.0217803	0.00857543	0.0192151			960.244	955.463	1126.21	1454.81	1660.13	1560.06	1603.02	1538.12	1376.62	1422.48	1201.88	965.118	649.858	458.98	209.607	112.828	45.4629	27.9481
0.00804358	0.0105595	-0.00777218	-0.00519704	0.00166363	0.00207697	0.00359426	-0.0010896	-0.00836885	-0.00273197	0.00388683	0.00488311	0.00315114	-0.000103601	0.00172725	-0.000449811	-0.000342095	0.000330001	0.00391366	0.00997471	0.00661425	-0.000511517	-0.00584241	-0.00558828	-0.00442728	0.00171389	0.00369257	0.000248333	0.000432836	0.00735818			647.642	697.568	1039.07	1615.38	2231.07	2683.39	2800.29	2686.36	2716.98	2263.65	1762.23	1535.54	1136.91	617.021	305.994	152.077	60.3355	37.3753
0.0243041	0.00245673	-0.0132729	-0.0185284	-0.00764145	0.010829	0.00788723	-0.00373989	-0.0105776	0.00121378	0.00535796	-0.00160821	-0.00485255	-0.00621172	-0.00416456	0.00293469	0.000591938	-0.00676738	-0.00814108	0.000363833	0.00749349	0.013788	0.0038299	-0.0128245	-0.0122025	-0.00149131	0.0069247	0.00343641	-0.0121871	0.0133016			537.484	1521.58	2182.18	2731.73	2628.72	2509.05	2705.36	2730.22	2422.75	1777.12	1253.87	989.516	818.59	557.462	456.776	230.928	110.594	42.2666
0.0341392	-0.0212933	0.00148934	0.00538875	0.0177879	0.0176237	-0.00106664	-0.0335871	-0.0360313	-0.0477141	-0.0408837	-0.0193261	0.0109598	0.0237488	0.0106179	0.00339354	0.0119229	0.0197883	0.0336436	0.0283809	0.00374319	-0.0243565	-0.0183932	-0.00583552	-0.0115412	-0.0210252	-0.00441982	0.00876224	-0.0173618	0.00494584			201.932	168.022	143.268	137.998	251.031	759.751	2115.6	3951.86	4827.14	5271.3	4693.79	3111.66	1878.67	1036.85	481.067	143.867	60.2634	40.356
0.0194725	0.00512787	0.0284022	0.0161064	-0.0210621	-0.0465862	-0.0319056	-0.0127657	-0.00876288	-0.0137425	-0.000156966	0.0159254	0.021641	0.0171709	0.01178	0.00617682	0.00412011	0.00485942	0.00254897	-0.00342943	-0.00573685	-0.00959277	-0.0066148	-0.00397083	-0.00652354	-0.00235707	0.00372627	-0.00164059	-0.00586862	0.0106725			392.139	758.301	1889.47	4461.62	6908.91	7925.59	8033.48	8342.1	7573.41	6666.29	5379.87	3469.07	1861.6	844.857	249.071	15.9919	-42.7982	-38.1221
0.0201901	-0.000806844	-0.0161757	-0.0277945	-0.0079428	-0.00735487	-0.00470991	-0.00711492	-0.00066249	-0.000145355	-0.000317573	0.000787902	0.00630527	0.013138	0.00760011	0.0147271	0.0144973	0.0103153	0.0015508	0.00438779	0.000691295	-0.00514976	-0.0097719	-0.015044	-0.0148829	-0.0101405	-0.0181536	-0.00571578	0.0073332	0.0107885			361.838	567.439	967.472	1253.56	1275.81	1400.8	1566.37	1819.58	2003.15	2019.55	1912.93	1528.99	1181.57	741.135	436.549	232.78	88.8298	43.2168
0.0409905	0.000895042	-0.00202725	0.0132162	-0.00254235	-0.0208258	-0.0122414	-0.0109798	-0.0107296	-0.0160507	-0.0139565	0.00140225	0.0123461	0.0099401	0.00776925	0.00480349	0.00638471	0.00566658	0.00563138	0.00238323	0.0051084	0.00756733	0.00526663	-0.000245659	0.000977378	-0.00660143	-0.0125049	-1.79571e-05	0.000601801	0.00566266			2262.23	2145.17	2939.58	3545.5	4963.84	5742.64	6285.83	6398.81	5940.99	5529.16	4900.64	4070.44	3324.54	2394.05	1615.53	892.996	418.741	183.03
0.00269615	-0.00102903	-0.000716015	-0.000792887	-0.000275647	0.000191072	-6.00122e-05	-0.00133112	0.00177739	0.00482291	-0.000486398	-0.000537825	0.000881577	0.00429742	0.00547176	0.00159965	0.00554816	0.00328025	0.00689394	0.0070726	0.00576484	0.00164901	-0.000236392	-0.00240088	0.00177478	-0.00775319	-0.012437	-0.00402664	0.0151163	0.00120047			181.097	288.434	526.018	1004.82	1474.73	1821.35	2016.13	1735.25	1593.83	1581.45	1426.95	1310.29	1159.42	1021.01	909.626	683.004	500.37	372.664
-0.00566824	-0.0108979	0.00101684	0.019711	0.0131527	0.00117197	-0.00897358	-0.0150844	-0.0132472	-0.0186756	-0.00886263	0.00889232	0.0210459	0.016961	-0.00393927	-0.0153891	-0.0146652	0.000377832	0.0133744	0.0195587	0.0124642	-0.000250201	-0.010353	-0.00958604	-0.00416322	-0.00432442	-0.0123027	-0.00481234	0.0175817	-0.00898515			1938.95	1070.28	749.97	818.461	934.53	1107.85	1540.55	2048.89	2172.45	2338.51	2196.9	2173.18	1924.12	1662.89	1486.23	1049.27	730.18	569.004
0.00708863	-0.000468152	-0.00351706	0.0102541	4.5482e-05	-0.0141295	-0.00945141	0.00578942	0.00356635	-0.00341271	-0.00826179	0.00207598	0.00478931	-0.00316655	-0.00218175	-0.0047101	0.00156294	0.00336247	0.000257845	-0.00515393	-0.00365171	-0.00504425	0.0042855	0.00350153	0.000334208	-0.0045027	-0.0106554	-0.0025667	0.00445794	0.00902756			669.495	509.014	578.219	649.201	693.839	832.447	878.709	881.655	950.977	930.9	892.654	803.435	722.376	676.232	721.564	707.163	698.126	640.467
0.00323836	0.00666326	0.00128027	-0.0133388	-0.0163816	-0.00246294	-0.00160064	0.00946289	0.00652443	0.00440348	0.00253356	-0.00814699	-0.0160413	-0.0236963	-0.0206195	-0.00330256	0.0138831	0.0156472	0.0105122	-0.00218527	-0.00413422	0.0039951	0.0104938	0.0104927	0.00235493	-0.00371983	-0.00813451	-0.00752058	-0.017237	0.00368277			2047	2387.17	2652.02	2497.1	2129.68	2114.2	2270.5	2375.11	2391.75	2407.42	2441.75	2401.07	2083.33	1797.24	1468.01	1129.98	773.321	507.344
0.0164901	-0.00515726	0.00285943	0.00827149	0.0126054	0.00870877	-0.00943722	-0.0190528	-0.0108641	0.000367855	0.0113185	0.0128693	-0.00112506	-0.0103524	-0.0214792	-0.0123645	-0.00493132	0.00481687	0.00885666	0.0188974	0.0224505	0.0126991	-0.000150623	-0.000691428	-0.00424543	-0.00458694	0.00206128	0.00732324	0.0138613	-0.0192124			734.363	1326.53	1894.85	2179.53	2349.58	2428.46	2562.64	2803.07	2840.35	2779.05	2644.13	2349.41	2032.12	1705.8	1228.09	734.228	372.693	145.75
0.00535427	0.0109665	0.00859753	0.0134082	0.0108564	0.00617449	0.00116762	-0.00314144	-0.0124564	-0.0276527	-0.022074	-0.00634797	0.0107047	0.0196864	0.0184343	0.00882871	0.00444554	-0.000737115	-0.0116044	-0.00211413	-0.000929132	0.00406555	0.00223172	0.00682383	0.00656242	0.00405807	0.00437725	0.00727576	-0.0027664	0.00380139			1473.05	1082.72	800.833	1020.95	1789.46	2867.8	3733.56	4149.33	4446.91	4598.16	4381.03	4121	3737.32	3163.07	2535.79	1752.22	909.642	498.972
0.0163951	-0.0022986	0.00761675	0.00743841	-0.0117084	-0.0111293	-0.00753581	-0.00949373	-0.0139746	-0.0134399	-0.0108534	-0.00584259	0.000780033	0.00617516	0.00952637	0.0109309	0.00782894	0.00541032	0.00164119	-0.000655221	-0.00402948	-0.011386	-0.0228475	-0.0165492	0.0111909	0.0177516	-0.00402935	0.00226269	-0.0194809	0.0119665			1928.67	2750.31	2303.08	2045.66	1917.7	1842.31	1826.67	1993.19	2107.87	2260.74	2406.48	2498.34	2379.95	1999.39	1643.69	1336.75	1007.97	691.681
0.00157911	0.0191722	0.0212681	0.0204581	0.0177991	-0.00322746	-0.013232	-0.00725623	-0.0012152	-0.00476796	-0.00882908	-0.0064877	-0.000564563	0.00319631	0.00294194	0.000857093	0.00015433	-0.000859485	-0.00364263	-0.00739773	-0.00742328	-0.00325542	-0.00247972	-0.000504928	0.000195848	0.0192353	0.0283628	0.0115721	0.0217043	-0.0113325			242.328	609.861	1103.68	1538.59	1875.56	2642.43	3383.26	4296.91	5071.47	5602.85	5818.69	5596.53	5012.59	4040.99	2931.93	1902.23	1156.41	558.862
0.00776501	-0.0140693	0.00197058	0.00743202	0.00382978	-0.000289331	-0.0145274	-0.0206614	-0.0102223	0.000308203	0.00304914	0.0041525	-0.000894393	-0.000108902	0.00413688	0.00780411	0.00730496	0.00549644	0.00856797	0.00192751	-0.000992288	-0.00384022	-0.0062374	-0.0104512	-0.00977385	-0.00814348	-0.000359411	0.00643038	0.00538194	-0.0104607			2529.18	3072.46	2717.51	2903.96	3546.16	4315.89	4664.25	4586.89	4474.65	4290.87	4187.58	3955.32	3738.06	3329.8	2677.98	2187.99	1447.07	791.502
0.00542108	0.0131642	-0.0160735	-0.0023279	0.0240615	0.018516	0.00768685	-0.00977703	-0.0179484	-0.0206637	-0.0174481	-0.0103089	-0.00208129	0.00463602	0.00592341	0.00893716	0.0108031	0.00995945	0.00824469	0.00487035	-0.00799484	-0.00561466	0.00751507	0.00376079	-0.00412765	-0.00645004	-0.00171531	-0.000395764	0.00831922	0.00155899			1697.59	1612.62	1823.15	1823.75	1714.23	1950.48	2311.42	3217.17	3717.27	4045.82	4199.29	3959.56	3526.45	2808.19	2265.52	1561.47	957.173	566.372
0.0266446	0.00984696	-0.00681363	-0.0194308	0.0060019	0.0276833	0.0168538	-0.00447797	-0.0246057	-0.0446467	-0.0541708	-0.0512691	-0.0282938	-0.00496331	0.0123015	0.0160062	0.0148777	0.0127481	0.0130152	0.0199433	0.0131187	0.00596282	0.0017703	0.00633845	-0.00622301	-0.0308845	-0.0242998	-0.00612661	-0.00292499	0.00326348			193.909	147.874	172.033	181.395	286.484	754.99	1491.51	2439.18	3267.86	4081.93	4850.9	5196.52	5049.79	4398.97	3439.92	2246.67	1245.03	588.309
0.0101491	0.00357864	0.00822462	0.00956713	0.00479085	0.00859405	-0.0021448	-0.0128468	-0.0124207	-0.00677782	-0.00465237	0.000250061	0.00278832	0.00721634	0.00752313	0.0120102	0.000717647	-0.0142581	-0.0249149	-0.0134511	-0.0159769	-0.00434563	0.0135888	0.0192715	0.0177522	-0.00405564	-0.0214687	-0.00819892	0.0126322	0.0266943			1396.92	2033.98	3075.29	4231.9	4451.36	4735.53	4990.31	4774.27	4785.64	4892	4967.12	4920.3	4603.56	4298.65	3806.03	2982.79	2057.55	1275.75
0.00346212	0.00475673	0.00326611	0.00633284	0.00113469	0.00583524	0.00506568	0.000966775	0.00334952	-0.00207732	-0.00780325	-0.00157825	0.0118458	0.0161701	0.00540085	-0.0110822	-0.0268954	-0.0237205	-0.0165389	0.00141286	0.0118507	0.0101946	0.0120325	0.00738368	0.00600848	0.00471253	-0.000956162	0.00112529	0.00315952	0.00509839			358.911	870.726	1767.81	2462.82	2834.91	3049.77	3176.29	2972.81	2878.37	2912.08	3022.68	3189.45	3093.88	2931.85	2530.49	2163.35	1666.57	1155.61
-0.0137003	0.0241055	-0.00565953	-7.40977e-05	0.0147857	0.00695945	-0.00545918	-0.0125693	-0.0083107	-0.00770094	-0.00751756	-0.00709388	-0.0148757	-0.0123026	-0.00529384	0.00439168	0.0118765	0.0170585	0.0184046	0.015321	0.0113621	0.00901353	0.00443723	0.00363591	0.00106423	-0.00190611	-0.00814232	-0.0103474	-0.0117363	-0.00638466			2888.11	2661.16	3073.45	3456.19	3802.64	4045.3	4290.55	4593.49	4646.28	4543.53	4246.98	4085.54	3905.27	3557.47	3243.37	2702.18	2062.58	1494.06
0.0194918	0.00553088	-0.00438681	-0.00771461	-0.0215156	-0.0274422	-0.0160378	0.000505694	0.0020681	0.00235072	0.000207351	-0.00737804	-0.010491	-0.00862633	-0.00554541	-0.0022916	-0.00430014	-0.00575673	0.00215597	0.0180971	0.0262128	0.012424	-0.006022	-0.00556346	-0.0110163	-0.0184915	-0.0150013	-0.005251	-0.010262	0.00735265			1086.22	1281.49	1294.28	1433.68	1647.36	1803.35	1931.22	1790.63	1882.8	1827.02	1844.37	1711.38	1572.15	1373.59	1290.36	1212.09	1085.62	821.025
-0.00620982	-0.00973177	0.00614481	0.0145788	0.0109494	0.00253765	-0.00390314	-0.0111872	-0.0119603	-0.00135172	0.00518169	0.0104176	0.00972876	0.00761705	-0.00546429	-0.0111564	-0.0112775	-0.000710015	0.0108257	0.0146853	0.00910547	0.000126078	-0.00526697	-0.0125838	-0.0156596	0.000623192	0.0146476	0.00523365	-0.0117551	0.00963453			199.522	242.722	374.918	748.137	1274.5	1773.64	2385.99	2634.42	2565.85	2591.7	2308.82	2068.73	1758.97	1641.51	1434.07	1142.14	1072.01	937.225
-0.000686116	-0.0110841	0.0139646	0.0232084	0.001418	-0.0170159	-0.0176604	-0.00462181	0.00648545	0.014629	0.00976559	-0.00568067	-0.00350048	-0.00166678	0.00164959	-0.00124595	-0.0013599	0.00193777	0.00602776	0.0152454	0.00656179	-0.00349727	-0.0116631	-0.00930413	0.00321898	0.00609421	0.00448348	-0.00039937	0.00278313	-0.00373319			176.128	254.797	598.228	846.661	1349.32	1652.92	1999.77	2292.03	2382.57	2298.04	2227.24	2114.74	2135.48	1971.87	1854.43	1701.25	1632.88	1463.89
0.00340521	0.00810493	-0.00895018	-0.00835661	-0.0104919	-0.0257572	-0.0188408	-0.00831814	0.000257459	0.00191983	0.00758195	-0.000923161	0.00296868	0.00792895	0.0126092	0.0113034	0.00502639	-0.00118756	-0.0139583	-0.0250589	-0.00735149	0.0175819	0.0162513	-0.0308539	-0.0401477	-0.00680332	0.0382304	0.00895818	-0.0355946	0.000382731			467.168	667.671	1488.29	2195.74	2638.46	3173.22	3465.94	3696.44	3723.43	3524.1	3293.81	3079.49	2674.32	2530.31	2278.07	2173.93	2153.6	1869.18
0.0516889	0.0166929	-0.0172631	-0.0127073	-0.000756242	-0.00997257	-0.00784492	0.00496371	0.0113015	-0.00113704	-0.000792049	-0.00242313	-0.0102326	-0.0158022	-0.0222952	-0.0166018	-0.00776309	0.00735958	0.0101327	0.00631302	0.00793	0.0139999	0.0118568	0.00431226	0.00461718	-0.00476813	-0.0103544	-0.00371117	0.00258922	0.00450181			1700.95	1705.71	1433.72	1065.12	863.363	721.983	639.211	568.786	495.952	606.674	869.254	1252.96	1611.45	2069.28	2690.7	3108.39	3001.81	2704.82
-0.01394	-0.0169872	-0.0131313	0.0106091	0.0188131	0.0127363	0.00316049	4.43537e-05	-6.34903e-05	-0.00220482	0.000420912	0.00213924	-0.0039017	-0.00704228	-0.0065175	-0.00182975	0.00471375	0.00325402	-0.00417193	-0.0127699	-0.00887476	-0.00396278	0.00659411	0.00518024	-0.0032759	-0.0113722	-0.00503148	0.00640033	0.00188226	-0.000887211			875.361	956.611	1327.6	1752.67	2224.91	2592.84	2906.47	3153.83	3211.41	3089.94	2983.97	2875.87	2868.8	2912.59	2860.6	2687.5	2414.81	2108.35
0.0332878	-0.0215245	-0.0188149	-0.00969328	0.00626263	0.00800046	-0.00215036	-0.000853586	0.00639358	0.0138989	0.0102527	-0.0017816	-0.010537	-0.0148865	-0.00302363	-0.00239587	0.0055457	0.00454009	0.00791662	-0.00480262	-0.00404167	-0.00978703	-0.00598718	-0.00293367	0.00944943	0.0101303	0.0129942	0.00745551	-0.0259262	0.00529643			449.442	594.701	701.818	729.811	828.725	902.156	1028.87	996.328	1136.37	1203.64	1351.15	1503.39	1615.93	1868.35	1887.16	1723.95	1610.48	1396.4
0.0325812	-0.00239382	0.0114486	0.0124394	-0.00769603	-0.0324768	-0.0266132	-0.0143019	-0.00711625	-0.0017161	-0.00847701	-0.00903928	-0.0137873	-0.0143978	-0.0149322	-0.0139645	-0.00868666	-0.00220267	0.000954125	0.00422251	0.00827195	0.0114636	0.00927024	0.012999	-0.00271313	-0.00610669	-0.0286102	-0.0204544	-0.00127704	0.0172772			496.98	711.185	880.264	738.36	944.496	1151.63	1174.07	1514.99	2163.7	3155.58	3699.1	4193	4336.61	4396.23	4254.33	3953.63	3303.86	2545.46
0.019744	-0.00416129	-0.00152231	0.00706692	-0.00320927	-0.00789214	-0.00437829	-0.00292217	-0.00132222	-0.00513445	-0.00174321	-0.000187904	0.0052223	0.0106103	0.0116158	0.0116486	0.0107552	0.00235575	0.00279958	-0.00723882	-0.0050078	-0.00237921	0.00135616	-0.00178773	-0.00677739	-0.00845039	-0.00225032	0.0103258	0.000682061	0.018775			3482.51	2981.06	3154.73	3358.18	3437.49	3289.19	2894.03	2811.21	2845.4	2790.22	2757.8	2769.24	2729.7	2451.15	2329.55	2154.7	1961.54	1731.12
0.0556087	-0.0132807	-0.0142282	-0.0159184	0.0114227	0.0256229	0.0121998	-0.0040428	-0.00463972	-0.000586648	-0.000722362	-0.0099888	-0.0220591	-0.0251372	-0.0174683	-0.00821682	-0.00414492	-0.00269257	-0.00129004	0.00576854	0.0129743	0.0183698	0.0204671	-0.00926904	-0.0259835	-0.0146238	0.0174867	0.0192447	0.00588455	-0.000252152			267.148	292.478	280.617	260.313	298.141	372.101	491.862	740.163	1061.87	1724.1	2274.27	2991.11	3691.46	4107.5	4249.57	4165.61	3948.76	3525.39
-0.00619451	0.00259844	0.00398874	0.00059154	0.00456607	-0.00379449	-0.0140704	-0.00983784	-0.00308827	0.000928143	0.000297613	-0.000351345	-0.00204239	-0.00360594	0.0128853	0.0127539	0.011855	0.000803228	-0.0107407	-0.0168495	-0.00658086	-0.000683792	0.00743429	0.0110652	0.00900556	-0.00432705	-0.00835291	0.00949162	0.00677325	-0.0191718			2141.68	1778.7	1651.54	1605.41	1769.77	1777.9	1723.24	1676.74	1819.62	1872.59	1995.45	1746.83	1710.7	1802.58	1667.47	1717.12	1562.38	1486.79
0.0120112	-0.00190413	-0.0130199	-0.00682259	-0.00849941	-0.0112634	0.000885249	0.0112148	0.0157887	0.00245715	0.000557808	-0.0109534	-0.0306812	-0.0511993	-0.0677945	-0.0545924	-0.0455263	-0.043053	-0.0442159	-0.0337547	-0.0294367	-0.00395956	0.0170571	0.0329545	0.0232563	0.0108069	0.00340295	0.00314416	-0.00847414	-0.0176374			162.247	326.921	437.144	717.945	735.865	1005.47	1349.97	2016.16	2469.56	3819	5181.11	5819.3	6088.58	6071.83	5886.07	5289.15	4426.67	3448.51
-0.00641718	0.00242713	-0.00959328	0.00728533	-0.000837808	-0.00309013	0.000750055	0.0139325	0.0253905	0.0142052	-0.00365142	-0.0254151	-0.0428042	-0.0518834	-0.0510795	-0.0399905	-0.0322385	-0.0183204	-0.00892489	0.00840573	0.0153885	0.0206283	0.0148236	0.0127866	0.00293901	-0.0115217	-0.0175175	-0.0177529	0.0102507	-0.00313965			277.305	321.852	285.991	336.248	481.281	774.9	1383.86	2105.71	3075.04	4863.51	6574.2	7530.23	8131.83	8753.58	9219.92	8192.85	7433.58	6570.44
0.0106208	0.0237203	0.0113559	0.00545672	0.00650954	0.000416009	-0.00469675	-0.0172968	-0.0210262	-0.00424153	0.000639828	-0.0022402	-0.02283	-0.0258964	-0.0231865	-0.00694241	-0.000693617	0.00447402	0.00728665	0.00448084	0.00923773	0.00852981	0.00601636	-0.000380973	-0.00706815	-0.00305916	-0.00453554	-0.00424205	0.00572184	0.0172819			153.306	188.579	323.235	546.419	1150.14	1993.84	2759.57	3416.8	4081.49	4120.78	4321.58	4573.59	4861.73	4934.33	4622.92	4135.81	3632.66	3277
0.00605657	-0.0181227	-0.00507029	0.00844139	0.00828579	-0.00718472	-0.0178956	-0.0117801	0.0132544	0.0211114	0.0233234	0.0106701	0.000570663	0.00182761	0.000645564	-0.0113352	-0.0128548	-0.0153598	-0.0190476	-0.017745	-0.00990967	-0.0029859	0.00739781	0.00911964	0.00101252	-0.00100203	0.00262635	0.0107464	0.00781748	-0.00419416			329.066	731.361	1157.55	1259.62	1481	1716.59	1639.55	1479.51	1362.19	1305.52	1264.01	1352.97	1418.8	1479.31	1511.3	1557.78	1715.16	1860.21
0.0348603	-0.0116105	0.00140222	-0.00632783	-0.00959122	-0.0101682	-0.0117843	-0.0103723	-0.010483	-0.000183374	0.0120952	0.0164295	0.0166395	0.00599505	-0.00510875	-0.00618548	-0.00893701	-0.0018065	0.00940176	0.00942856	0.00607523	0.00051816	-0.00189054	-0.0052837	-0.00652201	0.00702519	0.00387308	-0.0151381	0.00147915	0.00372513			574.199	628.274	725.439	922.655	1078.08	1366.56	1551.71	1710.85	1848.26	2021.03	1999.84	1992.57	2049.32	2119.55	2229.12	2214.21	2323.74	2454.42
0.0288941	-0.0260095	0.019599	0.0179092	-0.0131907	-0.0169001	-0.00463638	0.00200458	-0.000995766	-0.000367983	-0.0113244	-0.00855678	-0.0028353	0.0020586	0.00878316	0.00677728	0.00197043	-0.00123295	-0.0120495	-0.0146511	-0.0151013	-0.000239443	0.00261324	0.0102109	0.00876605	-0.00655759	-0.00622193	-0.00453103	0.00699906	0.0115502			1080.98	1362.35	1640.38	2356.77	2669.7	2971.24	3128.97	3289.25	3351.91	3306.53	3483.7	3578.75	3745.01	4186.13	4463.06	4594.37	4521.76	4100.55
-0.0150881	-0.0139315	0.0086921	0.0125522	0.00831239	0.00791861	0.00477002	0.00800563	0.0113784	0.00170241	-0.00951674	-0.0209404	-0.00783125	-0.00462603	-0.0108845	-0.0167745	-0.0195711	-0.0121453	-0.0081239	-0.00878202	-0.00993013	-0.0118201	-0.00830827	-0.00589925	0.00747913	0.0160714	0.0122139	0.00725643	-0.00922321	0.00415683			318.267	373.351	486.4	582.093	662.231	710.51	715.551	835.961	960.04	1124.54	1170.11	1248.87	1402.85	1567.88	1851.33	1949.04	1943.75	2039.23
0.0338586	-0.0230896	0.00841434	-0.00190748	0.00305454	0.00717835	-0.00560579	-0.00151736	0.00666697	-0.0103085	-0.0320076	-0.0219368	-0.00903659	-0.00289065	-0.00478072	-0.0151134	-0.00913248	-0.00908642	-0.00616454	0.00167647	0.00481236	0.00267061	0.00167731	0.00846619	0.0197117	0.00676222	-0.0295296	-0.0142852	0.000789754	0.0114387			296.243	331.864	415.611	530.264	704.283	924.527	1279.35	1426.9	1982.29	1994.31	2413.34	2762.12	2765.91	3027.62	2865.04	2662.33	2579.93	2333.11
0.0161894	0.00537619	0.00844502	-0.000138092	-0.00614545	0.00486822	0.0165755	0.0138647	0.00885278	-0.00365867	-0.0104798	-0.0144572	-0.0229995	-0.0294209	-0.0323738	-0.0257991	-0.0217783	-0.00858012	0.0080481	0.0161393	0.00331966	-0.00903739	-0.0110545	0.00171901	0.00593198	-0.00175422	-0.00551377	0.00762494	0.0269044	0.00216569			927.161	924.14	996.383	1089.85	1012.32	920.534	1026.52	1439.61	2157.51	2948.35	4366.61	5600.59	5968.84	5761.38	5602.09	5126.44	5058.04	4799.55
0.0251163	0.0224547	-0.0103155	-0.01475	-0.0112117	-0.0109708	-0.0113901	0.00119763	0.0114438	0.0122845	0.0148959	0.00499539	-0.00234399	-0.00760161	-0.0080025	-0.00385966	0.000590375	0.00120908	-0.00847045	-0.0222995	-0.0239121	-0.018929	-0.0128625	-0.00190736	0.0111573	0.0212511	0.00845394	-0.00384372	0.0111777	0.0189444			105.703	116.557	107.923	105.493	106.703	188.328	345.535	487.964	735.704	840.943	1143.11	1383.23	1749.64	1942.36	2297.95	2707.04	2867.64	3136.03
-0.0443291	0.00250173	0.0204472	-0.0199741	-0.0119959	0.0030842	0.0155992	0.0128927	0.00531776	0.00122563	0.00447355	0.0104898	0.0090879	0.00617336	0.000591331	-0.00777374	-0.0176327	-0.021515	-0.0174938	-0.00884965	-0.0044743	-0.0044826	-0.00291993	-0.00251688	0.00501306	-0.000589584	-0.00959002	-0.000472168	-0.0160322	0.0138932			576.481	951.895	1175.25	1314.02	1458.11	1572.11	1661.62	1729.18	1942.42	2195.13	2355.94	2630.32	2993.75	3411.36	3659.79	3743.13	3798.64	3639.29
-0.0403817	-0.0161716	-0.0362901	-0.0109967	0.0127792	0.0104775	0.0109259	0.00277887	-0.0068146	-0.011161	-0.00733893	0.00527885	0.0192852	0.0233747	0.0237167	0.0258831	0.0134868	-0.00897927	-0.0186586	-0.0481584	-0.0903993	-0.118843	-0.0995803	-0.045631	0.0168272	0.0388349	0.034588	0.0446327	0.0228623	-0.00616228			211.72	240.329	272.957	275.748	271.308	261.798	252.925	267.602	344.439	497.911	617.496	779.481	895.856	880.037	942.207	1151	1481.01	1855.36
-0.045282	-0.0204343	0.00653358	0.0170284	0.00501467	-0.0194681	-0.0170162	-0.0121639	-0.0026476	-0.00951844	-0.00214816	0.00827717	0.017795	0.0171036	0.00491672	-0.00377806	-0.00408691	-0.0136073	-0.0248991	-0.0272271	-0.0304884	-0.0162087	-0.00316788	0.0127436	0.011794	0.00780444	-0.0284008	-0.0701319	-0.0552788	0.108288			693.725	859.975	999.213	826.37	771.126	792.701	693.394	807.092	798.078	709.244	819.011	907.884	1157.1	1285.78	1669.97	1931.8	2178.72	2705.26
0.0263147	-0.00538722	0.00270337	0.0195325	0.0244153	0.0185125	0.0152512	0.00124302	-0.00750187	-0.0131957	-0.0132277	-0.00426425	0.00150733	-0.000496476	-0.018775	-0.033474	-0.0372385	-0.0357311	-0.0279514	-0.025462	-0.0190174	-0.0285765	-0.0155582	0.00658495	0.0305277	0.0355385	0.0228475	0.0202063	0.0110986	0.026684			552.983	466.903	461.206	591.621	789.588	1055.61	1499.66	2029.88	2469.6	2788.58	2985.1	3131.19	3158.96	3113.82	3227.35	3308.44	3321.59	3295.31
0.0136233	0.0122352	0.00785872	0.00374484	-0.00220377	-0.000668328	0.00923554	0.00846239	0.0128816	0.00303097	-0.0080155	-0.0146111	-0.0180791	-0.0175631	-0.0102365	0.000301151	0.00364385	0.00221898	-0.00178139	-0.0124628	-0.013759	-0.0120373	-0.00780136	0.00178838	0.00136753	0.00689975	0.0158915	0.0172548	-0.00162798	0.0293672			497.042	674.043	1330.68	1998.46	1969.87	2340.16	2625.01	2875.66	3211.96	3213.71	3459.62	3651.13	3819.46	3725.64	3622.21	3554.54	3769.73	3789.99
-0.0667524	-0.034886	0.0168088	0.0336713	0.0320296	0.0314178	0.0237327	0.0156447	0.016188	0.020756	0.0176751	0.00768023	-0.0123627	-0.0306444	-0.0429097	-0.0660324	-0.065813	-0.0913152	-0.0858043	-0.074277	-0.0511881	-0.0257164	-0.00409189	0.01572	0.0471281	0.046762	0.0288775	0.013831	0.00952597	-0.00933171			121.937	167.748	208.428	239.054	291.415	353.184	416.056	504.15	680.381	776.109	848.673	1131.58	1725.93	2441.73	3078.89	3478.96	3696.87	4167.01
0.00696173	0.00936518	-0.00850025	-0.0149456	-0.000133516	0.00704323	0.0116678	0.0100333	0.00682537	0.00546872	0.00509564	0.00266524	-0.00153939	0.00230381	0.0064845	0.00450316	-0.00697691	-0.0211897	-0.0333828	-0.036797	-0.0360859	-0.035643	-0.0398152	-0.0218299	0.00476837	0.024779	0.0343823	0.0199325	0.0194967	0.0395442			458.415	414.719	464.93	538.963	645.97	826.864	971.27	1068	1220.18	1441.39	1775.81	2173.56	2577.29	2858.29	3074.57	3313.47	3706.37	3835.08
-0.034424	-0.0260544	-0.0284268	0.0166473	0.0198383	0.0163766	0.0132208	0.013781	0.00881053	0.0027257	-0.00802893	-0.00687741	0.00393513	0.00178724	-0.00343265	-0.0124724	-0.0118856	0.0015623	-0.0070313	-0.0174815	-0.0354542	-0.0310028	-0.0131206	-0.00599192	-0.0177319	-0.0119846	-0.000158147	0.0283124	0.0176616	-0.00110385			146.932	174.493	230.711	335.375	430.123	548.44	671.713	713.283	766.008	837.065	1009.54	1121.46	1158.56	1280.95	1344.11	1458.31	1748.14	2021.14
0.0378256	-0.0161988	-0.0195362	-0.0132751	-0.0135315	-0.0134428	-0.00641404	-0.000832821	0.0194877	0.0156482	0.0116794	0.0086682	0.00833209	0.0110161	0.0117027	0.00185708	-0.00597282	-0.00736411	-0.00531852	-0.00750072	-0.00609738	-0.0168429	-0.024429	-0.0233831	-0.0117876	-0.00508475	-0.00539605	0.00196734	0.020145	0.0404118			577.853	728.783	881.125	926.457	1047.06	1139.22	1319.54	1322.05	1487.45	1677.53	1751.27	1741.61	1933.45	2108.26	2246.8	2625.03	2956.05	3113.4
-0.0566858	-0.00448128	0.0310117	0.017955	0.00162595	0.00378526	-0.000785776	-0.00795393	-0.0108696	-0.0144703	-0.000918481	0.00804378	0.00873658	0.00405951	0.00642397	0.00618813	0.00411447	0.00282196	-0.0185295	-0.0210724	-0.0289102	-0.0311197	-0.0296355	-0.0371105	-0.0376253	-0.0566896	-0.0106072	0.0408653	0.0500905	0.0273034			55.9072	63.1759	104.247	119.501	131.702	130.468	145.219	161.052	151.99	145.098	166.699	197.196	236.499	259.646	374.641	464.742	516.38	568.903
[truncated: 12 more columns]

## Sheet: 3d blebbistatin
	Mean curvature deviation per bin (mm^-1)																															Mean fluorescent intensity per bin (a.u.)
bin index	1	2	3	4	5	6	7	8	9	10	11	12	13	14	15	16	17	18	19	20	21	22	23	24	25	26	27	28	29	30		1	2	3	4	5	6	7	8	9	10	11	12	13	14	15	16	17	18
normalized cup position of bin centre	0.0166667	0.05	0.0833333	0.116667	0.15	0.183333	0.216667	0.25	0.283333	0.316667	0.35	0.383333	0.416667	0.45	0.483333	0.516667	0.55	0.583333	0.616667	0.65	0.683333	0.716667	0.75	0.783333	0.816667	0.85	0.883333	0.916667	0.95	0.983333		0.0166667	0.05	0.0833333	0.116667	0.15	0.183333	0.216667	0.25	0.283333	0.316667	0.35	0.383333	0.416667	0.45	0.483333	0.516667	0.55	0.583333
Rows correspond to individual particles
*DMSO data provided in source data - figure 2 - sheet panel f
0.0433634	-0.00761481	-0.0157478	-0.00665073	-0.00137723	-0.00999727	-0.014321	-0.00876195	-0.000213837	0.0012498	0.00519157	0.00699743	-0.00320238	-0.0120287	-0.00148337	0.00323895	0.0120147	0.00599274	-4.20624e-05	-0.00273188	-0.0143483	-0.0109411	-0.0136905	-0.00199885	-0.00160482	-0.00408557	0.00210566	0.00399414	0.00307603	0.002972			1557.09	1698.84	2285.19	1872.62	1613.61	1333.25	878.683	551.886	221.857	53.1415	24.3029	15.5045	10.4038	15.3569	19.9336	19.6718	14.3598	19.3305
-0.0107785	-0.0363204	-0.0102071	0.0357325	0.0196702	0.00255924	-0.00664289	-0.00434556	0.00239735	0.00670868	0.00340815	0.00531356	0.00146537	0.000457058	-0.0113005	-0.0156191	-0.0208922	-0.0152336	-0.00413953	0.00138625	-0.00388335	0.00113472	0.00252733	-0.00122489	-0.00947937	-0.00435046	0.00963659	0.0154791	-0.00123017	-0.012393			6424.64	5970.53	7120.69	5707.04	4998.52	4488.77	4578.63	4460.62	2581.26	711.588	199.003	122.973	114.417	103.802	105.187	76.0567	83.9704	102.084
-0.00616106	-0.0127442	-0.00267619	0.00901778	0.00456956	0.009876	0.00364332	-0.00349023	-0.00922488	-0.00131469	0.00545095	0.00950019	0.0131025	0.0145266	0.0049949	-0.00252497	0.00418223	0.00377109	0.0076752	0.00543824	-0.00515205	-0.00574615	-0.0031019	-0.00780793	-0.00870811	0.000338887	0.00667076	-0.00922452	-0.0104501	0.0292467			623.46	1980.86	3000.34	3599.57	3624.32	3480.82	2651.28	2003.91	1420.62	872.755	517.847	247.6	88.6147	46.8038	52.9222	62.0883	76.1462	89.5084
0.0272719	0.0346908	0.0302115	0.0407305	0.0469393	-0.0072806	-0.0909621	-0.142558	-0.104955	-0.0232459	0.0252853	0.0333471	0.0128065	0.00567441	0.01652	0.0238868	0.0192108	0.00310147	-0.010659	-0.00663003	0.00448103	0.00614045	0.000428407	-0.00834514	-0.0097234	-0.00495561	-0.00220238	-0.0118938	-0.013992	0.00077987			2206.34	2753.53	2530.86	2023.19	2825.02	5230.37	8491.44	11072.7	10226.4	6428.7	2870.09	1240.94	1198.39	1246.87	1250.58	1389.16	1192.96	933.484
-0.00700443	0.00198212	0.0482894	0.0495013	0.023564	-0.0220105	-0.0445004	-0.0354877	-0.00684983	0.0113228	0.0143489	0.0105221	0.00488864	0.00232758	-0.00137417	0.00293122	0.00677632	0.00715682	-0.00319506	-0.00789831	-0.0138992	-0.00381479	0.0153623	0.0115071	0.0119849	0.0059661	0.00960642	0.00671447	0.00202095	0.0107027			2549.33	1975.18	2470.53	3126.24	3670.13	3529.66	2955.89	2203.47	1570.07	1129.1	837.944	517.991	269.889	144.302	97.4141	33.7862	-0.996051	-16.2923
-0.00163552	0.000928843	-0.0171175	-0.0104438	0.00234002	0.00128628	0.00858035	0.00576498	-0.0117337	-0.0142184	-0.0153053	-0.000337955	0.00234252	-0.00430775	-0.000106817	0.00278408	0.00195017	-0.00355815	0.00979329	0.018236	0.0129385	0.0137766	0.00280217	-0.0513483	-0.0541424	-0.00908792	0.00616118	-0.0013032	0.00988989	0.0128894			859.912	934.165	908.895	959.865	981.619	902.541	857.737	845.744	814.038	679.995	479.174	309.086	196.454	113.904	54.9796	28.3566	23.3545	32.4909
0.00949233	0.0220737	0.00906048	-0.0253315	-0.0183215	-0.00621998	-0.0030442	-0.00562616	-0.00706054	0.00380687	0.0114361	0.0121747	0.00820039	0.00663289	0.00617316	0.00574471	0.0118138	0.00954248	0.00326386	-0.0109941	-0.0256509	-0.0235741	-0.00483926	0.00911426	-0.00154881	-0.00377853	7.3752e-05	0.0168205	0.00972219	-0.00138429			1647.12	2518.41	3562.52	3573.18	3515.76	3620.46	3568.51	3473.57	3095.27	2258.54	2023.29	1547.65	1316.74	1012.57	647.155	398.502	197.971	92.4573
0.0367719	0.00574379	-0.00933026	-0.0241056	-0.0189528	-0.00117047	-0.00694982	-0.00257011	-0.0143146	-0.00477248	-0.000620143	0.0089246	0.00686734	0.0121515	0.00528364	0.0035806	0.0013094	-0.00125594	-0.00135209	-0.00373163	-0.00790864	-0.00159056	0.00859191	0.0032545	-0.00291907	-0.0241079	-0.0163862	-0.00323634	0.00777499	0.0187303			751.528	1607.27	2458.15	2686.03	2953.02	2760.63	2604.55	2444.79	2278.44	2072.04	1487.22	1048.76	840.876	439.526	309.268	173.773	145.803	70.466
0.0104491	0.0164146	0.00323654	0.00661656	-0.00439633	-0.0034292	0.0044295	-0.0221326	-0.0485923	-0.0610752	-0.0386336	-0.000373616	0.0274188	0.0255072	0.0119598	0.00498992	0.000695955	-0.00804202	-0.00933002	-0.0129223	-0.00425789	-0.00245735	-0.011484	-0.00934417	-0.000847904	0.00138215	-0.0190783	-0.0115943	0.0068752	0.00969049			890.649	1719.53	2234	1980.07	2306.84	2621.46	2725.85	3079.68	3080.43	3236.25	2716.26	2000.57	1089.55	612.531	362.506	191.681	85.647	50.3624
0.0393778	0.0284273	0.0300891	-0.0370595	-0.0408843	-0.017416	-0.0357252	-0.0170093	0.00716049	0.0101359	-0.000142519	0.000854623	0.00788478	0.0113375	0.0047448	-0.000196187	0.0015483	0.00877645	0.00625443	-0.000843495	-0.0196178	-0.0318566	-0.0205467	0.00244926	0.0140161	0.00548145	-0.0104678	0.000780132	-0.00129403	0.0169391			213.886	217.356	780.719	1596.93	1971.3	2162.71	2270.21	1895.41	1618.9	1393.75	1162.33	988.66	692.035	441.284	222.764	109.611	52.7588	33.9163
0.0123191	-0.0101098	-0.00179895	0.000438304	-0.00886389	-0.00217663	-0.00274994	0.00396273	0.0186051	0.00725878	-0.0147361	-0.0203492	-0.00821057	0.0151171	0.00885332	0.00781582	0.0164046	0.02501	0.0135761	0.00332269	0.00033771	0.0107488	0.00630922	-0.0076759	-0.0216455	-0.00914864	0.00392535	0.00750577	-0.00208282	-0.00448271			4970.78	4645.07	5470.32	4825.05	5178.28	5783.09	6162.02	6373.4	6581.74	6520.58	5571.93	4387.4	3737.53	3281.63	2643.78	2105.61	1445.99	745.42
-0.000729217	-0.0247643	0.00796594	0.00468045	0.008581	0.00963336	0.00577423	-0.000864152	-0.00421489	-0.0113219	-0.00903854	-0.00437979	-0.000708701	0.000543557	0.00277232	0.00682899	0.0137326	0.0186539	0.0140958	-0.00138701	-0.0154399	-0.0158411	-0.00559232	0.00892798	0.0110784	0.00835781	-0.0142886	-0.019254	-0.00389201	0.00951535			6314.44	7992.45	6247.5	5912.34	6660.85	6617.95	6270.59	5442	6022.04	5867.78	6020.1	5827.75	4946.57	3263.21	1988.35	1102.91	478.89	253.397
-0.00200133	0.00355571	0.00419997	-0.0102887	-0.0107336	0.00711337	0.0135681	0.00650085	-0.0100463	-0.022911	-0.0202096	-0.0026301	0.0222584	0.0160359	-0.000977046	0.00157159	-0.0159185	-0.01832	-0.0193829	0.00505716	-0.0279201	-0.043003	-0.026362	-0.00280957	0.00360946	0.0153884	0.0335583	0.0186068	-0.0213378	0.0129571			2729.69	2156.9	2707.06	3148.36	3388.89	3316.73	3255.76	3348.78	3159.04	3504.78	3346.05	2786	2143.81	1537.93	1065.24	702.348	594.249	467.568
-0.00679899	0.0126229	0.00424999	-0.00442296	-0.00381667	0.003212	0.00831779	-0.000262328	-0.00683399	-0.0130097	0.000133597	0.00472323	0.00714786	0.00695566	0.00204164	-0.00531061	-0.00875786	-0.00421612	0.00386652	0.011252	0.0136821	0.015254	0.00842607	0.000289792	-0.0102204	-0.0073634	0.0063494	0.00231007	-0.00562035	-0.00153081			2381.12	2510.91	2573.53	2796.94	2775.26	2602.49	2671.41	2674.38	2870.99	2724.87	2800.08	2855.94	2860.55	2157.53	1369.5	883.135	746.193	459.06
0.0209008	0.00758007	-0.0070037	-0.0148285	-0.0267766	-0.0162773	-0.0113517	-0.00985254	-0.0113427	0.00470171	0.0209722	0.018156	0.00978878	-0.00186468	-0.00892198	-0.0135759	-0.0182754	-0.0265278	-0.0126062	0.00438486	0.00720525	-0.00460123	0.00544161	0.0150311	0.0140246	0.00241794	-0.00983876	-0.0171503	-0.0304824	0.0124866			1915.59	1961.89	2408.05	2835.98	3064.44	3315.76	3365.49	3302.69	3216.5	3117.4	2893.35	2916.97	2563.72	2026.21	1359.03	767.773	395.614	230.014
0.00343651	0.00586791	0.00631427	0.0138909	-0.00151394	-0.0102631	-0.00555173	-0.0034797	0.00214957	0.00609933	-0.00615186	-0.0106911	-0.00591582	-0.00821211	-0.00961285	-0.00935357	-0.00505703	-0.00412311	-0.00312363	-0.000377906	0.000932824	0.00188693	-0.00184277	-0.000675932	-0.00268508	-0.0110306	0.0043192	0.00527991	-0.0115806	0.0257183			3798.11	4235.45	3855.07	3813.84	3811.37	3735.9	3649.33	3680.84	3449.79	3398.18	3446.08	3101.99	2766.95	2587.99	2420.74	1999.45	1888.4	1454.24
0.028925	-0.00867414	-0.00777315	0.0116889	0.0206689	0.00911886	-0.017817	-0.0226832	-0.0123904	-0.0184315	-0.041964	-0.054739	-0.0410412	-0.010886	0.00912814	0.0128779	0.0154148	0.014261	0.0124576	0.00987309	-0.00479236	-0.01023	-0.00437919	0.000320219	-0.00485613	0.00225415	-0.000438545	-0.0131916	-0.0169169	0.00237425			321.313	336.263	580.403	746.051	1139.05	2641.86	4910.65	5811.12	6601.41	6679.93	6520.25	5828.68	5467.94	4661.73	3448.35	2448.24	1156.45	533.085
0.035622	-0.00504486	9.09772e-06	-0.0118889	-0.000977151	-0.0011506	-0.00362291	-0.0146535	-0.0169782	-0.0231927	-0.02355	-0.0166314	-0.00674611	0.00543794	0.0103915	0.01456	0.0159658	0.0159283	0.0121507	0.0126384	0.000223331	-0.00950501	-0.0146021	-0.0166231	-0.00665187	0.000825634	0.0102138	0.00130703	-0.0374386	0.0153308			413.013	1027.16	1947.26	2683.39	3100.44	3316.33	3813.52	3996.26	3913.69	3713.6	3421.89	2970.29	2516.66	1915.74	1289.74	797.019	387.935	180.454
-0.0194849	-0.00724792	0.021735	0.0157705	0.016519	0.0135098	-0.00355664	-0.00928246	-0.0157411	-0.0148102	-0.0166261	-0.0146455	-0.00537986	0.0036595	0.000593628	-0.0101619	-0.0071302	0.00872121	0.0155956	0.00323513	-0.0106348	-0.00776576	0.00546803	0.0091292	-0.00334232	-0.0118432	-0.00392949	0.0109246	0.00249203	-0.0071571			1854.5	2037.46	1894.38	2340.48	2834.44	3063.11	3224.33	3492.4	3664.8	3771.62	3999.59	3916.84	3632.23	3109.88	2311.34	1586.94	991.228	417.199
0.00526604	0.00854505	0.00271387	-0.0035995	-0.00595207	0.000402329	-0.00598343	-0.00531609	0.00224826	0.00353394	-0.00165762	-0.0111097	-0.0152492	-0.0144224	-0.00447016	0.00436007	0.0021826	0.00556088	0.00542382	0.00489398	-0.00520161	-0.00854537	0.00563859	0.00846606	-0.00399706	-0.00289268	1.49038e-05	-0.00462975	-0.00159579	0.00332669			1007.21	1833.92	1356.35	1300.06	1159.84	936.389	924.292	1016.34	1070.17	1125.16	1144.64	1098.91	1008.39	944.718	843.712	795.853	635.379	399.283
0.00415098	0.00643899	-0.000815926	-0.0029036	-0.0167061	-0.0169001	-0.0139161	-0.00235211	0.00636497	0.0115798	0.00719665	-0.000391846	-0.00420696	-0.00723091	-0.00451514	-0.00509777	-0.00641962	-0.00797361	-0.0092621	-0.0021841	0.00643281	0.0127011	-0.00488693	-0.019591	-0.00830326	0.00572577	-0.00147175	-0.0139451	-0.00204608	0.0118544			1869.38	2411.51	2859.86	2862.42	3142.75	3461.62	3382.71	3200.32	2882.02	2916.25	2886.89	2855.1	2623.65	2329.15	1941.26	1485.37	968.182	623.517
-0.0130474	-0.0127813	0.00145066	0.0296521	0.0334001	0.0218977	0.00911473	-0.0133939	-0.02598	-0.0389972	-0.0451761	-0.0381362	-0.0330233	-0.0115126	0.0158607	0.0227916	0.0205522	0.0119886	-0.0021095	0.00528947	0.00365632	0.00296263	-0.0125975	-0.0237226	-0.00511294	-0.00766132	-0.0223531	-0.00109152	0.019956	0.00467771			230.198	445.28	933.334	1783.4	2742.61	3764.75	5054.56	5889.13	6465.09	6494.29	6118.48	5971.48	5811.55	5853.26	5376.99	4009.26	2178.51	851.847
-0.00170998	0.00798284	0.0041001	-0.00431109	-0.00440192	0.00641879	0.0199356	0.0184962	0.00413051	-0.0112758	-0.0133627	-0.00219285	0.00875815	0.0212539	0.0177794	0.0157205	0.00310769	-0.00364076	-0.00757525	-0.000829014	0.000599035	-0.00190893	-0.0032103	-0.00671492	-0.00872078	-0.00768804	-0.0040658	0.00918407	0.0236607	0.0197173			136.538	373.538	702.452	816.011	955.702	1117.53	1227.87	1360.36	1505.49	1537.05	1671.34	1542.3	1369.97	1124.69	888.046	677.667	462.922	309.678
-0.035627	0.00372377	0.0306541	0.0273387	-0.00645351	-0.000626138	0.00858224	0.0108271	0.0108211	0.0030708	-0.00250031	-0.0049997	-0.0135788	-0.0299227	-0.0502894	-0.0506095	-0.0337174	-0.00547265	0.00495462	0.0027348	0.00813771	0.0130598	0.0138314	0.00194946	-0.00438753	0.00407402	0.00919633	-0.000475416	-0.0103973	0.00424203			1621.93	1741.15	1853.72	1968.03	1718.5	1445.68	1433.07	1574.29	1729.15	1869.83	2134.21	2513.22	2824.15	2867.52	2651.34	2294.04	1791.3	995.464
0.017086	0.00263447	-0.0335533	-0.0187946	-0.00633852	0.0211644	0.0115123	-0.0051188	-0.019026	-0.0321535	-0.0327308	-0.0233337	-0.00853775	0.00709475	0.0184614	0.0210569	0.0193052	0.0142676	0.00478666	0.000153189	-0.00217182	0.00139724	0.000509319	0.00447457	-0.0081953	-0.0201998	-0.019406	-0.00956561	-0.0100808	-0.0039254			2058.21	3601.83	3787.28	3170.09	3076.82	2562.03	2671	3152.96	3584.19	4188.27	4225.18	3975.06	3566.24	2954.46	2262.77	1582.09	1102.87	755.748
0.0306087	-0.0127824	-0.00891887	0.0289578	0.0116056	0.00236477	0.0121496	0.0224423	0.0115121	-0.00784516	-0.0182212	-0.0243145	-0.00482229	-0.00732983	-0.00381692	0.00125148	0.00494307	0.0175321	0.00899635	-0.00749668	-0.0274045	-0.0191286	-0.0214083	-0.016805	0.0132655	-0.00247418	-0.00950586	0.0149423	0.0363543	0.0611661			143.595	199	218.691	244.846	291.392	442.919	768.551	1127.4	1597.91	1989.47	2319.95	2481.38	2458.02	2317.8	1965.81	1563.61	1100.96	726.317
0.0214316	0.00155444	-0.0168345	-0.0415508	-0.00218458	0.0210379	0.00406538	-0.0168925	-0.0227878	0.000520491	0.0151837	0.00809081	-0.0086278	-0.0140114	0.00284996	0.00893777	0.00413724	0.00553064	0.00862362	0.0183242	0.0208926	-0.0118165	-0.0687436	-0.0437146	-0.00565652	0.0187726	0.00355369	0.00991254	-0.0109811	0.0260131			4727.78	4347.94	3998.37	3344.45	3314.52	3283.31	3522.16	3402.41	3212.23	2881.9	2488.08	2359.1	1926.48	1553.51	1426.95	1302.58	1166.61	1154.85
-0.0158779	0.0373833	0.015901	-0.0242679	-0.0157903	0.0163104	0.0105495	0.00105367	-0.0146034	-0.0152136	-0.0173108	-0.0135947	-0.00696001	-0.0056078	-0.00129226	0.00337541	0.00456619	0.0097689	0.011636	0.0076366	0.00376752	-0.00237588	-0.0109171	-0.00964129	-0.00432447	-0.00386052	0.00152731	0.000609423	-0.0131548	0.0168374			6526.42	4538.63	5375.85	6015.33	6103.52	5915.6	5766.28	5251.46	5378.79	5451.03	5957.98	5590.68	5186.03	5121.19	4316.74	4056.85	3597.65	3031.73
0.0209114	-0.0599861	-0.00353924	0.0448617	0.0354117	0.0139246	-0.00712935	-0.00838429	0.000953288	0.0121837	0.0177269	0.0219501	0.0119198	0.00254123	-0.0042056	-0.00649573	-0.00641974	-0.00679088	-0.00909247	-0.00274014	0.00781235	0.0166698	0.0105787	-0.018415	-0.0391961	-0.0107988	0.0403689	0.0445144	0.00456152	-0.00481443			191.843	210.653	390.149	668.516	809.561	1336.14	2146.37	3013.23	3691.96	4152.29	4212.24	4042.74	3629.84	3023.49	2310.67	1752.55	1349.28	1121.55
0.0360449	0.0243983	0.00034084	-0.0677603	-0.0311949	-0.00958252	-0.00615389	0.00342422	-0.00324678	-0.0105783	-0.0101516	-0.0114205	-0.0170768	-0.0286517	-0.033955	-0.0254148	-0.0206229	-0.0126485	-0.00986067	0.00232186	0.00344975	0.00365631	0.00357819	0.00526395	-0.0122992	-0.0156394	-0.00223953	-0.00848421	-0.0147438	-0.0116653			276.53	1401.63	4094.9	4836.32	3236.42	3265.98	3006.33	2676.43	3541.5	3637.34	3678.43	3555.27	3472.86	3430.04	3525.2	3385.96	3386.63	2877.04
0.0140321	0.00547407	0.0026326	0.0105859	0.00229997	0.012709	0.0147101	0.00187388	-0.00389906	-0.00588927	0.00427745	-0.0119655	-0.0275087	-0.0445175	-0.0435421	-0.022612	0.00363672	0.0209593	0.0335072	0.039911	0.0313039	0.026331	0.015852	0.00627135	-0.00621775	-0.0126248	-0.0297241	-0.0138627	0.0135465	0.00694786			402.397	637.282	1022.03	743.511	785.566	669.795	718.341	717.831	843.586	1139.04	1219.55	1440.32	1682.69	1891.35	1851.85	1654.63	1335.4	949.701
0.0337803	-0.037944	-0.0436502	-0.0116664	0.0309799	0.0308756	0.0346853	0.0453546	0.0581887	0.0568971	0.0172103	-0.0427459	-0.134391	-0.178847	-0.189967	-0.15786	-0.0979281	-0.0262302	0.0254023	0.047513	0.0494956	0.0254688	-0.00534499	-0.00333131	0.000769522	0.00354383	-0.016393	-0.00362141	-0.000991477	0.030475			500.456	1229.05	912.981	713.482	749.328	928.73	1267.19	1484.63	2016.39	2742.1	3841.67	4498.11	5233.55	5245.35	5046.43	4915.48	4151.48	2978.84
0.0169107	-0.014495	0.00812944	0.000241623	-0.00533008	-0.00288922	0.00167739	0.0138763	0.018887	0.0161768	0.00551383	0.00270359	-0.000721033	-0.00695933	-0.0155798	-0.0275905	-0.0222291	-0.00947606	0.013326	0.0295584	0.0239915	0.00365674	-0.0129792	-0.00829237	0.00389936	0.00939427	0.0140212	0.0041496	-0.00559971	0.00178151			1569.77	1545.75	1473.98	1635.99	1697.31	1733.9	1701.86	1759.38	1835.28	2055.41	2228.02	2308.71	2043.71	1842.24	1539.35	1578.91	1778.38	1725.7
0.0636748	0.0032895	-0.0290737	-0.0361338	-0.014121	-0.0196565	0.0032721	0.0432548	0.0332581	0.0226971	-0.0177007	-0.0652762	-0.0970657	-0.0571839	-0.0780131	-0.12482	-0.115747	-0.089741	-0.0417795	-0.00153471	0.0140984	0.0275201	0.027058	0.0131223	-0.000460662	-0.00170314	-0.0155568	-0.0192268	-0.00312374	-0.00712007			89.8589	142.522	248.962	442.547	916.682	1499.49	1887.54	2191.8	2846.52	3846.91	5621	7013.9	7579.12	7624.94	7491.34	7832.93	7188.04	6302.8
0.00292605	0.00276865	-0.000387636	0.0129806	0.0103577	-0.00775421	-0.0113	-0.00760473	-0.00243984	-0.00494385	-0.00268262	-0.002441	-0.00487646	-0.00631394	-0.0103424	-0.0109155	-0.0096437	-0.00646158	-0.00304472	-0.00281412	-0.00403315	0.000158112	0.0127243	0.0107929	0.00217686	-0.0110208	-0.0129878	-0.0017517	0.0134938	-0.00132776			486.334	513.12	543.775	621.627	773.456	924.541	1134.23	1230.36	1334.93	1371.87	1397.86	1450.71	1455.52	1369.86	1320.91	1189.12	1101.01	987.619
0.0165795	-0.00850903	-0.00383664	0.0144282	0.00431745	-0.0307052	-0.0314454	0.0074087	0.0129892	0.0338482	0.0526145	0.0520553	0.0195058	-0.0284443	-0.109168	-0.203802	-0.187439	-0.141773	-0.0711945	-0.0118509	0.0235057	0.0203763	0.0240657	0.0232102	0.0257132	0.00745721	0.00640213	0.0184242	0.0211749	-0.0187566			716.897	1130.52	2210.95	2493.29	2821.18	4259.89	5969.67	5817.57	6265.48	5909.99	5548.44	5076.97	5253.91	5467.53	5405.24	5186.47	4606.16	4175.63
0.166602	-0.0603476	-0.0267219	-0.0372542	0.0135989	-0.0064914	-0.000152381	0.00831968	0.00456802	-0.00379059	-0.00285847	-0.0062894	-0.0113035	-0.0187505	-0.0180075	-0.0106618	-0.00334538	-0.00121566	0.000519467	0.00475757	0.0115125	0.0138048	0.00584366	0.00948061	7.10789e-05	-0.0207034	-0.02327	-0.0063819	-0.0075099	-0.00625689			978.569	808.56	1049.35	1246.16	1420.42	1634.35	1966.15	2208	2521.35	2582.86	2644.67	2643.69	2734.35	2769.5	2715.1	2680.79	2544.78	2314
0.0521671	0.0100481	0.0206981	0.00421982	-0.000130433	-0.000164985	-0.0134987	-0.0167014	-0.0173191	-0.0209435	-0.0209938	-0.0198303	-0.0204411	-0.0275989	-0.0166238	-0.0106753	0.00535327	0.0038411	0.000482365	-0.00238588	0.00229291	-0.00311933	-0.0115316	-0.01484	0.00672202	0.025729	-0.0096845	-0.0237295	0.00770338	0.028263			727.883	875.513	1074.59	1274.42	1896.44	2870.97	3344.18	3413.68	3327.08	3852.05	5037.94	5114.69	5246	4545.65	4129.41	3658.27	3168.83	2733.99
0.0184283	-0.00973422	0.00851903	0.00274311	-0.00783213	-0.0198901	-0.0181117	-0.0280685	-0.0242802	-0.0116205	-0.00175266	0.0046955	-0.000391916	-0.00171115	0.00357017	0.0166414	0.0327165	0.029637	0.0035341	-0.0357496	-0.0789024	-0.097263	-0.0689205	-0.0158034	0.0210477	0.0353049	0.0296189	-0.00198858	0.0028609	0.0224176			204.028	391.292	540.285	622.408	481.31	452.355	585.745	713.566	835.199	931.637	1108.85	1315.75	1223.18	1144.06	1150.85	1404.38	1559.19	1924.78
0.0601086	0.00746752	-0.019973	-0.00460568	0.0100595	0.0159903	0.0078877	-0.0140831	-0.03344	-0.0352751	-0.0347039	-0.028606	-0.0221478	0.0175816	0.0413366	0.0100949	-0.0137631	-0.0185636	-0.012701	-0.0151718	-0.0189211	-0.00771367	0.0121332	0.0322552	0.0237716	0.0175942	-0.0179306	-0.0224162	-0.00506301	0.00916434			243.437	271.598	295.977	393.093	477.419	812.049	1222.69	1557.69	1852.28	2012.51	2038.19	1889.69	1688.41	1346.37	1232.26	1316.92	1234.59	1387.79
0.00396491	0.0409223	0.020439	-0.00210635	-0.00335413	-0.00395504	-0.00254106	0.00718295	0.00891483	0.00426849	0.00783232	-0.00135643	-0.0101878	-0.0202681	-0.0262445	-0.0251839	-0.0215634	-0.0150474	-0.00584824	0.00837463	0.0132562	0.0082197	0.00393513	0.00653089	0.0136788	0.0166473	0.0188321	0.0106208	-0.000718854	0.00400847			1533.59	2285.1	3000.04	3510.18	3872.08	4085.31	4359.45	4260.72	4357.86	4508.56	4657.89	4775.8	4610.22	4640.56	4346.78	4178.35	3884.56	3319.44
0.00279564	0.0286916	0.0431167	0.0171669	0.00710807	-0.000666476	-0.0025944	-0.0059806	-0.00292166	0.000575938	-0.00233833	-0.00543148	-0.0041538	0.00224181	-0.000623978	-0.00732823	-0.0166253	-0.0271947	-0.0269896	-0.0166412	0.00232469	0.0128125	0.0188881	0.011361	0.00749408	0.0175163	0.0261471	0.0155336	0.00372281	0.021819			2872.55	2277.65	2422.93	2528.21	2607.71	2635.97	2614.33	2758.32	2954.71	2974.96	2871.57	2752.02	2667.28	2586.58	2558.31	2579.25	2607.64	2550.84
-0.0110445	-4.08133e-05	0.00919494	0.00362916	0.00588309	0.00295894	-0.00310178	-0.0124931	-0.0107891	-0.00565011	0.0012716	0.00342591	-3.81007e-05	-0.00428689	-0.00855699	-0.00721345	-0.0139951	-0.0193386	-0.0205748	-0.0170094	-0.00632323	0.00470394	0.00948743	0.00836408	0.000568538	-0.00824163	-0.0123605	-0.00832383	-0.00607325	0.034249			11618.9	7604.94	6208.07	4761.29	4419.64	4602.13	4777.53	5275.49	5309.73	5370.15	5499.67	5653.75	5351.43	5323.82	5601.46	5929.07	6121.45	5819.45
0.0239616	0.0104297	-0.00875173	0.00221306	0.0101275	0.000929184	-0.00660225	-0.00442856	-0.00436015	-0.00384782	-0.0031286	-0.00506734	-0.00451209	-0.00803123	-0.00260273	-0.0031835	-0.0138535	-0.0298386	-0.0254721	-0.0159997	-0.00514796	0.00331238	0.0090914	0.00871711	0.00730676	0.00476775	0.0060838	0.0107063	0.00661253	-0.000402703			823.033	1450.55	1835.72	1968.99	1974.9	2185.7	2260.51	2592.4	2487.4	2501.91	2488.64	2600.97	2719.13	3004.17	3006.21	2684.14	2678.83	2514.71
-0.0125402	0.0264165	0.0263263	0.0120268	0.00901695	0.0107597	0.00891456	0.000853538	-0.0277346	-0.0303772	-0.0337071	-0.0161465	-0.009634	-0.00939976	-0.0173237	-0.015411	-0.00966248	-0.00055113	0.0112053	0.0134251	0.0108451	0.00460207	0.00109119	0.0149377	0.0250512	0.0112468	0.00533518	0.00324314	-0.0132307	-0.0253524			114.425	168.477	318.549	696.774	1150.74	1440.85	1974.06	2258.44	2647.28	3042.63	3245.99	3147.31	3343.26	3291.59	3309.62	3221.1	2975.05	2595.66
0.0151974	-0.00463755	0.00628368	0.0103474	0.0120016	0.0151737	0.00649813	-0.000185497	0.00341002	0.00420918	0.00512433	0.00496899	0.00106524	-0.00345921	-0.0108432	-0.0211401	-0.0287519	-0.0339525	-0.0258563	-0.0136385	-0.00408137	0.00862975	0.00799459	0.00947117	0.0115626	0.0149077	0.00987527	0.00209014	0.00438661	0.0304487			1965.75	1355.14	1686.48	2377.56	2622.09	2559.06	2701.25	2739.42	2841.76	2874.32	3087.59	3594.74	4302.33	5482.94	6781.91	7997.97	8818.54	9107.41
0.0262969	0.00731671	0.00770824	-0.00454941	0.00115788	-0.00997497	-0.0278754	-0.0403737	-0.0247969	0.00269245	0.0229881	0.0283385	0.0187542	0.00416394	-0.00958012	-0.0225793	-0.041203	-0.0496909	-0.0423842	-0.0353162	-0.0156291	0.00374913	0.00897016	0.0214826	0.0161533	0.00168665	-0.00647397	-0.0048611	0.00561352	0.00529615			184.53	323.792	365.026	289.778	264.623	402.753	731.32	1108.1	1339.8	1470.96	1561.29	1543.46	1564.5	1791.87	2293.78	3091.72	3682.65	4117.84
0.0296328	0.000815679	-0.00467805	0.00879251	0.00715907	-0.0103652	-0.0130333	-0.000652691	-0.00135819	-0.0134529	-0.0153576	-0.0135181	-0.0106252	-0.00536574	-0.001708	-0.0033611	-0.00703794	-0.0177093	-0.0124684	-0.00576233	0.0052413	0.0105827	0.00960391	0.00437973	0.00501743	-0.00355533	-0.016833	-0.0282553	0.0145406	0.0262452			7632.14	5591.28	5859.57	5595.26	6225.45	6261.17	5659.93	5584.49	5791.2	6508.97	6753.8	7139.95	7645.61	7281.67	7753.52	7898.45	7205.3	7050.66
0.0571902	0.00643558	-0.00396676	-0.0158078	-0.0306178	-0.0314261	-0.020378	0.00285813	0.0190701	0.0295091	0.025262	0.0135844	-0.0114397	-0.0222354	-0.0328149	-0.0572763	-0.118864	-0.170493	-0.178953	-0.125129	-0.0511032	0.00916395	0.0428214	0.0447771	0.0407233	0.0341095	0.0318549	0.0190565	-0.000516739	0.0174199			514.274	509.107	1002.11	1255.2	1177.37	1251.69	1320.86	1336.36	1389.9	1466.93	1522.9	2327.13	4353.52	6449.06	8416.95	9347.73	11312.5	11896.4
-0.00567839	0.00133876	-0.0015091	-0.0151868	-0.0140278	0.00407932	0.00972494	0.0087411	0.0145294	0.00788433	-0.000243799	-0.00709934	-0.00204577	0.0130725	0.0260044	0.0188967	-0.0187521	-0.0700987	-0.0959698	-0.0891584	-0.0442417	-0.00286518	0.0165848	0.0246753	0.0305372	0.0218828	0.00286757	0.00678206	0.00716552	0.00588794			139.341	153.191	151.025	168.065	256.36	347.665	416.488	496.305	559.273	612.069	677.041	846.347	910.594	1049.99	1369.13	1905.22	2899.46	3849.08
0.0365825	0.0100095	0.0225685	0.00774617	-0.00316413	-0.0010033	0.000124639	-0.00562259	-0.0179124	-0.0168205	0.00189366	0.00304975	-0.00306115	-0.0171142	-0.0248376	-0.0142993	-0.0124619	-0.00988799	-0.0105029	-0.0103344	-0.00972987	-0.0181934	-0.0107916	0.00378748	0.0165605	0.0123815	-0.00642825	0.022499	-0.00848509	0.0774697			86.8571	267.849	332.675	396.759	497.924	536.675	631.369	694.037	730.974	766.484	861.964	1076.39	1127.54	1150.96	1160.6	1102.72	1088.87	1034.32
0.0255867	0.00450172	-0.0121063	-0.0105571	-0.0128753	-0.0194179	-0.0157436	-0.0061211	-0.010364	-0.00947397	-0.00407148	0.0103191	0.00687843	-0.00901447	-0.00931096	0.00434655	0.0341046	0.0463714	0.0246281	-0.0273219	-0.0891203	-0.100178	-0.0719599	-0.0283839	0.0151156	0.0146794	0.0163805	0.0362736	0.017158	0.0153205			830.355	741.646	850.917	916.591	1098.02	1155.51	1120.25	1560.23	2153.33	1627.03	1341.02	1270.13	1487.68	1891.91	2256.54	2645.04	2703.86	3002.84
-0.0174221	0.00300815	-0.0226636	-0.019692	-0.0108517	0.0123778	0.00527928	0.00323538	0.00390903	0.00233623	0.00673101	0.0156816	0.0248934	0.00514742	-0.0142426	-0.0354496	-0.0591498	-0.0481589	-0.0428334	-0.0365806	-0.0221297	-0.00881047	0.0108539	0.00752346	0.00365862	0.00476183	-0.01531	0.00304275	0.0157283	0.000613889			1813.65	1099.51	1012.74	848.491	629.378	601.3	567.172	498.895	416.966	432.2	504.143	590.527	765.284	1050.94	1403.85	1708.12	1966.94	2010.22
0.0099958	0.0142549	0.0156068	0.00582541	0.000978686	-0.0077455	-0.00285654	-0.00679419	-0.00585053	-0.00535203	-0.00230134	0.00243849	0.0137114	0.0149875	0.00758528	-0.00138978	-0.0134644	-0.0253154	-0.0397367	-0.0398251	-0.0347274	-0.0242151	-0.00452352	0.00571359	0.00959993	0.0272462	0.0393065	0.00498929	0.00632899	0.0173685			1164.24	862.559	900.263	859.808	742.607	724.266	679.247	704.362	753.304	881.391	896.386	1047.09	1079.82	1253.43	1470.43	1651.84	1876.46	2188.24
-0.00192642	0.0304836	0.00523107	0.00497609	0.0203967	-0.0168259	-0.0344404	-0.0127018	0.0165823	0.0427476	0.0414389	0.0386213	0.021142	0.00464516	-0.0128295	-0.028349	-0.0534109	-0.0669758	-0.071409	-0.0530416	-0.0282889	-0.017046	-0.0146622	-0.0121685	0.00137945	0.0201766	0.0432232	0.047996	0.0381532	0.0472572			2802.92	2258.2	2060.19	2409.08	2128.26	2272.23	2435.91	2338.04	2346.85	2288.76	2348.76	2329.52	2389.46	2596.22	2950.17	3344.13	3835.88	4429.77
0.0371029	0.0103221	0.0273187	0.0124812	0.0015855	0.00786126	-0.010039	-0.00736134	-0.00350174	-0.00494231	-0.0137594	-0.0153253	-0.015301	-0.00702332	-0.00550435	-0.00278879	-0.00341034	-0.00396611	-0.00640018	-0.0100238	-0.00753242	-0.00864562	-0.0162056	0.0016817	0.0150635	0.0160102	0.00529047	0.0198707	-0.00610173	0.0412404			1310.66	1301.05	1363.06	1607.57	1904.53	2112.95	2176.97	2060.47	1929.8	1853.49	1752.94	1600.41	1494.41	1427.27	1351.86	1292.07	1259.06	1146.95
0.0133081	-0.0241534	-0.000250591	0.00742319	-0.00340464	-2.24944e-05	-0.000948016	-0.00112392	0.00615849	0.0182757	0.0108477	0.0094337	0.00501079	-0.0154936	-0.0461365	-0.0747756	-0.0801117	-0.0546923	-0.00723395	0.0142693	0.0229458	0.0286907	0.0270839	0.0228558	0.00975377	-0.0153425	-0.0195025	0.00393425	-0.000894125	-0.00619159			35.5274	73.7965	101.326	70.4904	96.9953	134.892	136.687	155.705	246.562	351.653	598.831	703.909	906.533	1115.78	1459.68	1637.92	1722.24	1700.48
0.055646	0.00507553	0.0135867	0.00923094	0.00765676	-0.00190029	-0.00669639	-0.00496771	-0.00183441	0.00859631	0.0103225	0.00942415	0.00471534	-0.00213724	-0.00615547	-0.00435542	-0.0109547	-0.0162238	-0.0215898	-0.0274481	-0.045994	-0.0462989	-0.024971	-0.0156446	0.00413262	0.0310064	0.0601023	0.0575416	0.00556646	0.0731244			882.742	988.737	1003.83	1177.62	1338.01	1593.7	1796.84	1862.01	2021.78	2046.27	2193.41	2210.6	2246.29	2440	2682.34	2963.98	3098.54	3358.84
0.0059974	0.00989996	-0.0204296	-0.0247391	-0.0134083	-0.00023325	0.00165841	0.00951039	0.00938002	0.0135919	0.000226722	-0.00858424	-0.0101509	-0.0177155	-0.0105706	-0.0147315	-0.00947459	-0.00926292	-0.0111915	-0.0101824	-0.00416475	0.0034283	0.0135847	0.00860567	-0.00111608	-0.016451	-0.0125159	0.00531531	-0.00418443	0.00219807			1905.29	1454.4	1230.41	1246.65	1280.63	1330.93	1616.3	1917.39	1545.47	1553.36	1621.29	1544.36	1604.94	1844.96	1947.22	1894.18	1637.84	1575.44
-0.00971317	-0.00430069	-0.0213269	-0.0139418	-0.00744427	0.00693601	0.0024185	-0.00531276	-0.005795	-0.00351263	0.00420847	0.0101848	0.00529616	0.00218015	-0.00953529	0.00192031	0.0307219	0.042927	0.0385791	0.00469635	-0.0563692	-0.100975	-0.113805	-0.0994353	-0.0484148	0.0103534	0.0474311	0.0692535	0.0492438	0.0389456			172.488	209.705	167.197	180.684	211.438	256.835	230.165	238.23	279.324	317.934	372.599	370.309	400.997	355.633	394.702	412.151	492.567	717.67
-0.0416542	0.0205556	0.0475798	0.0196624	-0.00255315	-0.00686723	-0.00118641	0.00793385	0.00608467	0.00421403	0.00563004	-0.00390673	-0.0127628	-0.0162477	-0.00756313	0.00319233	0.00113452	-0.0216233	-0.0349495	-0.0404929	-0.0129005	0.017446	0.0244523	-0.000403817	-0.0263282	-0.00249451	0.0237651	0.0320188	0.0221415	-0.0165308			221.569	232.874	367.952	482.119	541.978	624.696	695.867	796.085	995.896	1131.77	1145.64	1330.4	1576.04	1675.82	1849.79	1753.99	1751.53	1656.25
0.0214097	0.00708822	-0.0079677	-0.00897509	-0.00552235	0.00150948	0.00794099	0.00686545	-0.00463366	-0.0153046	-0.0149298	-0.0145769	0.00122073	0.0108279	0.018097	0.00460734	-0.00120698	0.00217408	0.00632919	0.0132874	0.0102046	0.00651994	0.000774866	-0.00410395	-0.00728443	-0.00255921	0.000679029	0.00857501	-0.0156164	0.0106825			1210.15	1574.08	1832.55	1498.6	1298	1180.28	1086.89	1128.63	1056.87	968.769	840.284	695.545	631.811	684.449	765.839	798.366	816.51	831.863
-0.00372274	-0.0120032	-0.00334682	0.00398812	-0.00554532	-0.00121426	0.00748597	-0.000409697	-0.00580912	-0.0078194	0.00588414	0.00748717	-0.00345894	-0.0127862	-0.0166213	-0.00935136	-0.00485872	0.00521984	0.00494577	0.00477107	-0.00650533	-0.00579044	-0.0256358	-0.0322829	-0.0122568	0.00378736	0.0227084	0.0128091	-0.0117616	0.000908334			1419.7	3375.62	5064.76	5358.84	5878.76	5312.54	4692.95	4202.75	4209.87	3531.44	3118.1	3099.62	3165.24	3631.59	3517.18	3456.5	3574.32	3550.18
0.0308692	-0.0059771	0.0231415	-0.00473239	-0.0102957	-0.00461014	-0.0108111	-0.0175848	-0.0199893	-0.0124194	-0.00903873	0.00477128	0.0112542	0.012771	0.0142069	0.0106246	0.00475418	-0.0163971	-0.0230035	-0.0297558	-0.0330986	-0.0322595	-0.0360696	-0.0627375	-0.046623	-0.0102111	0.0147077	0.0444996	0.0572866	0.036019			965.283	1589.35	1958.01	2252.71	2586.36	2778.66	2763.83	2544.91	2413.7	2094.64	1896.42	1531.06	1401.85	1397.75	1324.27	1335.94	1413.76	1422.27
0.0296256	-0.00475561	0.013022	-0.0200636	-0.013248	0.0157314	0.0142155	-0.0120361	-0.0141314	-0.0272389	-0.0349034	-0.0313266	-0.0218892	-0.002606	0.0094776	0.00335527	0.000908599	0.00410377	0.00579076	0.0139041	-0.00697029	-0.0149734	-0.023719	-0.0203955	0.0137553	0.00192914	-0.000106987	0.0111091	-0.0054652	-0.00605649			2044.2	4605.51	3768.2	4358.27	3660.65	2837.81	2429.71	2355.74	2470.18	2463.02	2607.49	2397.38	2529.1	2395.87	2134.72	2262.39	2274.31	2084.45
0.0195516	0.0212501	0.00894281	0.0105384	0.00351581	-0.00493363	-0.00383937	0.00177773	0.0145166	0.0198753	0.0126225	-0.00167735	-0.0174112	-0.0305611	-0.0440825	-0.0402648	-0.0324566	-0.0173127	-0.00336216	0.00189603	-0.000947838	-0.00271762	0.00451022	0.00242634	-0.000668925	-0.00715591	0.00471421	0.0330454	0.02408	0.0233313			198.255	337.866	291.1	449.523	724.111	1094.01	1260.78	1760.57	2116.91	2549.82	3285.42	3795.16	4281.38	4406.62	4763.28	4794.93	4691.25	4314.91
-0.020553	-0.0105026	-0.00782216	-0.0119587	-0.00855332	0.0124042	0.0164961	0.020265	0.00660797	0.000847773	0.000287807	-0.00870023	-0.0100343	-0.00825408	-0.00391617	0.00151273	0.014969	0.0226382	0.0182824	0.000916704	0.000516045	-0.00178821	0.0159544	0.00149448	-0.035831	-0.051883	-0.0419026	-0.0146142	0.0153674	0.042402			45.9075	54.0998	72.3258	77.6422	79.8441	79.9869	116.038	237.069	373.255	407.64	517.605	666.992	789.103	955.024	977.382	1098.48	1244.71	1508.9
0.0357983	0.0453646	0.03405	-0.0112869	-0.0289262	-0.0230041	-0.00181181	0.00526357	-0.00086772	-0.00905332	-0.0084372	-0.00313807	0.00155325	-0.00057828	-0.00152958	0.00349782	0.0106488	0.00940329	-0.000145442	-0.0227955	-0.0359187	-0.0478754	-0.0474611	-0.00947553	0.0122118	-0.0192379	-0.0944763	0.0521237	0.111461	0.355071			2059.68	1849.64	1748.61	1808.01	2287.04	2722.4	3082.5	3602.55	3940.25	4415.52	4798.51	5256.65	5743.34	6259.41	6419.15	6628.77	6251.74	5929.25
0.00464954	0.00547831	-0.00986915	0.000167885	0.0129137	0.00794702	-0.00149933	-0.00300575	-0.00434747	-0.00163693	-0.0025317	0.00207029	0.00654339	0.00787216	0.010459	0.00211292	0.000602984	-0.00358936	-0.00415579	-0.00198364	0.00677458	0.0099315	0.00623489	-0.000479959	-0.000156296	0.00476406	-0.00112666	0.0012486	-0.00560053	0.00737648			3747.73	3289.89	3486.86	3561.97	3663.52	3542.73	3564.01	3247.42	3064.55	2881.96	3028.23	3301.31	2955.23	2860.92	2777.87	2842.97	2996.96	2760.13
-0.0726754	-0.00979213	0.00595534	0.000573828	-0.00227096	0.00765592	0.00422132	0.000738017	0.00786306	0.00609501	0.00453992	0.0101265	0.0141766	0.0114716	0.008678	0.00323277	0.00265468	-0.00672361	-0.044926	-0.100057	-0.135295	-0.106353	-0.0538162	-0.0242059	-0.00215923	0.0172886	0.0303658	0.0416656	0.0287192	0.0148929			132.375	175.632	187.571	199.567	293.289	451.458	552.057	612.649	563.686	611.841	672.323	706.43	776.417	1055.58	1450.63	1689.58	1926.63	2198.76
-0.0175786	-0.00433594	0.0120244	-0.00113397	-0.00554774	-0.00579849	1.36085e-05	0.000874539	-0.000975353	-0.0162598	-0.025512	-0.0116703	-0.00926474	0.00834974	-0.00179183	-0.00952148	-0.00639097	-0.00937118	-0.0172319	-0.0109278	-0.00471618	-0.0205676	-0.0364874	-0.0523962	-0.0371336	-0.00887559	0.0146772	0.018598	0.0175791	0.0435376			1842.17	1338.96	1178.97	1050.73	918.209	845.12	844.926	896.661	889.951	982.227	973.839	855.05	846.111	790.417	833.959	852.818	924.645	1017
0.015193	0.00429446	-0.00289875	-0.0159541	-0.0362615	-0.027163	0.00315256	-0.000142301	-0.0123097	-0.0139036	0.00503573	0.0113432	0.000967571	-0.0239575	-0.0274894	-0.00874166	0.00279104	-0.010069	-0.018467	-0.0343393	-0.0346724	-0.0128549	-0.00984547	-0.0229616	-0.0105748	0.0155227	0.0190553	-0.021405	-0.0120193	0.0171229			573.78	678.942	440.871	377.326	379.545	361.682	368.853	387.01	401.913	483.662	580.615	693.788	986.895	1083.41	1171.83	1135.49	1124.34	1188.22
0.00561856	0.00633902	-0.0176974	-0.016202	0.000424315	0.00407131	0.0137266	0.00517392	-0.0083002	-0.0227875	-0.00963484	0.00999336	0.0313835	0.0348764	0.0385897	0.0283557	0.0145959	-8.92626e-05	-0.0320448	-0.0600083	-0.0866549	-0.0823561	-0.0732079	-0.0460088	-0.00247287	0.0145304	0.0280511	0.025639	0.0721774	0.110509			116.746	109.864	110.744	163.187	133.031	116.51	121.813	169.164	240.32	294.245	335.237	374.414	451.489	541.996	642.828	832.175	1169.22	1543.23
[truncated: 12 more columns]

## Sheet: 3d SMIFH2
	Mean curvature deviation per bin (mm^-1)																															Mean fluorescent intensity per bin (a.u.)
bin index	1	2	3	4	5	6	7	8	9	10	11	12	13	14	15	16	17	18	19	20	21	22	23	24	25	26	27	28	29	30		1	2	3	4	5	6	7	8	9	10	11	12	13	14	15	16	17	18
normalized cup position of bin centre	0.0166667	0.05	0.0833333	0.116667	0.15	0.183333	0.216667	0.25	0.283333	0.316667	0.35	0.383333	0.416667	0.45	0.483333	0.516667	0.55	0.583333	0.616667	0.65	0.683333	0.716667	0.75	0.783333	0.816667	0.85	0.883333	0.916667	0.95	0.983333		0.0166667	0.05	0.0833333	0.116667	0.15	0.183333	0.216667	0.25	0.283333	0.316667	0.35	0.383333	0.416667	0.45	0.483333	0.516667	0.55	0.583333
Rows correspond to individual particles
*DMSO data provided in source data - figure 2 - sheet panel f
-0.0361773	0.0479815	0.00925289	-0.0241299	-0.024797	0.00143869	0.0237257	0.017918	0.0011464	-0.00577516	-0.00660163	-0.00316682	0.00429698	-0.000577404	1.13165e-05	0.00463503	0.00679934	0.000460612	-0.00533535	-0.00519348	0.00490621	0.0121035	0.00259812	-0.0190981	-0.0199319	-0.004236	-0.00689276	-0.0111687	0.0130142	0.00532173			1241.17	3231.31	5273.89	6073.22	6137.46	2806.91	221.36	-36.3917	-2.31824	1.6299	1.61759	12.7995	35.2361	42.4566	49.1561	67.7244	70.5572	71.2362
0.050159	-0.0196117	-0.0300041	-0.00219152	0.00185509	-0.00737285	-0.00506289	0.00796378	0.0194866	0.0229419	-0.000647882	-0.0108594	-0.0130866	-0.00105298	0.00491831	0.00683559	-0.00337533	-0.00888728	0.000551673	0.00839832	0.0127513	0.00254014	-0.00212098	-0.0096927	-0.005112	-0.0044808	-0.0148456	-0.00274188	0.0200651	0.00314372			3033.61	6268.22	4954.46	4617.29	4609.59	3272.71	2010.85	827.531	246.673	97.6542	101.118	83.9927	96.6035	111.389	127.733	148.506	143.999	136.222
0.0148704	0.00438565	-0.0259665	-0.0231522	0.00258624	0.0048884	-0.00156824	0.0123954	0.0160501	0.00538921	-0.00473054	-0.000700646	-0.00139515	-0.000604674	0.000719535	0.00468328	0.00495085	0.00269641	-0.00304823	-0.00588099	-0.00624035	-0.00616648	0.00487816	0.0151865	0.00344059	-0.011946	-0.0168332	0.00041382	0.00442124	0.00560039			737.709	3034.3	5240.03	6518	5385.45	3474.33	1681.35	545.213	108.927	7.73562	3.27555	5.89593	20.7588	31.8058	44.4356	67.0465	71.5097	76.0633
-0.0191151	0.0239339	-0.00306724	-0.0245723	-0.00819877	0.00715189	0.0184091	0.0155999	0.0140423	0.00410339	0.0101401	0.00678626	-0.00300297	-0.00147453	0.00988986	0.0150822	0.00258877	-0.0219668	-0.0220752	-0.0115213	-0.0157475	-0.015534	-0.0181401	-0.00841237	-0.00251519	0.00363618	0.00355183	0.000880173	0.0185824	0.0231537			3211.07	2524.37	2838.41	3665.28	3257.61	3411.9	2428.37	1299.87	634.803	331.344	149.186	116.868	88.238	89.0003	110.874	162.681	157.385	180.254
0.0499123	0.005211	0.0331639	-0.0574918	-0.0777571	-0.0365122	0.0176126	0.0308289	0.0246951	0.0117841	-0.00210641	-0.00357659	0.00234112	0.00129763	-0.000922101	-0.0138471	-0.0128448	0.00314004	0.0041927	-0.00577385	-0.0195448	-0.0163018	0.00496055	0.00533847	-0.00294994	-0.00182831	0.00751895	0.00398363	-0.00125051	-0.0125647			1677.24	3712.73	1809.69	2567.06	3267.66	2860.81	1528.89	532.88	221.497	150.073	100.286	66.6376	36.0267	22.4898	15.1766	14.8697	14.7876	10.0411
0.00914506	0.0259433	-0.00715277	-0.0559421	-0.0218929	0.0172282	0.0173906	0.00379432	0.00586352	0.0130975	0.00411687	-0.00166668	-0.00289305	-0.000708181	0.0121362	0.00367218	-0.0038742	-0.0118959	-0.00753836	-0.0141813	-0.00592377	-0.00322767	-0.00613357	-0.000719717	0.012067	0.0055323	0.00750539	-0.000133833	-0.00116925	-0.00200156			955.335	1804.9	2698.15	3376.46	3311.17	2328.79	1131.73	395.899	122.436	115.127	88.0876	77.4562	58.2371	59.4702	48.6896	43.0167	41.4308	40.0875
0.1091	-0.0654739	-0.0347964	-0.0480101	-0.0190931	-0.0275833	-0.0146842	0.0199641	0.0343551	0.0236542	0.0086418	0.00467853	0.00838078	0.00330622	0.00168388	0.00288467	0.00399907	0.00472643	0.00527839	0.00240308	-0.00789635	-0.0143193	-0.00765673	0.00725383	0.0117437	-0.0109842	-0.0279526	-0.0107723	0.0306998	0.000403331			4596.12	3836.16	2423.88	3214.16	3256.68	3375.36	2044.07	818.39	245.347	112.183	61.3295	57.4293	52.6398	62.3788	73.6226	82.4015	91.3068	92.2139
0.0137441	0.033288	0.011041	-0.0605774	-0.0502415	-0.0117643	0.0173618	0.0234734	0.0217427	0.011246	0.0055637	0.00118567	-0.000214544	-0.00149447	-0.00611246	-0.00928007	-0.00928496	-0.0053065	-0.00280806	-0.00169169	-0.00707771	-0.00205709	-0.0065706	-0.0148062	-0.00954121	0.00044808	0.00265526	0.0083398	0.00777932	0.00556651			134.983	441.608	963.15	1653.28	2199.03	2262.33	1476.1	725.989	300.52	137.145	64.6185	28.1702	10.6985	14.2462	22.4622	31.8666	39.6568	48.2214
0.012616	0.0262652	0.034949	0.0173351	-0.014344	-0.0351244	-0.0584412	-0.0615067	-0.0401886	-0.0116061	0.0262791	0.0395667	0.0323191	0.0192987	0.00432843	-0.00449806	-0.012763	-0.011331	-0.00127028	0.00463499	0.0112884	-0.00206732	-0.00770529	-0.00845667	-0.0043753	-0.0106188	-0.0236178	-0.00407835	0.0140481	0.00872273			5080.87	3727.62	2619.18	2252.3	2485.82	2844.33	3131.86	2872.57	2023.76	1150.1	406.833	162.566	89.9774	82.797	83.5258	76.6459	76.2002	73.8103
0.0439318	-0.00101902	-0.0163572	-0.0118831	0.0205694	-0.010254	0.00545378	0.000462968	-0.012003	-0.0259627	-0.00442464	0.00731301	0.0178938	0.0146529	-0.00154731	-0.0155607	-0.0290046	-0.0204053	0.0187421	0.0207916	0.0110387	-0.0160184	-0.0249959	-0.0161115	-0.015587	-0.0179107	-0.00770869	0.0160649	0.0386382	0.0202352			408.413	828.873	716.631	1079.27	1532.34	1693.56	1674.57	1499.3	967.465	677.708	325.819	155.269	72.2499	28.955	23.1859	34.1608	45.1884	46.7086
-0.0151178	-0.00214474	-0.0125959	-0.0022764	-0.000317303	0.00193936	-0.00511997	0.00550115	0.0202708	0.0129833	0.00702318	0.00834336	0.00274306	0.00071121	-0.0022645	-0.00689827	-0.00337929	-0.00498525	-0.00925645	-0.00686543	0.0018544	-0.00283234	-0.0107519	-0.00969933	-0.00629794	0.000165409	0.00182188	-0.0114097	-0.0155853	0.0440389			1023.07	2311.84	2950.52	2612.98	2139.04	1802.25	1324.94	962.03	828.454	654.051	536.437	372.45	226.028	159.411	143.595	155.416	185.993	200.674
0.00290374	-0.000828463	0.0165	0.015336	0.0106426	0.0100207	0.00365363	-0.0059154	-0.0108485	-0.0102483	-0.00258395	0.000250614	0.00447351	0.00308596	0.0022583	1.42238e-05	-0.00442711	-0.00740219	-0.00601394	-0.00213416	-0.00234635	-0.000744327	-0.00345958	-0.0117426	-0.00320234	0.00137895	0.00438009	0.0146547	0.0253159	0.00852655			3498.2	4061.01	4789.01	5237.64	5172.08	4526.94	3559.25	2558.88	1638.1	1121.79	793.056	498.935	292.546	196.688	91.052	25.747	24.5024	35.3436
0.00780594	-0.00300838	-0.00143313	-0.0049853	0.00544155	0.0120949	0.00970376	-0.00298822	-0.0118632	-0.00670159	0.00900452	0.0104884	0.00723003	-0.00638523	-0.0226801	-0.0128684	-0.00126699	0.00315686	0.00470615	0.00772228	0.00876007	0.000690264	0.000915465	0.000995478	-0.00277344	-0.00943429	0.000948192	0.00266857	-1.93715e-05	0.00974579			1141.1	2542.67	2957.23	2860.29	2765.5	2434.91	2130.58	1505.59	1214.5	851.714	582.922	382.063	190.611	158.681	113.026	94.1821	53.8389	35.6429
-0.0153509	0.0242965	-0.000326624	0.0222973	0.012613	-0.0136169	-0.0505623	-0.0588505	-0.0456438	0.00962353	0.0437545	0.0369477	0.0207044	0.00818912	-0.00567586	-0.0145213	-0.0112162	-0.00634454	-0.00514928	-0.00751842	-0.00724858	-0.0103744	0.000648779	0.00265625	-0.00929144	-0.0138116	-0.00129836	-0.00637852	0.0069212	-0.00182398			1213.86	1795.98	3593.51	3235.44	3041.76	3599.8	4269.64	4665.95	3967.9	2143.71	625.924	174.341	68.5956	33.1974	41.959	158.336	370.638	543.979
0.0204274	0.0320949	0.00182395	-0.00310134	-0.022245	-0.0447902	-0.0598527	-0.0740267	-0.0449435	0.00246214	0.0383229	0.0478345	0.0433233	0.0303878	0.0184597	0.0113912	0.0150676	0.0120075	-0.00379424	-0.0133403	-0.0222384	-0.0165678	-0.00606118	-0.0137182	-0.0158283	-0.0156489	-0.0071439	-0.000747623	0.00144308	-0.00554758			486.906	811.487	1681.91	2693.74	3615.15	4074.26	4006.18	3474.41	2743.7	1731.52	978.408	482.173	209.756	114.416	93.1233	92.6513	96.1039	118.452
0.0318377	-0.0283079	-0.00479892	-0.0034724	-0.00360373	-0.00139016	-0.0103589	-0.0220104	-0.0151898	-0.00329938	0.00832785	0.0130197	0.0135064	0.00859061	0.000310004	-0.00432039	-0.0121853	-0.0117663	-0.0103695	-0.00519493	-0.00219147	-0.00580929	-0.0130969	-0.00669339	0.00649619	0.0247999	0.00205367	-0.0183663	-0.00925277	-0.00414945			2152.54	4426.1	5880.99	5191.18	5318.2	5849.71	6035.51	5856.52	5142.47	4032.12	2946.04	1905.47	1053.28	447.559	170.042	87.0076	70.4711	69.3254
0.276632	0.222653	0.246569	0.17213	0.214322	0.0422731	0.0107175	0.0461016	0.0323961	-0.00409256	-0.128774	-0.345904	-0.289322	-0.329968	-0.293333	-0.032492	0.13344	0.150138	0.109042	0.0714412	0.0579663	0.0456484	0.0332592	0.030044	0.0241712	0.014253	0.00455301	-0.0049744	0.00673219	-0.00783191			585.689	657.283	633.092	672.28	751.999	1156.82	1728.55	2800.9	4859.17	7716.23	11094.4	12650	11778.1	9600.41	6139.67	1597.55	15.6658	-26.0398
0.038864	0.0118849	0.0122975	0.0189289	0.0237437	0.0171827	0.00266069	-0.0205552	-0.0533224	-0.0772155	-0.0847154	-0.0676304	-0.0387845	-0.00361498	0.0232874	0.0321351	0.028261	0.0168157	0.00965422	0.008722	0.0122332	0.00911417	0.00171066	-0.00205186	-0.0041282	-0.016182	-0.0251031	-0.0170788	-0.00316557	0.00241791			583.684	505.765	466.278	489.029	580.072	526.508	673.156	1146.68	1993.55	3111.67	4019.79	3904.62	3090.06	1767.56	633.591	159.679	20.7268	24.7635
0.0177424	0.0123379	0.00127176	-0.0227178	-0.0271459	-0.0123097	-0.00397436	0.00110193	-0.00454344	0.00335703	0.0129117	0.0138198	0.0102923	0.00404625	0.0013884	0.00173972	0.00676617	0.0131908	0.00489778	-0.00671894	-0.00964584	-0.00355642	-0.00157138	-0.00391133	-0.0153238	-0.0197841	-0.0182735	-0.0137738	0.0242826	0.0328617			621.436	790.208	897.529	1172.43	1307.59	1313.34	1173.17	1093.82	1002.75	843.063	731.599	598.036	458.465	412.681	296.243	200.385	135.156	108.731
0.0221228	0.00437546	0.0103896	0.0178392	0.00530697	-0.00653989	-0.0139424	-0.0173402	-0.0173598	-0.0161742	-0.0135606	-0.00877471	0.0030508	0.00712549	0.0204641	0.0228763	0.0197201	0.0184743	0.0108892	0.00762473	0.00328041	0.00422393	-0.000235408	-0.00681226	-0.0070871	-0.00242585	0.00787382	0.0122074	0.00361889	-0.00985305			2163.59	2202.29	2403.33	2363.85	2752.23	3121.27	3691.46	4260.06	4772.18	4637.89	4059.51	3456.49	2524.04	1563.34	859.963	374.694	125.219	40.9546
-0.00837416	-0.0213727	0.0575338	0.0308314	-0.00178868	0.00565629	-0.00168696	-0.0235331	-0.0386563	-0.0435369	-0.0403168	-0.0251153	-0.00691099	0.00891733	0.01833	0.0191266	0.0127781	0.00692574	0.00208365	-0.0018627	0.0064964	0.0104846	-0.00180691	-0.00956238	-0.00316643	0.00675179	0.00123917	-0.012556	-0.0134962	-0.00519757			452.77	2242.31	1792.51	1085.12	2202.39	2800.23	4010.68	5333.47	5785.68	5939.48	5544.13	4599.85	3504.05	2357.48	1231.81	569.083	197.806	71.3036
0.0235155	0.00872954	-0.011194	0.0295027	0.0165686	-0.0188235	-0.0162143	-0.0128383	-0.0276505	-0.0285875	-0.0264256	-0.018962	-0.0231955	-0.00764547	0.0121212	0.0100623	0.00968605	0.0107443	0.0150529	0.00434337	-0.0143936	-0.0163674	-0.00811854	0.00165811	-0.00584752	-0.00995347	-0.00797533	0.00269845	0.000723884	0.00566406			3969.59	3240.62	2589.15	2074.64	2341.55	3514.48	3997.87	4442.78	5083.69	5031.86	4972.29	4358.44	3840.09	3536.95	2604.45	1770	817.778	432.373
0.00772355	0.029342	0.00707089	-0.0276388	-0.0199154	0.000474594	-0.00763579	-0.0117915	-0.0128344	-0.00267915	-0.00365298	-0.00454453	-0.00290505	-0.00246132	0.00426364	0.00959142	0.008417	0.0102043	0.00296003	-0.00385621	-0.00559411	-0.00844327	-0.0140486	-0.00968016	-0.00651047	-0.00295351	0.000429082	-0.0049122	-0.00175523	0.013142			261.553	593.777	935.327	1517.71	1878.18	1816.38	1985.62	1936.27	1854.71	1915.26	1884.74	1753.72	1588.84	1353.23	963.522	705.905	535.576	451.206
-0.0158278	-0.00234012	0.000856271	0.0137937	0.019518	0.0275503	0.0216426	0.0139378	-0.0132907	-0.0671438	-0.106193	-0.0949427	-0.0492549	-0.00897286	0.021631	0.0262634	0.0183474	0.010291	0.00948265	0.0120907	0.00857294	-0.00226676	-0.00658698	-0.0132474	-0.0101097	-0.00187536	-0.0078965	-0.00395453	-0.023059	-0.0115336			171.504	374.053	628.765	1078.71	1571.15	2058	2380.31	3341.69	4950.55	6383.04	7131.01	6722.47	5565.06	4357.62	2868.26	1913.74	1331.17	960.973
0.00307116	0.00489072	0.00589593	0.0105032	0.00280301	-0.0059535	-0.00653423	-0.00829277	-0.0118053	-0.0105566	-0.0116051	-0.00914564	-0.00381406	0.00275443	0.00526417	0.00690861	0.00375648	0.000276657	0.00336579	0.00156472	0.00135303	-0.00125922	0.00378974	-0.00150497	-0.00743815	-0.0126097	-0.00367831	-0.000334251	-0.00416049	0.0119394			715.181	1260.11	1758.5	1990.88	2172.89	2264.6	2616.67	2760.6	3077.55	3214.75	2837.1	2444.12	2075.42	1671.17	1272.22	857.828	551.161	375.983
0.0160943	-0.0308761	-0.0341216	-0.0122549	0.018736	0.0189827	0.00911891	0.00399096	-0.000884898	-0.0110851	-0.00891852	-0.000531316	0.00278219	0.00559472	0.00159197	-0.00417625	-0.00582838	-0.00718009	-0.00128982	0.000151721	0.000478736	0.00222176	-0.00148416	0.000339815	0.00376873	0.0101477	-0.00381261	-0.0199665	-0.00809572	-0.00505816			5090.92	4744.6	4155.46	3786.26	3839.73	3727.01	3474.75	2978.92	2570.96	2317.84	2164.41	2108.52	1919.67	1588.82	1463.65	1502.65	1488.94	1393.28
0.060018	0.0419635	0.0463647	0.0651279	0.0862227	0.0768428	0.0256109	-0.0491976	-0.13103	-0.151783	-0.129859	-0.140532	-0.136913	-0.13223	-0.0797788	0.0254536	0.0896703	0.114743	0.0778358	0.0336236	0.00154786	-0.0170082	-0.0154362	-0.00449403	-0.00986516	-0.0170156	-0.025717	-0.0250623	-0.0159061	0.0070099			177.49	288.362	467.789	530.891	534.079	584.511	1069.87	2079.78	3277.09	4399.23	5401.88	6754.8	7526.35	7288.24	5750.58	3984.6	2367.27	1372.03
0.0209507	0.0193892	-0.0214567	-0.0100788	-0.00797227	0.00389693	0.0125735	-0.00141953	-0.0181909	-0.0237247	-0.0277906	-0.0260069	-0.0179702	-0.0160561	-0.013865	0.00225923	0.0118239	0.020699	0.0195995	0.0136476	0.00120706	-0.0145805	-0.0241061	-0.0245603	-0.0118785	0.00554607	0.0241962	0.00638577	-0.0299077	0.0072198			596.419	742.513	775.134	797.99	1070.19	1226.72	1359.61	1618.96	1854.8	2032.23	2165.2	2051.18	1951.66	1704.78	1533.01	1131.02	757.503	441.086
0.0710643	0.00561698	0.0112336	0.0100666	0.0455193	0.0855838	0.119991	0.113505	0.0801623	0.0296999	-0.0386363	-0.143855	-0.242106	-0.309951	-0.376178	-0.333403	-0.205295	-0.0436084	0.0719682	0.140495	0.128816	0.0928579	0.0603386	0.0231651	0.0138039	0.00772107	-0.00404546	-0.0309846	-0.0409327	0.0343156			129.901	127.62	133.095	84.2921	66.6281	118.07	264.647	604.73	1183.84	2090.13	3384.72	4839.34	6142.15	6939.67	6606.45	5222.99	3280.01	1701.65
0.0273193	0.0211727	0.00608895	-0.0106898	-0.0367291	-0.0267501	-0.0180776	-0.0170643	0.00510552	0.0169613	0.0157351	0.00348977	-0.0128023	-0.0136538	-0.0128794	-0.0100004	-0.0082309	-0.00912373	-0.00496847	0.00144176	0.00759469	0.00288203	-0.00453845	-0.00268384	0.00627664	0.0173194	-0.00336133	-0.00796631	-0.00234149	-0.0167144			390.639	844.469	1282.53	1196.32	1052.91	1029.32	1294.7	1519.09	1399	1303.72	1306.14	1367.75	1355.75	1189.6	1126.65	989.622	969.32	962.392
0.0412073	0.00677919	-0.00556449	0.00297346	0.0099739	0.00674552	-0.00647234	-0.0212128	-0.0323995	-0.0329686	-0.0271406	-0.0238025	-0.012112	-0.00338925	0.00148311	0.00290875	0.00586522	0.0188359	0.0218189	0.0206269	0.00323073	-0.00760364	-0.0184068	-0.0128652	-0.00167101	-0.0113845	-0.0144905	-0.00204212	0.018837	0.00137453			711.864	1654.61	2247.37	2466.2	2677.8	2685.37	2791.8	2706.97	2683.13	2621	2417.58	2262.22	2062.87	2124.81	2092.85	2019.57	1770.14	1283.55
-0.000451846	-0.00581294	0.0140144	-0.0138579	-0.01876	0.000490669	0.0189569	0.0094536	-0.0132594	-0.0263286	-0.0115466	0.00364177	-0.00245013	0.000110988	0.00845568	0.0093962	0.000346623	0.0056753	0.0178772	0.0104598	-0.00822408	-0.00910841	-0.022855	-0.0617451	-0.0542352	-0.0967798	-0.0210018	0.0425328	0.0510137	0.177508			5303	4346.08	3584.16	4686.85	5969.6	6295.14	6440.74	6475.5	6498.8	6862.58	6039.22	5153.27	5244.28	4929.45	4960.44	4962	4672.71	4283.07
-0.00518841	0.000241989	0.00273496	-9.30566e-05	-0.00227244	-0.000538762	0.0160037	0.00700964	6.68335e-05	-0.0105543	-0.0125321	-0.00475276	-0.00535509	-0.011139	-0.00996079	-0.00555588	0.00458546	0.0109661	0.0110323	0.00347771	0.00196469	-0.00725931	-0.00153294	-0.00195637	-0.00464465	-0.00214181	0.0113344	9.10572e-05	-0.00908048	0.00228389			1120.16	1669.86	2205.88	2549.3	3226.56	3464.89	3490.43	3796.84	3660.42	3629	3442.07	3245.53	2858.82	2799.99	2367.31	2050.6	1600.08	1249.45
0.0364298	0.0243698	0.0291598	0.0150467	0.00970569	-0.0102431	-0.0479363	-0.0701609	-0.0834676	-0.0527089	-0.0320998	-0.0126533	0.00197415	0.0122281	0.0188446	0.011447	-0.0140158	-0.0271693	-0.029811	-0.0227424	-0.00713283	0.00713853	0.0038465	0.00298864	0.00300497	0.00737511	-0.00651198	-0.0297414	-0.0430295	0.0416649			326.638	792.56	1139.37	1245.34	1559.49	2341.39	3454.37	4460.8	5077.94	4878.47	4536.57	4013.32	3413.36	2624.48	1983.76	1396.76	1073.15	787.807
-0.00669203	-0.00304862	-0.00973008	-0.00426394	0.0114707	0.00379246	0.0100148	0.0127467	0.0110288	0.00343052	-0.00302216	-0.00344749	-0.00399704	0.00591397	0.00610573	-0.0013063	0.0064662	0.00664586	-0.000173545	-0.0120872	-0.010825	0.00307065	0.00600341	-0.00216089	-0.0194227	-0.0261511	0.00157963	0.0156135	0.0144261	0.0187447			194.142	253.964	312.181	350.681	465.652	579.925	641.021	616.815	645.329	657.085	682.402	656.272	686.3	733.333	725.897	769.387	744.148	659.284
-0.0248185	0.00112564	0.00388655	0.0026096	0.0164937	0.0167531	0.0118876	-0.00654155	-0.0190553	-0.0241168	-0.0141186	-0.00960153	-0.00697826	-0.0141946	-0.0131333	-0.00764491	0.00686786	0.0112381	0.00751929	-0.00678124	-0.00685553	0.00448252	0.00850198	0.00164036	-0.0154429	-0.0173755	-0.0142416	0.000834297	-0.00150015	0.00727512			699.533	734.022	1411.12	1614.66	1384.42	1703.8	2055.64	2717.3	3294.18	3549.74	3490.42	3308.5	2764.08	2375.94	2060.3	1748.98	1505.88	1234.84
0.0302906	1.10869e-05	0.0131645	-0.0205217	-0.0149053	0.00444749	0.0202317	0.0291069	0.0258679	0.0172815	-0.0120469	-0.0381196	-0.0630361	-0.0668075	-0.0744955	-0.0644064	-0.0458318	-0.023546	0.0028917	0.0302641	0.0302725	0.0263318	0.0234038	0.0115324	-0.00496159	-0.00827697	0.00588782	0.00596607	-0.0218565	0.0050402			1556.04	1949.63	632.512	833.495	1019.11	1390.89	1871.25	2397.08	2676.25	3508.89	4175.19	4994.34	5421.67	5515.22	5287.49	5047.64	4607.69	4086.96
0.0202731	0.0256069	-0.00506878	-0.0089626	-0.00967262	-0.0162553	-0.0165955	0.00826661	0.022381	0.0366294	0.0470383	0.032209	0.00691838	-0.0558218	-0.119404	-0.160435	-0.149051	-0.115447	-0.0545841	-0.0160348	0.0108382	0.0295878	0.037441	0.0245417	0.0325166	0.0165967	0.00597101	0.00794073	0.0403819	-0.0279445			49.7111	59.0405	76.5284	84.0274	79.8796	87.3262	130.07	191.394	306.603	510.7	809.821	1178.34	1596.13	2014.12	2304.11	2522.91	2378.39	2091.72
0.0222765	-0.0103757	0.00113782	0.00843538	-0.0254417	-0.0179166	0.00353255	-0.0121717	-0.00425813	0.0089014	0.0181791	0.00696627	-0.00243198	-0.00744066	-0.00781664	-0.0100743	-0.015034	-0.0165162	-0.00993544	-0.0084178	-0.0106625	0.00127568	0.0127308	0.0145664	0.00446408	0.003174	-0.0131133	-0.00646874	0.0022692	-0.0042687			2875.64	2063.58	1559.86	1486.99	1478.73	1419.2	1552.21	1862.48	1905.83	1754.26	1542.38	1551.83	1734.84	1932.57	2054.51	2144.06	2181.17	2058.03
0.0035157	0.00159347	-0.00556407	-0.0122425	-0.0122092	-0.00135635	0.00813718	0.00655585	0.0173262	0.0249015	0.0302787	0.0196577	0.0128975	0.00571478	0.00240889	-0.00264187	-0.00747759	-0.0163739	-0.0213998	-0.0244775	-0.0336782	-0.0286222	-0.0283667	-0.0139611	-0.00855547	0.00980617	0.0273336	0.0477342	0.0167533	0.00713506			2076.26	3869.48	5018.4	5644.21	5249.89	5109.54	4807.41	4793.69	4528.91	4902.51	5164.68	5227.72	5577.86	5696.11	5505.83	5353.96	5231.73	4880.11
-0.0399152	-0.0621406	-0.0361835	0.0376894	0.0347409	0.0144285	-0.00623729	0.000549684	0.0133417	0.0262763	0.0328095	0.0430201	0.0361644	0.00751127	-0.0335358	-0.113917	-0.190466	-0.224465	-0.19754	-0.129135	-0.0515119	0.0130698	0.0769233	0.0984634	0.0690463	0.0155633	-0.00358023	0.0170869	-0.00969084	0.00318207			66.4481	103.036	128.684	164.588	247.597	258.426	331.58	411.816	679.35	1141.56	1586.42	2141.86	2897.79	3769.69	4295.38	5050.57	5438.96	5469.42
0.0504627	-0.0020957	0.00336507	-0.0021528	-0.0109067	-0.00842229	-0.00511555	0.00722405	0.0132005	0.012351	0.00337296	-0.0104467	-0.0187642	-0.027816	-0.0349093	-0.0451678	-0.0527361	-0.0421579	-0.0245018	-0.00971355	0.00660066	0.0210849	0.020966	0.0140828	0.000766147	0.00272148	0.0151304	0.0132285	0.00110678	-0.00908503			4570.85	1978.39	1509.74	487.808	596.408	749.717	988.433	1369.04	1841.4	2692.23	3302.5	3979.64	4306.91	4801.1	5278.71	5325.56	5498.19	5417.61
-0.0216119	-0.0435857	-0.0165197	-0.00781451	-0.0140206	-0.00443525	0.00541374	0.0112577	0.0144742	0.0126319	0.00396008	0.00420493	0.0149589	0.0261014	0.0370135	0.0275957	-0.0258583	-0.122374	-0.267203	-0.256338	-0.142865	-0.0393372	0.0338518	0.0706578	0.0838967	0.0597099	0.0374327	0.0298309	0.00737118	-0.0114016			94.2165	81.2105	155.136	179.805	188.298	233.23	296.839	384.847	587.349	809.753	1314.69	1728.92	2029.73	2276.74	2740.9	3493.43	4924.37	6578.35
0.0128108	-0.00633031	-0.0250073	-0.0193975	-0.00289522	0.0130534	0.0165527	-0.0141527	-0.0286467	-0.0208615	-0.0419164	-0.0420436	-0.00196482	0.00843317	-0.0200924	-0.0447058	-0.0657804	-0.0668882	-0.0460224	-0.0793008	-0.0981611	-0.0260242	0.0228233	0.0539221	0.0337002	-0.0134051	-0.0355591	-0.0028599	0.0117876	0.0118187			1445.59	2050.38	2634.79	2516	1793.61	1909.26	1884.74	2704.07	3827.64	3449.13	3620.37	4356.25	4708.59	4945.63	4333.11	4727.9	4578.94	4197.53
0.0291683	0.0455987	0.00728777	-0.0416933	-0.0384043	-0.02452	0.000611849	-0.0101518	0.0065994	0.00418405	0.00577826	-0.0153185	-0.0381871	-0.0687856	-0.079017	-0.0781587	-0.0622195	-0.0180115	-0.00764048	0.0014893	0.00296895	-0.00427897	-0.0133013	-0.0129848	-0.0150174	-0.000169886	0.00467666	0.00307953	0.00699844	0.0234974			175.522	257.078	579.212	873.688	1042	1118.37	999.247	1045.07	1102.86	1085.2	1196.17	1378.47	1551.18	1686.24	1723.61	1757.15	1682.8	1429.21
-0.0176787	-0.00900334	-0.0174446	-0.00780102	0.0103316	0.0338572	0.0395911	0.0255242	0.0153156	0.00120628	-0.00646744	-0.0133258	-0.00994522	-0.00453828	-0.0127744	-0.0163628	-0.0411254	-0.0760997	-0.09116	-0.100052	-0.0785548	-0.0374576	0.000938522	0.0216065	0.024133	0.0307124	0.042609	0.0407108	0.0261541	0.00856882			101.03	84.1564	83.0997	66.8917	76.5605	106.705	143.906	185.482	287.04	382.401	474.622	648.679	874.203	1204.27	1661.84	2022.49	2566.79	2988.73
-0.00605727	0.0124349	-0.00266248	-0.00916117	0.00620503	0.0126714	1.52724e-05	-0.0135708	-0.0153387	-0.00309426	0.00319413	-0.00244166	-0.0158848	-0.0206531	-0.0122107	0.00463883	0.0167511	0.0222194	0.0157561	0.00705926	-0.00498028	-0.0113515	-0.0112246	-0.00971041	-0.00147776	-0.00247699	-0.00560749	0.00112564	0.00967275	-0.00821391			1582.77	2093.11	2393.34	2612.65	2726.25	2710.64	2908.02	3052.66	3184.84	3327.62	3276.95	3195.21	3010.51	2942.73	2862.82	2821.26	2836.23	2787.72
-0.00523845	-0.00443237	0.025121	0.0047263	-0.00812641	0.00890992	0.00845256	0.020488	0.0365299	0.0451703	0.0459359	0.0214701	-0.0293501	-0.0849096	-0.149052	-0.176902	-0.170971	-0.149296	-0.0960993	-0.0397947	0.0188276	0.043998	0.0425445	0.0450138	0.0399915	0.0153327	0.0151708	0.0256003	0.00737331	0.0233744			137.679	120.105	126.065	115.435	167.791	244.243	282.686	360.036	495.544	693.85	982.457	1447.76	1945.33	2407.26	2754.08	2822.32	2849.53	2759.16
-0.00975913	-0.0123121	-0.0214498	-0.0248695	-0.0278912	-0.0252922	-0.0138719	-0.0156353	-0.00359328	0.00122675	0.0145497	0.0187637	0.0336108	0.039848	0.0272304	0.00108507	-0.0477615	-0.106928	-0.157225	-0.190241	-0.161745	-0.0858577	-0.0102913	0.0466382	0.060136	0.04794	0.0343891	0.0200498	0.0133792	0.0095314			144.219	256.4	192.505	246.035	289.965	405.405	437.494	447.357	520.784	643.982	802.172	761.395	989.147	1475.13	2458.98	3408.18	4395.34	5584.89
-0.0110336	-0.0137603	-0.0331097	-0.0224835	-0.0105065	-0.0086786	-0.00902951	-0.0110729	-0.0126388	1.00679e-05	0.0125726	0.0227466	0.0343412	0.0500901	0.063112	0.0583315	0.0129695	-0.0987695	-0.271983	-0.304418	-0.230316	-0.121442	-0.0233991	0.0474947	0.112047	0.126055	0.0896313	0.0349972	0.0119343	0.0708132			169.694	187.426	194.642	206.103	163.666	160.924	154.301	154.84	160.494	169.178	210.624	302.789	416.648	676.465	1025.34	1528.37	2516.85	3765
-0.0228254	-0.0277355	-0.025754	-0.0466744	-0.0367223	-0.0168446	0.00269538	0.00496268	0.00636382	0.0129803	0.0184541	0.0146191	0.00373047	0.0107341	0.0198978	0.0661657	0.0891066	0.0719224	-0.107143	-0.338046	-0.363313	-0.234097	-0.130186	-0.0247456	0.0734343	0.137376	0.121854	0.0970041	0.0842308	0.0937859			100.48	89.7474	93.2487	90.583	164.005	247.742	369.467	400.141	480.824	613.289	689.008	814.588	917.873	892.829	816.788	971.963	1327.5	2477.6
0.0154171	0.0101483	0.00419079	0.0153825	-0.00115457	-0.00632347	-0.0088726	-0.00458719	0.00699773	0.0121013	0.00820114	0.0048706	0.000121567	-0.00648709	-0.0141281	-0.00982155	-0.00691227	-0.00361998	-0.0133584	-0.0311382	-0.0399112	-0.0276135	-0.00911279	-9.60076e-05	0.00260813	0.00365973	0.0163326	0.0242875	0.0270397	0.0347845			346.394	571.064	708.536	781.528	809.427	833.077	904.551	961.679	1080.68	1312.84	1339.62	1697.48	1956.39	2075.31	2390.65	2466.92	2519.46	2732.78
-0.0729238	-0.0529215	-0.00882956	0.0102301	0.0155122	0.00501344	-0.0139448	-0.016188	-0.0185373	-0.0119306	0.00124661	0.0236975	0.050669	0.0548846	0.0232728	-0.00968303	-0.0641726	-0.123382	-0.154821	-0.145753	-0.109577	-0.119425	-0.119094	-0.0804231	0.0174398	0.0658225	0.0690163	0.0541107	0.0492966	0.051211			-25.1307	14.7208	42.772	94.9519	126.089	132.769	175.232	223.283	239.485	298.234	395.108	546.237	751.889	1253.49	1899.39	2385.88	3397.67	3883.99
0.0215531	0.00363284	0.0189483	0.01952	0.00209985	-0.00583608	-0.021337	-0.0360933	-0.0509034	-0.0506438	-0.0492629	-0.0395809	-0.0227486	-0.0142168	-0.0100742	-0.016254	-0.0211125	-0.0103446	-0.0127281	-0.014268	-0.0173486	-0.0177318	0.00444113	0.00277843	-0.0809743	-0.18238	-0.0592578	0.0787263	0.123553	0.0798505			182.573	41.9957	66.4978	99.4592	100.968	141.178	186.529	306.769	500.228	945.649	1357.94	1841.51	2508.97	2724.21	3284.31	4262.69	4744.89	4992.96
-0.0689345	-0.0347582	-0.00344956	0.0196366	0.0354995	0.0295198	0.0193332	-0.00156243	-0.0127094	-0.0120807	0.0021879	0.0201039	0.00772416	-0.0191541	-0.0412903	-0.0346723	-0.0203243	-0.00129316	0.00139962	0.0162647	0.0162536	0.0308158	0.035112	-0.00165088	-0.11415	-0.195999	-0.123483	0.0244058	0.165771	0.255711			33.1328	35.6522	42.5231	75.1294	134.05	146.738	175.657	228.237	353.686	419.317	448.222	467.252	574.728	704.04	793.956	894.308	1076.22	1280.48
[truncated: 12 more columns]

## Sheet: 3e
	DMSO			CK666			Blebbistatin			SMIFH2
	Fraction engulfed	F-actin peak intensity	F-actin peak width	Fraction engulfed	F-actin peak intensity	F-actin peak width	Fraction engulfed	F-actin peak intensity	F-actin peak width	Fraction engulfed	F-actin peak intensity	F-actin peak width
		x10^4 (a.u.)	(mm)		x10^4 (a.u.)	(mm)		x10^4 (a.u.)	(mm)		x10^4 (a.u.)	(mm)
	0.0813	NaN	NaN	0.1776	0.32645	1.1727	0.2403	0.1737	1.4942	0.2129	0.5731	0.9771
	0.1542	1.0664	0.9914	0.2402	0.42022	1.4193	0.2786	0.6573	1.7131	0.2188	0.6023	1.3231
	0.2245	0.4192	1.3957	0.272	0.28611	1.2079	0.3123	0.3632	1.6825	0.2208	0.6485	1.0384
	0.2477	0.5754	1.1893	0.2912	0.1529	1.3285	0.3296	1.0839	1.1106	0.2222	0.3141	1.3783
	0.2551	0.8155	1.2411	0.3219	0.33092	2.0104	0.3401	0.37	1.6208	0.2253	0.3027	1.0268
	0.2626	0.4869	1.4463	0.3291	0.80597	1.3402	0.3592	0.0861	2.2384	0.2408	0.3483	1.1549
	0.2688	0.2616	1.4013	0.3416	0.15182	1.3622	0.412	0.3354	2.2716	0.2571	0.3187	1.1308
	0.2743	0.3542	1.2536	0.3458	0.38198	1.7837	0.4536	0.2544	2.0284	0.2707	0.2341	1.0812
	0.2782	0.6731	2.176	0.3553	0.20783	1.9272	0.4587	0.3104	2.6732	0.3117	NaN	NaN
	0.2798	0.5997	1.8862	0.3637	0.15972	2.308	0.4637	0.2082	2.1423	0.3176	0.1609	1.6377
	0.3099	0.6199	1.5146	0.3655	0.5242	1.4682	0.4908	0.6155	3.1616	0.3225	0.3073	1.0159
	0.3149	0.4483	1.3975	0.3869	0.15479	2.6341	0.4917	0.7594	3.3896	0.3292	0.507	1.6936
	0.3658	0.4538	1.9977	0.388	0.26869	1.7106	0.5	0.3333	3.4458	0.3314	0.2999	1.8416
	0.3858	0.4449	1.9125	0.4226	0.2818	2.2518	0.5034	0.2714	2.1275	0.3648	0.4245	1.1923
	0.4418	0.5687	1.3525	0.4398	0.44696	1.4731	0.5122	0.3029	3.3434	0.3864	0.3934	1.5054
	0.4601	1.0904	0.8518	0.4405	0.86748	2.0171	0.5139	0.3937	4.6732	0.3981	0.5865	2.2747
	0.4948	0.8362	1.4389	0.4729	0.20014	1.7889	0.516	0.6004	2.0919	0.4122	1.2213	1.3277
	0.5042	0.5331	1.7729	0.4827	0.49141	2.9037	0.5201	0.3821	2.7283	0.4778	0.4152	1.293
	0.5096	0.3609	2.635	0.4916	0.18388	2.2455	0.5376	0.3509	5.0534	0.4837	0.1296	2.7468
	0.5213	0.6351	1.3673	0.5018	0.236	1.6311	0.5922	0.1271	5.877	0.4867	0.4158	2.774
	0.5269	0.2985	2.0253	0.5293	0.08118	3.1741	0.5954	0.3262	3.8169	0.4965	0.561	1.6874
	0.536	0.8284	1.4655	0.537	0.26412	3.2354	0.5991	0.5673	3.1107	0.5119	0.5148	2.6169
	0.545	0.3186	1.4196	0.5417	0.28177	2.7594	0.6066	0.1592	2.7867	0.5239	0.1877	2.81
	0.5456	0.8468	1.7844	0.5561	0.46992	2.5101	0.6113	0.2497	2.731	0.5574	0.6979	1.9915
	0.546	0.2423	3.1571	0.5641	0.24456	0.8342	0.6114	0.3951	2.4676	0.5634	0.3047	2.9782
	0.5512	0.3757	2.928	0.5687	0.57585	2.3636	0.6292	0.2581	2.3773	0.5668	NaN	NaN
	0.552	0.3391	3.6466	0.5717	0.42686	3.2477	0.6318	NaN	NaN	0.5729	0.6993	1.6672
	0.5584	0.3382	3.1218	0.575	0.42158	2.1248	0.6432	0.5692	2.4649	0.6002	0.1881	3.4493
	0.5666	0.5452	1.6993	0.5786	0.50227	1.8931	0.6859	0.417	2.1868	0.6133	0.714	1.6088
	0.5787	0.3693	1.0992	0.5861	0.50257	3.365	0.6879	0.2798	3.7648	0.6343	0.121	2.6843
	0.5854	0.7333	1.8222	0.5872	0.315	3.0333	0.6887	0.1853	1.9944	0.6487	0.2686	3.6369
	0.5854	0.6339	1.9463	0.5889	0.47967	3.5475	0.6909	0.4982	1.8362	0.6554	0.6538	4.7192
	0.5888	0.58	2.5324	0.6046	0.19529	3.6951	0.7012	0.2182	3.9564	0.6565	0.3733	3.4595
	0.6506	0.189	1.9752	0.6056	0.26454	2.5472	0.7035	0.6919	3.1496	0.6584	0.49	2.1816
	0.6522	0.4913	3.4516	0.6086	0.24427	3.7243	0.7171	0.124	4.2233	0.6776	0.0732	4.495
	0.6523	0.5263	2.1905	0.6387	0.36929	2.9792	0.7242	0.512	3.4751	0.7169	0.284	2.7214
	0.6669	0.4432	2.3917	0.6631	0.29771	1.7439	0.7295	0.2791	4.3524	0.7307	0.6046	2.4123
	0.6783	0.2546	3.2655	0.6744	0.30702	4.2505	0.7314	0.4654	3.0668	0.7308	0.2303	2.1532
	0.6851	0.4588	1.4956	0.6757	0.17978	3.0053	0.7357	0.4913	1.4737	0.7498	NaN	NaN
	0.6868	0.8597	2.477	0.692	0.41909	2.4243	0.7371	0.2053	2.679	0.7764	0.4624	4.8347
	0.7059	0.5072	2.8037	0.7016	0.33249	4.1566	0.7515	0.4767	4.8009	0.7784	0.5618	1.7354
	0.7081	0.4421	1.9725	0.7289	0.41127	2.7393	0.7598	0.3044	6.4339	0.7849	0.5221	2.8773
	0.7096	0.7148	2.2414	0.7289	0.17171	3.6268	0.784	NaN	NaN	0.8083	0.8781	1.7068
	0.7172	0.4523	2.1405	0.7355	0.52376	2.104	0.8008	0.2613	5.4245	0.8119	0.3857	2.0889
	0.7253	0.6163	2.4767	0.7423	0.89382	2.3574	0.8024	0.3386	2.9721	0.8349	0.1833	3.2381
	0.7359	0.3762	3.2934	0.7757	0.51529	2.8058	0.8089	0.9284	2.0405	0.8469	0.3094	2.3381
	0.7431	1.0991	1.6455	0.795	0.22313	3.9014	0.8142	0.422	2.2749	0.8559	0.3129	5.2193
	0.7479	0.3831	2.1705	0.8065	0.24595	4.2602	0.8175	0.8327	4.6124	0.8675	0.3094	2.3499
	0.7715	0.3825	1.6982	0.8129	0.42344	4.7179	0.8626	1.0283	1.6442	0.868	0.6432	1.7792
	0.7813	0.8605	1.9494	0.8129	0.21989	3.5937	0.8707	0.4656	1.8863	0.8753	0.6957	1.4697
	0.7841	0.1341	4.1288	0.8312	0.26129	4.088	0.8722	0.1019	3.5084	0.8955	0.9106	1.1815
	0.7842	0.4667	1.3919	0.8438	0.55077	3.1352	0.8787	0.5822	1.5397	0.9158	0.3242	3.6136
	0.7926	0.1721	3.7548	0.8634	0.45007	2.5282	0.8847	0.198	2.5441	0.923	0.4269	2.4185
	0.8035	0.688	2.2558	0.8836	0.3644	4.4858	0.9065	0.2485	3.2053	0.9762	0.5234	1.3062
	0.8094	0.4879	2.2004	0.8838	0.61047	1.4714	0.9102	0.4738	2.7393	0.98	0.5563	1.4249
	0.8153	0.6716	1.8744	0.8853	0.35196	1.9972	0.9102	0.1979	4.9651
	0.8164	0.546	2.4424	0.8867	0.34988	4.5227	0.9163	0.1615	2.6799
	0.8203	0.6313	1.5656	0.9254	0.51828	4.6502	0.9166	0.3699	3.9289
	0.8216	1.1208	1.6574	0.9406	0.39777	2.5256	0.9171	0.156	4.3889
	0.8221	0.641	1.8846	0.9456	0.45621	3.4437	0.9285	0.4593	1.4925
	0.8327	2.0336	1.9308	0.9661	0.27474	3.5487	0.9432	0.1753	4.2454
	0.8453	0.5883	2.1107	0.9699	0.54933	3.2074	0.9585	0.1946	1.5341
	0.8639	0.6606	2.1449	0.9732	0.33159	1.7663	0.9621	0.4841	3.3625
	0.8725	0.4131	2.3123				0.9643	0.2745	2.7067
	0.893	0.4239	2.3959				0.9651	0.2653	2.4832
	0.9001	1.0507	1.5184				0.9678	0.4764	3.6625
	0.9809	0.6068	0.9584				0.9685	0.2637	1.5626
	0.9936	0.4418	0.47				0.9699	0.6188	5.06
							0.9709	0.3627	6.6223
							0.9737	0.4632	2.1847
							0.9738	NaN	NaN
							0.9839	0.1463	5.2878
							0.9859	0.3114	2.3079

## Sheet: 3f
	F-actin intensity behind rim
	DMSO	CK666	Blebbistatin	SMIFH2
	315.811	408.738	1915.19	80.5159
	1444.51	1013.62	375.614	135.785
	1164.3	1074.97	1797	232.465
	1338.37	3257.94	2049.52	3130.37
	4542.36	198.992	679.624	886.236
	2519.17	2302.58	1512.72	838.362
	1626.79	1044.52	658.352	493.13
	384.166	440.095	1399.73	2821.48
	704.893	401.689	176.526	730.483
	566.471	841.79	4949.81	423.537
	130.424	671.695	4906	612.623
	1693.15	1475.94	2408.59	2260.04
	493.999	144.598	2367.15	514.778
	492.302	659.346	2008.09	2240.85
	222.215	419.06	3708.1	171.134
	1352.41	2181.78	328.825	228.262
	114.897	178.538	480.162	1432.11
	1123.18	340.866	2343.13	326.802
	970.981	477.564	736.828	543.891
	429.886	1011.84	2112.59	132.494
	588.471	740.426	465.954	603.469
	2240.31	2340.91	446.902	360.148
	876.128	601.167	1419.31	3902.5
	720.068	2551.01	2277.31	2053.68
	278.302	1144.81	194.654	266.657
	234.883	173.783	5039.54	445.949
	456.049	2823.84	290.242	469.519
	902.829	1892.33	909.397	472.283
	216.229	2789.17	463.855	83.0614
	2960.51	986.149	393.248	1897.73
	312.471	298.801	1540.2	206.933
	428.121	170.063	1906.87	560.116
	900.32	396.382	577.83	695.034
	814.422	583.059	672.745	1201.96
	1379.58	833.399	1071.58	478.532
	362.5	746.274	1516.26	242.927
	257.646	519.192	697.485	1738.2
	598.04	3336.72	282.66	186.851
	1014.88	286.195	2986.69	310.518
	360.994	1494.09	2422.28	169.814
	834.78	268.619	1812.21	278.829
	1627.31	430.156	202.7	1078.22
	806.457	253.92	2597.4	157.632
	161.949	1112.81	335.048	1160.16
	931.198	1554.39	4842.48	587.526
	968.016	2936.03	827.627
	735.714	842.554	380.114
	593.375	802.457	276.162
	3356.93	911.61	1180.28
	563.02	187.331	429.228
	1149.02	1408.42	854.411
	599.333	608.813	1848.95
	140.48	525.383	1320.65
	548.231	2163.01	117.875
	634.824	2765.01	1515.22
	1494.24	415.734	1367.74
	1256.57	870.539	259.421
	868.222	723.547	362.511
	1449.32	1789.41	1389.96
	1236.69	349.176	2200.27
	708.063		1185.81
	1593.69		1277.1
	517.731		835.874
			470.613
			2745.66
			3727.06
			651.423
			847.085
			325.643

## Sheet: 3g
		Experiment 1
		Adherent	Internalized	Total	Phagocytic index	Relative phagocytosis			Phagocytic index = internalized particles/total particles
	DMSO	125	49	174	0.281609	1			Relative phagocytosis = phagocytic index drug/phagocytic index DMSO
	CK666	89	1	90	0.0111111	0.0394558
	Bleb	137	47	184	0.255435	0.907054
	SMIFH2	65	16	81	0.197531	0.701436
		Experiment 2
		Adherent	Internalized	Total	Phagocytic index	Relative phagocytosis
	DMSO	149	47	196	0.239796	1
	CK666	112	3	115	0.026087	0.108788
	Bleb	102	21	123	0.170732	0.711988
	SMIFH2	485	109	594	0.183502	0.765241
		Experiment 3
		Adherent	Internalized	Total	Phagocytic index	Relative phagocytosis
	DMSO	131	16	147	0.108844	1
	CK666	81	1	82	0.0121951	0.112043
	Bleb	128	22	150	0.146667	1.3475
	SMIFH2	275	12	287	0.0418118	0.384146

## Sheet: 3h
DMSO		CK666		Blebbistatin		SMIFH2
Fraction engulfed	Cumulative fraction of particles	Fraction engulfed	Cumulative fraction of particles	Fraction engulfed	Cumulative fraction of particles	Fraction engulfed	Cumulative fraction of particles
0.0813	0	0.1776	0	0.2403	0	0.2129	0
0.1542	0.0149	0.2402	0.0161	0.2786	0.0139	0.2188	0.0185
0.2245	0.0299	0.272	0.0323	0.3123	0.0278	0.2208	0.037
0.2477	0.0448	0.2912	0.0484	0.3296	0.0417	0.2222	0.0556
0.2551	0.0597	0.3219	0.0645	0.3401	0.0556	0.2253	0.0741
0.2626	0.0746	0.3291	0.0806	0.3592	0.0694	0.2408	0.0926
0.2688	0.0896	0.3416	0.0968	0.412	0.0833	0.2571	0.1111
0.2743	0.1045	0.3458	0.1129	0.4536	0.0972	0.2707	0.1296
0.2782	0.1194	0.3553	0.129	0.4587	0.1111	0.3117	0.1481
0.2798	0.1343	0.3637	0.1452	0.4637	0.125	0.3176	0.1667
0.3099	0.1493	0.3655	0.1613	0.4908	0.1389	0.3225	0.1852
0.3149	0.1642	0.3869	0.1774	0.4917	0.1528	0.3292	0.2037
0.3658	0.1791	0.388	0.1935	0.5	0.1667	0.3314	0.2222
0.3858	0.194	0.4226	0.2097	0.5034	0.1806	0.3648	0.2407
0.4418	0.209	0.4398	0.2258	0.5122	0.1944	0.3864	0.2593
0.4601	0.2239	0.4405	0.2419	0.5139	0.2083	0.3981	0.2778
0.4948	0.2388	0.4729	0.2581	0.516	0.2222	0.4122	0.2963
0.5042	0.2537	0.4827	0.2742	0.5201	0.2361	0.4778	0.3148
0.5096	0.2687	0.4916	0.2903	0.5376	0.25	0.4837	0.3333
0.5213	0.2836	0.5018	0.3065	0.5922	0.2639	0.4867	0.3519
0.5269	0.2985	0.5293	0.3226	0.5954	0.2778	0.4965	0.3704
0.536	0.3134	0.537	0.3387	0.5991	0.2917	0.5119	0.3889
0.545	0.3284	0.5417	0.3548	0.6066	0.3056	0.5239	0.4074
0.5456	0.3433	0.5561	0.371	0.6113	0.3194	0.5574	0.4259
0.546	0.3582	0.5641	0.3871	0.6114	0.3333	0.5634	0.4444
0.5512	0.3731	0.5687	0.4032	0.6292	0.3472	0.5668	0.463
0.552	0.3881	0.5717	0.4194	0.6318	0.3611	0.5729	0.4815
0.5584	0.403	0.575	0.4355	0.6432	0.375	0.6002	0.5
0.5666	0.4179	0.5786	0.4516	0.6859	0.3889	0.6133	0.5185
0.5787	0.4328	0.5861	0.4677	0.6879	0.4028	0.6343	0.537
0.5854	0.4478	0.5872	0.4839	0.6887	0.4167	0.6487	0.5556
0.5854	0.4627	0.5889	0.5	0.6909	0.4306	0.6554	0.5741
0.5888	0.4776	0.6046	0.5161	0.7012	0.4444	0.6565	0.5926
0.6506	0.4925	0.6056	0.5323	0.7035	0.4583	0.6584	0.6111
0.6522	0.5075	0.6086	0.5484	0.7171	0.4722	0.6776	0.6296
0.6523	0.5224	0.6387	0.5645	0.7242	0.4861	0.7169	0.6481
0.6669	0.5373	0.6631	0.5806	0.7295	0.5	0.7307	0.6667
0.6783	0.5522	0.6744	0.5968	0.7314	0.5139	0.7308	0.6852
0.6851	0.5672	0.6757	0.6129	0.7357	0.5278	0.7498	0.7037
0.6868	0.5821	0.692	0.629	0.7371	0.5417	0.7764	0.7222
0.7059	0.597	0.7016	0.6452	0.7515	0.5556	0.7784	0.7407
0.7081	0.6119	0.7289	0.6613	0.7598	0.5694	0.7849	0.7593
0.7096	0.6269	0.7289	0.6774	0.784	0.5833	0.8083	0.7778
0.7172	0.6418	0.7355	0.6935	0.8008	0.5972	0.8119	0.7963
0.7253	0.6567	0.7423	0.7097	0.8024	0.6111	0.8349	0.8148
0.7359	0.6716	0.7757	0.7258	0.8089	0.625	0.8469	0.8333
0.7431	0.6866	0.795	0.7419	0.8142	0.6389	0.8559	0.8519
0.7479	0.7015	0.8065	0.7581	0.8175	0.6528	0.8675	0.8704
0.7715	0.7164	0.8129	0.7742	0.8626	0.6667	0.868	0.8889
0.7813	0.7313	0.8129	0.7903	0.8707	0.6806	0.8753	0.9074
0.7841	0.7463	0.8312	0.8065	0.8722	0.6944	0.8955	0.9259
0.7842	0.7612	0.8438	0.8226	0.8787	0.7083	0.9158	0.9444
0.7926	0.7761	0.8634	0.8387	0.8847	0.7222	0.923	0.963
0.8035	0.791	0.8836	0.8548	0.9065	0.7361	0.9762	0.9815
0.8094	0.806	0.8838	0.871	0.9102	0.75	0.98	1
0.8153	0.8209	0.8853	0.8871	0.9102	0.7639
0.8164	0.8358	0.8867	0.9032	0.9163	0.7778
0.8203	0.8507	0.9254	0.9194	0.9166	0.7917
0.8216	0.8657	0.9406	0.9355	0.9171	0.8056
0.8221	0.8806	0.9456	0.9516	0.9285	0.8194
0.8327	0.8955	0.9661	0.9677	0.9432	0.8333
0.8453	0.9104	0.9699	0.9839	0.9585	0.8472
0.8639	0.9254	0.9732	1	0.9621	0.8611
0.8725	0.9403			0.9643	0.875
0.893	0.9552			0.9651	0.8889
0.9001	0.9701			0.9678	0.9028
0.9809	0.9851			0.9685	0.9167
0.9936	1			0.9699	0.9306
				0.9709	0.9444
				0.9737	0.9583
				0.9738	0.9722
				0.9839	0.9861
				0.9859	1

## Sheet: 3i
DMSO		CK666		Blebbistatin		SMIFH2
Fraction engulfed	Sphericity	Fraction engulfed	Sphericity	Fraction engulfed	Sphericity	Fraction engulfed	Sphericity
0.0813	0.9982	0.1776	0.9991	0.2403	0.9988	0.2129	0.9982
0.1542	0.9979	0.2402	0.9985	0.2786	0.998	0.2188	0.9987
0.2245	0.9964	0.272	0.998	0.3123	0.9983	0.2208	0.9991
0.2477	0.998	0.2912	0.9988	0.3296	0.9966	0.2222	0.9972
0.2551	0.9953	0.3219	0.9985	0.3401	0.9974	0.2253	0.9978
0.2626	0.996	0.3291	0.9972	0.3592	0.9968	0.2408	0.9979
0.2688	0.9973	0.3416	0.9985	0.412	0.9989	0.2571	0.9964
0.2743	0.9977	0.3458	0.9992	0.4536	0.998	0.2707	0.9984
0.2782	0.9962	0.3553	0.9988	0.4587	0.9972	0.3117	0.9975
0.2798	0.999	0.3637	0.998	0.4637	0.9973	0.3176	0.9963
0.3099	0.9966	0.3655	0.9983	0.4908	0.9986	0.3225	0.9977
0.3149	0.9981	0.3869	0.9987	0.4917	0.9987	0.3292	0.9987
0.3658	0.9984	0.388	0.999	0.5	0.9941	0.3314	0.9983
0.3858	0.9964	0.4226	0.9991	0.5034	0.9989	0.3648	0.9975
0.4418	0.998	0.4398	0.9974	0.5122	0.9971	0.3864	0.9975
0.4601	0.9964	0.4405	0.9987	0.5139	0.9988	0.3981	0.9986
0.4948	0.9944	0.4729	0.9984	0.516	0.9971	0.4122	0.9193
0.5042	0.9968	0.4827	0.9988	0.5201	0.9985	0.4778	0.9969
0.5096	0.9971	0.4916	0.999	0.5376	0.9986	0.4837	0.9987
0.5213	0.9924	0.5018	0.9989	0.5922	0.9985	0.4867	0.9987
0.5269	0.9958	0.5293	0.9991	0.5954	0.9988	0.4965	0.998
0.536	0.9887	0.537	0.9988	0.5991	0.9977	0.5119	0.998
0.545	0.9935	0.5417	0.9986	0.6066	0.9977	0.5239	0.9984
0.5456	0.9961	0.5561	0.9986	0.6113	0.9965	0.5574	0.9961
0.546	0.9972	0.5641	0.9989	0.6114	0.9984	0.5634	0.999
0.5512	0.9971	0.5687	0.9986	0.6292	0.9963	0.5668	0.9987
0.552	0.9964	0.5717	0.9985	0.6318	0.9944	0.5729	0.9861
0.5584	0.9983	0.575	0.9987	0.6432	0.9987	0.6002	0.996
0.5666	0.9946	0.5786	0.9981	0.6859	0.9961	0.6133	0.9551
0.5787	0.9946	0.5861	0.9976	0.6879	0.9965	0.6343	0.9978
0.5854	0.9956	0.5872	0.9989	0.6887	0.9972	0.6487	0.9982
0.5854	0.9895	0.5889	0.9984	0.6909	0.9888	0.6554	0.9875
0.5888	0.9952	0.6046	0.9976	0.7012	0.9987	0.6565	0.9989
0.6506	0.9962	0.6056	0.9991	0.7035	0.9851	0.6584	0.9947
0.6522	0.9936	0.6086	0.9988	0.7171	0.999	0.6776	0.9977
0.6523	0.9877	0.6387	0.9973	0.7242	0.9837	0.7169	0.9977
0.6669	0.9943	0.6631	0.9985	0.7295	0.9963	0.7307	0.9935
0.6783	0.9975	0.6744	0.9988	0.7314	0.9963	0.7308	0.9898
0.6851	0.9924	0.6757	0.9982	0.7357	0.9964	0.7498	0.9978
0.6868	0.9967	0.692	0.9968	0.7371	0.9951	0.7764	0.9974
0.7059	0.9973	0.7016	0.9987	0.7515	0.998	0.7784	0.9873
0.7081	0.9921	0.7289	0.9979	0.7598	0.9969	0.7849	0.9966
0.7096	0.9955	0.7289	0.9984	0.784	0.998	0.8083	0.9847
0.7172	0.9953	0.7355	0.9953	0.8008	0.9977	0.8119	0.9856
0.7253	0.9948	0.7423	0.9981	0.8024	0.9972	0.8349	0.9935
0.7359	0.9974	0.7757	0.9986	0.8089	0.9983	0.8469	0.9944
0.7431	0.9925	0.795	0.9984	0.8142	0.9956	0.8559	0.9985
0.7479	0.9951	0.8065	0.9984	0.8175	0.9981	0.8675	0.9874
0.7715	0.9962	0.8129	0.9985	0.8626	0.9888	0.868	0.9906
0.7813	0.9955	0.8129	0.9986	0.8707	0.9972	0.8753	0.9817
0.7841	0.9975	0.8312	0.9971	0.8722	0.9958	0.8955	0.9789
0.7842	0.9907	0.8438	0.9979	0.8787	0.995	0.9158	0.9971
0.7926	0.9958	0.8634	0.9985	0.8847	0.9965	0.923	0.9843
0.8035	0.9891	0.8836	0.9978	0.9065	0.9975	0.9762	0.9861
0.8094	0.9902	0.8838	0.9953	0.9102	0.9906	0.98	0.9917
0.8153	0.9878	0.8853	0.9959	0.9102	0.9973
0.8164	0.9942	0.8867	0.9971	0.9163	0.9962
0.8203	0.9934	0.9254	0.9981	0.9166	0.9958
0.8216	0.9951	0.9406	0.9946	0.9171	0.9974
0.8221	0.9869	0.9456	0.9978	0.9285	0.995
0.8327	0.9736	0.9661	0.9967	0.9432	0.9977
0.8453	0.9912	0.9699	0.9977	0.9585	0.9988
0.8639	0.9907	0.9732	0.9967	0.9621	0.997
0.8725	0.9885			0.9643	0.9937
0.893	0.9953			0.9651	0.997
0.9001	0.9933			0.9678	0.997
0.9809	0.9946			0.9685	0.9958
0.9936	0.9942			0.9699	0.9907
				0.9709	0.999
				0.9737	0.9938
				0.9738	0.9964
				0.9839	0.9943
				0.9859	0.9939

## Sheet: 3j
DMSO			CK666			Blebbistatin			SMIFH2
Fraction engulfed	Constriction localization	Constriction magnitude	Fraction engulfed	Constriction localization	Constriction magnitude	Fraction engulfed	Constriction localization	Constriction magnitude	Fraction engulfed	Constriction localization	Constriction magnitude
	normalized to phagocytic axis length (L)	(mm)		normalized to phagocytic axis length (L)	(mm)		normalized to phagocytic axis length (L)	(mm)		normalized to phagocytic axis length (L)	(mm)
* NaN indicates that no constriction/F-actin peak was detectable
0.0813	NaN	NaN	0.1776	NaN	NaN	0.2403	0.2034	0.0139	0.2129	NaN	NaN
0.1542	0.0331	0.1192	0.2402	NaN	NaN	0.2786	NaN	NaN	0.2188	0.0672	0.032
0.2245	0.167	0.0748	0.272	NaN	NaN	0.3123	NaN	NaN	0.2208	0.0668	0.0408
0.2477	0.101	0.0367	0.2912	NaN	NaN	0.3296	0.2379	0.1486	0.2222	NaN	NaN
0.2551	0.232	0.1296	0.3219	0.4348	0.0215	0.3401	0.2367	0.0311	0.2253	0.1344	0.0789
0.2626	0.1344	0.1236	0.3291	0.4391	0.0341	0.3592	0.067	0.0426	0.2408	0.1	0.0442
0.2688	0.0679	0.0288	0.3416	0.1011	0.0187	0.412	0.101	0.0202	0.2571	0.033	0.0741
0.2743	0.1321	0.1085	0.3458	NaN	NaN	0.4536	0.1016	0.0328	0.2707	0.1014	0.0336
0.2782	0.1371	0.0427	0.3553	0.0668	0.0364	0.4587	0.3044	0.0622	0.3117	0.2041	0.0543
0.2798	0.0672	0.0098	0.3637	0.1021	0.0207	0.4637	0.2063	0.0482	0.3176	0.3112	0.0134
0.3099	0.2028	0.1026	0.3655	NaN	NaN	0.4908	0.0329	0.0353	0.3225	NaN	NaN
0.3149	0.1707	0.0578	0.3869	0.1002	0.0246	0.4917	0.0332	0.0581	0.3292	NaN	NaN
0.3658	0.199	0.041	0.388	0.2687	0.0071	0.5	NaN	NaN	0.3314	0.4678	0.0136
0.3858	0.2335	0.0772	0.4226	0.4402	0.0085	0.5034	NaN	NaN	0.3648	NaN	NaN
0.4418	0.1672	0.0578	0.4398	0.3039	0.0574	0.5122	0.1339	0.0391	0.3864	0.1658	0.0758
0.4601	0.3836	0.0582	0.4405	0.1682	0.0447	0.5139	0.479	0.0539	0.3981	0.0335	0.0297
0.4948	0.3792	0.2055	0.4729	0.0996	0.0526	0.516	0.3726	0.0831	0.4122	NaN	NaN
0.5042	0.2711	0.1279	0.4827	0.2373	0.0299	0.5201	0.2375	0.0294	0.4778	0.3441	0.1368
0.5096	0.304	0.0794	0.4916	NaN	NaN	0.5376	0.3324	0.0434	0.4837	0.1357	0.0324
0.5213	0.3114	0.2231	0.5018	NaN	NaN	0.5922	0.4017	0.0502	0.4867	0.2336	0.0265
0.5269	0.3815	0.1986	0.5293	0.3369	0.0091	0.5954	0.1345	0.0169	0.4965	0.2981	0.0513
0.536	0.3521	0.3246	0.537	0.1333	0.0126	0.5991	0.3369	0.0644	0.5119	0.3084	0.0736
0.545	0.3488	0.2017	0.5417	0.4677	0.0108	0.6066	NaN	NaN	0.5239	0.2358	0.0263
0.5456	0.3167	0.1456	0.5561	0.3032	0.0281	0.6113	0.5001	0.0717	0.5574	0.3341	0.1428
0.546	0.4027	0.0724	0.5641	0.2688	0.03	0.6114	0.0666	0.0438	0.5634	0.2677	0.0138
0.5512	0.2721	0.0796	0.5687	0.4063	0.0386	0.6292	0.7058	0.055	0.5668	0.0329	0.0677
0.552	0.3792	0.1266	0.5717	0.0333	0.0319	0.6318	0.0997	0.062	0.5729	0.4008	0.3357
0.5584	NaN	NaN	0.575	0.3012	0.0224	0.6432	0.3343	0.0353	0.6002	0.3707	0.063
0.5666	0.4174	0.2568	0.5786	0.3395	0.0761	0.6859	0.0335	0.0798	0.6133	0.5617	0.8133
0.5787	NaN	NaN	0.5861	0.6129	0.0299	0.6879	0.4795	0.0481	0.6343	0.1682	0.0301
0.5854	0.419	0.1853	0.5872	0.5366	0.0284	0.6887	0.4341	0.0327	0.6487	0.3068	0.0569
0.5854	0.4229	0.3264	0.5889	NaN	NaN	0.6909	0.5049	0.3577	0.6554	0.7956	0.2386
0.5888	0.3002	0.0966	0.6046	0.1343	0.0513	0.7012	0.5009	0.0184	0.6565	0.4351	0.011
0.6506	0.4731	0.1282	0.6056	NaN	NaN	0.7035	0.5386	0.3689	0.6584	0.2801	0.1173
0.6522	0.1648	0.1068	0.6086	NaN	NaN	0.7171	0.4743	0.0373	0.6776	0.8046	0.0286
0.6523	0.4673	0.3977	0.6387	0.066	0.0325	0.7242	0.5669	0.2881	0.7169	NaN	NaN
0.6669	0.3128	0.1213	0.6631	0.4432	0.0374	0.7295	0.0332	0.1245	0.7307	0.4886	0.1887
0.6783	0.4096	0.126	0.6744	NaN	NaN	0.7314	0.4581	0.0895	0.7308	0.5342	0.3326
0.6851	0.5228	0.2048	0.6757	0.0668	0.0209	0.7357	0.7157	0.0966	0.7498	0.5412	0.037
0.6868	0.4688	0.1215	0.692	0.3759	0.0382	0.7371	0.3447	0.0916	0.7764	0.6747	0.0608
0.7059	0.4091	0.0861	0.7016	0.2348	0.0162	0.7515	0.4771	0.0954	0.7784	0.594	0.3637
0.7081	0.4695	0.2446	0.7289	0.4437	0.0569	0.7598	0.5282	0.1166	0.7849	0.5578	0.1295
0.7096	0.4758	0.1413	0.7289	NaN	NaN	0.784	0.5773	0.0422	0.8083	0.6316	0.5046
0.7172	0.5221	0.2235	0.7355	0.4824	0.1301	0.8008	0.582	0.0726	0.8119	0.5963	0.1754
0.7253	0.4913	0.2271	0.7423	0.4381	0.0939	0.8024	0.3274	0.0341	0.8349	0.5322	0.1501
0.7359	0.7705	0.0269	0.7757	0.4125	0.0546	0.8089	0.5865	0.0841	0.8469	0.593	0.2024
0.7431	0.5658	0.2811	0.795	0.6002	0.0322	0.8142	0.5891	0.0684	0.8559	NaN	NaN
0.7479	0.3956	0.1089	0.8065	0.1677	0.0219	0.8175	0.4106	0.0536	0.8675	0.5565	0.3465
0.7715	0.5834	0.1422	0.8129	0.3389	0.0272	0.8626	0.6275	0.2793	0.868	0.6685	0.2741
0.7813	0.4596	0.1903	0.8129	0.5018	0.0568	0.8707	0.6121	0.1313	0.8753	0.6974	0.4209
0.7841	0.6795	0.108	0.8312	0.3741	0.0523	0.8722	0.4989	0.072	0.8955	0.689	0.4144
0.7842	0.5494	0.2368	0.8438	0.4887	0.1063	0.8787	0.7232	0.0909	0.9158	0.6652	0.0895
0.7926	0.4592	0.1773	0.8634	0.6512	0.0544	0.8847	0.5747	0.1197	0.923	0.6576	0.2901
0.8035	0.5841	0.3164	0.8836	NaN	NaN	0.9065	0.6223	0.1026	0.9762	0.359	0.1201
0.8094	0.5692	0.3291	0.8838	0.7016	0.1941	0.9102	0.6274	0.1534	0.98	0.8402	0.1969
0.8153	0.6324	0.2629	0.8853	NaN	NaN	0.9102	0.4935	0.071
0.8164	0.5984	0.1388	0.8867	0.5654	0.1154	0.9163	0.5063	0.1044
0.8203	0.5945	0.2843	0.9254	0.4468	0.0478	0.9166	0.6847	0.0736
0.8216	0.6261	0.2281	0.9406	0.5665	0.1639	0.9171	0.0667	0.0271
0.8221	0.5697	0.2092	0.9456	0.6599	0.0884	0.9285	0.7551	0.1527
0.8327	0.6677	0.5534	0.9661	NaN	NaN	0.9432	0.5979	0.0742
0.8453	0.6698	0.2935	0.9699	0.7504	0.0424	0.9585	0.9399	0.0172
0.8639	0.7277	0.2041	0.9732	NaN	NaN	0.9621	0.7327	0.0211
0.8725	0.7703	0.1894				0.9643	0.8086	0.08
0.893	0.682	0.1258				0.9651	0.3376	0.0697
0.9001	0.6978	0.2392				0.9678	0.5247	0.1054
0.9809	0.9247	0.0911				0.9685	0.8202	0.0746
0.9936	0.9043	0.3081				0.9699	0.7569	0.0492
						0.9709	0.9314	0.0085
						0.9737	0.6608	0.1928
						0.9738	0.7587	0.0704
						0.9839	0.6473	0.0926
						0.9859	0.7105	0.1753

## Sheet: 3 - S1a
Rows indicated individual vertices
bin index	Bin location/L	Fluorescence Intensity	Radial coordinate	mean curvature deviation
		(arbitrary units)	(mm)	(mm^-1)
1	0	158.676	4.14425	0.00976744
1	0	230.35	4.12026	-0.00279664
1	0	100.218	4.13829	0.0232599
1	0	127.546	4.12854	-3.66782e-05
1	0	198.546	4.12458	0.0134967
1	0	203.54	4.13577	0.00734836
1	0	103.762	4.10752	-0.0131233
1	0	282.316	4.12277	-0.000647149
1	0	71.7013	4.13145	0.0079225
1	0	97.7058	4.12128	-0.0101482
1	0	95.6311	4.10969	-0.0120718
1	0	241.434	4.1354	-0.0174086
1	0	65.0191	4.11236	-0.000807616
1	0	77.2302	4.09617	-0.0253248
1	0	221.004	4.11733	-0.00753052
1	0	106.298	4.12035	-0.00492765
1	0	99.2931	4.12534	-0.0258704
1	0	94.7899	4.07285	-0.0399162
1	0	88.6041	4.12188	-0.0144808
1	0	107.327	4.09286	-0.0337904
1	0	202.022	4.12882	-0.0204467
1	0	105.555	4.11622	-0.00198598
1	0	108.227	4.1342	-0.0313765
1	0	58.8034	4.09538	-0.0442565
1	0	92.0953	4.04911	-0.0887539
1	0	123.892	4.11212	0.00960261
1	0	119.079	4.10307	-0.0337286
1	0	112.939	4.11721	-0.0325891
1	0	74.5874	4.09148	-0.0210256
1	0	109.63	4.13221	0.000363351
1	0	85.1662	4.08373	-0.062939
1	0	83.653	4.05309	-0.0799888
1	0	118.091	4.1073	0.000690208
1	0	106.36	4.10523	-0.0287094
1	0	106.964	4.13744	-0.0497606
1	0	62.3919	4.09018	-0.0575937
1	0	43.4097	4.07538	-0.05029
1	0	100.92	4.10749	0.0237365
1	0	93.3233	4.08979	-0.0611821
1	0	62.3359	4.07274	-0.0402579
1	0	77.0084	4.09357	-0.053742
1	0	101.628	4.09614	-0.0179505
1	0	82.6923	4.13373	0.00348528
1	0	60.8892	4.07962	-0.0780309
1	0	26.7409	4.08094	-0.0302587
1	0	88.3082	4.09122	-0.0364129
1	0	94.5229	4.09218	-0.0335799
1	0	58.7893	4.12907	-0.0376473
1	0	62.0413	4.08443	-0.013838
1	0	90.3347	4.07993	-0.0851253
1	0	26.3427	4.0914	-0.003355
1	0	109.354	4.10255	-0.000877857
1	0	37.7546	4.08104	-0.0771337
1	0	86.0333	4.10844	-0.054914
1	0	28.8848	4.09589	-0.00582965
1	0	89.7627	4.08143	-0.102142
1	0	91.9131	4.09092	-0.0059981
1	0	73.4838	4.11846	0.000485856
1	0	80.7537	4.08341	-0.000311215
1	0	63.9819	4.07621	-0.103542
1	0	51.4016	4.1201	-0.0468361
1	0	15.2433	4.09546	0.0141048
1	0	85.4266	4.08225	-0.0665763
1	0	109.27	4.07503	-0.0197455
1	0	42.9714	4.07947	-0.0481551
1	0	67.1827	4.11606	-0.00254699
1	0	42.1068	4.10017	0.00539349
1	0	101.133	4.07518	-0.12927
1	0	59.1223	4.09341	0.0104528
1	0	78.7318	4.09308	-0.0279641
1	0	80.3574	4.0828	0.00585638
1	0	36.7772	4.07139	-0.0988336
1	0	48.5167	4.12779	0.0108757
1	0	20.774	4.09935	0.0164271
1	0	66.7256	4.07363	-0.134167
1	0	87.5887	4.093	-0.00782516
1	0	56.6721	4.08248	-0.0171904
1	0	50.6247	4.10976	0.0107877
1	0	56.8371	4.09295	0.0187139
1	0	85.4351	4.07106	-0.13438
1	0	55.2139	4.15036	0.0438564
1	0	55.1364	4.0979	0.0232573
1	0	69.7327	4.08099	-0.0963747
1	0	57.3322	4.0931	0.0177866
1	0	41.535	4.07025	-0.0547083
1	0	55.5859	4.13725	0.0567717
1	0	19.7967	4.09457	0.0260955
1	0	50.3067	4.06968	-0.160632
1	0	36.0931	4.11073	0.0368872
1	0	48.287	4.15868	0.0651497
1	0	80.8531	4.09338	0.000853884
1	0	43.6381	4.10981	-0.0490244
1	0	78.5067	4.0897	0.0210125
1	0	66.6484	4.07027	-0.100275
1	0	31.408	4.16676	0.100169
1	0	15.5784	4.09883	0.0235116
1	0	22.2088	4.07492	-0.112347
1	0	27.4542	4.10789	0.0295259
1	0	44.4955	4.15185	0.0492967
1	0	62.3893	4.08632	-0.0306524
1	0	45.6969	4.15195	0.0395724
1	0	37.3516	4.08873	0.0132512
1	0	38.5898	4.07508	-0.09796
1	0	-20.8221	4.12248	0.0553499
1	0	12.8152	4.175	0.125308
1	0	52.1213	4.10372	0.00239457
1	0	39.7866	4.10668	-0.0261099
1	0	62.0611	4.09632	-0.00256555
1	0	55.3765	4.09195	-0.0520961
1	0	-8.96479	4.12218	0.0519327
1	0	37.866	4.18093	0.114848
1	0	-1.00097	4.09714	0.0102631
1	0	27.8898	4.08331	-0.0303809
1	0	6.47106	4.10991	0.0103009
1	0	-1.87438	4.16511	0.089758
1	0	68.0584	4.11056	-0.0096005
1	0	49.276	4.14964	0.0443725
1	0	54.003	4.09182	-0.0142631
1	0	48.4662	4.10259	-0.0283794
1	0	-9.07894	4.11722	0.010824
1	0	30.607	4.18182	0.122541
1	0	22.7235	4.1121	0.00940165
1	0	34.2268	4.11117	0.0236934
1	0	67.7394	4.09086	-0.0257047
1	0	17.6077	4.15002	0.0668428
1	0	27.639	4.11444	-0.00562126
1	0	90.047	4.16706	0.0913036
1	0	41.524	4.10001	0.00380878
1	0	46.3965	4.11651	0.0230679
1	0	38.4291	4.09207	-0.022146
1	0	56.1982	4.16326	0.104733
1	0	60.6106	4.12743	0.00881228
1	0	78.6126	4.13923	0.0719935
1	0	86.5611	4.08623	-0.0318171
1	0	25.3725	4.13687	0.0714603
1	0	57.5224	4.13374	0.0174436
1	0	56.166	4.0919	-0.0470187
1	0	105.345	4.15749	0.105208
1	0	86.54	4.11283	-0.00328413
1	0	51.7874	4.1299	0.0131917
1	0	77.7794	4.13233	0.0765554
1	0	69.0101	4.07828	-0.0574363
1	0	45.215	4.14661	0.0950139
1	0	70.6326	4.13237	0.0110269
1	0	40.4204	4.08801	-0.0641593
1	0	81.949	4.14328	0.0926877
1	0	97.6315	4.09647	-0.0478159
1	0	37.0304	4.14724	0.051768
1	0	77.9054	4.13301	0.0577583
1	0	30.4426	4.07927	-0.0754266
1	0	38.7433	4.14942	0.0534535
1	0	64.0107	4.11647	-0.0062885
1	0	71.5109	4.15426	0.00117439
1	0	23.7787	4.08381	-0.0563074
1	0	62.5835	4.13626	0.0239572
1	0	65.3068	4.11978	-0.00936506
1	0	44.7939	4.09848	-0.0523528
1	0	54.7067	4.15161	0.00898447
1	0	32.7448	4.10199	-0.0289894
1	0	57.2033	4.12519	-0.0166714
1	0	53.7723	4.12583	-0.0199482
2	0.0347842	156.053	4.16366	0.0316144
2	0.0347842	267.582	4.14445	0.00897076
2	0.0347842	96.4691	4.15165	0.0403053
2	0.0347842	174.032	4.15524	0.0104014
2	0.0347842	336.157	4.15858	0.0178621
2	0.0347842	173.824	4.15932	0.0500471
2	0.0347842	165.45	4.16258	0.0411109
2	0.0347842	321.805	4.14115	0.0164197
2	0.0347842	152.633	4.15466	0.0358044
2	0.0347842	156.911	4.1658	0.0741175
2	0.0347842	193.41	4.16016	0.0223824
2	0.0347842	361.146	4.15478	0.0240416
2	0.0347842	254.438	4.15433	0.0427043
2	0.0347842	142.684	4.16127	0.0342575
2	0.0347842	122.149	4.14627	0.0511855
2	0.0347842	294.841	4.15448	-0.00964855
2	0.0347842	294.213	4.13849	0.028333
2	0.0347842	243.043	4.15195	0.0410059
2	0.0347842	207.095	4.16714	0.0680412
2	0.0347842	203.248	4.16312	0.0173468
2	0.0347842	91.4358	4.11238	0.0112826
2	0.0347842	327.669	4.1472	0.018931
2	0.0347842	324.893	4.14294	0.0490146
2	0.0347842	135.595	4.15482	0.032232
2	0.0347842	125.828	4.14857	0.0434474
2	0.0347842	229.596	4.13439	-0.0306479
2	0.0347842	229.452	4.14073	0.00949706
2	0.0347842	89.2895	4.08977	-0.03301
2	0.0347842	259.096	4.13949	0.038951
2	0.0347842	211.044	4.15584	0.0574186
2	0.0347842	99.1854	4.11992	-0.039512
2	0.0347842	177.24	4.1577	0.00952061
2	0.0347842	85.0011	4.1067	-0.0215628
2	0.0347842	277.018	4.1354	-0.00682168
2	0.0347842	336.138	4.13027	0.0316293
2	0.0347842	76.3288	4.08209	-0.0550134
2	0.0347842	214.745	4.14315	0.0359531
2	0.0347842	150.174	4.14549	0.0363417
2	0.0347842	152.762	4.11794	-0.0407977
2	0.0347842	180.449	4.13786	-0.00602232
2	0.0347842	84.479	4.07347	-0.069354
2	0.0347842	268.302	4.12736	0.0206237
2	0.0347842	208.507	4.14028	0.0396427
2	0.0347842	97.3367	4.11974	-0.0549711
2	0.0347842	72.91	4.07755	-0.0401096
2	0.0347842	70.4781	4.09912	-0.029896
2	0.0347842	167.833	4.12263	-0.0353814
2	0.0347842	136.036	4.13784	-0.0309744
2	0.0347842	103.397	4.06287	-0.107396
2	0.0347842	260.586	4.1319	0.0219334
2	0.0347842	125.877	4.10933	-0.0449031
2	0.0347842	77.6967	4.05772	-0.0391819
2	0.0347842	82.4641	4.05693	-0.106464
2	0.0347842	210.546	4.11733	-0.00333667
2	0.0347842	140.274	4.11367	-0.0593307
2	0.0347842	86.8244	4.06105	-0.100198
2	0.0347842	61.7353	4.10111	-0.0134116
2	0.0347842	117.302	4.11328	-0.0415908
2	0.0347842	97.4604	4.04056	-0.0488182
2	0.0347842	134.818	4.12262	-0.0450136
2	0.0347842	97.6854	4.04065	-0.146904
2	0.0347842	161.25	4.10906	-0.0461416
2	0.0347842	74.1473	4.05638	-0.063233
2	0.0347842	208.579	4.14763	-0.0350617
2	0.0347842	84.6284	4.05565	-0.088657
2	0.0347842	109.562	4.11513	-0.0199336
2	0.0347842	126.124	4.09908	-0.0693148
2	0.0347842	101.643	4.04688	-0.142423
2	0.0347842	130.274	4.12021	-0.0277837
2	0.0347842	62.7949	4.0461	-0.0509749
2	0.0347842	165.338	4.09853	-0.0620108
2	0.0347842	77.8705	4.0338	-0.14417
2	0.0347842	132.845	4.04817	-0.0929729
2	0.0347842	140.156	4.11145	-0.0579793
2	0.0347842	82.5486	4.05507	-0.0975348
2	0.0347842	225.057	4.13293	-0.0583392
2	0.0347842	83.9389	4.04609	-0.0771425
2	0.0347842	79.3753	4.07837	-0.0922791
2	0.0347842	95.6292	4.03863	-0.131118
2	0.0347842	205.077	4.14737	-0.0306163
2	0.0347842	82.4984	4.05554	-0.0569529
2	0.0347842	158.355	4.08674	-0.0976764
2	0.0347842	104.087	4.04947	-0.0818438
2	0.0347842	92.0097	4.10368	-0.0885855
2	0.0347842	80.3726	4.05619	-0.0822293
2	0.0347842	69.285	4.06215	-0.00546616
2	0.0347842	209.093	4.12321	-0.082792
2	0.0347842	94.2526	4.05435	-0.0540366
2	0.0347842	78.925	4.07065	-0.124877
2	0.0347842	117.504	4.05053	-0.0422319
2	0.0347842	213.321	4.12695	-0.0463564
2	0.0347842	81.9	4.06599	-0.0404062
2	0.0347842	68.0971	4.07807	0.0283794
2	0.0347842	126.593	4.09429	-0.130672
2	0.0347842	104.451	4.05438	-0.0487788
2	0.0347842	65.2291	4.09889	-0.0900754
2	0.0347842	133.484	4.05766	-0.002397
2	0.0347842	144.107	4.11566	-0.100193
2	0.0347842	107.713	4.06519	-0.0224867
2	0.0347842	75.6143	4.08686	0.0349079
2	0.0347842	96.5452	4.08912	-0.103621
2	0.0347842	98.5494	4.05857	-0.0277793
2	0.0347842	157.061	4.11385	-0.0760118
2	0.0347842	115.979	4.07458	0.0105876
2	0.0347842	75.7174	4.11216	-0.103221
2	0.0347842	111.602	4.06513	-0.0228606
2	0.0347842	167.132	4.12545	-0.0778373
2	0.0347842	82.76	4.09002	0.00346207
2	0.0347842	112.006	4.07291	-0.0223113
2	0.0347842	72.8276	4.11777	-0.0777354
2	0.0347842	154.897	4.12189	-0.0667177
2	0.0347842	93.8891	4.08719	0.022922
2	0.0347842	113.269	4.12203	-0.0647013
2	0.0347842	95.0683	4.08322	-0.0277033
2	0.0347842	108.899	4.08979	-0.00207179
2	0.0347842	25.8267	4.13466	-0.0313091
2	0.0347842	148.126	4.1161	-0.0793379
2	0.0347842	71.2587	4.09482	0.0218963
2	0.0347842	55.3928	4.13736	-0.0146628
2	0.0347842	68.862	4.07722	-0.0307566
2	0.0347842	113.806	4.11069	-0.0775385
2	0.0347842	65.2736	4.10223	0.043281
2	0.0347842	104.235	4.13012	-0.0295277
2	0.0347842	39.6123	4.09455	0.0203522
2	0.0347842	65.6706	4.11958	-0.071831
2	0.0347842	38.6945	4.08369	-0.0355309
2	0.0347842	95.9944	4.12626	-0.0547153
2	0.0347842	-0.0463329	4.11472	0.0630824
2	0.0347842	68.8499	4.13685	-0.0569213
2	0.0347842	104.915	4.0901	-0.020406
2	0.0347842	6.97519	4.1017	0.030735
2	0.0347842	72.8982	4.12671	-0.0598635
2	0.0347842	153.434	4.10723	0.0595418
2	0.0347842	67.4996	4.13912	-0.0425863
2	0.0347842	47.9453	4.0964	0.00617325
2	0.0347842	13.6737	4.14323	0.0137932
2	0.0347842	100.578	4.13453	0.108022
2	0.0347842	67.8213	4.13054	-0.0580973
2	0.0347842	109.93	4.10762	0.0201596
2	0.0347842	87.1655	4.1503	0.0920785
2	0.0347842	42.9632	4.1187	-0.0431469
2	0.0347842	22.744	4.1123	0.0241491
2	0.0347842	23.1824	4.13608	-0.00305538
2	0.0347842	75.8803	4.13333	0.0461528
2	0.0347842	111.875	4.07884	-0.0972055
2	0.0347842	89.0858	4.1381	0.0378485
2	0.0347842	57.2997	4.12351	-0.058629
2	0.0347842	67.5811	4.11372	0.00918531
2	0.0347842	169.757	4.09109	-0.132951
2	0.0347842	65.4316	4.15053	0.0568222
2	0.0347842	83.8196	4.0942	-0.0650682
2	0.0347842	109.904	4.11309	-0.0485433
2	0.0347842	46.2965	4.12647	-0.0138219
2	0.0347842	41.8329	4.13034	-0.00459395
2	0.0347842	148.032	4.08167	-0.121883
2	0.0347842	52.0804	4.13733	0.0179459
2	0.0347842	51.9675	4.11377	-0.0525217
2	0.0347842	69.8399	4.11085	-0.0309103
2	0.0347842	111.027	4.10181	-0.101198
2	0.0347842	31.4181	4.13354	0.00241083
2	0.0347842	94.3258	4.0987	-0.0791164
2	0.0347842	51.5901	4.1085	-0.0323554
2	0.0347842	38.446	4.10867	-0.0470727
2	0.0347842	97.9337	4.09971	-0.0906266
2	0.0347842	6.35425	4.1054	0.00250528
2	0.0347842	96.1485	4.13029	-0.0359862
2	0.0347842	54.0373	4.09822	-0.0362228
2	0.0347842	12.1684	4.08973	-0.0308352
2	0.0347842	100.623	4.12608	-0.0473586
2	0.0347842	17.6058	4.0903	-0.00681165
3	0.0695684	56.8318	4.15329	0.00208129
3	0.0695684	138.166	4.14888	-0.00928814
3	0.0695684	133.113	4.16002	0.0338182
3	0.0695684	89.1749	4.14067	-0.0173097
3	0.0695684	348.62	4.1492	0.00134725
3	0.0695684	107.328	4.14467	0.028084
3	0.0695684	78.5163	4.16089	0.0196022
3	0.0695684	213.933	4.13643	-0.0265736
3	0.0695684	180.545	4.14094	-0.0122079
3	0.0695684	123.564	4.15379	0.0285464
3	0.0695684	108.965	4.1433	0.0522425
3	0.0695684	70.568	4.15276	-0.00713218
3	0.0695684	388.972	4.1481	-0.0100755
3	0.0695684	69.0968	4.14552	0.0220325
3	0.0695684	131.97	4.15979	0.0358008
3	0.0695684	101.838	4.14251	0.0355176
3	0.0695684	184.188	4.14242	-0.0103402
3	0.0695684	230.094	4.13952	-0.0108925
3	0.0695684	181.993	4.14981	0.0193242
3	0.0695684	116.74	4.14669	0.0573449
3	0.0695684	146.852	4.13009	0.0015832
3	0.0695684	91.4053	4.16258	0.0123179
3	0.0695684	104.795	4.12746	0.015047
3	0.0695684	319.922	4.15213	-0.00656232
3	0.0695684	162.443	4.14563	0.0166656
3	0.0695684	147.676	4.14141	-0.0278925
3	0.0695684	120.753	4.15414	0.043213
3	0.0695684	136.393	4.1468	0.0600563
3	0.0695684	201.783	4.14323	0.00713233
3	0.0695684	205.421	4.14755	-0.00453433
3	0.0695684	111.944	4.11169	0.0228479
3	0.0695684	271.675	4.15412	0.0133141
3	0.0695684	115.954	4.15405	0.0574398
3	0.0695684	130.384	4.13439	-0.0167968
3	0.0695684	184.408	4.13388	0.0371358
3	0.0695684	302.733	4.15663	0.00726014
3	0.0695684	170.608	4.14046	-0.0263752
3	0.0695684	245.082	4.10237	0.041887
3	0.0695684	140.953	4.1552	0.071831
3	0.0695684	222.423	4.14269	-0.00186942
3	0.0695684	86.6071	4.11383	0.0240025
3	0.0695684	108.602	4.13946	-0.0318717
3	0.0695684	121.049	4.10122	0.0517487
3	0.0695684	181.753	4.13835	0.0559969
3	0.0695684	297.221	4.15826	0.00911038
3	0.0695684	186.879	4.14104	-0.0190132
3	0.0695684	159.048	4.10148	0.0300987
3	0.0695684	209.555	4.14209	-0.0266745
3	0.0695684	73.9475	4.09022	0.0498212
3	0.0695684	595.094	4.16925	0.0527101
3	0.0695684	106.324	4.11239	0.0205235
3	0.0695684	83.6929	4.13338	-0.0336076
3	0.0695684	163.956	4.09897	0.0335869
3	0.0695684	71.3408	4.06579	0.00882402
3	0.0695684	257.331	4.15019	0.00918059
3	0.0695684	91.5706	4.09802	-0.00416366
3	0.0695684	152.664	4.12797	-0.0343121
3	0.0695684	70.3791	4.09088	0.0265563
3	0.0695684	426.567	4.17915	0.0615364
3	0.0695684	88.2056	4.14074	-0.0344513
3	0.0695684	133.226	4.09404	0.00445987
3	0.0695684	267.441	4.18011	0.0229541
3	0.0695684	84.8214	4.06407	0.00522011
3	0.0695684	311.144	4.15861	0.0231535
3	0.0695684	77.4895	4.08746	-0.000819676
3	0.0695684	266.387	4.18387	0.0365653
3	0.0695684	92.8146	4.04261	-0.0582219
3	0.0695684	93.8905	4.1418	-0.0325279
3	0.0695684	245.045	4.1693	0.0104903
3	0.0695684	82.8466	4.06255	-0.0121134
3	0.0695684	228.705	4.16765	0.0114156
3	0.0695684	121.811	4.03227	-0.092125
3	0.0695684	190.669	4.17942	0.00715088
3	0.0695684	93.7597	4.04098	-0.0447097
3	0.0695684	133.237	4.03223	-0.0617069
3	0.0695684	136.672	4.16732	0.0144786
3	0.0695684	183.655	4.16449	-0.00993098
3	0.0695684	138.767	4.03782	-0.0910424
3	0.0695684	112.358	4.16626	-0.0283654
3	0.0695684	118.632	4.05414	-0.00826705
3	0.0695684	170.806	4.17412	-0.000242099
3	0.0695684	139.033	4.0414	-0.0863352
3	0.0695684	102.397	4.16585	-0.00452527
3	0.0695684	85.4276	4.0848	0.035904
3	0.0695684	118.191	4.04202	-0.0816651
3	0.0695684	132.298	4.16067	-0.0210687
3	0.0695684	116.325	4.05642	-0.0343118
3	0.0695684	183.145	4.16458	-0.0182637
3	0.0695684	139.571	4.16355	0.0249057
3	0.0695684	70.2435	4.09612	0.0683328
3	0.0695684	164.344	4.1558	-0.0150801
3	0.0695684	66.2178	4.07828	0.00692522
3	0.0695684	182.971	4.15372	-0.00763439
3	0.0695684	108.253	4.087	0.0683602
3	0.0695684	94.4334	4.05231	-0.0545813
3	0.0695684	115.928	4.17345	0.0295849
3	0.0695684	47.785	4.09318	0.040096
3	0.0695684	213.642	4.14058	-0.0163828
3	0.0695684	123.992	4.0794	0.0442083
3	0.0695684	110.825	4.1802	0.0114075
3	0.0695684	153.534	4.15641	-0.00527168
3	0.0695684	71.8821	4.09335	0.0512189
3	0.0695684	110.411	4.08031	0.0146886
3	0.0695684	139.258	4.17724	-0.0139842
3	0.0695684	169.924	4.13123	-0.043942
3	0.0695684	78.3932	4.08827	0.0285347
3	0.0695684	84.4096	4.16164	-0.0129182
3	0.0695684	96.8959	4.07461	-0.02703
3	0.0695684	160.687	4.15222	-0.0487909
3	0.0695684	95.5204	4.14536	0.00215642
3	0.0695684	78.2028	4.08217	-0.0162121
3	0.0695684	122.389	4.14631	-0.0425483
3	0.0695684	172.618	4.16145	0.0289635
3	0.0695684	105.674	4.06285	-0.0541674
3	0.0695684	63.7517	4.1279	-0.0267808
3	0.0695684	43.3795	4.06682	-0.0749916
3	0.0695684	169.474	4.17704	0.0734454
3	0.0695684	104.81	4.06896	-0.048367
3	0.0695684	92.889	4.14016	-0.000393734
3	0.0695684	59.7057	4.06415	-0.0726178
3	0.0695684	158.606	4.17297	0.105376
3	0.0695684	74.1888	4.11176	-0.0492623
3	0.0695684	80.9276	4.09133	-0.0757614
3	0.0695684	140.328	4.16532	0.0263644
3	0.0695684	86.6897	4.06639	-0.0676243
3	0.0695684	89.5382	4.12557	0.00558968
3	0.0695684	46.914	4.15417	0.0773009
3	0.0695684	66.2123	4.12078	-0.0377704
3	0.0695684	82.6251	4.07763	-0.0771672
3	0.0695684	99.5971	4.14799	0.12307
3	0.0695684	95.0724	4.17215	0.0529905
3	0.0695684	149.584	4.11397	-0.00634839
3	0.0695684	20.0183	4.14297	0.026231
3	0.0695684	71.5791	4.15507	0.0997691
3	0.0695684	83.8347	4.14635	-0.019426
3	0.0695684	74.1434	4.07582	-0.0731993
3	0.0695684	47.303	4.11169	-0.0531279
3	0.0695684	105.723	4.13875	0.103558
3	0.0695684	38.8982	4.15296	0.0532821
3	0.0695684	94.9154	4.10925	0.00266204
3	0.0695684	166.258	4.09246	-0.0169835
3	0.0695684	48.2583	4.13701	-0.0332315
3	0.0695684	25.0567	4.15156	0.135005
3	0.0695684	78.9504	4.15718	0.00246204
3	0.0695684	82.6269	4.08098	-0.0605767
3	0.0695684	150.437	4.12227	0.0947292
3	0.0695684	36.1181	4.126	0.00574395
3	0.0695684	110.06	4.13486	0.0474582
3	0.0695684	61.4529	4.11131	-0.0908385
3	0.0695684	76.0094	4.14258	0.149671
3	0.0695684	42.1061	4.13749	0.000308485
3	0.0695684	86.9383	4.08726	-0.0357859
3	0.0695684	67.8513	4.10464	-0.0774266
3	0.0695684	81.9234	4.14674	0.0969729
3	0.0695684	137.423	4.08743	-0.106665
3	0.0695684	81.4797	4.1015	-0.0520022
3	0.0695684	118.761	4.11771	0.00720306
3	0.0695684	111.658	4.08994	-0.130231
3	0.0695684	133.144	4.09522	-0.0834098
4	0.104353	146.776	4.14628	0.0145644
4	0.104353	210.858	4.14157	-0.0070495
4	0.104353	292.786	4.1437	-0.0118489
4	0.104353	112.475	4.145	0.0202041
4	0.104353	217.091	4.14364	0.00614538
4	0.104353	162.384	4.14412	-0.00620924
4	0.104353	152.221	4.15449	0.0152539
4	0.104353	45.7483	4.14467	0.0283967
4	0.104353	162.8	4.14415	-0.00337175
4	0.104353	292.245	4.12999	-0.0390672
4	0.104353	135.15	4.14846	0.00191475
4	0.104353	144.758	4.15298	0.023364
4	0.104353	72.5429	4.1377	0.0155204
4	0.104353	24.2828	4.13024	-0.0534458
4	0.104353	130.486	4.14266	-0.010993
4	0.104353	283.459	4.152	-0.00330548
4	0.104353	100.495	4.14773	0.022644
4	0.104353	171.022	4.15036	-0.00394113
4	0.104353	153.663	4.15091	0.0115705
4	0.104353	116.08	4.12335	-0.00105464
4	0.104353	189.588	4.12213	-0.0547373
4	0.104353	159.975	4.14786	-0.0154287
4	0.104353	158.987	4.15905	0.0254671
4	0.104353	70.6099	4.14267	0.0302999
4	0.104353	34.2612	4.13834	-0.0416525
4	0.104353	75.6819	4.14253	-0.00710552
4	0.104353	34.3468	4.1108	-0.00643719
4	0.104353	407.012	4.14062	-0.0223718
4	0.104353	120.279	4.14996	0.00362099
4	0.104353	354.917	4.14773	-0.010285
4	0.104353	120.186	4.15814	0.0263831
4	0.104353	59.2959	4.13985	0.0181673
4	0.104353	101.107	4.12677	-0.0532421
4	0.104353	153.298	4.13992	-0.0192771
4	0.104353	168.412	4.10751	-0.00494692
4	0.104353	214.217	4.15551	0.0160895
4	0.104353	99.1372	4.14407	0.0350865
4	0.104353	41.9248	4.13812	-0.0211278
4	0.104353	58.5096	4.12457	0.0109165
4	0.104353	336.273	4.1333	-0.0288367
4	0.104353	406.981	4.14758	-0.0324665
4	0.104353	182.321	4.10002	0.00609137
4	0.104353	80.1744	4.14267	0.0386183
4	0.104353	109.482	4.13364	-0.0352172
4	0.104353	366.712	4.14727	-0.0426003
4	0.104353	119.885	4.11203	0.00951567
4	0.104353	103.309	4.13587	-0.0133371
4	0.104353	161.274	4.09114	0.018944
4	0.104353	73.0329	4.1363	0.0187099
4	0.104353	344.952	4.14667	-0.0433336
4	0.104353	229.825	4.10496	0.018642
4	0.104353	116.448	4.13248	-0.00727202
4	0.104353	532.227	4.1563	-0.0349927
4	0.104353	49.4553	4.12031	0.011417
4	0.104353	153.773	4.13898	-0.0250926
4	0.104353	153.491	4.09958	0.0363546
4	0.104353	415.423	4.18138	0.0173183
4	0.104353	348.756	4.14316	-0.030993
4	0.104353	218.627	4.1073	0.0218457
4	0.104353	188.175	4.09473	0.0470205
4	0.104353	707.858	4.16802	-0.00524117
4	0.104353	208.278	4.10259	0.0451092
4	0.104353	244.824	4.1974	0.0406765
4	0.104353	153.792	4.08044	0.0311486
4	0.104353	420.252	4.14936	-0.0181797
4	0.104353	110.535	4.1	0.0610668
4	0.104353	596.027	4.18194	0.0344078
4	0.104353	142.2	4.05496	-0.0365004
4	0.104353	246.313	4.20182	0.0510393
4	0.104353	148.583	4.08631	0.0600891
4	0.104353	558.986	4.159	0.0124269
4	0.104353	169.547	4.01885	-0.11202
4	0.104353	299.053	4.18677	0.0234915
4	0.104353	384.703	4.19185	0.0604572
4	0.104353	99.1785	4.06873	0.0100126
4	0.104353	300.762	4.18656	0.0303351
4	0.104353	106.448	4.03251	-0.0761818
4	0.104353	303.643	4.17108	-0.0104104
4	0.104353	283.998	4.19197	0.0567132
4	0.104353	74.6817	4.01111	-0.107771
4	0.104353	314.196	4.16831	-0.00409793
4	0.104353	132.757	4.05924	0.0173192
4	0.104353	75.8435	4.04134	-0.0634443
4	0.104353	267.999	4.16571	-0.0530587
4	0.104353	76.0826	4.02435	-0.0644988
4	0.104353	210.868	4.16929	-0.0471422
4	0.104353	83.8332	4.02014	-0.0969536
4	0.104353	264.449	4.15933	-0.021664
4	0.104353	128.092	4.05936	0.00228313
4	0.104353	194.866	4.16699	-0.0682116
4	0.104353	89.4951	4.02342	-0.0558824
4	0.104353	147.871	4.16678	-0.0291177
4	0.104353	152.779	4.07624	0.0394727
4	0.104353	169.845	4.16199	-0.0368856
4	0.104353	64.5808	4.19253	0.0531216
4	0.104353	122.655	4.05367	0.00222422
4	0.104353	131.251	4.16747	-0.0429069
4	0.104353	104.846	4.07133	0.0465197
4	0.104353	122.08	4.17028	0.0162408
4	0.104353	133.439	4.08372	0.0465713
4	0.104353	119.483	4.06011	0.0322023
4	0.104353	87.6083	4.1892	0.0772917
4	0.104353	107.678	4.16468	-0.0158843
4	0.104353	93.0883	4.08621	0.0641444
4	0.104353	147.891	4.1667	0.0288655
4	0.104353	152.218	4.06024	0.0147004
4	0.104353	102.065	4.1727	0.0652536
4	0.104353	115.644	4.07251	0.0616039
4	0.104353	123.393	4.17748	0.0593166
4	0.104353	144.554	4.07664	0.0115288
4	0.104353	177.375	4.15394	-0.0234909
4	0.104353	140.084	4.06915	0.0357422
4	0.104353	111.049	4.17757	0.0599541
4	0.104353	316.863	4.14044	-0.0646655
4	0.104353	133.854	4.09052	0.0092861
4	0.104353	95.1253	4.17205	0.0118993
4	0.104353	175.189	4.06314	0.00953298
4	0.104353	334.945	4.15503	0.0114254
4	0.104353	131.259	4.08038	0.0184858
4	0.104353	211.579	4.14987	-0.0236138
4	0.104353	131.06	4.08347	0.00358392
4	0.104353	175.608	4.05969	-0.0305608
4	0.104353	336.978	4.15755	0.0222019
4	0.104353	123.928	4.08807	-0.00114618
4	0.104353	69.7242	4.15933	0.00494715
4	0.104353	140.133	4.06209	-0.0185384
4	0.104353	159.601	4.17384	0.0906431
4	0.104353	157.651	4.06429	-0.0646083
4	0.104353	220.273	4.15411	0.0216563
4	0.104353	139.816	4.07485	-0.0263399
4	0.104353	207.789	4.07162	-0.00033769
4	0.104353	181.677	4.17533	0.104909
4	0.104353	95.9137	4.06055	-0.0579387
4	0.104353	459.917	4.12712	0.0763503
4	0.104353	209.896	4.17272	0.071317
4	0.104353	161.018	4.07469	-0.0240298
4	0.104353	152.645	4.15637	0.0760644
4	0.104353	206.242	4.13808	0.0832164
4	0.104353	109.075	4.05928	-0.04618
4	0.104353	81.2476	4.12366	0.0183173
4	0.104353	229.036	4.10149	0.0634177
4	0.104353	181.299	4.17688	0.116436
4	0.104353	51.2044	4.07675	-0.0697089
4	0.104353	54.6783	4.13672	0.0604803
4	0.104353	409.6	4.15119	0.120525
4	0.104353	172.245	4.10875	-0.014128
4	0.104353	132.45	4.09359	0.0172637
4	0.104353	172.784	4.16621	0.114371
4	0.104353	92.4517	4.13363	0.0375068
4	0.104353	40.3197	4.1385	0.0365089
4	0.104353	312.871	4.13784	0.104651
4	0.104353	98.814	4.09923	-0.0295603
4	0.104353	75.5965	4.10179	-0.0410753
4	0.104353	67.4383	4.14842	0.0676828
4	0.104353	178.066	4.15902	0.109432
4	0.104353	80.8775	4.13148	-0.00575385
4	0.104353	110.704	4.12424	0.047458
4	0.104353	97.1441	4.11467	-2.66e-05
4	0.104353	39.8246	4.14743	0.0248448
4	0.104353	209.348	4.15866	0.131736
4	0.104353	123.428	4.10378	-0.0296673
4	0.104353	103.485	4.14282	0.0520709
4	0.104353	42.1865	4.14461	-0.021466
4	0.104353	93.3918	4.09079	-0.0224997
5	0.139137	446.391	4.13745	-0.00824326
5	0.139137	133.065	4.13698	-0.000304238
5	0.139137	548.231	4.1315	-0.0235893
5	0.139137	164.248	4.13427	0.00111869
5	0.139137	161.435	4.12713	-0.0111663
5	0.139137	464.579	4.13701	-0.00622163
5	0.139137	233.786	4.14173	0.000967161
5	0.139137	256.39	4.13655	0.0227316
5	0.139137	302.643	4.12991	-0.0222305
5	0.139137	55.5767	4.13033	-0.0329252
5	0.139137	313.363	4.1391	-0.00210673
5	0.139137	128.031	4.1407	0.00480482
5	0.139137	193.801	4.1387	0.00121803
5	0.139137	101.12	4.15095	0.0169541
5	0.139137	439.979	4.13749	-0.0120421
5	0.139137	251.512	4.13659	-0.014049
5	0.139137	112.887	4.13903	0.0146721
5	0.139137	218.998	4.13429	-0.00412891
5	0.139137	321.329	4.1174	-0.0337991
5	0.139137	1.79192	4.13429	-0.0369655
5	0.139137	226.116	4.14141	-0.00268878
5	0.139137	198.534	4.14825	0.00673265
5	0.139137	207.568	4.14209	0.0249597
5	0.139137	72.7631	4.16172	0.0303506
5	0.139137	274.472	4.13867	-0.0115805
5	0.139137	479.781	4.09921	-0.043673
5	0.139137	166.309	4.12677	-0.0400337
5	0.139137	135.184	4.14317	0.00392179
5	0.139137	614.544	4.1511	0.0100807
5	0.139137	45.3281	4.1378	0.00733746
5	0.139137	45.7991	4.14053	-0.0213849
5	0.139137	2.31703	4.10429	-0.0187128
5	0.139137	262.271	4.16138	0.0261988
5	0.139137	231.889	4.11862	-0.0147111
5	0.139137	58.4969	4.12365	-0.0548123
5	0.139137	509.502	4.14255	-0.0196396
5	0.139137	120.034	4.11133	-0.00426299
5	0.139137	84.2959	4.15049	-0.00904175
5	0.139137	116.346	4.10637	-0.0166854
5	0.139137	575.06	4.15417	0.00423291
5	0.139137	169.301	4.09453	-0.00914422
5	0.139137	298.691	4.13809	-0.0362312
5	0.139137	47.0585	4.10942	-0.00987247
5	0.139137	121.292	4.08183	-0.0205114
5	0.139137	427.438	4.15818	-0.0337411
5	0.139137	572.201	4.14914	-0.0202457
5	0.139137	174.539	4.10423	-0.00948071
5	0.139137	133.903	4.07383	-0.0352084
5	0.139137	271.827	4.14705	-0.0383696
5	0.139137	154.004	4.09034	-0.00828689
5	0.139137	505.329	4.16482	-0.0103075
5	0.139137	177.085	4.05606	-0.0688846
5	0.139137	398.176	4.14366	-0.0379795
5	0.139137	194.491	4.19824	0.0239734
5	0.139137	179.603	4.08225	-0.00641758
5	0.139137	479.439	4.15769	-0.035009
5	0.139137	326.714	4.1757	0.0137026
5	0.139137	203.568	4.06811	-0.0272535
5	0.139137	163.973	4.21638	0.0293946
5	0.139137	596.346	4.16751	-0.0163627
5	0.139137	195.826	4.04227	-0.0892444
5	0.139137	172.189	4.1957	0.0238245
5	0.139137	213.16	4.08308	0.0175984
5	0.139137	207.973	4.01115	-0.146211
5	0.139137	203.202	4.22156	0.0458888
5	0.139137	171.959	4.06308	-0.0305941
5	0.139137	246.745	4.23932	0.0877576
5	0.139137	110.218	4.00951	-0.127445
5	0.139137	182.009	4.21016	0.0412029
5	0.139137	195.495	4.03342	-0.114895
5	0.139137	241.822	4.22096	0.0575624
5	0.139137	45.3495	4.03388	-0.0601226
5	0.139137	249.932	4.23338	0.0613362
5	0.139137	169.985	4.00961	-0.147778
5	0.139137	249.442	4.20477	0.0470518
5	0.139137	109.967	4.04884	-0.0129691
5	0.139137	271.928	4.20466	0.0451446
5	0.139137	58.9609	4.01556	-0.097915
5	0.139137	272.116	4.20635	0.00636084
5	0.139137	118.589	4.04823	0.0182995
5	0.139137	75.0835	4.04598	-0.0288204
5	0.139137	284.533	4.19076	0.00333844
5	0.139137	159.442	4.05352	0.0215909
5	0.139137	101.337	4.00967	-0.11361
5	0.139137	246.819	4.1841	-0.0206328
5	0.139137	125.671	4.05497	0.0197285
5	0.139137	104.991	4.18322	-0.00638282
5	0.139137	69.2993	4.03192	-0.0513708
5	0.139137	276.787	4.17619	-0.0387645
5	0.139137	86.9568	4.05689	0.0336893
5	0.139137	172.232	4.17398	-0.0210723
5	0.139137	111.74	4.05905	0.00402713
5	0.139137	103.592	4.20477	0.0488342
5	0.139137	109.957	4.0658	0.0393071
5	0.139137	92.4035	4.20853	0.0837322
5	0.139137	103.063	4.05441	-0.0178989
5	0.139137	114.298	4.18066	0.0105647
5	0.139137	86.8966	4.0627	0.0262444
5	0.139137	68.4015	4.21871	0.075515
5	0.139137	128.724	4.04652	-0.0122149
5	0.139137	125.913	4.17643	0.0461139
5	0.139137	112.12	4.05827	0.00201855
5	0.139137	212.935	4.12544	-0.0539451
5	0.139137	134.656	4.05092	0.0141447
5	0.139137	95.6348	4.19829	0.0682266
5	0.139137	144.815	4.05543	0.00329343
5	0.139137	189.991	4.14441	-0.011652
5	0.139137	144.041	4.06624	0.0344597
5	0.139137	143.13	4.05953	0.00546716
5	0.139137	334.466	4.12041	-0.103315
5	0.139137	126.119	4.06634	0.0124296
5	0.139137	158.525	4.06861	0.0293949
5	0.139137	328.829	4.12105	-0.0713758
5	0.139137	150.748	4.06568	-0.0287755
5	0.139137	259.661	4.13522	-0.0689171
5	0.139137	129.016	4.07839	0.0284257
5	0.139137	84.5983	4.15012	0.0207176
5	0.139137	191.437	4.06367	0.0179248
5	0.139137	402.749	4.13072	-0.0791203
5	0.139137	199.821	4.07663	-0.0472314
5	0.139137	101.456	4.15268	0.0440355
5	0.139137	132.246	4.07561	0.0245761
5	0.139137	287.027	4.07501	-0.0183884
5	0.139137	207.993	4.1497	0.00844469
5	0.139137	181.644	4.06509	-0.0216284
5	0.139137	128.517	4.1184	0.00243561
5	0.139137	250.089	4.07174	-0.0434379
5	0.139137	99.3123	4.16787	0.0685768
5	0.139137	83.6287	4.11142	-0.0155716
5	0.139137	302.235	4.08753	-0.00722657
5	0.139137	207.39	4.06897	-0.0568103
5	0.139137	141.66	4.14396	0.0312332
5	0.139137	274.359	4.09101	0.0173254
5	0.139137	198.023	4.11165	0.00836153
5	0.139137	236.5	4.07234	-0.0350515
5	0.139137	108.309	4.1718	0.0762253
5	0.139137	101.708	4.08111	-0.0267102
5	0.139137	87.1236	4.11616	-0.00328966
5	0.139137	441.579	4.10758	0.0222311
5	0.139137	278.332	4.09683	-0.00435625
5	0.139137	238.316	4.06372	-0.0483621
5	0.139137	188.059	4.16686	0.0662505
5	0.139137	125.89	4.09912	0.0452379
5	0.139137	73.3635	4.11427	0.00029121
5	0.139137	299.772	4.09363	0.00591329
5	0.139137	161.834	4.08757	-0.0199101
5	0.139137	107.222	4.1384	0.0313575
5	0.139137	404.819	4.12655	0.0732916
5	0.139137	185.98	4.10912	0.00661175
5	0.139137	70.0114	4.10511	0.019289
5	0.139137	46.9428	4.12546	0.0292852
5	0.139137	217.884	4.09412	-0.0192677
5	0.139137	76.18	4.10476	-0.0159153
6	0.173921	842.488	4.12251	-0.0199842
6	0.173921	252.966	4.13559	0.0132865
6	0.173921	287.201	4.11654	-0.024722
6	0.173921	489.788	4.12829	-0.0169493
6	0.173921	71.8346	4.1269	-0.00441937
6	0.173921	520.549	4.13599	-0.00815062
6	0.173921	848.214	4.12303	-0.0224463
6	0.173921	147.153	4.13666	0.0161735
6	0.173921	103.173	4.13054	-0.0025349
6	0.173921	159.732	4.11819	-0.0237373
6	0.173921	927.502	4.10757	-0.0657725
6	0.173921	73.5152	4.14137	0.0108393
6	0.173921	606.099	4.1307	-0.0145098
6	0.173921	140.305	4.13567	0.00620533
6	0.173921	504.576	4.13664	0.010636
6	0.173921	436.464	4.12176	-0.029453
6	0.173921	2312.24	4.08332	-0.0935382
6	0.173921	60.6916	4.13786	0.00332549
6	0.173921	369.312	4.13268	-0.0107324
6	0.173921	76.7183	4.12535	-0.0133897
6	0.173921	217.582	4.12924	-0.031898
6	0.173921	161.386	4.14365	0.0246286
6	0.173921	758.992	4.13176	-0.015458
6	0.173921	382.053	4.10141	-0.0669854
6	0.173921	188.431	4.13895	0.00710583
6	0.173921	142.385	4.13371	0.00971319
6	0.173921	217.316	4.1632	0.0478841
6	0.173921	245.194	4.12059	-0.0263633
6	0.173921	1277.59	4.09699	-0.0758629
6	0.173921	14.8208	4.13802	-0.0102294
6	0.173921	-73.0696	4.10999	0.00584333
6	0.173921	482.432	4.1369	0.00709828
6	0.173921	158.933	4.1552	0.0419428
6	0.173921	1100.54	4.08775	-0.0850733
6	0.173921	158.482	4.13614	-0.00841902
6	0.173921	392.258	4.15976	0.0326757
6	0.173921	104.396	4.10513	-0.00142255
6	0.173921	264.714	4.12286	-0.0397497
6	0.173921	65.4208	4.14149	-0.0036769
6	0.173921	223.66	4.13692	-0.03559
6	0.173921	-20.5446	4.10597	-0.025092
6	0.173921	123.25	4.16513	0.0494292
6	0.173921	78.175	4.08892	-0.0254909
6	0.173921	1003.64	4.09352	-0.0687994
6	0.173921	514.146	4.14766	-0.00100684
6	0.173921	63.8665	4.11059	0.00775394
6	0.173921	140.169	4.14068	-0.0457557
6	0.173921	266.622	4.09678	-0.0513104
6	0.173921	378.836	4.16125	0.0403562
6	0.173921	125.14	4.09705	-0.0151836
6	0.173921	393.662	4.1383	-0.0290873
6	0.173921	5.79427	4.11009	-0.00613367
6	0.173921	72.1775	4.08489	-0.0218195
6	0.173921	217.186	4.15197	-0.0502043
6	0.173921	146.002	4.10705	-0.00282688
6	0.173921	341.968	4.16702	-0.034568
6	0.173921	9.90964	4.08625	-0.00103341
6	0.173921	195.341	4.13869	-0.0441099
6	0.173921	115.5	4.08969	-0.0169475
6	0.173921	423.323	4.15897	-0.0427776
6	0.173921	51.7379	4.08223	-0.00642859
6	0.173921	242.539	4.18324	-0.0164609
6	0.173921	81.5562	4.07825	-0.0227511
6	0.173921	218.121	4.14976	-0.0470642
6	0.173921	45.4818	4.05154	-0.0434868
6	0.173921	453.662	4.16588	-0.0240106
6	0.173921	82.1904	4.07277	-0.0300556
6	0.173921	29.192	4.03675	-0.0586694
6	0.173921	166.713	4.20183	0.0187606
6	0.173921	130.384	4.0502	-0.0718217
6	0.173921	265.256	4.22137	0.072347
6	0.173921	314.551	4.17994	0.00550101
6	0.173921	111.895	4.01942	-0.0978017
6	0.173921	169.738	4.21704	0.0474112
6	0.173921	282.971	4.23475	0.0911594
6	0.173921	55.8614	4.02567	-0.087233
6	0.173921	175.442	4.02386	-0.110742
6	0.173921	224.476	4.22801	0.0573796
6	0.173921	48.5354	4.04362	-0.0511518
6	0.173921	215.624	4.24492	0.108278
6	0.173921	142.916	4.00679	-0.12281
6	0.173921	95.6959	4.22401	0.0588721
6	0.173921	45.6626	4.0398	-0.011338
6	0.173921	233.404	4.24085	0.06865
6	0.173921	51.8863	4.02553	-0.0826394
6	0.173921	169.266	4.24843	0.107636
6	0.173921	103.893	4.02719	0.00699867
6	0.173921	64.9719	4.19439	0.00483102
6	0.173921	53.8684	4.0462	-0.0272411
6	0.173921	195.951	4.03405	-0.00160598
6	0.173921	198.906	4.232	0.044984
6	0.173921	111.161	4.03924	0.00648252
6	0.173921	253.414	4.0442	-0.0153857
6	0.173921	63.8509	4.16686	-0.0345998
6	0.173921	152.11	4.03913	0.0128806
6	0.173921	174.775	4.19657	-0.0149963
6	0.173921	257.378	4.04916	0.00717736
6	0.173921	58.106	4.1677	-0.0374104
6	0.173921	197.966	4.18425	0.0469306
6	0.173921	205.638	4.04342	-0.0114948
6	0.173921	104.763	4.17839	-0.035883
6	0.173921	114.957	4.19069	0.0210701
6	0.173921	87.9387	4.02695	-0.0327548
6	0.173921	149.944	4.18864	0.0816035
6	0.173921	185.858	4.05383	-0.00352077
6	0.173921	134.616	4.15023	-0.0179664
6	0.173921	89.5527	4.02703	-0.0270433
6	0.173921	113.907	4.212	0.0782527
6	0.173921	113.129	4.04287	-0.0283066
6	0.173921	116.839	4.1759	0.0427019
6	0.173921	138.347	4.04248	-0.0156727
6	0.173921	140.379	4.13053	-0.0624593
6	0.173921	115.986	4.03635	-0.0307944
6	0.173921	193.96	4.06074	-0.00703821
6	0.173921	159.92	4.10916	-0.101303
6	0.173921	130.253	4.14822	-0.00858084
6	0.173921	149.3	4.04392	-0.00167763
6	0.173921	263.654	4.05439	0.000784721
6	0.173921	218.209	4.11559	-0.102026
6	0.173921	125.36	4.05224	-0.00172199
6	0.173921	135.929	4.0611	0.0107542
6	0.173921	230.963	4.10091	-0.0933719
6	0.173921	207.109	4.04668	-0.00220616
6	0.173921	155.112	4.0697	0.00722437
6	0.173921	474.959	4.12576	-0.0208483
6	0.173921	145.893	4.06607	0.0177656
6	0.173921	323.653	4.10885	-0.116037
6	0.173921	129.167	4.05741	-0.00999511
6	0.173921	251.859	4.13954	0.0139005
6	0.173921	247.858	4.07633	0.00270183
6	0.173921	174.663	4.11871	-0.052749
6	0.173921	170.367	4.10494	-0.00367371
6	0.173921	140.169	4.06626	-0.0323713
6	0.173921	181.606	4.09471	0.00450951
6	0.173921	178.838	4.07401	-0.0225802
6	0.173921	224.56	4.14995	0.0184953
6	0.173921	187	4.06552	-0.0612042
6	0.173921	121	4.10103	-0.0239486
6	0.173921	233.539	4.07425	-0.011075
6	0.173921	264.814	4.07238	-0.0428211
6	0.173921	112.019	4.12816	0.0217429
6	0.173921	204.415	4.06761	-0.0414191
6	0.173921	193.203	4.11027	0.00776861
6	0.173921	265.207	4.07684	-0.0222842
6	0.173921	148.505	4.06536	-0.0640586
6	0.173921	117.502	4.1054	-0.0243341
6	0.173921	236.889	4.07767	-0.0153756
6	0.173921	242.042	4.09163	-0.0231311
6	0.173921	172.493	4.06898	-0.0381844
6	0.173921	154.51	4.11419	-0.00785817
6	0.173921	204.934	4.07364	-0.0675801
6	0.173921	334.604	4.08401	-0.0116261
6	0.173921	247.642	4.10699	0.00745963
6	0.173921	100.329	4.07312	-0.0255429
6	0.173921	288.031	4.08655	-0.0437199
7	0.208705	635.441	4.10895	-0.0125396
7	0.208705	143.444	4.13084	0.0132646
7	0.208705	165.765	4.11604	-0.00122206
7	0.208705	595.772	4.11475	-0.0244627
7	0.208705	186.874	4.11896	0.014314
7	0.208705	290.412	4.14453	0.042963
7	0.208705	375.034	4.11411	-0.0111067
7	0.208705	-33.2047	4.12707	0.0218202
7	0.208705	341.187	4.12304	-0.0117612
7	0.208705	153.568	4.11723	0.00361179
7	0.208705	237.191	4.13891	0.0156185
7	0.208705	874.855	4.11489	-0.0202398
7	0.208705	114.332	4.12831	0.0186117
7	0.208705	114.882	4.13423	0.0150061
7	0.208705	188.983	4.1169	-0.0151355
7	0.208705	1946.06	4.10677	-0.0397811
7	0.208705	-0.4626	4.13354	0.0174435
7	0.208705	487.38	4.12191	-0.0212222
7	0.208705	124.022	4.12335	0.0100051
7	0.208705	536.618	4.14107	0.0213145
7	0.208705	486.98	4.1386	0.0250583
7	0.208705	632.951	4.11652	-0.0197578
7	0.208705	3335.49	4.09092	-0.0696121
7	0.208705	49.7216	4.13379	0.0210653
7	0.208705	252.193	4.12765	-0.00877345
7	0.208705	107.687	4.12009	-0.0137616
7	0.208705	314.493	4.12433	-0.032431
7	0.208705	172.537	4.13724	0.0198353
7	0.208705	308.469	4.10497	-0.0522108
7	0.208705	122.54	4.132	0.0158594
7	0.208705	358.711	4.15088	0.0361851
7	0.208705	2780.38	4.08621	-0.0764899
7	0.208705	-4.96757	4.1379	0.0129493
7	0.208705	232.57	4.15055	0.0156187
7	0.208705	13.8449	4.10743	-6.0711e-05
7	0.208705	252.999	4.1425	0.0319608
7	0.208705	1635.49	4.09428	-0.0867518
7	0.208705	251.107	4.15605	0.0400432
7	0.208705	76.0756	4.1051	-0.0103278
7	0.208705	237.77	4.14418	-0.00789779
7	0.208705	-100.081	4.10797	-0.0226604
7	0.208705	208.854	4.15572	0.0437128
7	0.208705	33.0235	4.09371	-0.0191384
7	0.208705	322.548	4.1547	0.0198554
7	0.208705	9.16787	4.10807	0.00680958
7	0.208705	17.9583	4.10073	0.00229401
7	0.208705	151.106	4.13954	-0.023342
7	0.208705	90.9486	4.09873	-0.0198924
7	0.208705	131.717	4.15062	-0.0355422
7	0.208705	-35.0407	4.10898	0.044308
7	0.208705	359.621	4.14815	-0.0134068
7	0.208705	43.0553	4.08946	-0.0159157
7	0.208705	106.263	4.14423	-0.036799
7	0.208705	261.843	4.1529	-0.0356802
7	0.208705	-25.8726	4.10236	0.0194008
7	0.208705	170.834	4.15265	-0.0444463
7	0.208705	-73.707	4.10484	0.0461818
7	0.208705	257.859	4.16548	-0.0328429
7	0.208705	30.2398	4.0898	-0.00676201
7	0.208705	-29.7903	4.09506	0.0269608
7	0.208705	180.264	4.19957	0.0198458
7	0.208705	347.956	4.15728	-0.04114
7	0.208705	-22.0693	4.09812	0.0268062
7	0.208705	35.1226	4.08087	0.0112491
7	0.208705	162.913	4.18204	-0.0181953
7	0.208705	-10.9944	4.08928	0.0126991
7	0.208705	229.345	4.20931	0.035039
7	0.208705	154.657	4.06442	0.0228745
7	0.208705	-3.18455	4.06685	-0.0119448
7	0.208705	121.786	4.19782	0.00896537
7	0.208705	96.6282	4.05253	0.0236785
7	0.208705	270.376	4.21748	0.0472234
7	0.208705	65.7881	4.05825	-0.00891334
7	0.208705	396.043	4.21277	0.0448701
7	0.208705	158.898	4.20984	0.0417945
7	0.208705	108.845	4.05625	0.00272622
7	0.208705	266.222	4.22367	0.0755414
7	0.208705	224.649	4.21329	0.0479553
7	0.208705	49.0964	4.04154	-0.00655209
7	0.208705	54.2953	4.04884	-0.0426066
7	0.208705	151.627	4.22896	0.100604
7	0.208705	92.1129	4.02148	-0.0174071
7	0.208705	54.0059	4.20589	0.0177922
7	0.208705	51.4942	4.04965	-0.0236881
7	0.208705	103.176	4.0225	-0.0184674
7	0.208705	87.9776	4.2329	0.0962467
7	0.208705	53.0324	4.03104	-0.0118131
7	0.208705	117.434	4.02056	-0.0157915
7	0.208705	17.4117	4.18191	-0.0150374
7	0.208705	100.268	4.0207	-0.00902162
7	0.208705	422.574	4.16168	-0.0280503
7	0.208705	118.986	4.01588	-0.0078214
7	0.208705	169.925	4.03257	-0.0171031
7	0.208705	82.4381	4.15942	-0.0217758
7	0.208705	484.629	4.16156	-0.0236795
7	0.208705	180.913	4.02976	-0.0230975
7	0.208705	169.163	4.15748	-0.0381009
7	0.208705	58.5062	4.01471	-0.0205872
7	0.208705	350.772	4.16308	-0.00376064
7	0.208705	214.617	4.14795	-0.0204764
7	0.208705	8.8649	4.01768	-0.0182107
7	0.208705	228.417	4.17004	-0.0191348
7	0.208705	133.853	4.02679	-0.0259853
7	0.208705	215.745	4.16448	0.0293312
7	0.208705	78.6417	4.02839	-0.00779147
7	0.208705	175.805	4.14605	-0.0124046
7	0.208705	38.0076	4.01705	-0.0243824
7	0.208705	287.788	4.03372	-0.00598472
7	0.208705	76.9645	4.14529	-0.0108695
7	0.208705	162.875	4.16213	0.0261082
7	0.208705	95.2112	4.0266	-0.0182656
7	0.208705	682.384	4.0286	-0.0273452
7	0.208705	123.189	4.14086	-0.0267108
7	0.208705	198.196	4.04117	-0.0277771
7	0.208705	145.734	4.04298	-0.0109194
7	0.208705	85.5833	4.13005	-0.0545828
7	0.208705	524.173	4.02213	-0.041931
7	0.208705	222.352	4.05933	0.0322677
7	0.208705	721.16	4.09921	-0.0574048
7	0.208705	356.026	4.04586	-0.0115875
7	0.208705	98.9742	4.12707	-0.0716255
7	0.208705	209.539	4.03521	-0.0322457
7	0.208705	1491.6	4.12769	0.00661631
7	0.208705	178.022	4.07602	0.0562344
7	0.208705	165.349	4.10255	-0.0807583
7	0.208705	437.645	4.03469	-0.0235598
7	0.208705	139.396	4.11485	0.00734335
7	0.208705	154.331	4.05549	0.00709109
7	0.208705	1177.61	4.10993	-0.0218332
7	0.208705	165.627	4.07225	-0.0488395
7	0.208705	233.738	4.07282	0.0403021
7	0.208705	231.694	4.03553	-0.0159964
7	0.208705	566.918	4.13194	0.0225327
7	0.208705	330.942	4.0642	-0.0161228
7	0.208705	117.692	4.07819	-0.0132596
7	0.208705	147.608	4.07033	0.0391831
7	0.208705	345.595	4.10093	-0.063341
7	0.208705	176.056	4.06047	-0.0158845
7	0.208705	145.5	4.09599	-0.0143114
7	0.208705	280.42	4.06132	0.0113831
7	0.208705	212.401	4.0698	0.0123216
7	0.208705	840.609	4.13282	0.00579899
7	0.208705	272.952	4.07307	-0.0376643
7	0.208705	155.319	4.08244	-0.0249163
7	0.208705	164.31	4.07624	0.0246438
7	0.208705	223.517	4.05715	-0.0112601
7	0.208705	120.933	4.12027	0.0216412
7	0.208705	206.099	4.06133	-0.0257598
7	0.208705	143.021	4.08931	0.0107051
7	0.208705	168.157	4.06829	-0.0424251
7	0.208705	156.652	4.08982	-0.0229961
7	0.208705	210.845	4.06879	-0.00171485
7	0.208705	251.554	4.07043	-0.0068265
7	0.208705	250.177	4.06559	-0.0552559
7	0.208705	150.319	4.09793	-0.0125081
7	0.208705	200.262	4.06057	-0.0492138
8	0.243489	217.623	4.11519	-0.00360671
8	0.243489	448.755	4.09859	-0.0149388
8	0.243489	91.4231	4.13819	0.0381188
8	0.243489	191.875	4.107	0.0054636
8	0.243489	286.776	4.10864	-0.0216069
8	0.243489	484.179	4.10373	0.00789066
8	0.243489	207.805	4.1524	0.0726953
8	0.243489	378.846	4.10493	-0.00441182
8	0.243489	3676.36	4.1213	0.00854828
8	0.243489	182.632	4.11041	0.0170514
8	0.243489	206.284	4.12407	0.00666774
8	0.243489	232.92	4.10784	0.0111568
8	0.243489	208.732	4.14636	0.0504218
8	0.243489	227.241	4.11751	0.00224098
8	0.243489	597.267	4.10652	-0.0216227
8	0.243489	971.66	4.11451	-0.0190416
8	0.243489	311.464	4.11339	0.00710605
8	0.243489	111.858	4.14397	0.0476518
8	0.243489	230.262	4.11287	-0.0022846
8	0.243489	2725.53	4.12158	0.0066827
8	0.243489	22.2363	4.11884	0.0184005
8	0.243489	292.907	4.1166	-0.0171746
8	0.243489	227.658	4.11083	0.0139956
8	0.243489	245.311	4.14866	0.0548558
8	0.243489	824.1	4.12111	0.00645333
8	0.243489	3115.63	4.11049	-0.0258566
8	0.243489	95.2598	4.12101	0.0166871
8	0.243489	312.385	4.13583	0.0283626
8	0.243489	711.891	4.13028	0.00683166
8	0.243489	18.5224	4.1267	0.0132229
8	0.243489	498.746	4.10878	-0.028589
8	0.243489	905.307	4.13212	0.0172248
8	0.243489	3895.97	4.10165	-0.0324695
8	0.243489	307.912	4.14461	0.0318625
8	0.243489	480.688	4.10442	-0.0105613
8	0.243489	311.826	4.13019	0.0156138
8	0.243489	1546.81	4.10448	-0.0521363
8	0.243489	420.986	4.14341	0.0310409
8	0.243489	286.994	4.10252	-0.00860808
8	0.243489	156.364	4.14624	0.0222591
8	0.243489	258.953	4.10654	-0.0185164
8	0.243489	135.35	4.10157	-0.00161407
8	0.243489	265.202	4.14681	0.00810846
8	0.243489	185.087	4.1496	0.0343116
8	0.243489	161.697	4.10488	-0.00712712
8	0.243489	57.6007	4.10864	0.00577274
8	0.243489	177.489	4.14225	0.00969007
8	0.243489	29.4976	4.09985	-0.0124753
8	0.243489	347.435	4.15002	-0.0126051
8	0.243489	191.301	4.1056	0.0265039
8	0.243489	27.5344	4.10066	-0.00487279
8	0.243489	130.046	4.14255	-0.00590201
8	0.243489	-40.5129	4.09671	0.0366456
8	0.243489	365.484	4.14852	-0.0235939
8	0.243489	-12.1508	4.1086	0.0192966
8	0.243489	174.799	4.1719	-0.00560307
8	0.243489	89.0177	4.14788	-0.0258654
8	0.243489	-25.5964	4.10417	0.0509001
8	0.243489	224.071	4.15031	-0.0279576
8	0.243489	-80.0172	4.09485	0.0468343
8	0.243489	525.915	4.19079	0.0184179
8	0.243489	-36.4693	4.08471	0.0325904
8	0.243489	143.611	4.16546	-0.0241893
8	0.243489	-79.6475	4.10261	0.0545472
8	0.243489	1081.34	4.20703	0.0370702
8	0.243489	88.3477	4.07022	0.0265097
8	0.243489	1420.68	4.20564	0.0210162
8	0.243489	-21.8106	4.09063	0.0294987
8	0.243489	64.5643	4.18662	-0.00414572
8	0.243489	30.7721	4.05787	0.0407687
8	0.243489	1106.62	4.21316	0.0398011
8	0.243489	88.4097	4.07751	0.0251522
8	0.243489	1237.66	4.19922	-0.00242201
8	0.243489	18.2245	4.05419	0.0392492
8	0.243489	128.781	4.06453	0.0318876
8	0.243489	827.054	4.21382	0.0311365
8	0.243489	1077.76	4.19634	-0.0143897
8	0.243489	49.4746	4.0485	0.0343879
8	0.243489	599.593	4.2121	0.0267673
8	0.243489	116.895	4.03961	0.0184929
8	0.243489	933.693	4.19272	-0.0131122
8	0.243489	140.868	4.02028	-0.00621189
8	0.243489	1126.57	4.1711	-0.0383047
8	0.243489	73.5759	4.03809	0.00824417
8	0.243489	126.689	4.00178	-0.0121432
8	0.243489	790.022	4.18667	-0.0168779
8	0.243489	134.954	4.02694	-0.00798701
8	0.243489	463.802	4.17087	-0.0439516
8	0.243489	221.277	4.00309	0.000495927
8	0.243489	95.5375	4.01514	-0.0152822
8	0.243489	394.545	4.17501	-0.0411761
8	0.243489	151.285	4.01876	0.0143568
8	0.243489	732.33	4.16822	-0.030948
8	0.243489	130.432	4.0084	-0.00656962
8	0.243489	451.661	4.15226	-0.0198657
8	0.243489	173.954	4.16502	-0.0450893
8	0.243489	202.701	4.01442	0.00557259
8	0.243489	747.586	4.16254	-0.0110797
8	0.243489	436.967	4.14297	-0.043813
8	0.243489	74.3343	4.02157	0.00863084
8	0.243489	452.687	4.15619	-0.00989399
8	0.243489	24.0251	4.01888	0.0136522
8	0.243489	324.183	4.13411	-0.0525366
8	0.243489	84.6563	4.01519	-0.00527521
8	0.243489	349.868	4.019	0.000196456
8	0.243489	108.17	4.12662	0.0086984
8	0.243489	256.591	4.15109	-0.0245231
8	0.243489	5.14238	4.02236	7.69125e-05
8	0.243489	90.0255	4.15288	0.0111289
8	0.243489	1043.84	4.02055	-0.0230546
8	0.243489	183.373	4.13121	-0.0277827
8	0.243489	152.476	4.02485	0.00522387
8	0.243489	61.5957	4.14789	0.0200323
8	0.243489	848.769	4.00881	-0.0338996
8	0.243489	750.749	4.0521	0.0488234
8	0.243489	335.869	4.13491	-0.0115738
8	0.243489	654.644	4.02269	-0.0177983
8	0.243489	113.355	4.13746	0.00158803
8	0.243489	275.36	4.02405	-0.030278
8	0.243489	2049.59	4.11466	0.00185081
8	0.243489	675.334	4.06229	0.0773579
8	0.243489	86.3308	4.15385	-0.0103772
8	0.243489	958.498	4.01544	-0.0406251
8	0.243489	540.575	4.12326	0.0341109
8	0.243489	298.324	4.04669	0.00570039
8	0.243489	1056.85	4.10681	-0.0309089
8	0.243489	290.707	4.07573	0.0834311
8	0.243489	450.386	4.02045	-0.0504884
8	0.243489	1750.52	4.12965	0.0184783
8	0.243489	369.109	4.05569	0.0495066
8	0.243489	454.857	4.05962	0.0559184
8	0.243489	241.893	4.12279	-0.0476657
8	0.243489	146.643	4.09756	-2.44873e-05
8	0.243489	369.194	4.06723	0.0702888
8	0.243489	172.541	4.05997	0.00197582
8	0.243489	1763	4.10776	-0.0223248
8	0.243489	352.743	4.05725	0.0336759
8	0.243489	220.668	4.05437	-0.0824333
8	0.243489	269.714	4.08638	0.0685881
8	0.243489	224.03	4.05056	-0.00325123
8	0.243489	686.954	4.12978	0.029441
8	0.243489	370.443	4.06384	0.0361551
8	0.243489	135.172	4.06534	-0.0211561
8	0.243489	244.224	4.06146	0.0120431
8	0.243489	109.95	4.079	-0.0555099
8	0.243489	301.893	4.07434	0.0546127
8	0.243489	197.338	4.05597	0.00293147
8	0.243489	353.575	4.06674	0.00742516
8	0.243489	182.334	4.06473	-0.0508022
8	0.243489	212.655	4.05365	-0.000784619
8	0.243489	352.95	4.0591	0.0223135
8	0.243489	163.269	4.07156	0.00742908
8	0.243489	245.101	4.06776	-0.00372017
8	0.243489	229.715	4.05329	0.00507131
9	0.278273	431.819	4.08287	-0.0106102
9	0.278273	334.609	4.11185	0.0144778
9	0.278273	467.79	4.08187	0.00302231
9	0.278273	403.533	4.14587	0.0723707
9	0.278273	383.399	4.08701	-0.0245905
9	0.278273	1320.09	4.08547	-0.00871481
9	0.278273	183.526	4.14007	0.053783
9	0.278273	210.319	4.0917	-0.000124772
9	0.278273	1204.75	4.13938	0.0474003
9	0.278273	317.252	4.10366	-0.0132565
9	0.278273	908.173	4.08685	0.000383771
9	0.278273	309.566	4.15044	0.0784076
9	0.278273	344.636	4.09071	-0.0106911
9	0.278273	2307.34	4.12919	0.0264555
9	0.278273	426.383	4.09245	0.00724824
9	0.278273	178.294	4.12802	0.0259671
9	0.278273	270.193	4.09462	0.00825205
9	0.278273	411.545	4.14843	0.0643302
9	0.278273	595.393	4.10195	-0.00375501
9	0.278273	304.392	4.09845	-0.0232703
9	0.278273	696.468	4.11528	0.00291988
9	0.278273	967.517	4.09541	-0.00473981
9	0.278273	208.209	4.14995	0.0666094
9	0.278273	2432.28	4.09797	-0.00218253
9	0.278273	248.471	4.10018	-0.000386669
9	0.278273	2667.38	4.13388	0.0338486
9	0.278273	281.628	4.10022	0.0155671
9	0.278273	1055.4	4.10183	-0.00946144
9	0.278273	373.701	4.09768	0.0120211
9	0.278273	293.839	4.15321	0.0758252
9	0.278273	815.469	4.10403	-0.00684389
9	0.278273	1948.53	4.12243	0.00269223
9	0.278273	404.681	4.10416	0.00333924
9	0.278273	1046.76	4.11507	0.0118825
9	0.278273	901.636	4.10717	0.00196952
9	0.278273	1092.84	4.14039	0.0410976
9	0.278273	244.203	4.11136	0.00855715
9	0.278273	888.174	4.10789	-0.0119411
9	0.278273	1746.54	4.1102	0.00103802
9	0.278273	874.843	4.11946	0.0177183
9	0.278273	696.533	4.13044	0.0272232
9	0.278273	873.344	4.10259	-0.0106725
9	0.278273	527.252	4.13473	0.0426234
9	0.278273	1177.61	4.12313	0.0140221
9	0.278273	741.344	4.10967	0.00190423
9	0.278273	664.681	4.13915	0.0352349
9	0.278273	790.383	4.10412	-0.0166075
9	0.278273	628.454	4.11528	0.0145476
9	0.278273	319.087	4.14071	0.034648
9	0.278273	592.454	4.10409	-0.00919121
9	0.278273	443.003	4.11079	0.0189595
9	0.278273	411.335	4.14141	0.0342723
9	0.278273	456.455	4.10727	0.00262837
9	0.278273	344.487	4.14649	0.0183423
9	0.278273	468.888	4.10644	0.0111505
9	0.278273	474.501	4.14556	-0.00137325
9	0.278273	281.94	4.10926	0.00817957
9	0.278273	290.61	4.1423	0.026356
9	0.278273	176.795	4.09671	0.00872023
9	0.278273	513.094	4.14908	0.000910653
9	0.278273	342.616	4.10894	0.0134509
9	0.278273	455.702	4.09322	0.0223122
9	0.278273	364.464	4.15748	0.000680116
9	0.278273	216.583	4.09993	0.0174481
9	0.278273	473.707	4.14774	-0.0120997
9	0.278273	88.1771	4.09322	0.0221039
9	0.278273	446.767	4.17415	0.0185348
9	0.278273	1312.19	4.20342	0.0581617
9	0.278273	280.14	4.08625	0.027812
9	0.278273	277.995	4.15341	-0.0161197
9	0.278273	854.142	4.19523	0.0416749
9	0.278273	69.4281	4.07004	0.0241704
9	0.278273	1209.59	4.20268	0.0411176
9	0.278273	-45.0548	4.08999	0.0356641
9	0.278273	-36.6323	4.05644	0.0391436
9	0.278273	1485.13	4.20932	0.0501138
9	0.278273	-24.7308	4.07785	0.0286481
9	0.278273	1212.3	4.19431	0.0109441
9	0.278273	46.7418	4.04556	0.0396448
9	0.278273	-0.209649	4.06165	0.030611
9	0.278273	1640.86	4.21128	0.0399821
9	0.278273	1366.77	4.18658	-0.021644
9	0.278273	-82.5962	4.05461	0.0471304
9	0.278273	1260.2	4.162	-0.0335443
9	0.278273	33.7531	4.04323	0.0291492
9	0.278273	1421.56	4.17971	-0.0412881
9	0.278273	128.386	4.00728	-0.0272252
9	0.278273	1583.72	4.16097	-0.0390954
9	0.278273	99.7393	3.98097	-0.0485085
9	0.278273	1512.19	4.17219	-0.045938
9	0.278273	145.117	4.03155	0.00708063
9	0.278273	1334.71	4.16661	-0.0372229
9	0.278273	195.659	3.985	-0.0243432
9	0.278273	127.37	4.00286	-0.0220438
9	0.278273	1589.81	4.1695	-0.0407309
9	0.278273	74.0293	3.99707	0.0121323
9	0.278273	910.39	4.16766	-0.0248228
9	0.278273	132.573	3.99005	-0.0199555
9	0.278273	1133.38	4.15597	-0.00433158
9	0.278273	202.99	4.00292	0.00808307
9	0.278273	857.44	4.16722	-0.0152194
9	0.278273	575.607	4.14516	-0.0285737
9	0.278273	85.7528	4.01018	0.0225526
9	0.278273	706.029	4.15967	-0.0119846
9	0.278273	82.7119	3.99929	0.0245108
9	0.278273	663.922	4.13373	-0.0606539
9	0.278273	310.389	4.00372	0.0162381
9	0.278273	227.073	4.11173	-0.0542915
9	0.278273	37.7805	4.01833	0.0200843
9	0.278273	-3.74148	4.14625	0.02877
9	0.278273	912.058	4.01994	0.0153671
9	0.278273	432.828	4.12057	-0.0755385
9	0.278273	123.059	4.01127	0.0167494
9	0.278273	96.0167	4.12417	0.00535397
9	0.278273	686.013	4.01255	0.0242887
9	0.278273	73.0377	4.1401	0.0171243
9	0.278273	685.594	4.01204	-0.00107708
9	0.278273	230.904	4.11728	-0.0417978
9	0.278273	276.629	4.02247	0.0316622
9	0.278273	1104.96	4.10905	0.0255843
9	0.278273	1810.89	4.0271	0.0627663
9	0.278273	40.5709	4.14784	0.0324002
9	0.278273	1067.12	4.01499	-0.0063093
9	0.278273	921.513	4.02742	0.0417247
9	0.278273	351.387	4.12017	0.00845723
9	0.278273	781.228	4.05369	0.0838206
9	0.278273	452.332	4.01846	0.000385782
9	0.278273	1835.21	4.12127	0.0368321
9	0.278273	1436.71	4.04076	0.0676682
9	0.278273	357.573	4.10679	0.0302128
9	0.278273	488.111	4.05891	0.0838379
9	0.278273	311.861	4.03193	0.0142561
9	0.278273	1164.51	4.10218	0.00559295
9	0.278273	596.674	4.03862	0.04245
9	0.278273	174.597	4.04354	-0.0634328
9	0.278273	748.971	4.06601	0.0832155
9	0.278273	606.785	4.03188	-0.0129465
9	0.278273	1517.89	4.13143	0.0362755
9	0.278273	479.993	4.04776	0.065212
9	0.278273	344.515	4.05045	-0.0481413
9	0.278273	463.304	4.04036	0.0154601
9	0.278273	142.14	4.07736	-0.0131645
9	0.278273	369.568	4.06582	0.0892038
9	0.278273	305.952	4.0472	-0.00394689
9	0.278273	461.22	4.04413	0.0515432
9	0.278273	289.699	4.04518	-0.0831581
9	0.278273	362.045	4.04402	-0.00716719
9	0.278273	413.761	4.05902	0.070764
9	0.278273	228.769	4.05739	-0.0139748
9	0.278273	395.055	4.04902	0.0313292
9	0.278273	124.099	4.05842	-0.064972
9	0.278273	267.475	4.04875	-0.00675317
9	0.278273	226.717	4.05354	-0.0553707
9	0.278273	249.656	4.05448	0.00811321
10	0.313058	593.165	4.06524	-0.0235732
10	0.313058	382.315	4.10758	0.027107
10	0.313058	465.495	4.06672	-0.00860187
10	0.313058	275.984	4.13115	0.0604911
10	0.313058	526.747	4.07623	-0.0335186
10	0.313058	2947.27	4.06325	-0.0187267
10	0.313058	201.478	4.13128	0.0665371
10	0.313058	435.584	4.07395	-0.0113947
10	0.313058	974.951	4.12524	0.0413717
10	0.313058	726.797	4.07538	0.0097763
10	0.313058	497.618	4.09741	-0.00536453
10	0.313058	1202.02	4.06818	-0.00912804
10	0.313058	388.57	4.14104	0.0656388
10	0.313058	569.521	4.07566	-0.024862
10	0.313058	1056.05	4.12302	0.0351167
10	0.313058	1206.03	4.07514	-0.00415108
10	0.313058	266.233	4.12467	0.0455422
10	0.313058	282.413	4.0801	-0.00229896
10	0.313058	460.869	4.13695	0.05539
10	0.313058	944.414	4.08425	-0.00038935
10	0.313058	421.397	4.09103	-0.0253991
10	0.313058	894.625	4.1097	0.00899525
10	0.313058	2000.89	4.07533	-0.0129927
10	0.313058	269.819	4.14377	0.0685114
10	0.313058	3210.6	4.07316	-0.0159703
10	0.313058	1801.53	4.13055	0.0411437
10	0.313058	537.103	4.0826	0.0104534
10	0.313058	1056.17	4.10042	-0.00180901
10	0.313058	764.918	4.08677	-0.0126227
10	0.313058	857.188	4.1219	0.0179335
10	0.313058	2237.27	4.08851	-0.00656159
10	0.313058	1146.55	4.10993	0.0197551
10	0.313058	537.939	4.09311	0.00847781
10	0.313058	1245.67	4.10786	0.0333576
10	0.313058	1096.14	4.10439	-3.5889e-05
10	0.313058	2181.11	4.088	-0.0114264
10	0.313058	968.384	4.12161	0.0419448
10	0.313058	627.195	4.1081	0.0100735
10	0.313058	990.606	4.10336	0.000284014
10	0.313058	1512.72	4.11712	0.0524044
10	0.313058	803.581	4.1156	0.0424254
10	0.313058	1013.69	4.11671	0.0211638
10	0.313058	1023.42	4.12168	0.0297325
10	0.313058	780.031	4.1215	0.0351202
10	0.313058	312.245	4.12512	0.0396682
10	0.313058	759.004	4.12476	0.016485
10	0.313058	802.266	4.11549	0.0397921
10	0.313058	882.381	4.12897	0.0417712
10	0.313058	290.875	4.13286	0.0323851
10	0.313058	450.759	4.10986	0.020146
10	0.313058	872.188	4.1311	0.00938521
10	0.313058	650.44	4.11648	0.0270535
10	0.313058	336.431	4.09856	0.023208
10	0.313058	447.469	4.13874	0.0219062
10	0.313058	614.301	4.11001	0.0232022
10	0.313058	889.901	4.09864	0.037501
10	0.313058	639.849	4.14092	0.0064876
10	0.313058	312.645	4.10383	0.00917818
10	0.313058	1126.33	4.16751	0.0430425
10	0.313058	1330.54	4.0862	0.0353088
10	0.313058	574.776	4.14227	0.00904617
10	0.313058	371.607	4.0981	0.0193978
10	0.313058	634.451	4.1543	0.0160823
10	0.313058	1325.18	4.18318	0.0573397
10	0.313058	1008.49	4.09215	0.0297584
10	0.313058	640.905	4.17436	0.0368621
10	0.313058	874.759	4.07364	0.0271792
10	0.313058	1013.35	4.1924	0.0566939
10	0.313058	763.562	4.0552	0.0332422
10	0.313058	1076.93	4.19291	0.0560047
10	0.313058	606.278	4.0817	0.0260276
10	0.313058	721.026	4.19239	0.039709
10	0.313058	691.288	4.03337	0.020631
10	0.313058	476.874	4.18225	0.0149807
10	0.313058	315.737	4.06265	0.0260792
10	0.313058	602.779	4.18597	0.0120455
10	0.313058	387.677	4.04956	0.0380144
10	0.313058	474.716	4.18125	0.0033663
10	0.313058	161.709	4.023	0.00462359
10	0.313058	792.49	4.17966	-0.0159812
10	0.313058	19.5014	3.98209	-0.0722556
10	0.313058	601.446	4.16956	-0.0090763
10	0.313058	25.5799	3.95664	-0.0943366
10	0.313058	961.757	4.17062	-0.0311075
10	0.313058	41.0251	4.01366	-0.016607
10	0.313058	806.562	4.16375	-0.0213102
10	0.313058	61.0905	3.96217	-0.0645884
10	0.313058	871.937	4.15172	-0.00574563
10	0.313058	84.8475	3.97861	-0.0631028
10	0.313058	-14.6116	3.96922	-0.0012196
10	0.313058	923.181	4.15929	-0.0233722
10	0.313058	81.4417	3.96792	-0.0695605
10	0.313058	1455.01	4.15282	-0.000579683
10	0.313058	84.1819	3.97958	-0.0174282
10	0.313058	1076.76	4.1577	-0.0116543
10	0.313058	1419.28	4.152	0.0016778
10	0.313058	22.3531	3.98493	0.0146783
10	0.313058	588.391	4.13631	-0.031873
10	0.313058	1275.33	4.15788	-0.000994831
10	0.313058	237.969	3.98029	0.0155845
10	0.313058	802.587	4.14665	-0.0172157
10	0.313058	373.452	3.99539	0.0295811
10	0.313058	330.359	4.11922	-0.0590269
10	0.313058	88.6486	3.99354	0.0187264
10	0.313058	68.1902	4.13615	-0.0082103
10	0.313058	567.923	4.00834	0.0608467
10	0.313058	723.891	4.12665	-0.0551955
10	0.313058	221.566	3.98832	0.0186856
10	0.313058	193.052	4.11965	-0.050847
10	0.313058	436.809	4.01177	0.0711182
10	0.313058	-48.5143	4.14193	0.0201786
10	0.313058	566.971	4.00538	0.0302876
10	0.313058	429.978	4.11352	-0.0780954
10	0.313058	620.464	3.99827	0.038452
10	0.313058	281.261	4.11708	0.0232037
10	0.313058	69.6043	4.13314	-0.00662414
10	0.313058	748.495	4.02011	0.0485773
10	0.313058	2013.33	3.99546	-0.00203785
10	0.313058	35.0451	4.1274	0.0219543
10	0.313058	1469.72	4.00938	0.045844
10	0.313058	328.423	4.01491	0.0482533
10	0.313058	830.486	4.12435	0.0355166
10	0.313058	3117.76	3.9932	0.00749306
10	0.313058	376.029	4.11736	0.077408
10	0.313058	1020.13	4.02525	0.0957144
10	0.313058	762.664	4.00815	0.0327754
10	0.313058	327.484	4.11047	0.00992244
10	0.313058	113.159	4.04711	-0.0366594
10	0.313058	1734.94	4.01511	0.0466203
10	0.313058	1193.59	4.13155	0.0674346
10	0.313058	984.533	4.02876	0.0877394
10	0.313058	970.269	4.0374	-0.00854683
10	0.313058	2097.29	4.00856	0.0368414
10	0.313058	1200.53	4.00582	-0.0101675
10	0.313058	185.524	4.09532	0.0370977
10	0.313058	847.021	4.03934	0.0844262
10	0.313058	760.777	4.02536	0.023248
10	0.313058	1019.36	4.02446	0.0582927
10	0.313058	297.41	4.03394	-0.0449884
10	0.313058	1085.93	4.00899	-0.0128181
10	0.313058	872.74	4.13381	0.0732742
10	0.313058	619.441	4.04453	0.0877069
10	0.313058	642.974	4.04436	-0.00902762
10	0.313058	865.457	4.02586	0.0280208
10	0.313058	122.356	4.06397	-0.0220213
10	0.313058	800.739	4.02373	0.00295333
10	0.313058	681.509	4.03921	0.069897
10	0.313058	442.654	4.04064	-0.0582429
10	0.313058	670.306	4.02788	2.44873e-05
10	0.313058	389.496	4.04611	-0.00653065
11	0.347842	481.401	4.07224	-0.0113775
11	0.347842	612.193	4.04944	-0.0285462
11	0.347842	343.538	4.09841	0.0299209
11	0.347842	347.867	4.0521	-0.01549
11	0.347842	396.407	4.10756	0.043743
11	0.347842	525.309	4.06336	-0.0318308
11	0.347842	4426.08	4.03958	-0.0294719
11	0.347842	268.895	4.11904	0.0621152
11	0.347842	576.577	4.05634	-0.0190863
11	0.347842	932.879	4.10643	0.0432756
11	0.347842	687.944	4.05769	0.00524784
11	0.347842	437.554	4.08993	0.00216415
11	0.347842	1166.97	4.05124	-0.019118
11	0.347842	308.402	4.12162	0.0573451
11	0.347842	1085.33	4.05217	-0.0157812
11	0.347842	623.779	4.06153	-0.0346569
11	0.347842	843.074	4.10908	0.0437807
11	0.347842	3089.69	4.05222	-0.0173731
11	0.347842	296.721	4.11382	0.0521216
11	0.347842	365.313	4.0638	-0.0118697
11	0.347842	496.909	4.11614	0.0464982
11	0.347842	1056.38	4.06545	0.00667953
11	0.347842	530.731	4.08094	-0.0243928
11	0.347842	1198.37	4.09965	0.0124061
11	0.347842	2832.08	4.05469	-0.0213407
11	0.347842	279.447	4.13247	0.0675704
11	0.347842	2857.74	4.05333	-0.0240031
11	0.347842	1003.21	4.11697	0.044688
11	0.347842	732.927	4.06526	0.00192268
11	0.347842	1079.99	4.0705	-0.00825938
11	0.347842	1024.21	4.09507	0.00638111
11	0.347842	1123.2	4.06963	-0.00822478
11	0.347842	835.907	4.1128	0.0214383
11	0.347842	3075.49	4.061	-0.0210495
11	0.347842	1516.01	4.10564	0.0325504
11	0.347842	1267.46	4.0828	0.0142191
11	0.347842	1130.79	4.09951	0.00388365
11	0.347842	1785.65	4.06901	-0.0185042
11	0.347842	1586.93	4.11394	0.0535643
11	0.347842	1308.49	4.08084	-0.00981389
11	0.347842	1080.04	4.10247	0.00674818
11	0.347842	2576.31	4.11066	0.0653385
11	0.347842	1098.92	4.09159	0.0312745
11	0.347842	1270.66	4.11549	0.0402575
11	0.347842	440.268	4.09436	0.0102529
11	0.347842	924.974	4.0979	0.0110819
11	0.347842	1786.95	4.11718	0.0597388
11	0.347842	421.824	4.10141	0.0319532
11	0.347842	777.627	4.1008	0.00684189
11	0.347842	1360.8	4.11613	0.0559319
11	0.347842	329.409	4.11169	0.0261103
11	0.347842	335.165	4.11363	0.0404362
11	0.347842	1207.95	4.10778	0.00577274
11	0.347842	562.878	4.09885	0.0548223
11	0.347842	463.954	4.11878	0.0213526
11	0.347842	550.014	4.11674	0.0378873
11	0.347842	1313.34	4.09466	0.0583135
11	0.347842	1180.12	4.11853	0.00548051
11	0.347842	326.299	4.10563	0.0306483
11	0.347842	1229.45	4.13887	0.0250569
11	0.347842	1462.84	4.08207	0.0476012
11	0.347842	700.367	4.09665	0.0472688
11	0.347842	776.377	4.13382	0.0100927
11	0.347842	1552.2	4.15462	0.0415195
11	0.347842	1381.41	4.09526	0.0454808
11	0.347842	904.285	4.14919	0.0233917
11	0.347842	1493.77	4.07156	0.0424524
11	0.347842	1427.44	4.16959	0.0509281
11	0.347842	1062.09	4.17455	0.0515574
11	0.347842	1582.3	4.0502	0.04796
11	0.347842	990.71	4.18065	0.0504967
11	0.347842	1686.2	4.02676	0.0267671
11	0.347842	806.451	4.18019	0.0556385
11	0.347842	1166.63	4.06196	0.0366432
11	0.347842	1193.04	3.97712	-0.0327432
11	0.347842	741.504	4.18401	0.0423695
11	0.347842	1300.59	4.04412	0.033643
11	0.347842	597.901	4.18616	0.0535073
11	0.347842	905.759	4.00606	-0.00865886
11	0.347842	560.256	4.18269	0.0301269
11	0.347842	553.061	3.962	-0.088671
11	0.347842	517.305	4.18855	0.0434998
11	0.347842	258.199	3.94306	-0.115436
11	0.347842	312.447	3.98935	-0.0479444
11	0.347842	479.782	4.18246	0.0232381
11	0.347842	87.7149	3.94451	-0.0768273
11	0.347842	541.739	4.1498	0.0037844
11	0.347842	153.076	3.95434	-0.109303
11	0.347842	111.748	3.94874	-0.0146357
11	0.347842	516.232	4.1693	0.00319862
11	0.347842	7.31087	3.9487	-0.102863
11	0.347842	583.036	4.1505	-0.0022481
11	0.347842	397.232	3.96557	-0.00286652
11	0.347842	36.3379	3.95546	-0.0439871
11	0.347842	531.63	4.15382	-0.00724767
11	0.347842	1020.37	4.15349	0.00778595
11	0.347842	73.9592	3.96446	0.00727815
11	0.347842	572.323	4.15135	0.0331171
11	0.347842	429.484	3.96926	0.0188635
11	0.347842	1122.88	4.15329	0.0206673
11	0.347842	484.815	3.97684	0.0422309
11	0.347842	611.639	4.13903	-0.00708234
11	0.347842	171.056	3.97365	0.0104979
11	0.347842	476.967	4.11957	-0.0160679
11	0.347842	457.659	3.98877	0.0749456
11	0.347842	779.102	4.14788	0.00723
11	0.347842	394.466	3.97724	0.0273006
11	0.347842	404.951	4.12541	-0.033431
11	0.347842	765.564	3.99149	0.0933393
11	0.347842	263.76	4.13124	9.30881e-05
11	0.347842	430.113	3.99471	0.0570195
11	0.347842	1435.26	3.97978	0.0299282
11	0.347842	266.321	4.12909	0.0415628
11	0.347842	226.26	4.12448	-0.0309676
11	0.347842	461.205	4.00916	0.0847009
11	0.347842	3364.7	3.95765	-0.0572089
11	0.347842	110.932	4.135	0.0217766
11	0.347842	640.941	4.00071	0.0630838
11	0.347842	175.304	4.12713	0.0450638
11	0.347842	4528.65	3.94357	-0.0761274
11	0.347842	141.946	4.10748	0.0770692
11	0.347842	2147.46	3.98574	0.0574999
11	0.347842	1577.64	3.98582	-0.00785562
11	0.347842	0.328969	4.12646	0.0309198
11	0.347842	72.0811	4.05221	0.00302357
11	0.347842	2456.4	3.97012	-0.0211161
11	0.347842	481.962	4.12547	0.0585888
11	0.347842	2042.93	3.9941	0.057135
11	0.347842	1907.91	4.02618	0.000576414
11	0.347842	3688.91	3.96495	-0.0540961
11	0.347842	2335.43	3.9639	-0.0667902
11	0.347842	120.161	4.09595	0.0560701
11	0.347842	1627.97	3.99911	0.058193
11	0.347842	1581.98	4.02179	0.0327956
11	0.347842	2074.88	3.98784	0.0188999
11	0.347842	254.473	4.03728	-0.0344914
11	0.347842	3185.22	3.97475	-0.0250979
11	0.347842	2200.18	3.97589	-0.0433696
11	0.347842	563.864	4.1237	0.0779939
11	0.347842	1452.95	4.01029	0.0857743
11	0.347842	1853.33	4.03126	0.0186741
11	0.347842	1855.53	3.98496	-0.0330648
11	0.347842	64.9242	4.07217	0.00825626
11	0.347842	1432.76	4.00914	0.0100624
11	0.347842	1476.28	4.00983	0.0601121
11	0.347842	679.983	4.03491	-0.0360246
11	0.347842	1690.84	3.98492	-0.0473539
11	0.347842	1059.34	4.03056	0.0295788
11	0.347842	1429.75	4.00695	0.0213675
11	0.347842	1465.33	3.99907	-0.00430802
12	0.382626	510.08	4.06319	0.0145466
12	0.382626	520.822	4.03741	-0.0141398
12	0.382626	374.201	4.08336	0.032608
12	0.382626	532.405	4.03925	-0.00908837
12	0.382626	977.725	4.08665	0.028064
12	0.382626	532.479	4.05475	-0.0116479
12	0.382626	4621.98	4.01722	-0.0379946
12	0.382626	399.232	4.09747	0.0372723
12	0.382626	520.4	4.04038	-0.0148751
12	0.382626	1218.48	4.08796	0.04401
12	0.382626	1253.09	4.03885	-0.00485792
12	0.382626	355.346	4.08	0.0165121
12	0.382626	875.795	4.03771	-0.0234323
12	0.382626	398.537	4.10004	0.0416755
12	0.382626	914.891	4.03593	-6.69906e-05
12	0.382626	540.685	4.0497	-0.0287175
12	0.382626	1223.96	4.08978	0.0424934
12	0.382626	4870.47	4.02819	-0.0307905
12	0.382626	317.854	4.10045	0.0422539
12	0.382626	454.204	4.04827	-0.0130288
12	0.382626	986.563	4.0953	0.0372978
12	0.382626	943.386	4.04772	0.00836217
12	0.382626	1446.62	4.07937	0.0387173
12	0.382626	2787.18	4.03441	-0.030768
12	0.382626	351.727	4.11182	0.0548289
12	0.382626	1998.41	4.03809	-0.0195355
12	0.382626	813.53	4.09947	0.0426079
12	0.382626	2199.69	4.04524	-0.0125591
12	0.382626	1764.27	4.04082	-0.0171894
12	0.382626	1125.57	4.07953	0.0340876
12	0.382626	1198.25	4.05198	0.00249844
12	0.382626	1310.71	4.09721	0.0388225
12	0.382626	3026.09	4.03949	-0.0258259
12	0.382626	1682.22	4.09247	0.0602834
12	0.382626	1311.81	4.05459	-0.00406573
12	0.382626	1108.93	4.08734	0.0252666
12	0.382626	3017.33	4.09911	0.0664554
12	0.382626	644.272	4.05836	0.0113948
12	0.382626	2126.26	4.05156	-0.0218547
12	0.382626	1342.28	4.09383	0.0214368
12	0.382626	3247.42	4.098	0.0706073
12	0.382626	1131.25	4.06503	0.0148361
12	0.382626	1549.14	4.10563	0.0516851
12	0.382626	570.988	4.06776	0.0053846
12	0.382626	625.456	4.09972	0.059306
12	0.382626	3317.77	4.10556	0.0687719
12	0.382626	575.476	4.07512	0.0223286
12	0.382626	630.159	4.07439	-0.0011876
12	0.382626	1697.33	4.10831	0.0572966
12	0.382626	454.298	4.08575	0.0168859
12	0.382626	277.158	4.10453	0.0652345
12	0.382626	1237.5	4.08144	-0.00385056
12	0.382626	750.841	4.09241	0.0781876
12	0.382626	1418.69	4.09399	0.00689708
12	0.382626	487.413	4.11485	0.0534468
12	0.382626	1457.24	4.08744	0.0670441
12	0.382626	1613.11	4.09102	-0.000993808
12	0.382626	395.893	4.10243	0.0606415
12	0.382626	1440.66	4.11216	0.0150203
12	0.382626	1498.44	4.06521	0.0570632
12	0.382626	1041.45	4.09444	0.0697318
12	0.382626	1270.4	4.10618	0.0038393
12	0.382626	1788.47	4.12416	0.0268852
12	0.382626	1577.42	4.0868	0.0557313
12	0.382626	1010.04	4.12452	0.011237
12	0.382626	1451.39	4.0588	0.0573165
12	0.382626	1893.17	4.13894	0.0365772
12	0.382626	1721.86	4.15058	0.0439234
12	0.382626	2004.26	4.04302	0.0681952
12	0.382626	1659.57	4.15495	0.0410892
12	0.382626	2356.06	4.02339	0.0495635
12	0.382626	1384.5	4.16176	0.0595273
12	0.382626	1640.15	4.05353	0.0578596
12	0.382626	2057.01	3.9761	-0.00140026
12	0.382626	1331.54	4.16758	0.0453817
12	0.382626	2111.82	4.03989	0.0524333
12	0.382626	1080.87	4.17205	0.0730345
12	0.382626	1907.57	4.00133	0.0135859
12	0.382626	1462.55	3.95649	-0.0523588
12	0.382626	744.727	4.18049	0.0817849
12	0.382626	364.893	4.16069	0.0594151
12	0.382626	932.791	3.94025	-0.0799625
12	0.382626	478.371	4.18266	0.0759595
12	0.382626	462.628	3.93743	-0.0384741
12	0.382626	474.357	4.15003	0.0286788
12	0.382626	795.965	3.94671	-0.101515
12	0.382626	632.901	3.93368	-0.0044438
12	0.382626	417.875	4.1765	0.0525441
12	0.382626	179.598	3.93995	-0.0899604
12	0.382626	627.761	4.14456	0.00804747
12	0.382626	1010.16	3.94295	-0.00209437
12	0.382626	607.608	4.15166	0.0669829
12	0.382626	258.478	3.9392	-0.031982
12	0.382626	425.566	4.16294	0.0238704
12	0.382626	567.619	4.1486	0.00921281
12	0.382626	430.208	3.95319	-0.0054637
12	0.382626	623.136	4.15993	0.0772071
12	0.382626	848.588	3.9555	0.00711421
12	0.382626	679.811	4.15684	0.0342484
12	0.382626	757.402	3.95191	0.0211696
12	0.382626	626.568	4.15973	0.0491145
12	0.382626	738.318	4.11062	-0.0049104
12	0.382626	945.508	3.95616	0.0296226
12	0.382626	682.171	4.16171	0.052736
12	0.382626	670.829	3.96527	0.0341141
12	0.382626	636.708	4.13561	0.0105262
12	0.382626	1925.32	3.95962	0.0780282
12	0.382626	650.248	4.11373	-0.0117577
12	0.382626	502.278	3.96806	0.0505072
12	0.382626	2947.62	3.95292	0.0346787
12	0.382626	793.14	4.12462	0.0521945
12	0.382626	583.563	4.11926	-0.0136633
12	0.382626	860.101	3.97526	0.0743152
12	0.382626	4641.65	3.93442	-0.0423135
12	0.382626	530.381	4.12352	0.00843524
12	0.382626	1686.45	3.97127	0.07825
12	0.382626	563.861	4.12525	0.0558077
12	0.382626	5481.04	3.91913	-0.0771387
12	0.382626	48.0403	4.09259	0.0702267
12	0.382626	3731.66	3.94014	0.0297108
12	0.382626	2838.14	3.95832	-0.0152178
12	0.382626	450.468	4.12929	0.0344037
12	0.382626	81.1479	4.04572	0.00549512
12	0.382626	3339.66	3.93716	-0.0384902
12	0.382626	71.093	4.12331	0.0635129
12	0.382626	3355.74	3.94909	0.0185465
12	0.382626	3030.02	4.01602	-0.000293466
12	0.382626	5063.98	3.93181	-0.0783966
12	0.382626	3995.46	3.93935	-0.0600335
12	0.382626	59.2375	4.0847	0.0536926
12	0.382626	2950.26	3.95617	0.0287313
12	0.382626	3204.69	4.01421	0.0737511
12	0.382626	3398.16	3.94642	-0.0234466
12	0.382626	301.357	4.03344	-0.00976822
12	0.382626	3976.36	3.93808	-0.0649689
12	0.382626	3475.15	3.96714	-0.00413235
12	0.382626	127.083	4.11621	0.0721838
12	0.382626	2816.84	3.96865	0.0453454
12	0.382626	3783.76	4.01834	0.0418057
12	0.382626	3254.16	3.94582	-0.064198
12	0.382626	67.5534	4.07164	0.0329038
12	0.382626	2357.26	3.96614	0.00240026
12	0.382626	2293.84	4.00821	0.0450931
12	0.382626	2626.91	3.97036	0.0197683
12	0.382626	999.894	4.02672	-0.00937056
12	0.382626	3006.64	3.95596	-0.0546002
12	0.382626	2664.05	4.02171	0.0506204
12	0.382626	2657.74	3.96447	-0.0299953
12	0.382626	2371.41	3.98601	-0.00639641
13	0.41741	790.252	4.0512	0.0439366
13	0.41741	1789.1	4.00921	-0.00283728
13	0.41741	573.549	4.02832	0.0224113
13	0.41741	588.027	4.06033	0.0361035
13	0.41741	1075.7	4.02387	0.019718
13	0.41741	1864.78	4.06941	0.0559129
13	0.41741	710.179	4.04816	0.0254893
13	0.41741	3386.22	4.00133	-0.0275224
13	0.41741	547.594	4.07189	0.0270056
13	0.41741	541.654	4.02813	0.0102078
13	0.41741	1826.21	4.06782	0.0576993
13	0.41741	2399.89	4.01721	-0.00132445
13	0.41741	533.933	4.06722	0.0320733
13	0.41741	971.623	4.02454	-0.00863167
13	0.41741	865.897	4.07763	0.0355099
13	0.41741	1331.28	4.01891	0.0324821
13	0.41741	534.021	4.04111	0.00068259
13	0.41741	1567.87	4.06241	0.0250734
13	0.41741	5213.2	4.00487	-0.0325986
13	0.41741	443.632	4.08249	0.0327423
13	0.41741	589.077	4.03334	0.0034109
13	0.41741	1785.41	4.07745	0.0452798
13	0.41741	1171.54	4.0302	0.0117229
13	0.41741	1622.4	4.04624	0.0296898
13	0.41741	2044.4	4.01955	-0.0314356
13	0.41741	467.639	4.0897	0.0320283
13	0.41741	1717.16	4.02154	0.00954383
13	0.41741	1102.5	4.07932	0.0346817
13	0.41741	3794.04	4.02023	-0.0229263
13	0.41741	2489.26	4.01803	-0.00394619
13	0.41741	1624.92	4.05319	0.036871
13	0.41741	1053.67	4.034	0.0156122
13	0.41741	1668.31	4.07112	0.0431864
13	0.41741	2611.86	4.02546	-0.01029
13	0.41741	2005.27	4.06916	0.0822314
13	0.41741	1830.37	4.02632	-0.00965566
13	0.41741	1221.85	4.06289	0.0364257
13	0.41741	4154.48	4.07615	0.10754
13	0.41741	954.037	4.02982	0.00492729
13	0.41741	2660.4	4.0288	-0.0188814
13	0.41741	1628.11	4.07489	0.0566271
13	0.41741	3695.96	4.0771	0.101922
13	0.41741	1250.56	4.03639	-0.00136737
13	0.41741	2344.9	4.08747	0.0847117
13	0.41741	763.453	4.04048	0.00467605
13	0.41741	1000.43	4.07377	0.0774882
13	0.41741	4179.6	4.08801	0.092063
13	0.41741	771.79	4.04681	0.0104005
13	0.41741	642.189	4.04781	0.00077515
13	0.41741	1898.5	4.08948	0.0624774
13	0.41741	1637.16	4.04587	0.000872173
13	0.41741	491.234	4.08415	0.0821563
13	0.41741	867.067	4.05413	-0.00502727
13	0.41741	837.37	4.07823	0.071615
13	0.41741	1609.23	4.06186	0.0077727
13	0.41741	1383.69	4.06406	0.061763
13	0.41741	1574.02	4.06302	-0.00573559
13	0.41741	514.36	4.0904	0.0803024
13	0.41741	1695.67	4.08064	0.01431
13	0.41741	1587.66	4.03962	0.061061
13	0.41741	1132.47	4.08259	0.0756503
13	0.41741	1676.31	4.07609	0.000190137
13	0.41741	2071.1	4.095	0.0212202
13	0.41741	1601.83	4.06669	0.0615596
13	0.41741	2855.61	4.10062	0.021458
13	0.41741	1348.32	4.04053	0.0656234
13	0.41741	2425.69	4.10511	0.0273645
13	0.41741	2567.4	4.11634	0.0281572
13	0.41741	1868.54	4.03332	0.0781518
13	0.41741	2390.07	4.12025	0.0289081
13	0.41741	2270.18	4.01248	0.0721049
13	0.41741	2217.68	4.13049	0.0437688
13	0.41741	1588.31	4.04153	0.0701076
13	0.41741	2349.21	3.97251	0.0227026
13	0.41741	2105.35	4.13671	0.0323704
13	0.41741	2246.7	4.03356	0.0724014
13	0.41741	1850.84	4.14432	0.0605706
13	0.41741	2374.47	3.99846	0.0404008
13	0.41741	1253.08	4.14156	0.0812325
13	0.41741	2252.46	3.9571	-0.0145548
13	0.41741	1436.43	4.15657	0.076874
13	0.41741	600.839	4.1435	0.0700175
13	0.41741	1824.22	3.94298	-0.0248219
13	0.41741	910.38	4.16402	0.0890779
13	0.41741	1471.01	3.93057	0.00669545
13	0.41741	423.164	4.13989	0.0444677
13	0.41741	1754.65	3.94672	-0.0529568
13	0.41741	1726.57	3.92434	0.0125332
13	0.41741	511.401	4.16571	0.0838812
13	0.41741	824.567	3.93771	-0.0352903
13	0.41741	594.753	4.13292	0.0204483
13	0.41741	2447.63	3.91648	0.0125552
13	0.41741	695.492	4.13322	0.0578278
13	0.41741	963.342	3.93141	0.00535684
13	0.41741	646.056	4.13291	0.0134943
13	0.41741	1290.42	3.9308	0.00257872
13	0.41741	728.788	4.14601	0.0907986
13	0.41741	1880.26	3.92834	-0.00192497
13	0.41741	621.045	4.14305	0.0323628
13	0.41741	1720.23	3.92256	-0.0175853
13	0.41741	758.354	4.15339	0.0882974
13	0.41741	1068.74	4.11222	0.0269353
13	0.41741	2363.83	3.9218	-0.0128021
13	0.41741	1284.06	3.94012	0.0026725
13	0.41741	770.744	4.14919	0.0551344
13	0.41741	4161.21	3.92859	0.0177049
13	0.41741	799.037	4.10628	-0.000883356
13	0.41741	1192.96	3.93697	-0.000701103
13	0.41741	5193.02	3.92685	0.0112052
13	0.41741	1100.29	4.11226	0.0579935
13	0.41741	764.959	4.12498	0.0200212
13	0.41741	2205.99	3.94118	0.0188959
13	0.41741	6154.75	3.90794	-0.0110878
13	0.41741	767.955	4.11127	-0.00120127
13	0.41741	3517.7	3.94485	0.0554492
13	0.41741	1028.74	4.11659	0.0666148
13	0.41741	6278.59	3.90362	-0.0382669
13	0.41741	156.927	4.07945	0.0679372
13	0.41741	5538.84	3.89944	-0.0145544
13	0.41741	4533.07	3.93218	-0.00309436
13	0.41741	814.135	4.11779	0.0283679
13	0.41741	61.9152	4.03173	0.00405764
[truncated: 2,257 more rows]

[truncated: 4 more sheets: 3 - S1b, 3 - S1c, 3-S1d, 3 - S1e]
