# Supplementary material for: Phagocytic ‘teeth’ and myosin-II ‘jaw’ power target constriction during phagocytosis
Source: eLife. 2021 Oct 28;10:e68627. doi: 10.7554/eLife.68627 (PMC8585483; doi:10.7554/eLife.68627)
Supplement: Figure 4—source data 1. [file elife-68627-fig4-data1.xlsx]

## Sheet: 4d
	Number of teeth per phagocytic cup					Tooth depth measured per tooth (mm)					Tooth diameter measured per tooth (mm)
	DMSO	CK666	Blebbistatin	SMIFH2		DMSO	CK666	Blebbistatin	SMIFH2		DMSO	CK666	Blebbistatin	SMIFH2
	4	0	0	3		0.0488197	0.0644801	0.0977084	0.103526		0.496487	0.60807	0.702138	0.60807
	7	1	6	2		0.153937	0.231421	0.0596762	0.186822		1.42605	1.13759	0.60807	1.21614
	6	2	5	4		0.075105	0.103423	0.272989	0.0636071		0.85994	0.60807	1.21614	1.46863
	6	0	8	5		0.0848025	0.192346	0.210729	0.0780761		0.555089	0.555089	0.65679	0.74473
	6	1	3	7		0.291816	0.0806657	0.106243	0.127623		1.90679	0.60807	1.40428	1.31358
	11	5	0	3		0.342136	0.215373	0.0986244	0.0923527		1.21614	0.555089	0.60807	0.65679
	0	0	1	4		0.280278	0.20355	0.22341	0.100716		1.08207	0.60807	0.555089	0.785015
	3	2	7	0		0.19885	0.147826	0.220656	0.107907		0.85994	0.85994	0.65679	1.02353
	9	0	8	10		0.0845767	0.117967	0.175724	0.0722855		0.785015	0.74473	0.60807	0.60807
	12	1	6	3		0.134686	0.10008	0.196285	0.144406		0.82333	0.74473	0.555089	0.992974
	11	1	6	1		0.167928	0.040048	0.21955	0.0691286		0.74473	0.496487	0.82333	0.74473
	7	1	5	3		0.224196	0.239362	0.205798	0.266337		1.05321	0.555089	1.13759	1.19053
	10	0	2	0		0.314679	0.132903	0.185485	0.214253		1.21614	0.496487	1.85768	0.895054
	10	0	0	14		0.203839	0.18146	0.114751	0.42878		0.895054	1.11018	0.60807	1.48946
	4	5	0	3		0.354416	0.207905	0.0881435	0.204007		1.31358	0.961443	1.13759	0.928842
	14	5	4	11		0.205866	0.240237	0.148966	0.117029		0.961443	1.13759	1.16436	1.13759
	13	0	11	11		0.174312	0.112176	0.105857	0.20121		0.82333	0.496487	0.992974	1.38216
	10	4	3	2		0.184197	0.098688	0.190538	0.132983		0.85994	0.555089	1.33683	1.35969
	17	0	1	1		0.164612	0.152884	0.202576	0.098978		0.82333	1.35969	0.702138	0.992974
	9	1	2	2		0.107534	0.192593	0.0447625	0.203848		0.60807	0.85994	0.555089	1.21614
	2	0	2	6		0.160853	0.196863	0.224163	0.294708		0.74473	1.28991	1.19053	1.33683
	8	0	4	14		0.0793654	0.0480751	0.220756	0.179422		0.785015	0.85994	0.785015	1.13759
	5	0	1	5		0.148639	0.129001	0.101945	0.0726718		0.74473	0.785015	1.02353	0.65679
	11	2	3	13		0.198175	0.174823	0.168113	0.140124		0.702138	0.961443	1.02353	0.895054
	11	2	7	0		0.0763252	0.104127	0.119359	0.082569		0.60807	0.961443	0.785015	0.85994
	12	1	0	2		0.0928465	0.124546	0.152328	0.407048		0.60807	0.702138	0.60807	1.19053
	12	2	4	11		0.247102	0.128471	0.242988	0.412587		1.24122	1.24122	0.85994	1.77281
	11	2	9	5		0.181439	0.138757	0.177956	0.212356		0.74473	0.85994	0.74473	0.961443
	11	4	2	10		0.142347	0.135915	0.134371	0.170132		1.40428	0.785015	0.895054	0.65679
	1	4	11	6		0.101509	0.13442	0.0693861	0.134357		0.60807	0.82333	0.702138	0.82333
	12	0	1	1		0.101362	0.135946	0.211296	0.203511		0.74473	0.702138	0.65679	1.31358
	9	1	10	22		0.210184	0.188539	0.111721	0.115623		1.24122	1.16436	0.702138	0.65679
	18	0	0	1		0.112767	0.0507151	0.166298	0.204084		0.496487	0.555089	0.496487	0.82333
	6	0	21	9		0.276574	0.113572	0.222249	0.213993		1.13759	0.555089	0.65679	0.85994
	22	0	0	0		0.184996	0.233384	0.202399	0.108789		0.928842	0.928842	0.82333	0.785015
	13	1	15	10		0.210016	0.156378	0.196824	0.143565		1.11018	0.496487	0.992974	0.82333
	13	1	2	12		0.0958776	0.275911	0.23987	0.189349		0.496487	1.05321	1.4475	1.08207
	6	0	9	4		0.133773	0.133649	0.150148	0.157196		1.19053	0.702138	0.496487	0.992974
	13	0	5	10		0.159482	0.121522	0.341795	0.321912		1.24122	0.65679	0.555089	1.16436
	14	5	8	5		0.0985633	0.139722	0.100275	0.12708		0.82333	1.11018	0.496487	0.496487
	10	1	2	8		0.215526	0.0820723	0.262006	0.174122		0.702138	0.992974	0.82333	0.74473
	11	2	2	9		0.114588	0.0616482	0.206821	0.274536		0.85994	0.702138	0.702138	1.02353
	15	0	14	15		0.186618	0.06518	0.17633	0.0804594		1.08207	0.60807	0.60807	0.961443
	18	10	3	26		0.0930112	0.0659922	0.154736	0.0644761		1.16436	0.555089	0.496487	0.496487
	10	11	3	5		0.0671673	0.304514	0.143914	0.173282		0.65679	0.74473	0.928842	0.555089
	8	3	2	2		0.235132	0.171814	0.0622819	0.247156		1.21614	1.13759	0.65679	1.13759
	15	1	13	2		0.265585	0.178573	0.0778355	0.210002		1.19053	0.65679	0.895054	1.05321
	7	1	19	8		0.140696	0.214681	0.0694898	0.119072		0.555089	0.60807	0.555089	0.65679
	5	5	11	7		0.308568	0.101274	0.0451767	0.22401		1.62784	0.85994	0.702138	1.40428
	4	0	4	12		0.272227	0.178746	0.107608	0.219759		1.02353	1.31358	0.60807	1.28991
	10	4	1	8		0.306281	0.0558975	0.336108	0.202128		1.16436	0.702138	1.31358	0.928842
	16	5	9	1		0.17412	0.288529	0.0619505	0.294865		0.895054	0.65679	0.496487	0.555089
	0	1	5	9		0.150137	0.30789	0.140979	0.115499		0.928842	0.785015	0.992974	0.82333
	18	3	0	10		0.138869	0.065069	0.127141	0.259148		0.785015	0.82333	0.555089	0.928842
	13	9	12	6		0.166438	0.204101	0.0712987	0.165219		0.555089	0.928842	0.60807	1.19053
	16	8	1			0.145123	0.176762	0.183309	0.0922628		1.6088	0.928842	0.555089	0.496487
	15	0	1			0.0399549	0.207959	0.0953018	0.06877		0.496487	1.24122	0.60807	1.64666
	10	2	1			0.0932128	0.351109	0.141668	0.109009		0.702138	1.40428	0.60807	0.82333
	11	6	2			0.0973019	0.190419	0.166679	0.120419		0.992974	1.13759	0.928842	0.60807
	10	3	4			0.0817508	0.11912	0.248584	0.114217		0.496487	1.2658	0.60807	0.928842
	16	4	0			0.0958883	0.217151	0.241213	0.161624		0.992974	1.28991	0.496487	0.496487
	21	2	0			0.0952305	0.408489	0.182693	0.245758		0.74473	2.0014	1.31358	1.42605
	14	3	23			0.103311	0.25364	0.132594	0.0450606		0.65679	1.8742	1.02353	0.928842
	14		2			0.13893	0.18324	0.0325161	0.186808		0.82333	1.7377	1.05321	1.11018
	21		9			0.223488	0.165813	0.141936	0.0778529		1.08207	1.40428	1.21614	1.05321
	14		5			0.174527	0.11832	0.112189	0.221906		0.785015	0.928842	0.74473	0.60807
	7		4			0.258613	0.0755523	0.221721	0.209657		1.55028	0.555089	1.42605	0.74473
	8		11			0.0927181	0.131712	0.347992	0.141032		0.928842	0.496487	1.51001	0.85994
			2			0.182699	0.103787	0.170206	0.16307		1.4475	0.85994	1.4475	1.08207
			6			0.0863135	0.116191	0.149641	0.110426		1.31358	0.496487	1.51001	0.702138
			3			0.131392	0.0762513	0.120254	0.125959		0.74473	1.38216	1.46863	1.40428
			8			0.10276	0.110208	0.197861	0.20137		0.74473	1.28991	1.31358	1.19053
			3			0.060782	0.109979	0.180967	0.104993		0.65679	1.11018	0.60807	0.785015
						0.159472	0.170184	0.0816556	0.192655		0.928842	1.08207	0.65679	1.75535
						0.205913	0.108522	0.118943	0.155865		0.928842	0.555089	0.555089	2.5316
						0.0807742	0.11974	0.18066	0.0840553		0.65679	0.992974	1.33683	1.28991
						0.0716789	0.138088	0.14138	0.223852		0.785015	1.05321	0.82333	0.85994
						0.0730338	0.136144	0.125799	0.054547		0.85994	1.16436	0.65679	0.82333
						0.180022	0.12673	0.1287	0.0855764		1.19053	0.895054	0.65679	0.82333
						0.166071	0.116026	0.214005	0.198273		1.16436	0.496487	0.961443	1.35969
						0.105762	0.12443	0.102807	0.162371		1.02353	1.11018	0.702138	1.70187
						0.0806127	0.197239	0.14079	0.145288		0.496487	0.555089	0.85994	0.496487
						0.214042	0.305845	0.197108	0.145878		1.51001	0.496487	2.04707	0.555089
						0.106474	0.177975	0.0823602	0.176436		1.08207	0.702138	0.702138	1.11018
						0.174569	0.133043	0.0884882	0.120112		0.74473	0.60807	0.74473	0.65679
						0.209316	0.18137	0.374456	0.132415		1.08207	1.40428	0.65679	0.82333
						0.0874847	0.175201	0.242974	0.136374		0.555089	0.60807	0.555089	0.496487
						0.140302	0.15136	0.190645	0.112184		0.702138	0.60807	0.65679	0.992974
						0.112027	0.212633	0.0403055	0.105059		1.21614	0.496487	0.60807	0.65679
						0.146155	0.214238	0.201904	0.0675914		0.82333	1.40428	1.24122	0.82333
						0.101319	0.387244	0.132453	0.128357		1.11018	0.496487	0.60807	0.961443
						0.215824	0.172682	0.250415	0.165043		1.42605	1.02353	0.961443	1.02353
						0.0944915	0.203474	0.10979	0.273093		0.65679	1.64666	0.82333	1.19053
						0.094551	0.276646	0.153021	0.0765662		1.7377	1.66527	1.13759	0.785015
						0.129852	0.109968	0.0685823	0.155042		1.2658	1.19053	0.65679	1.75535
						0.169671	0.0790273	0.27691	0.134625		0.65679	0.85994	1.31358	0.961443
						0.248644	0.126308	0.217718	0.11295		1.19053	1.53028	0.992974	0.74473
						0.380456	0.15276	0.147436	0.128276		1.62784	1.19053	0.82333	1.42605
						0.233706	0.156681	0.283888	0.0692293		1.11018	0.895054	0.702138	0.785015
						0.293143	0.167906	0.145221	0.159647		2.0014	0.961443	0.65679	1.05321
						0.298445	0.2419	0.205375	0.227761		1.66527	1.4475	1.46863	1.16436
						0.25565	0.236035	0.112041	0.150949		1.48946	0.82333	0.702138	0.555089
						0.115106	0.124672	0.0933416	0.28723		1.57003	0.496487	0.82333	1.31358
						0.187096	0.243354	0.0815422	0.19711		1.21614	1.4475	0.60807	0.85994
						0.137112	0.17028	0.1072	0.226059		0.85994	0.895054	0.785015	0.992974
						0.188445	0.1523	0.143961	0.176152		1.53028	1.24122	1.24122	1.38216
						0.260882	0.196068	0.169948	0.15648		0.895054	1.57003	0.82333	1.68367
						0.291561	0.0341767	0.132068	0.137598		1.19053	0.74473	0.74473	1.08207
						0.119353	0.197251	0.120471	0.178049		1.38216	0.85994	0.555089	1.13759
						0.112577	0.287427	0.208737	0.182112		0.496487	1.02353	0.895054	1.11018
						0.183168	0.149631	0.302343	0.129048		0.961443	0.702138	1.71988	0.496487
						0.195812	0.193017	0.151085	0.105656		0.785015	0.992974	0.496487	0.555089
						0.284856	0.200638	0.158415	0.188606		1.05321	0.65679	1.70187	0.65679
						0.160693	0.24724	0.147077	0.216664		0.555089	1.13759	1.24122	0.702138
						0.157298	0.248405	0.4518	0.251418		0.496487	1.28991	1.97037	1.7377
						0.182215	0.20046	0.433839	0.21144		1.31358	0.785015	1.21614	1.33683
						0.159796	0.152993	0.410215	0.158695		1.24122	1.38216	1.21614	1.21614
						0.0740487	0.195022	0.280878	0.120023		0.60807	0.785015	1.46863	0.82333
						0.346608	0.0855357	0.125638	0.454918		1.38216	0.895054	1.13759	1.28991
						0.209879	0.138259	0.120432	0.132067		0.65679	1.31358	1.42605	1.05321
						0.117283	0.203309	0.235076	0.147256		1.24122	0.496487	1.62784	0.785015
						0.086964	0.13523	0.230876	0.240963		0.992974	0.74473	0.60807	1.38216
						0.144621	0.102759	0.249304	0.221027		1.31358	0.992974	0.74473	1.48946
						0.121268	0.0435306	0.263698	0.185165		0.702138	0.65679	0.928842	0.992974
						0.173122	0.264876	0.0626019	0.166596		1.28991	1.77281	0.555089	0.82333
						0.220452	0.157424	0.326822	0.195873		1.71988	1.11018	1.28991	1.42605
						0.284498	0.137652	0.236699	0.173294		0.961443	1.05321	1.13759	1.55028
						0.13728	0.101712	0.228085	0.140012		0.82333	0.496487	0.895054	0.65679
						0.138322	0.0545457	0.307956	0.2345		0.702138	0.555089	2.06206	1.51001
						0.193966	0.17056	0.134747	0.129892		0.961443	0.85994	1.08207	1.13759
						0.0939233	0.0968381	0.251779	0.149612		1.05321	0.702138	2.03196	1.4475
						0.162255	0.0860441	0.252906	0.305551		1.31358	0.702138	1.51001	1.8742
						0.157805	0.115051	0.353538	0.106727		1.33683	0.496487	1.48946	0.928842
						0.082514	0.168602	0.264139	0.205944		0.82333	0.85994	0.928842	1.02353
						0.124641	0.150701	0.41073	0.345645		0.702138	1.6088	1.8742	1.28991
						0.0982867	0.17964	0.176255	0.198888		0.65679	0.702138	0.496487	1.24122
						0.179949	0.153335	0.432469	0.349933		1.02353	0.928842	1.85768	1.8742
						0.238597	0.152531	0.469605	0.312758		0.785015	0.555089	2.13547	1.51001
						0.2243		0.452616	0.110223		0.702138		1.02353	0.496487
						0.161726		0.237723	0.0752979		0.82333		1.33683	1.11018
						0.180707		0.0272271	0.152909		0.961443		0.928842	0.65679
						0.129442		0.145175	0.339314		0.992974		1.08207	1.02353
						0.0669355		0.251294	0.266132		0.895054		1.80724	1.02353
						0.195531		0.115451	0.138879		0.82333		0.82333	0.82333
						0.167994		0.333141	0.164867		0.785015		1.48946	1.33683
						0.255022		0.21493	0.148085		0.702138		0.74473	0.74473
						0.24443		0.356082	0.108141		0.555089		1.11018	1.05321
						0.140034		0.550953	0.145141		0.74473		1.90679	0.60807
						0.413398		0.458872	0.186096		1.08207		0.82333	1.31358
						0.219306		0.714027	0.164545		1.28991		1.80724	0.555089
						0.240528		0.770452	0.150594		1.6088		2.6036	1.16436
						0.282099		0.341187	0.196897		1.55028		1.89057	2.0014
						0.175687		0.220601	0.0565532		1.2658		0.85994	1.28991
						0.123421		0.771561	0.0866854		0.928842		2.54374	0.555089
						0.119054		0.175459	0.208616		1.16436		1.4475	1.24122
						0.0517895		0.131842	0.124432		0.85994		0.702138	0.60807
						0.235657		0.368985	0.21164		0.785015		1.21614	1.21614
						0.454065		0.170221	0.0911719		1.2658		0.928842	0.496487
						0.102081		0.399925	0.228877		0.496487		0.85994	0.85994
						0.195579		0.468803	0.218475		0.895054		1.51001	0.496487
						0.194903		0.317808	0.18714		0.85994		1.21614	0.961443
						0.241829		0.298663	0.19683		0.992974		0.555089	0.85994
						0.0840281		0.160978	0.167358		0.928842		0.555089	0.82333
						0.16521		0.321961	0.228858		0.74473		1.48946	1.05321
						0.126537		0.193193	0.400127		1.05321		1.66527	0.961443
						0.230082		0.19842	0.284194		1.02353		1.79011	0.60807
						0.206028		0.18946	0.215273		1.08207		1.58953	1.08207
						0.201362		0.283989	0.336451		0.961443		0.82333	0.555089
						0.197539		0.128143	0.152342		0.895054		0.785015	0.85994
						0.196006		0.22548	0.168461		0.496487		0.555089	0.74473
						0.253244		0.206676	0.0632671		0.74473		1.13759	0.702138
						0.228262		0.120845	0.117912		1.19053		1.05321	0.785015
						0.105567		0.223199	0.244845		1.48946		1.57003	1.24122
						0.237263		0.16486	0.0753149		0.82333		0.74473	0.82333
						0.248776		0.163066	0.190401		1.19053		0.60807	1.05321
						0.302925		0.171586	0.134862		1.42605		0.82333	1.08207
						0.0306454		0.0533446	0.199738		0.60807		0.555089	1.11018
						0.166706		0.3429	0.18752		0.65679		2.23419	0.992974
						0.205248		0.207829	0.649001		0.785015		1.11018	1.2658
						0.276343		0.170573	0.220888		1.24122		0.555089	0.928842
						0.17134		0.26723	0.0590448		0.60807		0.60807	0.82333
						0.293547		0.114206	0.194291		1.11018		0.82333	0.555089
						0.132759		0.194853	0.134854		0.928842		0.702138	0.555089
						0.0927569		0.286561	0.227415		0.785015		1.16436	1.57003
						0.112437		0.212567	0.0813404		0.82333		1.31358	1.02353
						0.138048		0.386893	0.134602		0.702138		0.555089	0.702138
						0.0740524		0.413214	0.187141		1.02353		0.928842	0.82333
						0.0789647		0.286088	0.218157		0.496487		0.785015	0.60807
						0.105709		0.21278	0.268965		0.85994		0.85994	1.2658
						0.0436701		0.547716	0.281192		0.85994		1.48946	0.961443
						0.138258		0.378117	0.203996		1.19053		0.895054	1.08207
						0.128857		0.325689	0.0629544		1.11018		1.16436	0.60807
						0.239122		0.178216	0.323695		1.19053		0.928842	0.895054
						0.221558		0.206676	0.117256		0.992974		1.31358	1.16436
						0.250734		0.143589	0.0932085		0.85994		0.60807	1.02353
						0.215307		0.197549	0.13473		0.961443		0.496487	1.11018
						0.196329		0.174596	0.0959573		0.65679		1.16436	0.65679
						0.137591		0.06624	0.10798		0.82333		1.21614	0.82333
						0.255226		0.111052	0.136051		1.31358		1.6088	1.51001
						0.298361		0.312916	0.330637		0.85994		1.48946	1.31358
						0.186601		0.107473	0.258714		0.85994		0.895054	1.05321
						0.208148		0.179012	0.150858		0.992974		1.08207	1.08207
						0.184792		0.206958	0.0857992		1.51001		1.31358	0.895054
						0.223045		0.0806378	0.0873116		1.24122		0.74473	0.496487
						0.088464		0.122616	0.2458		1.05321		0.65679	1.85768
						0.110681		0.074482	0.309902		0.65679		0.895054	1.82421
						0.26701		0.118143	0.295159		0.85994		0.82333	1.33683
						0.327601		0.185439	0.141987		1.08207		1.53028	1.05321
						0.111884		0.189055	0.296621		0.65679		1.46863	1.8742
						0.149318		0.281783	0.161951		1.16436		0.60807	0.82333
						0.148867		0.210065	0.284254		1.4475		0.555089	0.992974
						0.141131		0.176002	0.190583		0.74473		1.02353	1.05321
						0.211414		0.206827	0.294511		1.19053		0.895054	0.702138
						0.183448		0.262464	0.283156		0.992974		0.496487	1.84102
						0.155904		0.151399	0.272482		0.82333		0.65679	1.16436
						0.13706		0.19695	0.223818		1.08207		0.496487	1.79011
						0.200233		0.0866454	0.147552		1.16436		0.702138	0.496487
						0.251316		0.0762141	0.198882		0.785015		0.555089	0.555089
						0.235153		0.192847	0.352825		1.13759		0.785015	1.24122
						0.221712		0.125779	0.285084		1.21614		0.496487	0.496487
						0.136989		0.186326	0.19682		0.82333		0.961443	1.08207
						0.11737		0.113776	0.0844775		0.961443		0.555089	0.65679
						0.113122		0.150764	0.0849751		0.496487		1.05321	0.65679
						0.248496		0.243675	0.254429		1.08207		1.35969	1.05321
						0.130042		0.389315	0.327482		0.496487		0.785015	0.895054
						0.13049		0.352089	0.213613		0.785015		1.05321	0.961443
						0.213957		0.161859	0.335456		1.48946		0.702138	0.82333
						0.173187		0.357016	0.269586		1.53028		1.62784	0.785015
						0.212846		0.255125	0.175073		0.555089		1.2658	0.702138
						0.0897664		0.21129	0.34978		1.02353		1.35969	0.992974
						0.130673		0.218745	0.174774		1.08207		0.60807	1.28991
						0.128039		0.0983729	0.0703333		1.08207		0.555089	1.13759
						0.104675		0.0506576	0.135247		0.555089		0.85994	0.85994
						0.268099		0.11779	0.20761		0.65679		0.60807	1.13759
						0.259775		0.0870639	0.131942		0.65679		1.05321	0.496487
						0.0944798		0.0828778	0.105158		0.555089		1.35969	0.60807
						0.125429		0.158638	0.111829		0.60807		1.05321	1.31358
						0.126944		0.157796	0.361822		0.74473		1.28991	2.30211
						0.12721		0.186055	0.234884		0.496487		0.555089	1.4475
						0.124747		0.115848	0.186636		0.74473		1.2658	0.60807
						0.0899921		0.17287	0.271764		0.702138		0.65679	1.2658
						0.0887329		0.215572	0.212747		1.02353		1.24122	1.19053
						0.134252		0.127531	0.225729		0.82333		0.555089	1.19053
						0.212161		0.141341	0.186032		1.46863		1.33683	0.992974
						0.331713		0.166146	0.0250585		1.75535		0.555089	1.28991
						0.278844		0.0615004	0.234097		1.35969		1.31358	1.42605
						0.20468		0.077242	0.135368		1.19053		0.65679	0.496487
						0.181055		0.0642144	0.121419		1.13759		0.992974	0.555089
						0.195666		0.233662	0.172381		0.928842		1.79011	1.2658
						0.18393		0.123941	0.163302		0.895054		0.555089	1.28991
						0.107156		0.155262	0.155522		0.928842		1.31358	1.42605
						0.178977		0.155028	0.0969052		1.40428		2.14985	0.702138
						0.113669		0.147036	0.0837137		0.702138		0.82333	0.961443
						0.13067		0.130759	0.175164		0.555089		0.85994	1.51001
						0.0589032		0.147009	0.140143		0.555089		0.785015	1.66527
						0.0894345		0.124005	0.204923		1.31358		1.13759	1.66527
						0.0946729		0.189616	0.329628		0.85994		0.895054	1.21614
						0.129681		0.177206	0.288629		0.895054		1.79011	1.13759
						0.239289		0.278013	0.145911		1.70187		2.03196	0.496487
						0.173007		0.331371	0.147946		1.21614		1.77281	1.31358
						0.207358		0.213481	0.232545		1.38216		0.785015	0.65679
						0.111383		0.201827	0.307936		0.60807		1.16436	1.35969
						0.0835501		0.0747027	0.331125		0.555089		0.555089	1.53028
						0.127714		0.126375	0.378845		1.05321		0.65679	1.35969
						0.140985		0.117675	0.224682		0.928842		0.496487	1.24122
						0.236495		0.22706	0.191284		1.64666		0.928842	1.16436
						0.300336		0.187322	0.152203		1.85768		0.82333	2.34192
						0.352583		0.192656	0.359415		1.85768		1.21614	0.65679
						0.266036		0.393751	0.879437		1.51001		1.58953	2.28869
						0.339143		0.202173	0.594203		1.62784		0.65679	1.16436
						0.451852		0.398619	0.692266		1.42605		1.40428	1.92289
						0.340131		0.343726	0.0972152		1.57003		1.55028	0.992974
						0.218426		0.164126	0.182047		1.02353		1.05321	0.928842
						0.301498		0.105043	0.209605		1.77281		1.28991	1.24122
						0.166307		0.211251	0.18293		1.42605		0.555089	0.992974
						0.13695		0.221129	0.317901		1.02353		0.496487	1.08207
						0.162372		0.258388	0.216816		1.4475		0.785015	0.895054
						0.135278		0.150507	0.392985		1.85768		0.496487	0.785015
						0.351891		0.238303	0.225137		1.38216		0.961443	0.60807
						0.163781		0.231998	0.446429		0.895054		0.74473	0.928842
						0.228683		0.0916636	0.248065		1.08207		0.555089	0.496487
						0.324334		0.325919	0.251705		1.05321		1.13759	0.496487
						0.238562		0.204746	0.498421		1.21614		1.24122	1.79011
						0.264143		0.0992982	0.315635		1.19053		0.928842	0.895054
						0.232383		0.246048	0.136563		1.24122		0.555089	0.65679
						0.053793		0.221715	0.25835		1.35969		0.60807	1.38216
						0.118549		0.735951	0.336386		0.702138		1.93884	2.0014
						0.249342		0.374277	0.304419		0.555089		1.2658	0.702138
						0.162705		0.214218	0.342289		1.13759		0.82333	1.02353
						0.228682		0.107782	0.135433		1.7377		0.785015	1.51001
						0.0957526		0.103852	0.308259		1.02353		1.35969	1.05321
						0.153512		0.304419	0.315635		0.65679		0.60807	1.2658
						0.301827		0.290673	0.328969		1.19053		0.60807	0.65679
						0.186026		0.152192	0.329101		0.702138		1.05321	0.82333
						0.40341		0.280015	0.370057		1.2658		0.85994	0.785015
						0.311872		0.306266	0.384607		0.961443		0.555089	1.05321
						0.118458		0.274137	0.274854		0.60807		0.702138	0.65679
						0.252566		0.148609	0.252776		0.555089		0.85994	0.496487
						0.308175		0.205394	0.230633		1.80724		1.24122	1.02353
						0.303306		0.226371	0.202716		0.702138		1.42605	0.65679
						0.350194		0.198992	0.165042		0.74473		1.38216	0.496487
						0.27878		0.196666	0.258667		1.48946		1.16436	1.4475
						0.110206		0.324288	0.148049		0.895054		1.66527	0.555089
						0.115213		0.350189	0.229754		0.702138		1.51001	1.21614
						0.0774614		0.218131	0.163132		0.85994		1.31358	0.555089
						0.0949634		0.129718	0.151872		1.05321		0.555089	0.74473
						0.196067		0.1662	0.201412		1.48946		1.16436	0.85994
						0.266042		0.145326	0.189622		1.13759		0.82333	0.895054
						0.136991		0.104099	0.187046		0.555089		0.496487	0.555089
						0.451769		0.148924	0.229394		1.79011		0.895054	0.82333
						0.749118		0.157812	0.0839595		1.24122		1.28991	1.75535
						0.755075		0.0305236	0.195387		1.40428		0.496487	1.11018
						0.268675		0.137512	0.278977		1.38216		1.28991	1.51001
						0.489587		0.252931	0.269568		0.992974		1.16436	1.68367
						0.565072		0.0982435	0.309339		0.961443		0.992974	1.31358
						0.81167		0.253031	0.253204		1.85768		0.555089	1.13759
						0.164856		0.235168	0.274148		1.19053		1.35969	1.11018
						0.0941749		0.2242	0.32106		0.961443		0.961443	1.02353
						0.314146		0.149561	0.288996		0.65679		0.928842	1.19053
						0.288234		0.126219	0.222461		1.53028		0.82333	1.4475
						0.289559		0.175484	0.141685		1.24122		0.85994	1.13759
						0.3997		0.10363	0.046989		1.46863		1.31358	0.496487
						0.271777		0.109816	0.0462377		0.60807		0.496487	0.74473
						0.20463		0.18879	0.0443957		1.28991		1.13759	0.496487
						0.131534		0.265326	0.102756		1.57003		1.35969	0.555089
						0.20558		0.0925884	0.141097		1.2658		0.65679	0.555089
						0.170698		0.406843	0.303988		0.496487		1.64666	1.35969
						0.230814		0.306233	0.378589		0.74473		1.24122	1.57003
						0.228331		0.269539	0.300144		0.74473		1.13759	1.11018
						0.284249		0.233452	0.270104		1.79011		1.05321	1.46863
						0.23028		0.14441	0.157711		0.85994		1.05321	1.75535
						0.173542		0.237737	0.0813094		1.28991		1.11018	0.785015
						0.316671		0.304376	0.130018		0.496487		0.74473	0.895054
						0.121073		0.142008	0.168988		1.31358		1.02353	0.961443
						0.262114		0.12152	0.147581		1.80724		0.961443	0.555089
						0.253089		0.135238	0.144489		1.21614		0.785015	1.11018
						0.271954		0.120971	0.322105		1.53028		0.928842	1.84102
						0.229223		0.11196	0.158507		1.21614		1.16436	0.496487
						0.125832		0.110025	0.233818		0.555089		0.74473	0.82333
						0.186451		0.235921	0.381292		1.11018		1.31358	1.71988
						0.182716		0.495609	0.576021		0.702138		1.24122	1.8742
						0.24151		0.358703	0.59753		1.19053		1.11018	1.84102
						0.26662		0.428121	0.402633		1.05321		1.82421	1.19053
						0.222006		0.333697	0.343237		0.961443		0.555089	1.28991
						0.229645		0.251806	0.335096		0.555089		1.19053	1.6088
						0.15995		0.251212	0.301196		1.08207		1.48946	0.82333
						0.106052		0.149593	0.268207		0.60807		1.11018	0.60807
						0.167151		0.0517496	0.13591		0.496487		0.702138	1.58953
						0.153024		0.37223	0.318635		0.74473		0.85994	1.35969
						0.204685		0.162286	0.73406		1.21614		0.496487	3.51946
						0.129508		0.563463	0.38611		0.785015		0.785015	0.555089
						0.0976603		0.440895	0.506437		1.08207		1.46863	2.04707
						0.217642		0.337668	0.220344		1.13759		1.08207	0.60807
						0.142116		0.26702	0.293169		1.21614		0.961443	1.08207
						0.157389		0.140573	0.545752		1.02353		1.2658	1.70187
						0.0856528		0.0566636	0.324956		0.555089		0.496487	0.60807
						0.121286		0.16585	0.484244		1.05321		0.74473	1.51001
						0.0479464		0.29765	0.169806		1.02353		1.48946	0.82333
						0.206662		0.381732	0.195384		1.16436		1.75535	1.55028
						0.249117		0.22511	0.347615		1.42605		1.2658	1.02353
						0.210271		0.264002	0.12706		0.928842		1.71988	1.02353
						0.106571		0.0780796	0.360584		0.82333		1.11018	1.58953
						0.211302		0.131738	0.326251		1.11018		0.85994	0.65679
						0.0981607		0.347993			0.785015		0.60807
						0.122193		0.224166			0.928842		0.785015
						0.0711016		0.25671			0.65679		0.702138
						0.0443921		0.535283			0.961443		1.35969
						0.0883465		0.555947			1.28991		0.895054
						0.19379		0.49206			1.62784		1.7377
						0.325148		0.395908			1.8742		1.13759
						0.281256		0.303313			0.961443		1.24122
						0.39136		0.267936			1.05321		1.16436
						0.223367		0.410588			1.68367		0.555089
						0.0255371		0.457147			0.65679		0.496487
						0.0997778		0.228857			0.961443		0.555089
						0.141692		0.305478			0.496487		0.85994
						0.217226		0.291331			1.98595		0.785015
						0.127435					1.05321
						0.130531					0.992974
						0.157611					0.555089
						0.110452					0.992974
						0.0699342					0.785015
						0.0713997					0.65679
						0.23854					1.28991
						0.0849509					0.82333
						0.13785					0.65679
						0.301078					0.961443
						0.260584					1.21614
						0.247051					1.21614
						0.220894					1.02353
						0.169926					0.65679
						0.201586					1.68367
						0.1361					0.60807
						0.167087					1.21614
						0.158798					1.19053
						0.103381					0.555089
						0.228453					1.38216
						0.228309					1.40428
						0.250896					1.2658
						0.12462					1.02353
						0.157334					1.28991
						0.130168					1.11018
						0.189773					1.31358
						0.21653					1.80724
						0.0399526					0.74473
						0.155766					1.46863
						0.328499					1.19053
						0.245732					1.68367
						0.238794					1.55028
						0.26214					0.928842
						0.253301					1.05321
						0.16874					1.05321
						0.205228					0.895054
						0.255976					0.992974
						0.203537					1.85768
						0.220014					1.46863
						0.0973101					0.85994
						0.0911522					0.702138
						0.0574491					0.785015
						0.18278					1.40428
						0.170173					0.895054
						0.0866765					0.555089
						0.226464					1.42605
						0.205166					1.05321
						0.237259					1.64666
						0.223672					1.2658
						0.137204					1.08207
						0.162546					1.53028
						0.150235					1.24122
						0.145173					0.961443
						0.162077					0.895054
						0.150044					0.85994
						0.219879					0.65679
						0.195389					1.13759
						0.157793					0.74473
						0.0964355					1.33683
						0.0508791					0.74473
						0.195249					1.35969
						0.25594					1.46863
						0.207461					1.35969
						0.113036					0.895054
						0.176416					1.08207
						0.254725					1.89057
						0.175308					0.895054
						0.217817					0.702138
						0.357181					0.961443
						0.093998					0.785015
						0.13641					1.08207
						0.217901					1.2658
						0.222835					1.16436
						0.257191					1.40428
						0.138331					0.961443
						0.19289					1.24122
						0.135777					2.12099
						0.067502					0.65679
						0.126336					0.928842
						0.225245					1.8742
						0.144855					0.65679
						0.0809621					1.08207
						0.15474					0.555089
						0.201597					0.702138
						0.162158					1.2658
						0.0883447					0.928842
						0.137074					1.02353
						0.118383					1.31358
						0.125381					0.992974
						0.269307					0.555089
						0.208989					0.702138
						0.171625					0.555089
						0.152343					0.65679
						0.185619					0.60807
						0.219109					0.82333
						0.19434					0.82333
						0.155871					0.961443
						0.0632793					0.496487
						0.36797					0.895054
						0.1998					1.11018
						0.0758603					1.02353
						0.260618					1.38216
						0.0954414					0.74473
						0.10957					0.65679
						0.259183					1.58953
						0.214296					0.555089
						0.258129					0.496487
						0.0751402					0.65679
						0.131884					1.35969
						0.21962					1.13759
						0.182262					0.555089
						0.032256					0.555089
						0.177354					0.82333
						0.124253					0.785015
						0.0683927					0.65679
						0.240827					1.13759
						0.209803					1.16436
						0.274833					0.928842
						0.259011					1.28991
						0.2728					0.82333
						0.2463					1.28991
						0.230072					1.02353
						0.0589471					0.65679
						0.27083					0.496487
						0.322872					1.31358
						0.266896					0.555089
						0.266531					0.992974
						0.278665					1.21614
						0.333866					1.51001
						0.338937					1.33683
						0.266156					1.11018
						0.168231					0.496487
						0.24169					1.16436
						0.11544					1.24122
						0.117168					0.60807
						0.0486242					0.702138
						0.160564					0.702138
						0.113801					1.35969
						0.140783					1.38216
						0.268777					1.11018
						0.100095					0.74473
						0.149877					0.85994
						0.12504					0.555089
						0.0716603					0.555089
						0.0813668					0.74473
						0.107043					0.82333
						0.0928369					1.16436
						0.200472					1.05321
						0.286367					1.11018
						0.436437					0.60807
						0.412653					0.785015
						0.226008					0.82333
						0.429997					0.961443
						0.263073					0.82333
						0.3111					1.66527
						0.292595					0.992974
						0.365921					1.08207
						0.428775					1.02353
						0.373791					1.64666
						0.348513					2.04707
						0.390802					1.68367
						0.519043					1.48946
						0.323151					0.928842
						0.111727					0.702138
						0.089512					0.496487
						0.283585					1.02353
						0.18473					0.65679
						0.236275					1.77281
						0.159476					1.2658
						0.267393					0.60807
						0.30271					1.19053
						0.322691					1.08207
						0.157064					1.24122
						0.0758333					0.555089
						0.380783					0.702138
						0.228824					1.62784
						0.260141					0.928842
						0.149242					1.4475
						0.332999					0.992974
						0.202521					0.992974
						0.194546					1.42605
						0.366858					0.65679
						0.337084					1.62784
						0.284408					1.46863
						0.220385					1.51001
						0.247012					1.77281
						0.362531					1.16436
						0.227744					0.702138
						0.21355					0.702138
						0.450653					1.40428
						0.242772					0.785015
						0.460159					1.13759
						0.203543					0.496487
						0.169542					0.961443
						0.166788					1.08207
						0.15086					1.05321
						0.120447					0.961443
						0.115401					0.785015
						0.112528					1.02353
						0.34465					1.7377
						0.132313					0.785015
						0.204556					1.31358
						0.119219					0.555089
						0.121233					1.35969
						0.226837					1.24122
						0.219419					1.28991
						0.144586					1.13759
						0.151015					0.992974
						0.21763					1.66527
						0.18249					1.31358
						0.0850498					0.60807
						0.0738351					1.58953
						0.111383					0.928842
						0.0829979					0.65679
						0.113945					1.02353
						0.0879573					0.992974
						0.0591328					0.82333
						0.211069					1.53028
						0.162247					1.19053
						0.155812					0.74473
						0.114334					1.08207
						0.105493					0.555089
						0.140996					0.928842
						0.176531					1.40428
						0.07151					1.02353
						0.157677					2.40681
						0.0337554					0.496487
						0.196341					1.66527
						0.242854					1.7377
						0.272858					0.785015
						0.407222					1.89057
						0.0920279					0.65679
						0.447811					2.45748
						0.0796891					0.555089
						0.430625					1.42605
						0.0553201					1.46863
						0.0343247					0.65679
						0.376121					1.24122
						0.343074					1.64666
						0.121941					1.38216
						0.346023					0.496487
						0.439578					1.33683
						0.0916004					0.496487
						0.0682725					0.74473
						0.14578					1.51001
						0.134806					0.82333
						0.187802					0.82333
						0.146043					0.60807
						0.199213					0.555089
						0.0930865					0.85994
						0.336747					1.21614
						0.249123					0.65679
						0.437022					1.4475
						0.371239					1.93884
						0.207205					0.961443
						0.131665					1.38216
						0.133668					1.05321
						0.0768828					0.928842
						0.118099					0.895054
						0.272384					0.65679
						0.438505					1.80724
						0.252893					1.46863
						0.190071					1.19053
						0.26496					1.53028
						0.173585					0.60807
						0.118853					0.60807
						0.333098					1.19053
						0.307225					1.05321
						0.310864					1.98595
						0.345042					1.28991
						0.202177					2.26161
						0.0881354					0.555089
						0.135504					0.496487
						0.312212					1.2658
						0.113047					0.74473
						0.209564					1.46863
						0.0244974					0.85994
						0.030471					0.60807
						0.227808					1.35969
						0.22293					1.35969
						0.553398					1.2658
						0.697476					1.58953
						0.430996					1.90679
						0.177021					1.02353
						0.201268					1.35969
						0.135651					0.702138
						0.0810038					0.895054
						0.103285					1.58953
						0.347263					1.4475
						0.220463					1.38216
						0.254174					1.38216
						0.185184					0.928842
						0.198011					1.57003
						0.185828					1.24122
						0.217817					0.496487
						0.183428					1.2658
						0.13459					1.02353
						0.233788					0.65679
						0.216505					1.16436
						0.212226					0.928842
						0.228553					1.66527
						0.148855					1.28991
						0.234168					0.65679
						0.0998121					1.19053
						0.194764					0.82333
						0.348714					1.38216
						0.147861					0.992974
						0.209554					0.928842
						0.33139					0.74473
						0.257618					0.60807
						0.160711					0.74473
						0.13648					1.19053
						0.185569					1.53028
						0.0473849					0.961443
						0.0411557					0.65679
						0.213781					1.68367
						0.16623					0.65679
						0.177288					1.48946
						0.192917					0.785015
						0.172108					0.74473
						0.29553					2.31546
						0.163949					1.97037
						0.230616					1.40428
						0.222075					0.992974
						0.216822					1.2658
						0.153494					0.496487
						0.217539					0.895054
						0.440185					2.26161
						0.383557					1.75535
						0.28322					2.63886
						0.120029					0.702138
						0.110719					0.928842
						0.332502					0.82333
						0.372549					1.11018
						0.219722					0.60807
						0.310985					0.85994
						0.350483					1.13759
						0.405395					0.65679
						0.202644					0.74473

## Sheet: 4e
		*-1 is taken as the position at the base of the phagocytic cup
Average tooth behavior per target						Individual tooth behavior per target (columns mark individual teeth)
	Time	Great circle distance from equator*				* NaNs indicate that a specific tooth was not detected at the corresponding timepoint
	(s)	(mm)
	-132	-3.89527				NaN	-3.73118	NaN	-4.60382	NaN	NaN	-4.05707	NaN	NaN	NaN	NaN	NaN	NaN	NaN	-5.00872	-3.16827	NaN	-4.28691	NaN	NaN	NaN
	-118.8	-2.70206				-2.1457	NaN	NaN	-1.89881	-4.47903	NaN	-3.94216	NaN	-2.24715	NaN	NaN	NaN	NaN	NaN	-3.22573	NaN	NaN	NaN	NaN	NaN	-2.17712
	-105.6	-1.67408				-0.885213	NaN	NaN	-1.20033	NaN	NaN	-2.56586	NaN	-0.555727	NaN	NaN	NaN	-1.739	NaN	-2.09632	-1.71925	-1.80364	NaN	NaN	-3.45825	NaN
	-92.4	-0.871688				-0.0834937	NaN	-0.395922	-1.67706	-1.34129	NaN	-0.782865	-1.74618	-0.179556	NaN	NaN	-1.59715	-0.47762	NaN	-0.289445	-1.50019	-0.127485	NaN	-0.245094	-2.53533	NaN
	-79.2	0.474576				-0.375273	NaN	0.256765	0.259728	0.822368	NaN	0.630871	NaN	1.58369	NaN	NaN	0.463255	NaN	NaN	1.38977	0.402206	-0.0386046	NaN	0.157112	NaN	NaN
	-66	2.84792				2.52097	NaN	3.10812	NaN	2.97525	4.27972	NaN	NaN	3.42324	2.97615	NaN	2.89894	NaN	NaN	1.89163	2.42401	3.24907	NaN	3.56958	NaN	NaN
	-52.8	4.577				5.04463	NaN	5.15596	NaN	4.70168	5.96576	NaN	NaN	4.55355	NaN	NaN	3.82994	NaN	4.55265	3.44389	NaN	4.70168	NaN	6.72708	NaN	NaN
	-39.6	5.78011				5.67577	NaN	6.62832	NaN	5.41542	6.97127	NaN	NaN	6.70822	NaN	NaN	5.61383	NaN	5.79697	NaN	NaN	6.1929	NaN	6.32218	NaN	NaN
	-26.4	6.74273				5.35706	NaN	6.45595	NaN	NaN	7.97769	NaN	NaN	9.17353	NaN	NaN	8.14198	NaN	NaN	NaN	6.76119	NaN	NaN	6.32936	NaN	NaN
	-13.2	8.30879				8.17699	NaN	6.8384	NaN	NaN	9.37374	NaN	NaN	11.5311	NaN	NaN	10.522	NaN	NaN	NaN	7.83763	NaN	NaN	7.57548	NaN	NaN
	0	10.6049				10.821	NaN	NaN	NaN	NaN	NaN	NaN	NaN	11.6191	NaN	NaN	11.5589	NaN	NaN	NaN	NaN	NaN	NaN	11.1145	NaN	NaN
Target 2	-92.4	-6.72447				-7.12043	-5.93791	-8.68025	NaN	-7.61451	NaN	NaN	NaN	NaN	NaN	NaN	-5.54183	NaN	-6.73007	NaN	NaN	-5.44629	NaN	-6.72447
	-79.2	-5.65592				-7.63738	-4.97344	NaN	NaN	-4.1184	NaN	NaN	-4.4712	NaN	-4.84686	NaN	-5.34665	-5.74763	NaN	-6.17229	-7.88564	NaN	-5.35972	-5.65592
	-66	-4.18373				-4.84604	NaN	-3.96732	-4.0498	NaN	-4.80766	NaN	NaN	-5.32624	NaN	NaN	-4.03265	-4.60186	-2.71212	NaN	-3.07226	NaN	-4.42138	-4.18373
	-52.8	-3.31273				-3.08615	NaN	-2.90322	-2.35769	NaN	-3.15311	NaN	-3.53367	NaN	-3.70599	NaN	-3.07553	NaN	-2.21477	-3.8832	-3.77867	NaN	-4.74804	-3.31273
	-39.6	-2.74188				NaN	NaN	-2.73988	-1.94854	NaN	NaN	-2.56512	NaN	-3.16781	NaN	-1.46672	-2.53327	NaN	-1.7746	NaN	-3.91914	NaN	-4.56185	-2.74188
	-26.4	0.277738				-1.83829	NaN	1.28133	0.449161	NaN	1.0935	0.892606	NaN	0.86974	NaN	0.805224	0.447528	NaN	0.54226	NaN	-0.325029	NaN	-1.16292	0.277738
	-13.2	4.26867				0.83299	NaN	NaN	5.87993	NaN	NaN	6.47119	NaN	NaN	NaN	NaN	6.59124	NaN	0.54716	NaN	NaN	NaN	5.28949	4.26867
	0	9.09723				NaN	NaN	NaN	10.2776	NaN	NaN	NaN	NaN	NaN	NaN	NaN	9.8595	NaN	8.18617	NaN	8.22945	NaN	8.93341	9.09723
Target 3	-132	-5.17137				NaN	NaN	NaN	NaN	NaN	NaN	NaN	NaN	NaN	-6.08696	NaN	NaN	-5.41632	NaN	NaN	NaN	-2.92318	NaN	NaN	-3.54534	NaN	NaN	NaN	NaN	NaN	NaN	NaN	NaN	NaN	NaN	-5.33462	NaN	NaN	-7.72182	NaN
	-118.8	-4.61258				NaN	NaN	NaN	NaN	NaN	NaN	NaN	NaN	NaN	-6.82045	NaN	NaN	-5.75119	NaN	NaN	NaN	-3.65936	NaN	NaN	-2.21662	NaN	NaN	NaN	-2.4671	NaN	NaN	NaN	NaN	NaN	-3.28498	-5.07785	NaN	NaN	-7.62306	NaN
	-105.6	-4.32107				NaN	-2.93485	NaN	-2.76876	NaN	NaN	NaN	NaN	-2.69783	-7.72182	NaN	-1.96704	-5.85443	NaN	NaN	NaN	-3.49057	-6.24407	-2.75439	NaN	-7.41298	NaN	NaN	-2.13223	NaN	-5.67847	NaN	NaN	-2.5102	-3.89727	-5.67039	NaN	NaN	-8.07554	-1.64743
	-92.4	-4.0031				NaN	NaN	-9.39169	-1.08721	NaN	NaN	-1.88714	NaN	-1.69681	-6.70912	NaN	NaN	-5.5043	-1.62768	NaN	NaN	-3.76799	-6.18841	-2.0218	NaN	NaN	NaN	NaN	-1.39964	NaN	-4.79146	NaN	NaN	-2.38181	-3.94036	-5.51866	NaN	NaN	-8.48044	-1.6582
	-79.2	-4.29678				NaN	-4.01308	-9.52097	-0.974991	NaN	NaN	-1.39246	NaN	NaN	-7.46775	NaN	NaN	-4.38566	-1.6178	NaN	NaN	-4.21598	-5.53482	-1.71566	NaN	-2.07208	NaN	NaN	-2.88188	NaN	-5.38848	-5.69104	NaN	NaN	NaN	-5.23317	NaN	NaN	-8.60613	-2.33333
	-66	-4.28639				-8.4167	NaN	NaN	NaN	-4.37399	NaN	NaN	NaN	-1.34039	NaN	NaN	NaN	NaN	NaN	NaN	NaN	-3.85866	-4.42696	NaN	NaN	-1.44273	-6.91471	NaN	-2.59279	NaN	NaN	-6.6382	NaN	-3.25536	-6.00257	NaN	-1.11235	NaN	-7.10863	-2.52546
	-52.8	-3.29187				-7.59164	NaN	NaN	0.274721	-3.54893	NaN	NaN	NaN	NaN	NaN	NaN	NaN	-5.00244	NaN	NaN	NaN	-3.5624	-4.01308	NaN	NaN	NaN	NaN	NaN	-0.665256	NaN	NaN	-6.35091	NaN	-0.140952	NaN	NaN	-0.511735	NaN	-6.86174	-1.52802
	-39.6	-1.41041				-5.68475	NaN	NaN	1.35475	NaN	NaN	NaN	0.000897781	NaN	NaN	-5.75029	0.430037	NaN	NaN	0.998333	NaN	-3.95832	NaN	-0.205592	NaN	0.770296	NaN	-5.66949	NaN	1.2937	NaN	-6.32667	NaN	1.16622	NaN	NaN	1.25151	1.13569	-6.05284	1.26946
	-26.4	2.11742				NaN	NaN	NaN	4.13249	-5.48814	NaN	NaN	NaN	NaN	NaN	-4.67654	2.60267	NaN	NaN	2.11876	4.86957	NaN	NaN	NaN	NaN	NaN	NaN	NaN	NaN	3.94934	NaN	NaN	2.27588	3.90984	NaN	NaN	4.15493	4.02296	NaN	3.53726
	-13.2	6.39613				NaN	NaN	NaN	NaN	NaN	7.42375	NaN	NaN	NaN	NaN	NaN	6.60318	NaN	NaN	2.69783	6.39849	NaN	NaN	NaN	NaN	NaN	NaN	NaN	NaN	6.04027	NaN	NaN	NaN	6.70014	NaN	NaN	NaN	7.74247	NaN	7.56291
	0	8.20406				NaN	NaN	NaN	8.04682	NaN	NaN	NaN	NaN	NaN	NaN	NaN	NaN	NaN	NaN	4.39913	9.43927	NaN	NaN	NaN	NaN	NaN	NaN	NaN	NaN	8.90689	NaN	NaN	NaN	8.98589	NaN	NaN	NaN	9.18969	NaN	8.46069

## Sheet: 4f
	Teeth location
	Fraction engulfed of particle	Tooth position
		normalized by phagocytic axis length L
	0.0812593	0.102494
	0.0812593	0.0121812
	0.0812593	0.0248288
	0.0812593	0.0476992
	0.154162	0.0578867
	0.154162	0.0277216
	0.154162	0.0277787
	0.154162	0.100429
	0.154162	0.0267041
	0.154162	0.0553118
	0.224525	0.0747467
	0.224525	0.0532936
	0.224525	0.174197
	0.224525	0.119125
	0.224525	0.0662648
	0.224525	0.143294
	0.24771	0.0569277
	0.24771	0.0398098
	0.24771	0.154965
	0.24771	0.0859139
	0.24771	0.00949545
	0.24771	0.109828
	0.255111	0.19673
	0.255111	0.255534
	0.255111	0.19497
	0.255111	0.170065
	0.255111	0.186281
	0.255111	0.220178
	0.262581	0.114808
	0.262581	0.0584034
	0.262581	0.164886
	0.262581	0.0394389
	0.262581	0.197093
	0.262581	0.0683424
	0.262581	0.15245
	0.262581	0.0213101
	0.262581	0.093745
	0.262581	0.13431
	0.262581	0.0533207
	0.274266	0.0887284
	0.274266	0.132909
	0.274266	0.0993417
	0.278246	0.177052
	0.278246	0.189353
	0.278246	0.163954
	0.278246	0.278127
	0.278246	0.0254529
	0.278246	0.110386
	0.278246	0.241627
	0.278246	0.129687
	0.278246	0.103766
	0.279805	0.192556
	0.279805	0.0956232
	0.279805	0.0313704
	0.279805	0.00741087
	0.279805	0.0860654
	0.279805	0.262102
	0.279805	0.00403808
	0.279805	0.0514161
	0.279805	0.101921
	0.279805	0.16546
	0.309949	0.199204
	0.309949	0.0810076
	0.309949	0.177654
	0.309949	0.205624
	0.309949	0.0701816
	0.309949	0.0827539
	0.309949	0.19882
	0.309949	0.0774975
	0.309949	0.149936
	0.31493	0.140282
	0.31493	0.189942
	0.31493	0.16307
	0.31493	0.116272
	0.31493	0.0797475
	0.31493	0.179847
	0.31493	0.190296
	0.365773	0.150774
	0.365773	0.145554
	0.365773	0.246211
	0.365773	0.297454
	0.365773	0.0819147
	0.365773	0.294089
	0.365773	0.0924533
	0.365773	0.253326
	0.365773	0.147529
	0.365773	0.124201
	0.385761	0.098481
	0.385761	0.198762
	0.385761	0.191626
	0.385761	0.288476
	0.385761	0.262839
	0.385761	0.0279551
	0.385761	0.140143
	0.385761	0.283972
	0.385761	0.10096
	0.385761	0.270891
	0.441824	0.163551
	0.441824	0.140411
	0.441824	0.223254
	0.441824	0.267894
	0.460113	0.26968
	0.460113	0.132841
	0.460113	0.0605836
	0.460113	0.184102
	0.460113	0.0734332
	0.460113	0.00747382
	0.460113	0.0656433
	0.460113	0.00577833
	0.460113	0.131925
	0.460113	0.024809
	0.460113	0.0462369
	0.460113	0.269136
	0.460113	0.285628
	0.494788	0.286683
	0.494788	0.338491
	0.494788	0.330783
	0.494788	0.165763
	0.494788	0.412895
	0.494788	0.273687
	0.494788	0.160236
	0.494788	0.351969
	0.494788	0.052003
	0.494788	0.214641
	0.494788	0.132415
	0.494788	0.25061
	0.494788	0.348665
	0.504203	0.181186
	0.504203	0.193019
	0.504203	0.324488
	0.504203	0.251986
	0.504203	0.0942853
	0.504203	0.21613
	0.504203	0.271533
	0.504203	0.13511
	0.504203	0.24538
	0.504203	0.261327
	0.509632	0.0941317
	0.509632	0.332502
	0.509632	0.125849
	0.509632	0.162786
	0.509632	0.00399169
	0.509632	0.0698149
	0.509632	0.334349
	0.509632	0.201113
	0.509632	0.102362
	0.509632	0.276031
	0.509632	0.414301
	0.509632	0.167909
	0.509632	0.277226
	0.509632	0.243682
	0.509632	0.152236
	0.509632	0.490898
	0.509632	0.294982
	0.521338	0.380719
	0.521338	0.383341
	0.521338	0.256012
	0.521338	0.351992
	0.521338	0.273794
	0.521338	0.221984
	0.521338	0.172225
	0.521338	0.174855
	0.526883	0.307669
	0.526883	0.0959842
	0.535998	0.215115
	0.535998	0.313785
	0.535998	0.410154
	0.535998	0.364695
	0.535998	0.369345
	0.535998	0.306017
	0.535998	0.220857
	0.535998	0.230542
	0.545015	0.318099
	0.545015	0.305805
	0.545015	0.28686
	0.545015	0.368585
	0.545015	0.365137
	0.545588	0.315094
	0.545588	0.211342
	0.545588	0.313488
	0.545588	0.14802
	0.545588	0.00658876
	0.545588	0.260169
	0.545588	0.278633
	0.545588	0.295006
	0.545588	0.23331
	0.545588	0.215041
	0.545588	0.175205
	0.545961	0.366242
	0.545961	0.5
	0.545961	0.223092
	0.545961	0.111488
	0.545961	0.353757
	0.545961	0.398155
	0.545961	0.203435
	0.545961	0.444566
	0.545961	0.209787
	0.545961	0.20171
	0.551206	0.0976097
	0.551206	0.203775
	0.551206	0.130424
	0.551206	0.333718
	0.551206	0.1492
	0.551206	0.144438
	0.551206	0.0536047
	0.551206	0.396883
	0.551206	0.319586
	0.551206	0.235919
	0.551206	0.0714189
	0.552023	0.322826
	0.552023	0.439793
	0.552023	0.255493
	0.552023	0.41704
	0.552023	0.125615
	0.552023	0.383344
	0.552023	0.165045
	0.552023	0.333296
	0.552023	0.393791
	0.552023	0.322123
	0.552023	0.171124
	0.552023	0.429589
	0.558392	0.375974
	0.558392	0.379843
	0.558392	0.139042
	0.558392	0.0159943
	0.558392	0.157386
	0.558392	0.218828
	0.558392	0.271517
	0.558392	0.0765505
	0.558392	0.397901
	0.558392	0.391134
	0.566571	0.390527
	0.566571	0.308364
	0.566571	0.318117
	0.566571	0.391308
	0.566571	0.340885
	0.566571	0.383457
	0.566571	0.38963
	0.566571	0.387115
	0.566571	0.488575
	0.566571	0.361091
	0.578668	0.40915
	0.585354	0.307894
	0.585354	0.322816
	0.585354	0.369698
	0.585354	0.166998
	0.585354	0.159346
	0.585354	0.249153
	0.585354	0.484382
	0.585354	0.47397
	0.585354	0.466191
	0.585354	0.27337
	0.585354	0.309127
	0.585389	0.332204
	0.585389	0.283127
	0.585389	0.5
	0.585389	0.346203
	0.585389	0.38492
	0.585389	0.497382
	0.585389	0.457959
	0.585389	0.444583
	0.588778	0.304021
	0.588778	0.401569
	0.588778	0.141708
	0.588778	0.255597
	0.588778	0.287856
	0.588778	0.13376
	0.588778	0.117553
	0.588778	0.407027
	0.588778	0.495061
	0.588778	0.315306
	0.588778	0.0634482
	0.588778	0.159372
	0.588778	0.470468
	0.588778	0.048583
	0.588778	0.431505
	0.588778	0.22212
	0.588778	0.375991
	0.650554	0.427911
	0.650554	0.606757
	0.650554	0.326099
	0.650554	0.364103
	0.650554	0.28425
	0.650554	0.341765
	0.652246	0.385541
	0.652246	0.116543
	0.652246	0.0711587
	0.652246	0.151505
	0.652246	0.019225
	0.652246	0.199251
	0.652246	0.076558
	0.652246	0.303738
	0.652246	0.374041
	0.652246	0.0073988
	0.652246	0.392947
	0.652246	0.141846
	0.652246	0.0512648
	0.652246	0.492068
	0.652246	0.301026
	0.652246	0.0446019
	0.652246	0.215502
	0.652246	0.521774
	0.652246	0.471875
	0.652246	0.123557
	0.652246	0.261293
	0.652348	0.573941
	0.652348	0.352764
	0.652348	0.582135
	0.652348	0.382567
	0.652348	0.443315
	0.652348	0.449201
	0.652348	0.383061
	0.652348	0.557487
	0.652348	0.370163
	0.652348	0.465677
	0.652348	0.321869
	0.652348	0.370684
	0.652348	0.593732
	0.666894	0.279643
	0.666894	0.187455
	0.666894	0.163248
	0.666894	0.255332
	0.666894	0.329913
	0.666894	0.147353
	0.666894	0.39909
	0.666894	0.163615
	0.666894	0.438627
	0.666894	0.0670982
	0.666894	0.457486
	0.666894	0.45582
	0.666894	0.376838
	0.678297	0.0820777
	0.678297	0.0112901
	0.678297	0.406638
	0.678297	0.027496
	0.678297	0.363263
	0.678297	0.134282
	0.685069	0.55894
	0.685069	0.217768
	0.685069	0.606273
	0.685069	0.616011
	0.685069	0.344417
	0.685069	0.481613
	0.685069	0.279549
	0.685069	0.44483
	0.685069	0.160691
	0.685069	0.309128
	0.685069	0.512248
	0.685069	0.286981
	0.685069	0.525276
	0.686751	0.453893
	0.686751	0.443582
	0.686751	0.425983
	0.686751	0.446102
	0.686751	0.489965
	0.686751	0.572645
	0.686751	0.382243
	0.686751	0.534351
	0.686751	0.451411
	0.686751	0.521552
	0.686751	0.229926
	0.686751	0.350031
	0.686751	0.536018
	0.705855	0.42367
	0.705855	0.398018
	0.705855	0.279991
	0.705855	0.306365
	0.705855	0.00995018
	0.705855	0.260298
	0.705855	0.366183
	0.705855	0.13185
	0.705855	0.400725
	0.708096	0.473606
	0.708096	0.299976
	0.708096	0.373955
	0.708096	0.0738038
	0.708096	0.131764
	0.708096	0.362756
	0.708096	0.137508
	0.708096	0.32663
	0.708096	0.277952
	0.708096	0.554543
	0.708096	0.240092
	0.709552	0.578112
	0.709552	0.184674
	0.709552	0.605789
	0.709552	0.573372
	0.709552	0.104215
	0.709552	0.477606
	0.709552	0.0687708
	0.709552	0.379244
	0.709552	0.369679
	0.709552	0.14216
	0.709552	0.0909556
	0.709552	0.380906
	0.709552	0.339327
	0.709552	0.112065
	0.709552	0.477484
	0.717211	0.497762
	0.717211	0.346696
	0.717211	0.42744
	0.717211	0.203703
	0.717211	0.379043
	0.717211	0.507767
	0.717211	0.145468
	0.717211	0.461387
	0.717211	0.0766257
	0.717211	0.471193
	0.717211	0.237145
	0.717211	0.100836
	0.717211	0.56325
	0.717211	0.633351
	0.717211	0.637116
	0.717211	0.602278
	0.717211	0.488808
	0.725278	0.37787
	0.725278	0.568113
	0.725278	0.450982
	0.725278	0.468518
	0.725278	0.483414
	0.725278	0.534569
	0.725278	0.526077
	0.725278	0.48909
	0.725278	0.461411
	0.725278	0.385617
	0.735907	0.39323
	0.735907	0.0265952
	0.735907	0.272043
	0.735907	0.0720738
	0.735907	0.255148
	0.735907	0.5
	0.735907	0.134163
	0.743092	0.492593
	0.743092	0.596515
	0.743092	0.573526
	0.743092	0.226524
	0.743092	0.53702
	0.743092	0.207029
	0.743092	0.466607
	0.743092	0.0454687
	0.743092	0.351434
	0.743092	0.657121
	0.743092	0.454274
	0.743092	0.469169
	0.743092	0.489548
	0.747931	0.351182
	0.747931	0.32167
	0.747931	0.36767
	0.747931	0.361244
	0.747931	0.176656
	0.747931	0.490598
	0.77146	0.395763
	0.77146	0.667376
	0.77146	0.178249
	0.77146	0.55516
	0.77146	0.415575
	0.78125	0.328957
	0.78125	0.482648
	0.78125	0.36123
	0.78125	0.496804
	0.784089	0.556341
	0.784089	0.0841997
	0.784089	0.0556472
	0.784089	0.597044
	0.784089	0.146538
	0.784089	0.165855
	0.784089	0.410455
	0.784089	0.315477
	0.784089	0.583394
	0.784089	0.46866
	0.784232	0.491916
	0.784232	0.24606
	0.784232	0.627783
	0.784232	0.576104
	0.784232	0.639827
	0.784232	0.313791
	0.784232	0.178226
	0.784232	0.245219
	0.784232	0.082607
	0.784232	0.385598
	0.784232	0.0944656
	0.784232	0.298139
	0.784232	0.202115
	0.784232	0.320936
	0.784232	0.238271
	0.784232	0.524845
	0.803538	0.556594
	0.803538	0.682299
	0.803538	0.285149
	0.803538	0.704136
	0.803538	0.496456
	0.803538	0.182619
	0.803538	0.510443
	0.803538	0.584186
	0.803538	0.346552
	0.803538	0.498421
	0.803538	0.0551452
	0.803538	0.719236
	0.803538	0.466902
	0.803538	0.649537
	0.803538	0.318143
	0.803538	0.640876
	0.803538	0.518474
	0.809404	0.764545
	0.809404	0.545522
	0.809404	0.711194
	0.809404	0.609247
	0.809404	0.595393
	0.809404	0.613382
	0.809404	0.286829
	0.809404	0.343332
	0.809404	0.443774
	0.809404	0.511906
	0.809404	0.622391
	0.809404	0.718552
	0.815279	0.700409
	0.815279	0.336163
	0.815279	0.549937
	0.815279	0.112931
	0.815279	0.653401
	0.815279	0.727275
	0.815279	0.487496
	0.815279	0.574498
	0.815279	0.480888
	0.815279	0.575745
	0.815279	0.63154
	0.815279	0.211331
	0.815279	0.680091
	0.815279	0.660921
	0.815279	0.438533
	0.816401	0.658007
	0.816401	0.635756
	0.816401	0.611407
	0.816401	0.235395
	0.816401	0.656372
	0.816401	0.644971
	0.816401	0.534928
	0.816401	0.5
	0.816401	0.243313
	0.816401	0.585148
	0.816401	0.336778
	0.816401	0.701937
	0.816401	0.472672
	0.816401	0.715314
	0.816401	0.454518
	0.820306	0.549213
	0.820306	0.551759
	0.820306	0.683378
	0.820306	0.333375
	0.820306	0.674541
	0.820306	0.590904
	0.820306	0.5
	0.820306	0.529432
	0.820306	0.634228
	0.820306	0.583161
	0.821605	0.660666
	0.821605	0.702433
	0.821605	0.723487
	0.821605	0.696241
	0.821605	0.536689
	0.821605	0.532339
	0.821605	0.548203
	0.821605	0.589342
	0.821605	0.599128
	0.821605	0.621443
	0.822106	0.693666
	0.822106	0.470288
	0.822106	0.24691
	0.822106	0.476428
	0.822106	0.547204
	0.822106	0.266616
	0.822106	0.592842
	0.822106	0.620909
	0.822106	0.0314787
	0.832658	0.390879
	0.832658	0.726127
	0.832658	0.326642
	0.832658	0.688064
	0.832658	0.429831
	0.832658	0.549894
	0.832658	0.762605
	0.832658	0.515429
	0.832658	0.552622
	0.832658	0.765318
	0.832658	0.688752
	0.832658	0.720349
	0.832658	0.483488
	0.832658	0.646873
	0.845299	0.543172
	0.845299	0.700195
	0.845299	0.543171
	0.845299	0.479588
	0.845299	0.737268
	0.845299	0.538329
	0.845299	0.709239
	0.845299	0.136735
	0.845299	0.656077
	0.845299	0.218533
	0.845299	0.560348
	0.845299	0.666295
	0.845299	0.420503
	0.845299	0.618503
	0.845299	0.684068
	0.845299	0.76963
	0.845299	0.569587
	0.845299	0.436741
	0.845299	0.532436
	0.845299	0.403132
	0.845299	0.623205
	0.863936	0.780653
	0.863936	0.678959
	0.863936	0.642978
	0.863936	0.838838
	0.863936	0.708515
	0.863936	0.300631
	0.863936	0.65235
	0.863936	0.573217
	0.863936	0.323501
	0.863936	0.699839
	0.863936	0.531863
	0.863936	0.720952
	0.863936	0.809549
	0.863936	0.50886
	0.872479	0.37182
	0.872479	0.67338
	0.872479	0.741452
	0.872479	0.481287
	0.872479	0.680739
	0.872479	0.512654
	0.872479	0.81151
	0.872479	0.48541
	0.872479	0.240665
	0.872479	0.0743758
	0.872479	0.777276
	0.872479	0.519337
	0.872479	0.747027
	0.872479	0.656741
	0.892995	0.633144
	0.892995	0.720912
	0.892995	0.0510538
	0.892995	0.237999
	0.892995	0.502733
	0.892995	0.706014
	0.892995	0.00732257
	0.892995	0.661914
	0.892995	0.0153225
	0.892995	0.74583
	0.892995	0.00721979
	0.892995	0.768495
	0.892995	0.282726
	0.892995	0.0177754
	0.892995	0.148322
	0.892995	0.322264
	0.892995	0.32702
	0.892995	0.340933
	0.900074	0.442683
	0.900074	0.752841
	0.900074	0.744127
	0.900074	0.676314
	0.900074	0.83414
	0.900074	0.395388
	0.900074	0.780034
	0.900074	0.536782
	0.900074	0.635241
	0.900074	0.627229
	0.900074	0.674815
	0.900074	0.767424
	0.900074	0.76326
	0.980937	0.967315
	0.980937	0.972904
	0.980937	0.929564
	0.980937	0.721217
	0.980937	0.5
	0.980937	0.917648
	0.980937	0.640829
	0.993559	0.311313
	0.993559	0.945171
	0.993559	0.967745
	0.993559	0.651515
	0.993559	0.961424
	0.993559	0.93756
	0.993559	0.594386
	0.993559	0.970935

## Sheet: 4g
	DMSO		CK666		Blebbistatin		SMIFH2
	Number of rim teeth	Constriction magnitude (mm)	Number of rim teeth	Constriction magnitude (mm)	Number of rim teeth	Constriction magnitude (mm)	Number of rim teeth	Constriction magnitude (mm)
	4	NaN	0	NaN	0	0.0139449	3	NaN
	7	0.119223	1	NaN	6	NaN	2	0.0319952
	6	0.074827	2	NaN	5	NaN	4	0.0407856
	5	0.0367408	0	NaN	8	0.148592	5	NaN
	6	0.12958	1	0.0214871	3	0.0311195	7	0.0789385
	10	0.123597	5	0.0341216	0	0.0425918	3	0.0442148
	0	0.0288271	0	0.0187328	1	0.0201592	3	0.0741218
	3	0.108486	2	NaN	7	0.0328235	0	0.0336305
	9	0.0427487	0	0.0364081	7	0.0622387	9	0.0542568
	10	0.00982458	1	0.0206971	4	0.048165	2	0.0133908
	11	0.102596	1	NaN	2	0.0352801	1	NaN
	7	0.0577686	0	0.0245505	3	0.0581462	3	NaN
	9	0.041011	0	0.00709893	2	NaN	0	0.0135536
	9	0.0771697	0	0.00845191	0	NaN	13	NaN
	4	0.0577764	5	0.057419	0	0.0391319	3	0.0757568
	5	0.0581765	5	0.0447274	4	0.0539413	6	0.0297484
	12	0.205475	0	0.052642	10	0.0831094	11	NaN
	9	0.127942	4	0.02993	3	0.0294058	2	0.136848
	8	0.0794006	0	NaN	1	0.0433651	0	0.0323536
	9	0.223096	1	NaN	0	0.0501641	2	0.0265432
	1	0.198624	0	0.00906474	1	0.0169423	5	0.0513243
	8	0.324625	0	0.012639	3	0.0644425	11	0.0735521
	5	0.201669	0	0.0107854	1	NaN	5	0.0262638
	8	0.145573	2	0.0281185	3	0.0717107	10	0.142767
	7	0.072398	1	0.0299622	4	0.0438202	0	0.0138499
	5	0.0796207	1	0.0385852	0	0.0550044	2	0.0677036
	9	0.126623	1	0.0318624	1	0.0620266	11	0.335696
	6	NaN	1	0.022408	3	0.035288	3	0.0629897
	11	0.256822	4	0.0761369	2	0.0798138	10	0.81328
	1	NaN	4	0.0299065	10	0.0480846	3	0.030051
	11	0.185322	0	0.0283831	1	0.0326981	1	0.0568992
	8	0.326367	1	NaN	9	0.357697	11	0.238573
	12	0.0965669	0	0.0512852	0	0.018375	1	0.0110347
	5	0.128212	0	NaN	10	0.368892	7	0.117323
	8	0.106826	0	NaN	0	0.0373483	0	0.0285991
	13	0.397712	1	0.0324711	8	0.288054	2	NaN
	8	0.121304	1	0.037421	2	0.124504	8	0.188715
	2	0.126049	0	NaN	7	0.089463	3	0.332608
	11	0.204763	0	0.020927	5	0.0966025	1	0.0370366
	11	0.12147	3	0.0382141	5	0.0916476	2	0.0608276
	6	0.0860742	0	0.0162028	0	0.0954489	8	0.363718
	5	0.244645	2	0.0568758	0	0.11658	3	0.129527
	9	0.141289	0	NaN	5	0.042174	13	0.504623
	12	0.223515	10	0.130149	2	0.0725812	10	0.17539
	10	0.227121	9	0.0938538	2	0.0341111	3	0.150131
	1	0.0268679	2	0.0546294	2	0.0841426	2	0.202409
	10	0.281079	1	0.0322441	9	0.068407	1	NaN
	4	0.108939	0	0.0218769	6	0.0536383	7	0.346464
	4	0.142195	3	0.0272074	10	0.279265	7	0.274121
	3	0.190291	0	0.0567746	4	0.131277	12	0.420927
	3	0.107983	2	0.0522747	1	0.0719883	8	0.414408
	5	0.236802	1	0.106296	7	0.0909377	0	0.0894748
	0	0.177335	1	0.0544205	2	0.119726	9	0.290099
	12	0.316418	3	NaN	0	0.102587	7	0.120102
	10	0.329117	8	0.194082	3	0.153372	5	0.196931
	12	0.26295	7	NaN	0	0.0709974
	10	0.138791	0	0.115377	0	0.104368
	9	0.284321	2	0.0478147	1	0.0736322
	11	0.228088	6	0.163915	2	0.0271121
	8	0.209213	3	0.0884392	4	0.152654
	14	0.553442	1	NaN	0	0.0741732
	14	0.293542	2	0.0424345	0	0.0172469
	12	0.204129	3	NaN	8	0.0211026
	7	0.189437			1	0.0799772
	7	0.125829			1	0.0696524
	11	0.239219			0	0.105395
	6	0.0911244			4	0.0746243
	5	0.308106			7	0.049217
					0	0.0084786
					2	0.192753
					1	0.0703986
					4	0.0925763
					0	0.175303

## Sheet: 4h
	Fraction engulfed of particle	Number of rim teeth		Fraction engulfed (per tooth)	Rim tooth depth	Rim tooth diameter
					(mm)	(mm)
	0.0812593	4		0.0812593	0.0488197	0.496487
	0.154162	7		0.0812593	0.153937	1.42605
	0.224525	6		0.0812593	0.075105	0.85994
	0.24771	5		0.0812593	0.0848025	0.555089
	0.255111	6		0.154162	0.291816	1.90679
	0.262581	10		0.154162	0.342136	1.21614
	0.268763	0		0.154162	0.280278	1.08207
	0.274266	3		0.154162	0.19885	0.85994
	0.278246	9		0.154162	0.0845767	0.785015
	0.279805	10		0.154162	0.134686	0.82333
	0.309949	11		0.154162	0.167928	0.74473
	0.31493	7		0.224525	0.224196	1.05321
	0.365773	9		0.224525	0.314679	1.21614
	0.385761	9		0.224525	0.203839	0.895054
	0.441824	4		0.224525	0.354416	1.31358
	0.460113	5		0.224525	0.205866	0.961443
	0.494788	12		0.224525	0.174312	0.82333
	0.504203	9		0.24771	0.184197	0.85994
	0.509632	8		0.24771	0.164612	0.82333
	0.521338	9		0.24771	0.107534	0.60807
	0.526883	1		0.24771	0.160853	0.74473
	0.535998	8		0.24771	0.148639	0.74473
	0.545015	5		0.255111	0.198175	0.702138
	0.545588	8		0.255111	0.0763252	0.60807
	0.545961	7		0.255111	0.0928465	0.60807
	0.551206	5		0.255111	0.247102	1.24122
	0.552023	9		0.255111	0.181439	0.74473
	0.558392	6		0.255111	0.142347	1.40428
	0.566571	11		0.262581	0.101509	0.60807
	0.578668	1		0.262581	0.101362	0.74473
	0.585354	11		0.262581	0.210184	1.24122
	0.585389	8		0.262581	0.112767	0.496487
	0.588778	12		0.262581	0.276574	1.13759
	0.650554	5		0.262581	0.184996	0.928842
	0.652246	8		0.262581	0.210016	1.11018
	0.652348	13		0.262581	0.133773	1.19053
	0.666894	8		0.262581	0.159482	1.24122
	0.678297	2		0.262581	0.0985633	0.82333
	0.685069	11		0.274266	0.215526	0.702138
	0.686751	11		0.274266	0.114588	0.85994
	0.705855	6		0.274266	0.186618	1.08207
	0.708096	5		0.278246	0.0930112	1.16436
	0.709552	9		0.278246	0.0671673	0.65679
	0.717211	12		0.278246	0.235132	1.21614
	0.725278	10		0.278246	0.265585	1.19053
	0.735907	1		0.278246	0.140696	0.555089
	0.743092	10		0.278246	0.308568	1.62784
	0.747931	4		0.278246	0.272227	1.02353
	0.77146	4		0.278246	0.306281	1.16436
	0.78125	3		0.278246	0.17412	0.895054
	0.784089	3		0.279805	0.150137	0.928842
	0.784232	5		0.279805	0.138869	0.785015
	0.792615	0		0.279805	0.166438	0.555089
	0.803538	12		0.279805	0.145123	1.6088
	0.809404	10		0.279805	0.0399549	0.496487
	0.815279	12		0.279805	0.0973019	0.992974
	0.816401	10		0.279805	0.0958883	0.992974
	0.820306	9		0.279805	0.0952305	0.74473
	0.821605	11		0.279805	0.103311	0.65679
	0.822106	8		0.279805	0.13893	0.82333
	0.832658	14		0.309949	0.223488	1.08207
	0.845299	14		0.309949	0.174527	0.785015
	0.863936	12		0.309949	0.258613	1.55028
	0.872479	7		0.309949	0.0927181	0.928842
	0.892995	7		0.309949	0.182699	1.4475
	0.900074	11		0.309949	0.0863135	1.31358
	0.980937	6		0.309949	0.131392	0.74473
	0.993559	5		0.309949	0.10276	0.74473
				0.309949	0.060782	0.65679
				0.309949	0.159472	0.928842
				0.309949	0.205913	0.928842
				0.31493	0.0807742	0.65679
				0.31493	0.0716789	0.785015
				0.31493	0.0730338	0.85994
				0.31493	0.180022	1.19053
				0.31493	0.166071	1.16436
				0.31493	0.105762	1.02353
				0.31493	0.0806127	0.496487
				0.365773	0.214042	1.51001
				0.365773	0.106474	1.08207
				0.365773	0.174569	0.74473
				0.365773	0.209316	1.08207
				0.365773	0.140302	0.702138
				0.365773	0.112027	1.21614
				0.365773	0.146155	0.82333
				0.365773	0.101319	1.11018
				0.365773	0.215824	1.42605
				0.385761	0.0944915	0.65679
				0.385761	0.094551	1.7377
				0.385761	0.129852	1.2658
				0.385761	0.169671	0.65679
				0.385761	0.248644	1.19053
				0.385761	0.233706	1.11018
				0.385761	0.293143	2.0014
				0.385761	0.298445	1.66527
				0.385761	0.25565	1.48946
				0.441824	0.115106	1.57003
				0.441824	0.187096	1.21614
				0.441824	0.137112	0.85994
				0.441824	0.188445	1.53028
				0.460113	0.260882	0.895054
				0.460113	0.112577	0.496487
				0.460113	0.157298	0.496487
				0.460113	0.346608	1.38216
				0.460113	0.209879	0.65679
				0.494788	0.117283	1.24122
				0.494788	0.086964	0.992974
				0.494788	0.144621	1.31358
				0.494788	0.121268	0.702138
				0.494788	0.173122	1.28991
				0.494788	0.220452	1.71988
				0.494788	0.284498	0.961443
				0.494788	0.13728	0.82333
				0.494788	0.193966	0.961443
				0.494788	0.0939233	1.05321
				0.494788	0.162255	1.31358
				0.494788	0.157805	1.33683
				0.504203	0.082514	0.82333
				0.504203	0.124641	0.702138
				0.504203	0.0982867	0.65679
				0.504203	0.179949	1.02353
				0.504203	0.238597	0.785015
				0.504203	0.2243	0.702138
				0.504203	0.161726	0.82333
				0.504203	0.129442	0.992974
				0.504203	0.0669355	0.895054
				0.509632	0.167994	0.785015
				0.509632	0.24443	0.555089
				0.509632	0.219306	1.28991
				0.509632	0.175687	1.2658
				0.509632	0.123421	0.928842
				0.509632	0.0517895	0.85994
				0.509632	0.102081	0.496487
				0.509632	0.195579	0.895054
				0.521338	0.194903	0.85994
				0.521338	0.241829	0.992974
				0.521338	0.0840281	0.928842
				0.521338	0.16521	0.74473
				0.521338	0.126537	1.05321
				0.521338	0.230082	1.02353
				0.521338	0.206028	1.08207
				0.521338	0.201362	0.961443
				0.521338	0.197539	0.895054
				0.526883	0.196006	0.496487
				0.535998	0.228262	1.19053
				0.535998	0.105567	1.48946
				0.535998	0.237263	0.82333
				0.535998	0.248776	1.19053
				0.535998	0.302925	1.42605
				0.535998	0.0306454	0.60807
				0.535998	0.166706	0.65679
				0.535998	0.205248	0.785015
				0.545015	0.276343	1.24122
				0.545015	0.17134	0.60807
				0.545015	0.293547	1.11018
				0.545015	0.132759	0.928842
				0.545015	0.0927569	0.785015
				0.545588	0.112437	0.82333
				0.545588	0.138048	0.702138
				0.545588	0.0740524	1.02353
				0.545588	0.0436701	0.85994
				0.545588	0.138258	1.19053
				0.545588	0.128857	1.11018
				0.545588	0.239122	1.19053
				0.545588	0.221558	0.992974
				0.545961	0.215307	0.961443
				0.545961	0.196329	0.65679
				0.545961	0.186601	0.85994
				0.545961	0.208148	0.992974
				0.545961	0.223045	1.24122
				0.545961	0.088464	1.05321
				0.545961	0.110681	0.65679
				0.551206	0.327601	1.08207
				0.551206	0.149318	1.16436
				0.551206	0.155904	0.82333
				0.551206	0.13706	1.08207
				0.551206	0.200233	1.16436
				0.552023	0.235153	1.13759
				0.552023	0.221712	1.21614
				0.552023	0.136989	0.82333
				0.552023	0.11737	0.961443
				0.552023	0.248496	1.08207
				0.552023	0.13049	0.785015
				0.552023	0.213957	1.48946
				0.552023	0.173187	1.53028
				0.552023	0.0897664	1.02353
				0.558392	0.130673	1.08207
				0.558392	0.128039	1.08207
				0.558392	0.125429	0.60807
				0.558392	0.126944	0.74473
				0.558392	0.124747	0.74473
				0.558392	0.0899921	0.702138
				0.566571	0.0887329	1.02353
				0.566571	0.134252	0.82333
				0.566571	0.212161	1.46863
				0.566571	0.331713	1.75535
				0.566571	0.278844	1.35969
				0.566571	0.20468	1.19053
				0.566571	0.181055	1.13759
				0.566571	0.195666	0.928842
				0.566571	0.18393	0.895054
				0.566571	0.107156	0.928842
				0.566571	0.178977	1.40428
				0.578668	0.113669	0.702138
				0.585354	0.13067	0.555089
				0.585354	0.0589032	0.555089
				0.585354	0.0894345	1.31358
				0.585354	0.129681	0.895054
				0.585354	0.239289	1.70187
				0.585354	0.173007	1.21614
				0.585354	0.207358	1.38216
				0.585354	0.111383	0.60807
				0.585354	0.0835501	0.555089
				0.585354	0.127714	1.05321
				0.585354	0.140985	0.928842
				0.585389	0.236495	1.64666
				0.585389	0.300336	1.85768
				0.585389	0.266036	1.51001
				0.585389	0.339143	1.62784
				0.585389	0.451852	1.42605
				0.585389	0.340131	1.57003
				0.585389	0.218426	1.02353
				0.585389	0.301498	1.77281
				0.588778	0.166307	1.42605
				0.588778	0.13695	1.02353
				0.588778	0.135278	1.85768
				0.588778	0.351891	1.38216
				0.588778	0.163781	0.895054
				0.588778	0.324334	1.05321
				0.588778	0.238562	1.21614
				0.588778	0.264143	1.19053
				0.588778	0.118549	0.702138
				0.588778	0.162705	1.13759
				0.588778	0.228682	1.7377
				0.588778	0.153512	0.65679
				0.650554	0.301827	1.19053
				0.650554	0.186026	0.702138
				0.650554	0.40341	1.2658
				0.650554	0.311872	0.961443
				0.650554	0.252566	0.555089
				0.652246	0.308175	1.80724
				0.652246	0.196067	1.48946
				0.652246	0.266042	1.13759
				0.652246	0.451769	1.79011
				0.652246	0.268675	1.38216
				0.652246	0.164856	1.19053
				0.652246	0.0941749	0.961443
				0.652246	0.288234	1.53028
				0.652348	0.289559	1.24122
				0.652348	0.3997	1.46863
				0.652348	0.271777	0.60807
				0.652348	0.20463	1.28991
				0.652348	0.131534	1.57003
				0.652348	0.20558	1.2658
				0.652348	0.170698	0.496487
				0.652348	0.230814	0.74473
				0.652348	0.228331	0.74473
				0.652348	0.284249	1.79011
				0.652348	0.23028	0.85994
				0.652348	0.173542	1.28991
				0.652348	0.316671	0.496487
				0.666894	0.121073	1.31358
				0.666894	0.271954	1.53028
				0.666894	0.229223	1.21614
				0.666894	0.186451	1.11018
				0.666894	0.24151	1.19053
				0.666894	0.222006	0.961443
				0.666894	0.229645	0.555089
				0.666894	0.15995	1.08207
				0.678297	0.153024	0.74473
				0.678297	0.129508	0.785015
				0.685069	0.217642	1.13759
				0.685069	0.157389	1.02353
				0.685069	0.0856528	0.555089
				0.685069	0.121286	1.05321
				0.685069	0.0479464	1.02353
				0.685069	0.206662	1.16436
				0.685069	0.249117	1.42605
				0.685069	0.106571	0.82333
				0.685069	0.211302	1.11018
				0.685069	0.0981607	0.785015
				0.685069	0.122193	0.928842
				0.686751	0.0711016	0.65679
				0.686751	0.0443921	0.961443
				0.686751	0.0883465	1.28991
				0.686751	0.19379	1.62784
				0.686751	0.325148	1.8742
				0.686751	0.281256	0.961443
				0.686751	0.223367	1.68367
				0.686751	0.0255371	0.65679
				0.686751	0.0997778	0.961443
				0.686751	0.127435	1.05321
				0.686751	0.130531	0.992974
				0.705855	0.157611	0.555089
				0.705855	0.110452	0.992974
				0.705855	0.0713997	0.65679
				0.705855	0.13785	0.65679
				0.705855	0.260584	1.21614
				0.705855	0.247051	1.21614
				0.708096	0.220894	1.02353
				0.708096	0.201586	1.68367
				0.708096	0.158798	1.19053
				0.708096	0.228453	1.38216
				0.708096	0.250896	1.2658
				0.709552	0.157334	1.28991
				0.709552	0.189773	1.31358
				0.709552	0.21653	1.80724
				0.709552	0.155766	1.46863
				0.709552	0.245732	1.68367
				0.709552	0.238794	1.55028
				0.709552	0.16874	1.05321
				0.709552	0.205228	0.895054
				0.709552	0.203537	1.85768
				0.717211	0.220014	1.46863
				0.717211	0.0973101	0.85994
				0.717211	0.0911522	0.702138
				0.717211	0.170173	0.895054
				0.717211	0.226464	1.42605
				0.717211	0.237259	1.64666
				0.717211	0.162546	1.53028
				0.717211	0.150235	1.24122
				0.717211	0.145173	0.961443
				0.717211	0.162077	0.895054
				0.717211	0.150044	0.85994
				0.717211	0.219879	0.65679
				0.725278	0.195389	1.13759
				0.725278	0.157793	0.74473
				0.725278	0.0964355	1.33683
				0.725278	0.0508791	0.74473
				0.725278	0.195249	1.35969
				0.725278	0.25594	1.46863
				0.725278	0.207461	1.35969
				0.725278	0.113036	0.895054
				0.725278	0.176416	1.08207
				0.725278	0.254725	1.89057
				0.735907	0.175308	0.895054
				0.743092	0.138331	0.961443
				0.743092	0.19289	1.24122
				0.743092	0.135777	2.12099
				0.743092	0.225245	1.8742
				0.743092	0.0809621	1.08207
				0.743092	0.162158	1.2658
				0.743092	0.0883447	0.928842
				0.743092	0.137074	1.02353
				0.743092	0.118383	1.31358
				0.743092	0.125381	0.992974
				0.747931	0.171625	0.555089
				0.747931	0.152343	0.65679
				0.747931	0.219109	0.82333
				0.747931	0.19434	0.82333
				0.77146	0.155871	0.961443
				0.77146	0.0632793	0.496487
				0.77146	0.1998	1.11018
				0.77146	0.0758603	1.02353
				0.78125	0.0954414	0.74473
				0.78125	0.10957	0.65679
				0.78125	0.259183	1.58953
				0.784089	0.214296	0.555089
				0.784089	0.131884	1.35969
				0.784089	0.124253	0.785015
				0.784232	0.240827	1.13759
				0.784232	0.274833	0.928842
				0.784232	0.259011	1.28991
				0.784232	0.2728	0.82333
				0.784232	0.266156	1.11018
				0.803538	0.168231	0.496487
				0.803538	0.24169	1.16436
				0.803538	0.117168	0.60807
				0.803538	0.0486242	0.702138
				0.803538	0.113801	1.35969
				0.803538	0.140783	1.38216
				0.803538	0.100095	0.74473
				0.803538	0.0716603	0.555089
				0.803538	0.0813668	0.74473
				0.803538	0.107043	0.82333
				0.803538	0.200472	1.05321
				0.803538	0.286367	1.11018
				0.809404	0.436437	0.60807
				0.809404	0.412653	0.785015
				0.809404	0.226008	0.82333
				0.809404	0.429997	0.961443
				0.809404	0.263073	0.82333
				0.809404	0.3111	1.66527
				0.809404	0.292595	0.992974
				0.809404	0.348513	2.04707
				0.809404	0.390802	1.68367
				0.809404	0.519043	1.48946
				0.815279	0.323151	0.928842
				0.815279	0.089512	0.496487
				0.815279	0.283585	1.02353
				0.815279	0.236275	1.77281
				0.815279	0.159476	1.2658
				0.815279	0.267393	0.60807
				0.815279	0.30271	1.19053
				0.815279	0.322691	1.08207
				0.815279	0.157064	1.24122
				0.815279	0.0758333	0.555089
				0.815279	0.228824	1.62784
				0.815279	0.260141	0.928842
				0.816401	0.332999	0.992974
				0.816401	0.202521	0.992974
				0.816401	0.194546	1.42605
				0.816401	0.337084	1.62784
				0.816401	0.284408	1.46863
				0.816401	0.220385	1.51001
				0.816401	0.247012	1.77281
				0.816401	0.227744	0.702138
				0.816401	0.450653	1.40428
				0.816401	0.460159	1.13759
				0.820306	0.169542	0.961443
				0.820306	0.166788	1.08207
				0.820306	0.15086	1.05321
				0.820306	0.115401	0.785015
				0.820306	0.112528	1.02353
				0.820306	0.34465	1.7377
				0.820306	0.132313	0.785015
				0.820306	0.204556	1.31358
				0.820306	0.119219	0.555089
				0.821605	0.121233	1.35969
				0.821605	0.226837	1.24122
				0.821605	0.219419	1.28991
				0.821605	0.144586	1.13759
				0.821605	0.151015	0.992974
				0.821605	0.21763	1.66527
				0.821605	0.18249	1.31358
				0.821605	0.0850498	0.60807
				0.821605	0.0738351	1.58953
				0.821605	0.111383	0.928842
				0.821605	0.0829979	0.65679
				0.822106	0.113945	1.02353
				0.822106	0.0879573	0.992974
				0.822106	0.211069	1.53028
				0.822106	0.162247	1.19053
				0.822106	0.114334	1.08207
				0.822106	0.105493	0.555089
				0.822106	0.140996	0.928842
				0.822106	0.176531	1.40428
				0.832658	0.157677	2.40681
				0.832658	0.196341	1.66527
				0.832658	0.242854	1.7377
				0.832658	0.272858	0.785015
				0.832658	0.407222	1.89057
				0.832658	0.0920279	0.65679
				0.832658	0.447811	2.45748
				0.832658	0.0796891	0.555089
				0.832658	0.430625	1.42605
				0.832658	0.0553201	1.46863
				0.832658	0.0343247	0.65679
				0.832658	0.376121	1.24122
				0.832658	0.343074	1.64666
				0.832658	0.121941	1.38216
				0.845299	0.346023	0.496487
				0.845299	0.439578	1.33683
				0.845299	0.14578	1.51001
				0.845299	0.134806	0.82333
				0.845299	0.187802	0.82333
				0.845299	0.199213	0.555089
				0.845299	0.336747	1.21614
				0.845299	0.249123	0.65679
				0.845299	0.371239	1.93884
				0.845299	0.207205	0.961443
				0.845299	0.131665	1.38216
				0.845299	0.133668	1.05321
				0.845299	0.118099	0.895054
				0.845299	0.438505	1.80724
				0.863936	0.252893	1.46863
				0.863936	0.190071	1.19053
				0.863936	0.26496	1.53028
				0.863936	0.173585	0.60807
				0.863936	0.118853	0.60807
				0.863936	0.307225	1.05321
				0.863936	0.310864	1.98595
				0.863936	0.202177	2.26161
				0.863936	0.0881354	0.555089
				0.863936	0.135504	0.496487
				0.863936	0.312212	1.2658
				0.863936	0.113047	0.74473
				0.872479	0.0244974	0.85994
				0.872479	0.030471	0.60807
				0.872479	0.22293	1.35969
				0.872479	0.697476	1.58953
				0.872479	0.135651	0.702138
				0.872479	0.103285	1.58953
				0.872479	0.347263	1.4475
				0.892995	0.220463	1.38216
				0.892995	0.254174	1.38216
				0.892995	0.13459	1.02353
				0.892995	0.216505	1.16436
				0.892995	0.212226	0.928842
				0.892995	0.148855	1.28991
				0.892995	0.0998121	1.19053
				0.900074	0.160711	0.74473
				0.900074	0.185569	1.53028
				0.900074	0.0473849	0.961443
				0.900074	0.0411557	0.65679
				0.900074	0.213781	1.68367
				0.900074	0.177288	1.48946
				0.900074	0.172108	0.74473
				0.900074	0.29553	2.31546
				0.900074	0.163949	1.97037
				0.900074	0.230616	1.40428
				0.900074	0.222075	0.992974
				0.980937	0.216822	1.2658
				0.980937	0.153494	0.496487
				0.980937	0.217539	0.895054
				0.980937	0.440185	2.26161
				0.980937	0.383557	1.75535
				0.980937	0.28322	2.63886
				0.993559	0.332502	0.82333
				0.993559	0.372549	1.11018
				0.993559	0.310985	0.85994
				0.993559	0.350483	1.13759
				0.993559	0.202644	0.74473

## Sheet: 4i
					2019-05-29							2019-06-30							2019-07-03
	SUMMARY				1.4 kPa			6.5 kPa				1.4 kPa			6.5 kPa				1.4 kPa			6.5 kPa
	% Cups With Teeth				Image #	Total Cups	Cups With Teeth	Image #	Total Cups	Teeth Cups		Image #	Total Cups	Teeth Cups	Image #	Total Cups	Teeth Cups		Image #	Total Cups	Teeth Cups	1	4	2
EXPT	1.4 kPa	6.5 kPa			1	2	2	1	4	2		1	5	2	1	15	6		1	3	3	2	5	1
2019-05-29	81.0345	25.4545			2	2	2	2	4	0		2	5	4	2	9	4		2	6	4	3	5	2
2019-06-30	80.7692	40.4494			3	3	1	3	8	0		3	5	3	3	9	6		3	6	5	4	4	1
2019-07-03	67.1642	28.9157			4	3	3	4	10	3		4	4	4	4	8	7		4	8	8	5	5	0
					5	3	2	5	4	1		5	6	4	5	11	2		5	9	4	6	10	3
					6	5	4	6	2	2		6	4	3	6	3	0		6	6	4	7	10	1
					7	4	4	7	7	3		7	6	6	7	4	0		7	8	6	8	9	6
					8	2	2	8	5	0		8	3	3	8	10	4		8	7	4	9	20	4
					9	2	2	9	8	3		9	4	4	9	5	2		9	8	4	10	11	4
					10	3	3	10	9	1		10	5	5	10	4	3		10	6	3		83	24
					11	5	5	11	7	2		11	2	2	11	4	1		TOTALS	67	45
					12	3	2	12	7	2		12	3	2	12	7	1
					13	4	3	13	5	1		TOTALs	52	42		89	36
					14	4	3	14	6	1
					15	3	2	15	6	2
					16	3	2	16	5	2
					17	4	3	17	8	2
					18	3	2	18	5	1
					TOTALs	58	47		110	28

## Sheet: 4j
	Simulations
	Effective tooth depth (mm)										Experimental data*
	0.141866	0.160793	0.179146	0.197599	0.214442	0.230364	0.245801	0.260547				Fraction engulfed bin center	Rim tooth depth	Rim tooth diameter	Constriction magnitude
	0.142309	0.161036	0.179265	0.195889	0.211673	0.226841	0.241584	0.255385					(mm)	(mm)	(mm)
	0.1432	0.161316	0.17795	0.193646	0.208669	0.223283	0.236943	0.249989			bin 1	0.22	0.162	0.47	0.076
	0.14341	0.160439	0.176204	0.191254	0.20579	0.219377	0.232559	0.247235			bin 2	0.44	0.169	0.525	0.092
	0.142946	0.159145	0.174379	0.188947	0.202575	0.215657	0.230371	0.244945			bin 3	0.6	0.198	0.54	0.183
	0.141879	0.157666	0.17248	0.186321	0.199363	0.213702	0.228402	0.242653			bin 4	0.76	0.191	0.565	0.211
	0.140956	0.155931	0.170184	0.183594	0.197537	0.212118	0.226393	0.240187			bin 5	0.92	0.224	0.6	0.207
	Tooth radius (mm)
	0.4	0.4	0.4	0.4	0.4	0.4	0.4	0.4			*Non-binned experimental data is provided in Source Data - Fig S7
	0.45	0.45	0.45	0.45	0.45	0.45	0.45	0.45
	0.5	0.5	0.5	0.5	0.5	0.5	0.5	0.5
	0.55	0.55	0.55	0.55	0.55	0.55	0.55	0.55
	0.6	0.6	0.6	0.6	0.6	0.6	0.6	0.6
	0.65	0.65	0.65	0.65	0.65	0.65	0.65	0.65
	0.7	0.7	0.7	0.7	0.7	0.7	0.7	0.7
	Constriction magnitude (mm)
	0.0489997	0.0579519	0.0669797	0.0764343	0.0858604	0.0949001	0.104572	0.113909
	0.0509809	0.0601727	0.0694667	0.078831	0.0881537	0.0973742	0.107041	0.116516
	0.0531396	0.0622895	0.071509	0.0807578	0.0898297	0.0994433	0.109044	0.11848
	0.0548049	0.0639318	0.0730111	0.0821943	0.0916688	0.101191	0.111001	0.123566
	0.0559318	0.0651864	0.0744604	0.0838002	0.0931978	0.102788	0.115493	0.128374
	0.0569493	0.0663973	0.0757157	0.0850196	0.0943032	0.106438	0.119489	0.132457
	0.0578835	0.0669772	0.0761423	0.0857506	0.0971886	0.110023	0.122905	0.135531

## Sheet: 4 - S1d
	*data is included in Source Data Figure 4

## Sheet: 4- S1e
	Great circle distance from cup rim for individual teeth (mm)						The threshold for distinguishing teeth in the rim of the cup from those (further) inside the cup was set at 5.9 mm
	DMSO	CK666	Blebbistatin	SMIFH2
	1.27931	1.03908	1.71474	3.26787
	2.18362	2.15513	3.21957	0.914585
	1.43504	2.64286	4.02985	1.66615
	2.2503	3.88591	1.33997	2.35124
	1.96664	3.58865	2.07544	4.75407
	4.95458	0.842811	0.864429	3.76718
	3.83347	1.50572	3.69081	3.09407
	1.32673	1.809	2.50689	1.44248
	3.63568	3.78274	3.01185	1.95576
	4.14858	1.54794	5.82866	5.13099
	3.55327	3.43773	5.5731	2.01557
	2.6434	4.58895	1.68118	1.87292
	4.6402	2.29297	1.75614	1.53783
	1.36076	6.4944	6.21359	3.29269
	1.92476	2.51388	1.34578	1.50767
	3.20845	2.61528	1.33255	2.94447
	2.5712	3.20986	3.08347	2.65051
	3.07561	2.92885	3.33099	6.21878
	4.35691	3.04243	3.32637	5.9288
	2.5934	5.69582	3.30036	1.97339
	1.69949	4.5369	3.11311	2.39939
	6.34128	2.50607	2.87017	2.05765
	2.77352	4.64124	4.13418	2.05522
	1.02032	3.4929	6.06079	3.5874
	0.797078	2.26986	4.87917	1.37804
	1.87775	3.59186	4.20836	4.49867
	1.75605	3.07958	4.56756	7.66883
	1.25513	4.7285	2.73043	4.7791
	1.84464	2.56328	4.26629	2.52672
	3.07791	2.67378	5.37581	4.43512
	5.05554	4.94587	1.90911	2.61979
	1.6064	5.32818	3.48743	5.66878
	5.41711	7.79921	7.05847	1.14252
	1.50936	3.6354	5.37692	0.958387
	4.70983	3.86866	3.3531	6.78161
	3.33245	9.45076	6.05848	5.33556
	6.44176	7.51001	5.31362	1.45182
	3.54672	5.7499	2.05695	4.36377
	2.73246	3.15931	3.94323	1.51358
	5.35103	4.85503	4.79216	2.38857
	4.5169	5.3515	7.22496	7.09659
	2.93736	4.56585	7.95694	3.22187
	3.98177	5.43403	4.70825	4.61746
	2.28909	3.72359	4.00703	2.97143
	2.16717	0.769045	8.0518	4.28879
	1.75474	2.20082	6.46706	2.51257
	5.52631	3.30081	0.955361	1.6349
	0.60109	4.39061	8.37899	5.48317
	2.81069	1.75369	4.48118	3.94904
	1.29187	4.50404	8.56014	1.61052
	3.68681	5.08668	9.14907	1.53047
	2.88754	7.80917	2.79122	9.84894
	3.33992	7.57596	1.44616	6.09338
	3.65387	2.59042	8.79304	2.63035
	3.68813	9.58083	2.78228	2.40362
	5.14228	5.92026	3.52122	2.33917
	3.33338	3.29957	2.89758	3.31925
	7.02639	3.78168	5.86051	4.93283
	1.80139	4.95391	3.36799	3.05094
	6.91292	3.78307	4.86275	2.28487
	4.39689	6.21811	3.03139	2.34396
	3.69106	5.87561	2.132	5.15071
	3.50895	4.4408	1.35406	4.53018
	3.13683	4.91025	2.69339	7.21817
	1.70564	3.97917	3.05266	3.84266
	3.43967	1.37385	4.81524	6.88983
	3.91756	2.13716	4.6895	5.83313
	1.99044	3.48877	6.47072	8.13319
	1.29263	4.78222	3.26343	4.27402
	3.88981	1.25151	3.08643	6.76255
	1.06552	6.43185	2.44615	3.76678
	4.2446	4.456	2.53619	6.50995
	1.64225	4.23588	4.33826	2.78066
	4.76208	6.34007	4.81957	3.86138
	2.80114	4.26115	5.70211	3.14087
	3.61167	4.77608	6.04364	3.18816
	2.00227	2.28154	14.3407	0.843763
	2.68459	3.04116	10.5488	4.23716
	3.26818	5.90199	5.88651	1.34618
	3.69883	4.50033	10.0168	5.09407
	1.73434	6.35234	2.35759	1.89222
	2.59562	2.50942	4.99952	5.6517
	4.08363	10.8478	6.86056	1.18802
	3.01451	3.45997	1.94546	3.66318
	2.09276	7.20825	3.39024	2.06186
	1.60016	4.4523	1.90534	2.33568
	6.82698	6.02397	1.60358	6.92397
	1.27663	6.5999	2.80433	2.63138
	6.00199	7.03267	6.17271	2.98894
	1.76903	5.50385	7.39047	3.66111
	4.31155	10.197	4.48887	6.28308
	3.80369	6.1446	3.41966	2.53057
	5.63092	6.8895	8.18536	8.9739
	3.42962	6.31451	3.60771	2.29881
	4.84652	6.50789	8.85178	3.95519
	0.884508	4.99235	6.23535	2.6581
	1.55493	6.41383	7.06502	1.4027
	8.98886	3.00442	9.44091	3.74695
	5.22281	5.33005	7.16069	2.14907
	2.20436	5.12509	8.12588	3.53909
	6.04625	5.13397	8.31998	4.76591
	2.28113	4.78964	10.3086	9.57079
	5.08266	8.38798	4.28546	6.33822
	4.54117	2.36958	9.09519	8.24388
	2.91377	2.56792	10.6098	5.70832
	2.92885	4.98239	8.47977	4.59781
	4.05029	2.94547	4.60384	2.48916
	6.6639	1.79269	3.6121	2.52959
	7.11337	2.6612	4.08299	1.75758
	3.54547	5.49405	3.67913	3.52649
	7.74234	5.39456	2.36273	3.98037
	9.43077	3.68943	2.98497	2.29413
	7.66753	4.38437	2.44679	5.18179
	10.4882	2.694	5.21978	1.82877
	5.71429	2.76433	5.0641	5.1187
	8.75156	2.4702	4.99086	4.69739
	8.63943	3.18533	5.04092	3.64212
	8.33595	6.39122	7.33775	2.44976
	3.20296	4.53961	5.77743	8.13656
	3.46587	4.6837	3.41625	2.37943
	3.51747	4.4302	2.43292	4.76783
	2.39594	4.00415	4.04473	3.81287
	2.46512	3.9012	1.8924	5.98553
	5.22073	4.63884	2.44529	7.15582
	1.75541	5.89723	8.15047	7.21881
	3.49422	5.63297	3.01701	3.48551
	5.17043	4.40873	4.74088	4.28552
	2.02672	5.63706	4.25453	5.14116
	8.01657	6.07867	3.16026	6.29855
	4.05442	7.50925	6.02701	3.51539
	6.1837	7.12647	1.8377	2.98896
	3.67047	6.09959	2.45316	3.20128
	2.21056	7.30523	3.60801	1.56411
	4.42427	5.41541	1.89512	1.64191
	5.91157	4.43157	6.05642	1.64999
	3.51476	3.19956	9.72602	1.91784
	2.90283	4.09639	3.2082	2.69894
	5.79866	3.04424	4.03707	2.90311
	4.56986		12.6213	1.68177
	4.44742		2.14736	4.16124
	6.89294		6.68956	3.0454
	4.32901		6.90418	7.44837
	3.26269		2.27449	8.83018
	8.55986		8.89935	4.85175
	5.8541		3.84592	5.10041
	11.5611		8.80848	4.1083
	6.21792		11.2817	3.75524
	12.6583		7.22133	5.29826
	7.94		12.1996	1.75718
	2.00704		8.28273	4.50446
	6.32985		7.61203	2.4209
	9.89282		5.1759	3.2605
	5.90511		3.99375	2.11492
	2.61262		2.90745	4.01514
	8.08595		7.05145	3.99908
	5.15474		9.85448	6.81912
	7.48792		7.29306	3.23746
	7.98487		3.50891	4.31085
	2.25038		6.17591	7.8288
	4.1635		9.01568	7.73682
	2.65991		3.54609	4.38817
	2.52787		10.2862	3.47385
	4.12971		2.50203	1.41044
	2.51211		6.64813	11.1026
	2.881		6.6997	4.34867
	5.20727		3.71547	11.9062
	5.7058		5.23788	12.86
	5.10273		1.29191	8.76549
	4.31254		4.50856	11.5823
	2.78358		3.21962	7.95271
	6.64741		2.07472	12.1966
	5.25752		1.22738	7.49676
	3.26651		3.2477	4.70117
	1.51522		3.41243	2.30328
	1.93486		2.84536	6.20928
	2.81278		5.78119	3.91787
	3.59154		0.884606	10.3372
	4.1327		8.37894	8.59477
	3.94991		6.46018	1.50226
	3.28847		0.311136	9.34049
	3.03502		5.70165	5.45481
	3.57888		0.936198	2.38452
	2.51131		0.809369	1.81897
	2.31945		5.05148	4.68088
	3.82801		4.77961	4.70247
	5.7551		6.99875	5.89642
	3.88698		4.92832	5.55168
	6.57445		4.99319	5.86101
	11.5429		6.95518	5.09236
	4.27204		10.8267	7.95105
	4.18535		5.72885	5.74204
	4.35405		3.84536	8.29906
	5.78444		8.54097	1.58042
	5.60597		8.42784	3.84732
	6.32396		18.735	6.6909
	3.68683		14.7468	5.3834
	1.78628		4.02958	9.92974
	7.14816		3.90919	8.63221
	7.75919		5.68183	8.1626
	7.13613		4.1837	6.45707
	3.24587		11.2956	6.7837
	3.91092		10.6194	7.91758
	6.32148		14.5066	9.94791
	3.13579		8.30713	4.68415
	2.52741		15.6613	6.77956
	2.79759		5.60369	7.6739
	7.88786		13.5194	6.1561
	5.69197		13.792	5.85394
	8.13156		7.64065	4.60875
	3.37212		10.0569	3.10667
	7.11491		2.24145	16.0033
	11.5637		5.42154	4.51609
	8.10255		7.68526	15.3135
	10.5168		7.94892	2.22959
	2.80999		4.86537	2.97813
	5.06885		4.91375	5.77186
	5.96806		4.43397	2.78848
	8.73667		2.85567	3.7118
	3.67464		3.0291	3.2766
	1.47492		3.76086	7.32221
	5.18256		3.31053	9.88746
	2.22128		10.203	2.53033
	7.84318		3.24987	13.4503
	2.46362		5.60886	13.5677
	6.75003		3.75839	13.3422
	3.58712		2.19118	20.9038
	2.3095		8.29427	11.994
	3.66622		2.09942	14.9559
	6.56081		7.54373	16.8172
	2.30311		3.21704	13.8047
	5.962		6.98755	3.13833
	4.14509		4.77321	6.86771
	7.98533		11.2088	9.60385
	12.8204		14.0504	8.24236
	12.6098		12.565	6.19629
	7.7776		8.19476	2.04261
	6.22039		4.19581	2.52832
	5.09311		9.60799	5.44852
	12.5479		2.87952	4.10519
	3.22352		13.2248	3.41339
	5.68437		8.43017	3.40274
	2.75214		4.97135	1.97648
	4.89278		15.4811	2.56114
	4.40453		4.18675	3.82638
	3.26474		14.732	15.0887
	5.09232		6.76911	4.644
	2.68279		9.89816	14.7479
	2.0272		7.58451	5.51543
	2.27977		7.6264	7.52418
	4.3475		2.25335	7.76122
	1.93998		4.36016	7.44988
	4.14556		4.23145	7.40716
	2.32933		5.63929	6.40916
	4.89962		2.55209	2.67606
	4.48971		6.5089	1.85837
	2.67476		3.41438	2.65212
	6.44253		5.95441	3.45425
	3.38544		4.07026	5.44683
	6.26391		5.48739	1.09507
	4.89718		5.713	8.97364
	1.97567		2.75616	5.54492
	2.40307		5.1202	4.64485
	2.22627		4.3707	4.2846
	4.06587		4.94066	3.88875
	3.95992		5.20445	3.19459
	2.98349		3.48749	2.8443
	3.5003		6.00434	2.43665
	6.55065		2.94356	9.35421
	3.44428		2.69566	6.63776
	2.77693		7.71362	8.24089
	2.54401		3.28628	3.95999
	1.88		2.77513	14.9129
	2.30613		6.04627	3.37578
	2.26448		1.70094	3.57048
	4.89669		9.41529	11.2191
	2.03526		6.79154	10.2367
	6.33372		20.6066	2.94457
	3.24219		5.72734	10.163
	2.70731		5.25763	3.23685
	6.07047		6.82316	9.11047
	8.01455		6.79113	6.29906
	2.59637		10.9551	7.99479
	2.58322		12.0773	4.11498
	5.66962		4.63647	12.7539
	10.4589		10.8826	1.58227
	7.76664		16.077	7.62514
	2.42167		9.27809	3.2295
	11.8039		13.7286	15.8589
	2.20515		13.2225	14.8828
	3.64886		4.5547	6.33217
	7.15504		5.51791	3.79135
	3.9264		10.9058	10.6001
	2.96274		9.74973	9.82715
	1.98965		6.87763	2.92901
	4.74743		2.72573	5.16233
	5.16307		6.29245	4.80928
	6.68082		4.9593	10.5209
	4.81814		4.77731	8.73535
	5.99067		3.84781	4.65659
	9.19753		2.96991	3.67624
	10.2555		2.89407	9.33313
	12.453		5.27178	4.05972
	10.5821		9.6451	3.51642
	14.8812		11.4675	2.77098
	7.12651		15.6301	2.96107
	10.9849		6.42834	5.19815
	5.03025		11.7569	5.55719
	4.99893		14.6565	5.956
	15.2178		8.22531	6.53385
	5.49255		5.73768	6.20432
	11.2004		3.47205	5.28243
	14.8053		8.60292	5.93611
	3.61263		16.5486	6.28256
	7.97185		18.7228	5.34755
	14.5732		2.26055	2.39383
	10.4162		16.9125	3.07249
	3.59145		13.763	3.31459
	2.85873		9.5235	2.23991
	8.76644		5.49045	2.94962
	5.28626		4.5739	3.53738
	1.80324		6.91923	4.69972
	5.87338		4.36439	2.46694
	1.91564		8.23484	5.42261
	4.68418		4.81487	1.20867
	3.12681		4.85252	2.41206
	3.31315		11.81	2.0014
	4.75956		10.8606	4.37893
	2.07849		5.79285	3.18731
	5.25939		19.3722	2.18867
	3.64788		16.1065	2.92751
	6.15047		16.3927	3.47374
	4.56489		7.69603	4.73143
	1.10564		12.1696	1.52506
	3.70685		17.5795	1.77696
	7.63219		16.1148	4.46868
	6.39751		10.7411	2.66464
	5.62543		10.0898	2.10099
	4.76806		9.1956	8.3882
	7.74972		9.16916	1.86639
	3.73988		11.5724	1.33729
	7.37932		2.58898	5.8565
	3.78591		2.57499	5.50064
	9.2007		5.10318	4.51023
	2.53919		5.84341	4.45588
	2.53325		12.8547	3.65491
	3.26807		4.25826	3.19305
	13.7295		4.87336	1.72275
	15.0615		7.76472	3.34614
	5.30745		0.819802	5.09645
	14.63		15.3249	8.18367
	5.69927		0.575809	12.5367
	12.2031		1.39077	5.39118
	1.54924		3.80496	8.11067
	7.5049		5.28816	2.88073
	1.67487		7.77449	1.74714
	1.45889		11.0223	5.89741
	5.26079		14.0963	2.05374
	2.24872		3.06355	2.07434
	4.72279		6.67912	2.0067
	3.07393		6.21107	8.72124
	9.31121		6.64821	2.93042
	5.55176		6.86633	4.12667
	2.1634		6.53515	6.20048
	5.69115		10.4217
	2.05007		21.8375
	5.14899		5.02401
	5.68591		7.22758
	5.73674		3.94353
	5.4404		9.23245
	5.35824		14.0292
	3.22451		14.1196
	7.74903		5.69561
	3.47081		2.85862
	5.39365		4.51268
	3.16385		6.96307
	9.00858		7.95955
	6.4284		7.38141
	5.72564
	4.44645
	3.8504
	4.21954
	7.04244
	5.79265
	13.132
	6.58588
	5.22229
	9.91672
	5.3411
	4.79416
	3.54767
	6.79537
	4.77592
	10.9874
	8.5319
	4.35695
	8.37141
	6.15423
	6.57659
	2.29182
	6.47681
	2.1732
	8.62229
	2.34167
	1.77216
	10.0687
	2.36898
	9.74701
	4.17746
	4.92634
	8.20887
	9.63883
	3.90513
	4.76409
	9.95941
	3.26354
	3.1769
	6.28744
	5.92171
	10.6909
	7.06577
	4.56312
	11.728
	4.26952
	11.8314
	3.48514
	9.03819
	12.7704
	3.18577
	2.2321
	1.99187
	1.36212
	1.87497
	3.27919
	5.34807
	2.80515
	4.39601
	4.01671
	4.39258
	3.4375
	3.3468
	4.4531
	4.86549
	5.30303
	5.5795
	10.8359
	8.04523
	9.99244
	6.95101
	10.3536
	11.8846
	8.06237
	3.42235
	1.73807
	2.42843
	6.75033
	7.70252
	2.64013
	7.8431
	3.20667
	6.40344
	12.0518
	5.92313
	1.35003
	4.00517
	3.81814
	3.46794
	6.37025
	7.12492
	5.52169
	6.14399
	9.76848
	4.96086
	4.06142
	5.8402
	1.53261
	9.87603
	3.51926
	5.38171
	6.78071
	4.72895
	5.90728
	4.0776
	4.29852
	14.8369
	15.3616
	4.75508
	14.0427
	13.0837
	8.29169
	9.68593
	4.56075
	6.73691
	4.92364
	9.06391
	2.73334
	3.13604
	2.11502
	7.08564
	9.66141
	9.40965
	12.7462
	6.77197
	11.8176
	7.74801
	8.61065
	7.72726
	9.44611
	5.3986
	3.36724
	1.69179
	7.80139
	1.69377
	4.40406
	9.23438
	4.08564
	3.04918
	6.45946
	4.3732
	12.7253
	10.5713
	1.18661
	4.7803
	2.33556
	6.86587
	2.24776
	3.94733
	1.23688
	3.1863
	6.1011
	3.15421
	3.71436
	4.16237
	3.45152
	9.28202
	9.12474
	6.32881
	5.48082
	3.77971
	2.1706
	2.50801
	8.04631
	4.27947
	2.22755
	12.1946
	3.46847
	2.42396
	5.70224
	4.00158
	5.67801
	3.78188
	3.16493
	10.2673
	2.66682
	3.41443
	7.08371
	2.13106
	2.99114
	3.93577
	11.1084
	4.05531
	4.78076
	4.72005
	4.41645
	10.464
	5.38183
	9.90809
	3.61263
	7.81072
	2.68571
	7.58213
	4.61894
	4.57628
	3.35207
	9.40736
	3.44377
	4.42054
	4.86699
	5.33637
	4.09356
	4.6263
	2.70262
	1.8764
	1.76552
	2.54008
	5.13661
	5.04661
	4.63984
	3.94191
	3.59127
	4.31282
	4.00491
	2.50206
	4.42242
	7.49589
	5.4678
	3.59433
	7.34681
	3.35999
	2.9763
	2.19981
	2.83423
	7.49261
	2.48356
	8.50042
	2.43473
	3.11914
	6.03041
	4.6312
	1.27792
	5.19699
	0.984024
	4.53886
	2.65624
	1.76405
	4.79353
	5.91747
	3.00821
	4.70057
	3.76197
	7.32436
	8.5765
	2.79966
	5.98403
	2.6171
	14.148
	3.1281
	11.4819
	4.85508
	4.04028
	8.17465
	4.47053
	2.84493
	2.63596
	5.90897
	8.84457
	6.24144
	7.26355
	3.0757
	1.45955
	2.10331
	4.08141
	3.90084
	1.47609
	9.88724
	4.45823
	3.12882
	7.05736
	3.68894
	5.94791
	2.50181
	1.06617
	5.77798
	11.5673
	5.45637
	3.57555
	8.88449
	4.40762
	7.61268
	1.4574
	8.83557
	14.3557
	19.3296
	2.51136
	8.01243
	3.35917
	5.39224
	5.70323
	4.70534
	16.8874
	10.9091
	13.8464
	18.4191
	6.97519
	3.05343
	19.9367
	3.66845
	5.92006
	19.0788
	3.49978
	19.3824
	3.26457
	18.3862
	11.702
	14.2203
	10.7021
	10.2703
	9.90052
	6.0184
	8.61922
	2.57516
	3.46078
	4.13284
	2.58001
	9.33438
	2.86642
	6.61636
	4.75474
	4.41892
	4.94218
	4.29426
	2.79918
	1.46214
	0.769992
	1.82336
	5.94576
	6.14742
	2.38343
	7.57933
	14.2821
	2.53888
	1.77376
	8.64618
	1.78137
	2.88517
	9.70848
	1.66741

## Sheet: 4 - S1f & g
	*NaN indicates that no rim teeth, or no overall target constriction, were detected for a particular phagocytic event
	DMSO				CK666				Blebbistatin				SMIFH2
	Number of rim teeth	Rim tooth diameter	Rim tooth depth	Constriction magnitude (mm)	Number of rim teeth	Rim tooth diameter	Rim tooth depth	Constriction magnitude (mm)	Number of rim teeth	Rim tooth diameter	Rim tooth depth	Constriction magnitude (mm)	Number of rim teeth	Rim tooth diameter	Rim tooth depth	Constriction magnitude (mm)
		(mm)	(mm)			(mm)	(mm)			(mm)	(mm)			(mm)	(mm)
	4	0.834392	0.090666	NaN	0	NaN	NaN	NaN	0	NaN	NaN	0.0139449	3	1.09761	0.117985	NaN
	7	1.05972	0.214324	0.119223	1	0.60807	0.0644801	NaN	6	0.865914	0.140995	NaN	2	1.02916	0.10285	0.0319952
	6	1.04379	0.246218	0.074827	2	0.872832	0.167422	NaN	5	0.639674	0.207125	NaN	4	0.768352	0.0933152	0.0407856
	5	0.75616	0.153167	0.0367408	0	NaN	NaN	NaN	8	1.11716	0.155264	0.148592	5	1.06255	0.224581	NaN
	6	0.88475	0.156372	0.12958	1	0.555089	0.192346	0.0214871	3	0.843546	0.163227	0.0311195	7	1.19346	0.178966	0.0789385
	10	0.95222	0.158923	0.123597	5	0.67518	0.153076	0.0341216	0	NaN	NaN	0.0425918	3	0.89648	0.130739	0.0442148
	0	NaN	NaN	0.0288271	0	NaN	NaN	0.0187328	1	1.02353	0.101945	0.0201592	3	1.00397	0.233991	0.0741218
	3	0.881382	0.172244	0.108486	2	0.620609	0.0700638	NaN	7	0.80264	0.152071	0.0328235	0	NaN	NaN	0.0336305
	9	1.05486	0.206976	0.0427487	0	NaN	NaN	0.0364081	7	0.825144	0.190644	0.0622387	9	0.892459	0.170201	0.0542568
	10	0.858503	0.117118	0.00982458	1	0.555089	0.239362	0.0206971	4	0.539033	0.193284	0.048165	2	0.830426	0.224496	0.0133908
	11	1.01011	0.152607	0.102596	1	0.496487	0.132903	NaN	2	0.798596	0.0615061	0.0352801	1	1.02353	0.274536	NaN
	7	0.882381	0.108279	0.0577686	0	NaN	NaN	0.0245505	3	0.699177	0.0914094	0.0581462	3	0.671006	0.106073	NaN
	9	1.07741	0.157781	0.041011	0	NaN	NaN	0.00709893	2	0.581579	0.139306	NaN	0	NaN	NaN	0.0135536
	9	1.30821	0.202017	0.0771697	0	NaN	NaN	0.00845191	0	NaN	NaN	NaN	13	0.999067	0.165573	NaN
	4	1.2941	0.15694	0.0577764	5	0.90206	0.162378	0.057419	0	NaN	NaN	0.0391319	3	0.95046	0.173866	0.0757568
	5	0.785396	0.217449	0.0581765	5	0.95125	0.148271	0.0447274	4	0.660367	0.199536	0.0539413	6	0.99969	0.121099	0.0297484
	12	1.14246	0.157786	0.205475	0	NaN	NaN	0.052642	10	1.2517	0.146161	0.0831094	11	1.20971	0.147709	NaN
	9	0.8227	0.145155	0.127942	4	0.941185	0.123975	0.02993	3	0.60665	0.127188	0.0294058	2	0.74006	0.126264	0.136848
	8	0.884517	0.160036	0.0794006	0	NaN	NaN	NaN	1	1.33683	0.18066	0.0433651	0	NaN	NaN	0.0323536
	9	0.949088	0.183057	0.223096	1	0.785015	0.135915	NaN	0	NaN	NaN	0.0501641	2	0.824882	0.108621	0.0265432
	1	0.496487	0.196006	0.198624	0	NaN	NaN	0.00906474	1	0.65679	0.1287	0.0169423	5	1.06973	0.11852	0.0513243
	8	1.02122	0.190674	0.324625	0	NaN	NaN	0.012639	3	0.754739	0.108652	0.0644425	11	1.12848	0.155166	0.0735521
	5	0.934664	0.193349	0.201669	0	NaN	NaN	0.0107854	1	0.74473	0.0884882	NaN	5	0.704137	0.164417	0.0262638
	8	0.986645	0.137	0.145573	2	0.762734	0.135183	0.0281185	3	0.62289	0.269358	0.0717107	10	1.28002	0.185206	0.142767
	7	0.91748	0.175511	0.072398	1	1.16436	0.188539	0.0299622	4	0.828794	0.144049	0.0438202	0	NaN	NaN	0.0138499
	5	1.06324	0.194023	0.0796207	1	0.555089	0.113572	0.0385852	0	NaN	NaN	0.0550044	2	1.0834	0.187256	0.0677036
	9	1.11654	0.174124	0.126623	1	0.928842	0.233384	0.0318624	1	1.31358	0.27691	0.0620266	11	1.2667	0.208225	0.335696
	6	0.827301	0.120971	NaN	1	0.702138	0.133649	0.022408	3	0.79713	0.131786	0.035288	3	0.938984	0.152218	0.0629897
	11	1.17415	0.190651	0.256822	4	0.86552	0.101241	0.0761369	2	0.725072	0.164604	0.0798138	10	1.05267	0.145135	0.81328
	1	0.702138	0.113669	NaN	4	0.761371	0.151875	0.0299065	10	1.37536	0.253592	0.0480846	3	0.891356	0.163317	0.030051
	11	0.978563	0.135634	0.185322	0	NaN	NaN	0.0283831	1	0.60807	0.230876	0.0326981	1	0.85994	0.19683	0.0568992
	8	1.55433	0.30674	0.326367	1	0.65679	0.178573	NaN	9	1.29803	0.250222	0.357697	11	0.97763	0.225228	0.238573
	12	1.18988	0.203724	0.0965669	0	NaN	NaN	0.0512852	0	NaN	NaN	0.018375	1	1.02353	0.0813404	0.0110347
	5	0.935	0.29114	0.128212	0	NaN	NaN	NaN	10	1.56697	0.331443	0.368892	7	0.934403	0.207688	0.117323
	8	1.4111	0.254749	0.106826	0	NaN	NaN	NaN	0	NaN	NaN	0.0373483	0	NaN	NaN	0.0285991
	13	1.06662	0.241336	0.397712	1	0.60807	0.214681	0.0324711	8	1.28834	0.311545	0.288054	2	0.803333	0.111021	NaN
	8	1.11991	0.207727	0.121304	1	0.85994	0.101274	0.037421	2	0.670052	0.176811	0.124504	8	1.36703	0.23322	0.188715
	2	0.764872	0.141266	0.126049	0	NaN	NaN	NaN	7	0.927436	0.157654	0.089463	3	0.764264	0.233086	0.332608
	11	1.00279	0.147629	0.204763	0	NaN	NaN	0.020927	5	0.770598	0.206685	0.0966025	1	0.65679	0.0844775	0.0370366
	11	1.15634	0.146426	0.12147	3	0.94635	0.0999042	0.0382141	5	1.01737	0.323135	0.0916476	2	0.893199	0.153358	0.0608276
	6	0.88232	0.164158	0.0860742	0	NaN	NaN	0.0162028	0	NaN	NaN	0.0954489	8	1.24077	0.213821	0.363718
	5	1.30914	0.212125	0.244645	2	1.08503	0.192361	0.0568758	0	NaN	NaN	0.11658	3	0.991371	0.180516	0.129527
	9	1.43547	0.197937	0.141289	0	NaN	NaN	NaN	5	1.27476	0.147857	0.042174	13	1.33421	0.238694	0.504623
	12	1.09527	0.16936	0.223515	10	1.35991	0.208285	0.130149	2	0.789311	0.193033	0.0725812	10	1.15941	0.305357	0.17539
	10	1.20196	0.170332	0.227121	9	0.89096	0.119374	0.0938538	2	0.576639	0.174174	0.0341111	3	0.887184	0.361255	0.150131
	1	0.895054	0.175308	0.0268679	2	0.695771	0.121378	0.0546294	2	0.628614	0.0814297	0.0841426	2	0.840162	0.216675	0.202409
	10	1.28046	0.140455	0.281079	1	0.555089	0.197239	0.0322441	9	1.05351	0.245456	0.068407	1	1.4475	0.258667	NaN
	4	0.714635	0.184354	0.108939	0	NaN	NaN	0.0218769	6	0.882754	0.153987	0.0536383	7	0.807053	0.187605	0.346464
	4	0.89791	0.123703	0.142195	3	0.904828	0.178182	0.0272074	10	1.35592	0.190178	0.279265	7	1.37436	0.237797	0.274121
	3	0.997018	0.154732	0.190291	0	NaN	NaN	0.0567746	4	0.718183	0.130145	0.131277	12	0.973911	0.194866	0.420927
	3	0.89993	0.156811	0.107983	2	1.21391	0.19346	0.0522747	1	0.928842	0.22706	0.0719883	8	1.17147	0.177788	0.414408
	5	1.05797	0.262726	0.236802	1	0.85994	0.0790273	0.106296	7	1.27524	0.255035	0.0909377	0	NaN	NaN	0.0894748
	0	NaN	NaN	0.177335	1	1.19053	0.15276	0.0544205	2	0.728965	0.194405	0.119726	9	1.30879	0.382115	0.290099
	12	0.895348	0.139775	0.316418	3	1.10133	0.188829	NaN	0	NaN	NaN	0.102587	7	1.41404	0.372729	0.120102
	10	1.18796	0.363022	0.329117	8	1.07567	0.189612	0.194082	3	1.02451	0.103644	0.153372	5	1.12869	0.235817	0.196931
	12	1.06009	0.225555	0.26295	7	0.992369	0.198912	NaN	0	NaN	NaN	0.0709974
	10	1.30353	0.295751	0.138791	0	NaN	NaN	0.115377	0	NaN	NaN	0.104368
	9	1.03296	0.168428	0.284321	2	1.10432	0.111898	0.0478147	1	0.85994	0.280015	0.0736322
	11	1.16213	0.146952	0.228088	6	0.962329	0.151188	0.163915	2	0.628614	0.290202	0.0271121
	8	1.08845	0.139072	0.209213	3	0.701595	0.0979701	0.0884392	4	1.22734	0.194842	0.152654
	14	1.42687	0.232706	0.553442	1	0.702138	0.0860441	NaN	0	NaN	NaN	0.0741732
	14	1.104	0.245675	0.293542	2	1.23437	0.159651	0.0424345	0	NaN	NaN	0.0172469
	12	1.14737	0.205794	0.204129	3	0.72869	0.161836	NaN	8	1.06821	0.146231	0.0211026
	7	1.1652	0.223082	0.189437					1	1.35969	0.265326	0.0799772
	7	1.1945	0.183804	0.125829					1	1.24122	0.306233	0.0696524
	11	1.31765	0.173652	0.239219					0	NaN	NaN	0.105395
	6	1.55219	0.282469	0.0911244					4	1.18267	0.404032	0.0746243
	5	0.935155	0.313833	0.308106					7	1.1081	0.340297	0.049217
									0	NaN	NaN	0.0084786
									2	1.37763	0.26138	0.192753
									1	0.702138	0.25671	0.0703986
									4	0.777749	0.422905	0.0925763
									0	NaN	NaN	0.175303

[truncated: 1 more sheets: 4 - S2c]
