# Supplementary material for: Phagocytic ‘teeth’ and myosin-II ‘jaw’ power target constriction during phagocytosis
Source: eLife. 2021 Oct 28;10:e68627. doi: 10.7554/eLife.68627 (PMC8585483; doi:10.7554/eLife.68627)
Supplement: Figure 6—source data 1. [file elife-68627-fig6-data1.xlsx]

## Sheet: 6d
	Time	Target translocation	Particle diameter	Sphericity
	(s)	(mm)	(mm)
							*Translocation at time 0 is lacking, because translocation was calculated using the change in position between two timeframes
	0	*	7.73272	0.945972
	13.2	0.694409	7.83794	0.942178
	26.4	0.143244	7.85607	0.899252
	39.6	0.545562	7.94307	0.934245
	52.8	0.603996	7.79434	0.91437
	66	0.618933	7.74354	0.90675
	79.2	0.552587	7.7205	0.92557
	92.4	0.295599	7.62464	0.905156
	105.6	0.634075	7.64163	0.923533
	118.8	0.542812	7.49754	0.926855
	132	1.5755	7.54474	0.932853
	145.2	0.450939	7.45047	0.926459
	158.4	0.742664	7.33226	0.901252
	171.6	0.796068	7.24823	0.836112
	184.8	0.566492	7.03657	0.711147
	198	0.653568	7.12763	0.675449
	211.2	0.74855	6.99705	0.575184
	224.4	0.375011	6.69861	0.492268
	237.6	0.620167	6.54651	0.447507
	250.8	0.426326	6.67627	0.461892
	264	1.33111	6.91939	0.540604
	277.2	0.547405	6.8114	0.479037
	290.4	0.341413	6.58819	0.525039
	303.6	0.405893	6.36684	0.567706
	316.8	0.321334	6.55997	0.550498
	330	0.277201	6.61845	0.538425
	343.2	0.32931	6.65152	0.530711
	356.4	0.263883	6.47052	0.525719
	369.6	0.240685	6.44573	0.526121
	382.8	0.304886	6.40195	0.512059
	396	0.360323	6.25387	0.551216
	409.2	0.18668	6.60647	0.515835
	422.4	0.209141	6.25034	0.545918
	435.6	0.317068	6.48552	0.516564
	448.8	0.380028	6.74564	0.522795
	462	5.27102	7.84657	0.846625
	475.2	0.101924	7.82551	0.876037
	488.4	0.265833	7.77154	0.870364
	501.6	0.256475	7.82803	0.852572
	514.8	0.219056	7.8124	0.870773
	528	0.265973	7.83616	0.879167
	541.2	0.399155	7.7705	0.921574
	554.4	0.302125	7.64655	0.939222

## Sheet: 6e
					1.4 kPa Targets
					Date	Image Name	Total Internalization Events	Popping Internalization Events	Partial Eating Events
					2019-02-27	TL1 / TL2 (same cell)	1	0	0
						TL3	2	2	0
						TL4	1	0	0
						TL5	4	0	0
						TL6	2	2	0
						TL7	2	2	0
						TL8	1	0	0
						TL9	1	0	0
						TL10	1	0	0
						TL11	2	1	0
						TL13	1	0	0
						TL15	1	0	0
							19	7	0
					2019-02-28	TL2	1	0	1
						TL5	2	0	0
						TL6	2	0	1
						TL9	3	0	0
						TL10	5	2	0
						TL11	2	1	0
						TL12	4	1	2
						TL13	1	0	0
						TL14	2	1	1
						TL15	1	1	0
							23	6	5
					2019-03-01	TL1	2	0	0
						TL2	2	1	0
						TL3	1	0	0
						TL4	3	1	0
						TL6	6	2	2
						TL7	3	1	0
						TL8	1	0	0
						TL9	3	0	1
						TL10	2	1	2
						TL11	3	1	1
						TL12	4	0	0
						TL13	3	0	1
							33	7	7
					2019-03-02	TL2	3	0	0
						TL3	2	0	0
						TL4	3	0	1
						TL5	1	0	0
						TL6	2	0	0
						TL7	1	1	0
						TL8	3	1	0
						TL9	1	0	0
							16	2	1
								12.5
					Pooled Total		91	22	13
								24.1758	14.2857

## Sheet: 6f
6.5 kPa Targets					1.4 kPa Targets
Date	Image Name	Total Internalization Events	Successful Internalization Events		Date	Image Name	Total Internalization Events	Successful Internalization Events
2020-02-19	TL2	1	1		2019-02-27	TL1 / TL2 (same cell)	1	0
	TL4	2	2			TL3	2	2
	TL5	1	1			TL4	1	1
	TL7	3	3			TL5	4	4
	TL8	1	1			TL6	2	2
	TL10	2	2			TL7	2	2
	TL11	5	5			TL8	1	0
	TL12	6	6			TL9	1	1
	TL13	5	5			TL10	1	1
	TL14	2	2			TL11	2	1
	TL15	1	1			TL13	1	1
	TL17	1	1			TL15	1	1
	TL18	4	3				19	16
	TL19	1	1
	TL20	2	2
	TL21	1	1		2019-02-28	TL2	1	0
	TL22	3	3			TL5	2	2
	TL23	4	3			TL6	2	1
	TL24	1	1			TL9	3	1
	TL25	6	5			TL10	5	3
	TL26	4	4			TL11	2	1
	TL27	4	4			TL12	4	2
	TL28	5	5			TL13	1	1
	TL29	1	1			TL14	2	1
	TL30	1	1			TL15	1	1
		67	64				23	13
2019-03-02	TL1	1	1
	TL2	5	4		2019-03-01	TL1	2	2
	TL3	1	1			TL2	2	2
	TL4	5	4			TL3	1	1
	TL5	1	0			TL4	3	3
	TL6	1	1			TL6	6	4
	TL7	3	3			TL7	3	3
	TL8	2	2			TL8	1	1
	TL9	3	2			TL9	3	2
		22	18			TL10	2	1
						TL11	3	2
						TL12	4	4
Pooled Totals		89	82			TL13	3	2
		% Succesful:	92.1348				33	27
		% Failed:	7.86517
					2019-03-02	TL2	3	2
						TL3	2	2
						TL4	3	1
						TL5	1	0
						TL6	2	2
						TL7	1	1
						TL8	3	1
						TL9	1	1
							16	10
								62.5
					Pooled Totals		91	66
							% Succesful:	72.5275
							% Failed:	27.4725

## Sheet: 6 - S1b
	Time	Target translocation	Particle diameter	Sphericity
	(s)	(mm)	(mm)
	0	*	7.43022	0.953398			*Translocation at time 0 is lacking, because translocation was calculated using the change in position between two timeframes
	13.2	1.00118	7.31882	0.968816
	26.4	1.24551	7.27029	0.955607
	39.6	0.746701	7.30161	0.958042
	52.8	0.720281	7.24257	0.958651
	66	0.86314	7.22719	0.945801
	79.2	0.507476	7.20639	0.942662
	92.4	0.278484	7.21939	0.954231
	105.6	0.794298	7.16425	0.948364
	118.8	0.522307	6.99857	0.913344
	132	0.374883	6.81304	0.759928
	145.2	0.489448	6.12883	0.653412
	158.4	2.95592	7.08794	0.856011
	171.6	0.531204	7.12395	0.902458
	184.8	0.275095	7.07252	0.929714
	198	0.189967	7.00327	0.947124
	211.2	0.358592	6.84762	0.931364
	224.4	0.406628	6.87092	0.936308
	237.6	0.22526	6.81975	0.937203
	250.8	0.389377	6.73793	0.90297
