# Supplementary figures and images for: Phagocytic ‘teeth’ and myosin-II ‘jaw’ power target constriction during phagocytosis
Source: eLife journal article supplement (doi:10.7554/elife.68627), 2021-10-28

**a**

cortactin  
F-actin  
DAAM

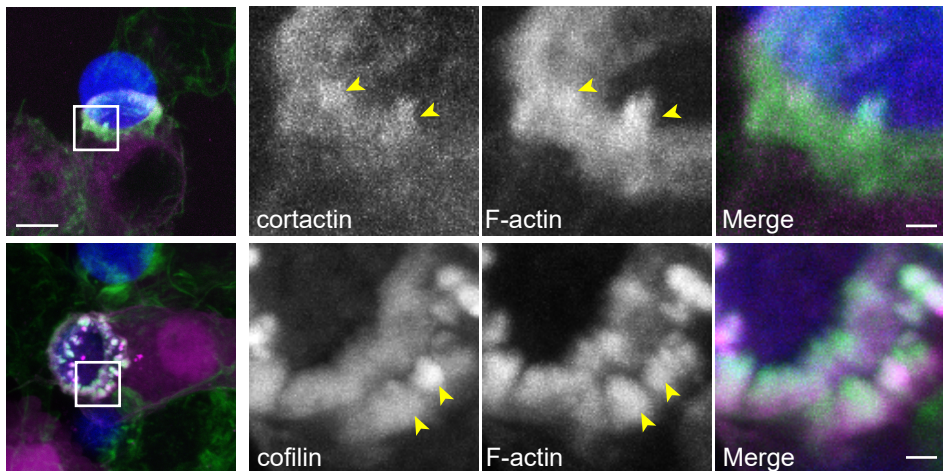**b**

myosin-II  
F-actin  
DAAM

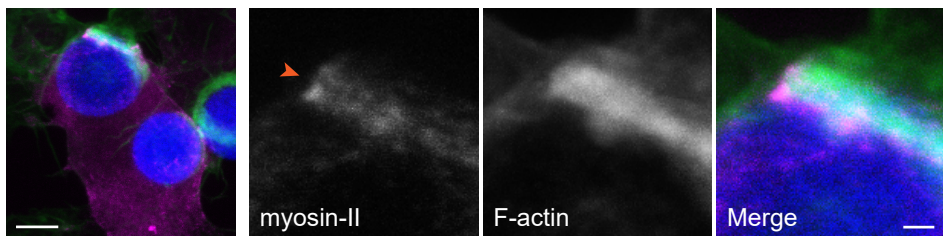**c**

paxillin  
F-actin  
DAAM

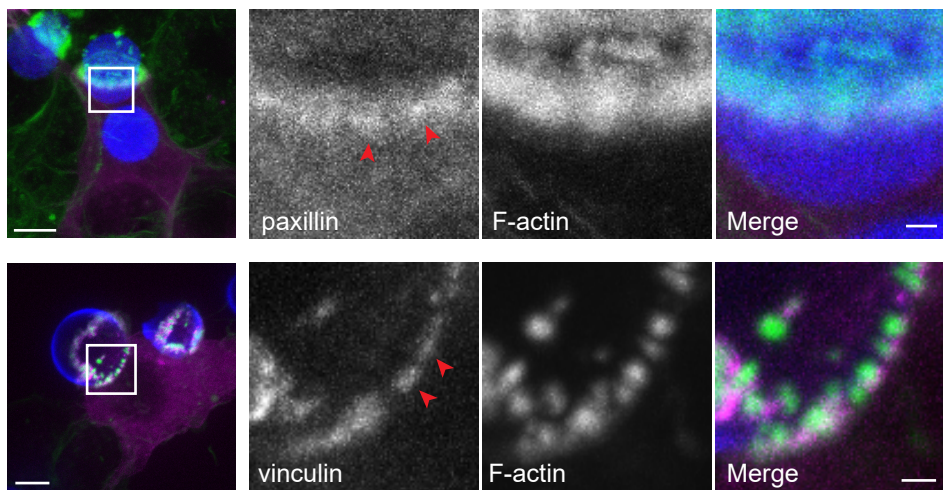

Supplement: supp [file elife-68627-supp-v1.zip]
